# Supplementary material for: Control of pili synthesis and putrescine homeostasis in Escherichia coli
Source: eLife. 2025 Apr 3;13:RP102439. doi: 10.7554/eLife.102439 (PMC11968103; doi:10.7554/eLife.102439)
Supplement: Supplementary file 2. — J15 refers to the ΔspeB mutant. In the tab labeled ‘W3110_0_vs_J15_1_ Putrescine’ W3110 was grown without putrescine, and J15 was grown with 1.0 mM putrescine; positive fold change values refer to increases in J15 gene expression. [file elife-102439-supp2.xlsx]

## Sheet: W3110_0_vs_J15_0_putrescine
genes	logFC	logCPM	F	PValue	FDR
aaeA	0.780332	4.08805	12.6596	0.0113373	0.0214252
aaeB	1.89564	4.6739	71.8821	2e-05	0.000136765
aaeX	-1.81715	3.55427	50.1547	7.74e-05	0.000357021
aas	2.26294	6.74004	173.66	6.03e-07	1.9e-05
aat	-0.955197	4.76749	34.5626	0.000294778	0.00101339
abpA	1.08592	5.69302	29.1447	0.000529128	0.00160149
abrB	-1.52013	4.94108	20.2439	0.00172553	0.00421941
accD	0.631372	9.6106	7.73014	0.0225897	0.0390532
aceA	1.4934	4.8773	41.2815	0.000157243	0.000616209
aceB	2.69513	5.64606	54.3844	5.73e-05	0.000288179
ackA	-3.54532	7.65462	303.325	6.11e-08	8.55e-06
acnA	0.684123	6.88	20.5956	0.0016355	0.00403924					717
acpH	-0.91196	4.63269	30.676	0.000444749	0.00139954
acpP	-2.75844	12.2257	111.464	3.59e-06	4.44e-05
acpS	-1.29358	6.0364	36.2834	0.000248679	0.000883094
acpT	-1.93287	5.61425	91.7909	7.73e-06	7.17e-05
acrA	1.06908	8.81846	39.123	0.000190506	0.000718418
acrB	2.29779	9.65028	128.897	2.01e-06	3.25e-05
acrD	1.28558	5.02693	38.1167	0.000208975	0.00077121
acrF	2.24713	4.53215	145.203	1.25e-06	2.64e-05
acrR	-0.508731	5.56429	8.71015	0.0172312	0.0309067
acrZ	-3.04303	4.86656	165.431	7.35e-07	2.07e-05
acs	1.10889	5.03811	37.6762	0.000217753	0.00079546
ada	1.23964	5.17596	30.7666	0.000440297	0.00139074
add	-1.20253	4.99266	12.1457	0.0075284	0.0150246
adeD	0.868195	4.96499	22.6186	0.00121695	0.00316556
adeP	-1.18064	8.75877	19.6733	0.00188504	0.00457748
adhE	-2.02569	8.81051	25.2052	0.000857537	0.00236731
adhP	0.692917	5.53617	12.8417	0.00648492	0.013212
adiA	1.55565	5.40372	64.8814	2.95e-05	0.000177392
adiY	-1.29427	2.73908	29.6895	0.019431	0.0342263
aegA	1.50156	4.76294	12.4333	0.00707375	0.0142083
aer	2.7733	6.05702	147.402	1.17e-06	2.58e-05
aes	0.834707	4.27435	17.9738	0.00336812	0.00753834
afuC	1.36126	3.75486	50.2496	0.000164474	0.000641554
agaR	1.42811	7.39353	29.4854	0.00050875	0.00154986
agaS	1.20108	2.95506	23.4567	0.0161023	0.0292036
agp	1.06771	5.28106	36.7111	0.000238635	0.000856843
ahpC	-1.70047	10.924	47.1114	9.74e-05	0.000421973
ahpF	1.68499	8.90728	50.1173	7.76e-05	0.000357612
ahr	0.969678	6.10171	24.6429	0.000923084	0.00250186
aidB	2.10371	6.31484	93.5346	7.18e-06	6.85e-05
ais	-1.43631	4.95833	13.006	0.00626537	0.0128457
alaA	-0.898651	6.53924	16.2051	0.00337232	0.0075421
alaE	-1.66589	6.0037	38.8668	0.00019501	0.000730157
alaS	1.87914	10.2286	98.9478	5.75e-06	5.91e-05
aldA	-1.82261	6.36153	112.265	3.49e-06	4.36e-05
allB	1.97884	3.35956	64.9237	2.94e-05	0.000177392
allC	1.798	4.03141	64.9538	2.94e-05	0.000177392
allD	1.44407	2.73285	26.2127	0.0102853	0.0197389
allE	0.664045	4.71057	17.1262	0.00588724	0.0122016
allR	-0.948026	7.19282	32.5041	0.000364698	0.00120164
alpA	-2.84302	1.74878	40.3129	0.010572	0.0201785
alr	-0.94262	7.2248	11.3188	0.00905447	0.017651
alsA	1.44123	3.07106	19.0575	0.00281915	0.00644707
alsK	0.923737	4.26185	18.6862	0.00220655	0.00520186
alsR	-0.948919	5.36593	31.736	0.000395958	0.00128054
amiB	1.28486	7.28544	61.2993	3.66e-05	0.000206672
amiC	2.16975	7.78881	141.763	1.37e-06	2.77e-05
amiD	0.751974	6.1969	19.9431	0.00180744	0.00439666
amn	-0.947458	5.25445	22.3112	0.00127117	0.00326817
ampD	-0.488027	5.53005	6.8015	0.0297304	0.0495624
ampE	0.881023	5.64677	23.862	0.00102474	0.0027333
ampG	-0.763761	6.95546	6.78682	0.0298644	0.0497463
amyA	1.59664	6.20978	88.0858	9.08e-06	7.88e-05
anmK	0.563455	5.0026	10.8956	0.0101736	0.0195694
ansA	-1.59524	5.83759	44.0126	0.000124813	0.000512908
ansP	2.42485	4.73193	38.9566	0.000193417	0.000726785
apaG	-2.84319	8.00285	110.517	3.71e-06	4.52e-05
apaH	-0.866646	6.67064	12.7587	0.00659959	0.0134196
appA	1.22267	7.28443	27.228	0.000664646	0.00192166
appB	1.51083	8.18104	39.4985	0.000184136	0.000700682
appC	2.1045	8.94254	81.4127	1.23e-05	9.86e-05
appX	4.21537	2.32494	62.1085	3.48e-05	0.000198816
apt	-2.02752	7.62396	56.2941	5.04e-05	0.000260245
araE	2.45959	5.54625	114.921	3.18e-06	4.12e-05
araF	1.50434	2.80656	23.9978	0.0058902	0.0122016
araG	1.38204	3.48469	45.6542	0.000623836	0.00182503
arcB	1.41818	7.34701	52.2017	6.68e-05	0.000322448
arfB	-0.707469	5.72231	15.8426	0.00360143	0.00799661
argA	2.47584	5.71234	50.05	7.8e-05	0.000358601
argB	1.79371	5.57727	20.179	0.00174281	0.00425672
argC	3.14518	5.8215	17.0056	0.00292703	0.00665032
argD	1.99704	6.93702	62.5543	3.39e-05	0.000195781
argE	0.96944	5.77994	15.7161	0.00368592	0.00813692
argF	1.9399	6.4301	15.3963	0.00391073	0.00855676
argG	3.04115	8.2134	37.2277	0.000227165	0.000823399
argH	1.72746	6.08923	116.054	3.06e-06	4.04e-05
argI	2.22767	4.03642	8.54813	0.0179978	0.032024
argO	1.20797	5.5563	58.9237	4.25e-05	0.000229683
argR	-2.13493	7.41569	121.842	2.52e-06	3.75e-05
argS	1.49708	8.70674	26.402	0.00073616	0.00209811
arnC	-2.51806	4.25889	41.2527	0.000157637	0.000617178
arnF	0.757358	5.6788	13.6357	0.00550472	0.0115464
aroA	0.768908	7.6305	19.6015	0.00190637	0.00461503
aroB	0.950367	9.50004	17.1779	0.00284094	0.00648408
aroC	0.421819	7.37417	7.04076	0.0276483	0.0466844
aroD	-1.15978	4.57194	33.6102	0.000324851	0.00109526
aroF	1.97556	7.04797	103.451	4.83e-06	5.32e-05
aroH	-0.968698	5.57063	26.6965	0.000709622	0.00203212
aroP	1.27707	6.70132	34.4642	0.000297721	0.001021
arpB	2.53806	3.57711	103.073	4.9e-06	5.35e-05
arsB	0.854056	3.61308	9.70577	0.0215441	0.0375546
arsC	-1.28761	3.26896	24.5056	0.00323165	0.00726387
arsR	-1.03673	3.29839	9.96978	0.0144868	0.0266691
artJ	1.4663	5.36164	9.74913	0.0131729	0.0245082
artQ	-0.639909	6.30249	11.0155	0.00970909	0.0187617
ascB	0.989086	4.30907	29.7706	0.000511509	0.00155689
ascF	0.879221	3.81867	15.7789	0.0102084	0.0196272
aslA	1.65726	3.59238	49.4488	8.16e-05	0.000371272
aslB	2.48232	3.97026	122.327	2.48e-06	3.71e-05
asmA	1.32643	6.94248	54.111	5.84e-05	0.00029259
asnB	0.942587	7.31814	9.07135	0.0156635	0.0285229
asnC	-1.63656	3.97864	41.8989	0.000149077	0.00059194
aspA	-2.46071	8.06896	89.219	8.64e-06	7.68e-05
aspC	-1.13536	8.26256	29.0732	0.000533532	0.00160798
astB	0.983422	5.11814	8.00309	0.02091	0.0366318
atl	-1.8224	4.59699	44.0391	0.000124541	0.000512908
atoA	-3.34459	1.35609	53.5645	0.0290591	0.0485451
atoB	1.14054	2.92146	24.5503	0.0239908	0.0412041
atoS	1.15496	3.30588	36.0967	0.00696589	0.0140219
atpC	-1.58562	10.3062	22.2451	0.00128322	0.00329154
atpE	-2.34183	11.234	67.8939	2.48e-05	0.000158442
atpF	-0.993705	10.6876	9.85157	0.0128407	0.0239964
atpH	-1.2126	10.3832	13.5112	0.00564556	0.0117819
atpI	-1.10563	9.25632	21.3974	0.00145105	0.00364367
avtA	-1.31706	7.23524	31.4753	0.00040732	0.00130622
azoR	-1.66643	4.7978	57.4087	4.68e-05	0.000247549
azuC	4.51163	2.56739	139.734	1.45e-06	2.83e-05
baeR	-0.936374	4.9005	17.1913	0.00283436	0.00647478
bamA	2.00444	10.6032	89.792	8.42e-06	7.59e-05
bamB	0.94014	8.96952	23.3592	0.00109758	0.00289995
bamC	0.8784	9.16728	20.435	0.00167588	0.00412924
bamD	-1.06014	8.40551	34.5534	0.000295051	0.0010135
bamE	-1.28137	8.21366	49.9143	7.88e-05	0.000361024
barA	1.18883	4.84383	47.3785	9.54e-05	0.000417551
basR	-1.54068	5.85021	57.1033	4.78e-05	0.000251597
bax	-0.587824	6.96877	7.97375	0.0210829	0.0369039
bcp	-2.27855	8.4934	131.356	1.86e-06	3.13e-05
bcsA	2.34793	5.0432	77.3433	1.51e-05	0.000111915
bcsC	1.78459	5.67441	110.319	3.74e-06	4.53e-05
bcsF	-3.55517	4.07708	208.981	2.83e-07	1.4e-05
bcsG	-2.04895	5.34813	77.7142	1.48e-05	0.000110451
bcsQ	0.626732	5.83136	11.6047	0.00848658	0.0166578
bdm	-4.47212	3.59744	197.227	3.59e-07	1.54e-05
bepA	1.2721	6.64398	40.7891	0.000164153	0.0006409
betA	1.13836	6.39608	41.7898	0.00015048	0.000595822
betB	1.53105	7.36985	56.8844	4.85e-05	0.000253656
betT	2.38107	7.56091	79.2526	1.37e-05	0.000105575
bfd	-4.84756	7.13811	262.217	1.12e-07	9.56e-06
bfr	-0.993674	7.59273	18.7581	0.00218095	0.0051607
bglB	1.56762	2.51212	17.283	0.0130818	0.0243817
bglG	1.64006	3.11048	10.3995	0.0112305	0.0212424
bglH	2.51534	3.3151	39.7043	0.000180755	0.00069095
bglJ	-2.994	6.86879	172.317	6.23e-07	1.91e-05
bglX	2.29592	7.32584	142.879	1.33e-06	2.72e-05
bioA	-1.23932	6.53267	12.5195	0.00694409	0.0139847
bioB	-1.25687	7.60697	20.4388	0.00167489	0.00412924
bioC	-1.99725	6.46177	82.7961	1.16e-05	9.37e-05
bioD	-2.95353	6.71982	132.567	1.8e-06	3.07e-05
bioF	-1.32584	7.1263	22.3274	0.00126824	0.00326263
bioP	-2.37115	6.96099	60.6521	3.81e-05	0.000212834
bisC	1.92694	6.60213	139.206	1.48e-06	2.84e-05
blr	-2.06297	4.5103	29.08	0.000533113	0.00160798
bolA	-0.601465	7.5527	6.90397	0.0288155	0.0483248
brnQ	-1.1919	6.59467	54.0397	5.87e-05	0.000293118
bsmA	-1.61205	4.982	56.998	4.81e-05	0.00025271
bssR	-4.56114	6.64424	35.3856	0.000271519	0.000950543
bssS	-0.917139	7.39983	27.0459	0.00067965	0.00195849
btsR	-1.34116	5.08679	24.6724	0.000919491	0.00249373
btsS	-1.17047	4.96662	19.5681	0.00191641	0.00462958
btsT	-3.75881	6.18418	255.024	1.25e-07	9.56e-06
btuC	0.945732	5.56965	23.7816	0.00103598	0.00275977
btuD	0.931456	5.85343	30.3226	0.000462653	0.00144506
btuE	-0.501019	5.96505	7.57543	0.0236168	0.0406283
btuF	-1.46748	5.63843	26.3519	0.000740796	0.0021056
cadB	-2.04547	3.82263	11.0574	0.00961528	0.0186318
cadC	0.951266	3.74282	24.9459	0.00716696	0.0143442
caiA	0.736125	5.04255	16.5111	0.00319281	0.00718425
caiF	-1.65212	4.13219	29.6056	0.000501792	0.00153423
can	-1.24509	8.89129	38.5941	0.00019995	0.000743352
cas1	1.38578	4.34924	34.9859	0.00028252	0.000977651
cas3	2.77458	4.51829	51.137	7.21e-05	0.000338738
casA	2.94872	4.7693	62.4821	3.41e-05	0.00019599
casC	1.81935	4.12747	37.561	0.000220124	0.000802029
casD	1.1717	3.79953	12.7784	0.00657215	0.0133703
casE	1.18434	3.91538	16.2147	0.00336646	0.00753834
cbl	1.24697	6.16672	8.8849	0.0164494	0.0297222
cbpA	1.10283	6.58651	26.964	0.000686526	0.00197406
cbpM	-1.20209	5.73918	27.7374	0.000624804	0.00182658
cbrA	0.834303	4.86333	10.4105	0.0112008	0.0212054
cbrC	0.770054	6.13006	10.9788	0.00979232	0.0188964
cca	0.643869	7.08866	18.0924	0.00243297	0.00565629
ccmC	-0.692035	4.58472	19.737	0.00618941	0.0127148
ccmD	-2.55889	3.31681	107.028	4.22e-06	4.89e-05
ccmE	-0.920844	4.3562	30.6174	0.000946433	0.00256018
ccmG	-1.40663	4.13566	47.2436	9.64e-05	0.000418791
ccp	1.31983	4.4925	17.947	0.00249271	0.0057728
cdaR	1.95653	5.15822	79.3703	1.36e-05	0.000105552
cdgI	1.37085	3.8088	14.4473	0.00468561	0.0100072
cdh	0.570507	5.70146	6.78526	0.0298787	0.0497505
cdsA	0.996002	8.4198	25.6845	0.000806157	0.00224961
cedA	-3.16668	4.91345	136.699	1.59e-06	2.93e-05
chaB	-1.20035	3.38903	22.2822	0.00362471	0.00802709
chaC	0.852732	6.1153	22.3446	0.00126514	0.00325864
chbB	-0.857781	4.39101	18.2768	0.00235971	0.00551342
chbC	2.57744	4.0534	136.989	1.57e-06	2.93e-05
chbF	1.97473	3.55837	65.2877	2.88e-05	0.000175747
chbG	1.23152	4.46395	37.5654	0.000220032	0.000802029
chbR	0.785206	4.01062	16.0238	0.0129015	0.0240885
chiA	2.24367	5.54015	179.505	5.27e-07	1.77e-05
chiP	1.05762	3.04551	21.8528	0.0262528	0.044651
chiQ	-0.849961	4.4349	23.1033	0.00176662	0.00430984
cho	-0.605454	4.64689	10.8524	0.0137234	0.0253861
chpS	-0.951436	4.62603	19.3827	0.00197328	0.00474785
cirA	-2.33433	8.01302	40.2133	0.000172718	0.000666902
clcA	2.0132	6.75629	84.3572	1.07e-05	8.84e-05
clpA	2.55936	10.3425	62.2713	3.45e-05	0.000197323
clpB	2.1838	8.54956	30.1846	0.000469882	0.00145751
clpS	-1.45726	6.43917	29.4334	0.000511797	0.00155689
clpX	1.37587	9.70492	48.7723	8.58e-05	0.000387626
clsA	2.44238	7.35201	146.896	1.19e-06	2.58e-05
clsB	0.879398	4.19091	22.6962	0.00288077	0.00656298
cmk	0.698753	7.86732	12.5277	0.00693191	0.0139669
cmoA	-0.689801	6.2624	9.62672	0.0135841	0.0252062
cnoX	-1.18372	6.95693	47.2458	9.64e-05	0.000418791
coaE	-1.1139	6.52002	46.8689	9.93e-05	0.000427367
cobC	-1.65481	5.32715	38.742	0.000197252	0.000735277
cobS	1.95475	6.02852	76.0209	1.61e-05	0.000117231
cobT	2.10639	6.61725	117.986	2.86e-06	3.88e-05
cobU	1.23928	5.78317	30.4387	0.000456673	0.00143064
codB	0.587884	7.55393	8.71491	0.0172093	0.0308958
copA_1	3.23702	8.56363	79.2095	1.37e-05	0.000105575
corA	2.8579	8.36945	121.579	2.54e-06	3.75e-05
cpdB	1.79574	5.73739	56.8012	4.88e-05	0.000254415
cpoB	-0.539166	9.41659	7.08106	0.0273158	0.0462343
cpxA	0.49355	7.30069	7.74977	0.0224634	0.0388829
cpxP	-2.4765	8.21577	25.5351	0.000821755	0.00228622
cpxR	-0.958572	7.44388	31.5655	0.000403342	0.00129572
crcB	-1.85565	6.06126	113.178	3.38e-06	4.25e-05
creB	0.706551	6.3862	19.581	0.00191252	0.00462285
creC	1.54717	5.67472	64.6577	2.99e-05	0.000178712
creD	1.53185	5.20079	49.8407	7.92e-05	0.000362203
crfC	1.97701	4.70054	37.9334	0.000212574	0.000781296
crr	-0.876142	9.99412	10.6038	0.0106951	0.0203489
csdA	0.862484	6.93653	19.5053	0.00193544	0.00466691
csdE	-0.438036	6.44274	7.34226	0.0252778	0.043185
csgB	2.08488	2.71541	16.0155	0.00348986	0.00776941
csgD	1.12928	5.21122	13.1711	0.00605398	0.0124793
csgG	0.647434	4.60912	9.13375	0.0154109	0.0281239
csiE	0.711516	3.97709	16.2963	0.0254382	0.0434062
cspA	-5.15242	13.5684	341.064	3.76e-08	7.61e-06
cspB	-1.11428	8.81345	11.223	0.00925502	0.0179835
cspD	-2.2375	6.72116	113.516	3.34e-06	4.25e-05
cspE	-6.57689	13.9496	478.101	9.2e-09	4.5e-06
cspF	-0.56685	5.55632	10.7252	0.010392	0.0199165
cspG	-2.27112	10.0301	37.4519	0.000222398	0.000809615
cspH	-0.650547	5.09436	13.1791	0.00604386	0.0124673
csrA	-3.0576	9.9012	249.64	1.37e-07	9.72e-06
csrD	2.58517	7.3509	207.937	2.89e-07	1.4e-05
cueO	2.81812	7.45626	129.092	2e-06	3.24e-05
cueR	-0.716036	6.19357	18.6955	0.00220322	0.00519985
curA	0.789243	5.13602	13.9456	0.00517245	0.0109413
cusA	2.45692	4.06928	118.884	2.78e-06	3.85e-05
cusC	1.90983	2.69787	34.7426	0.00135646	0.00343697
cusS	1.18928	5.14074	45.5831	0.000109891	0.000463974
cutA	-3.27534	4.96213	259.774	1.16e-07	9.56e-06
cvpA	-1.96559	9.80717	47.3108	9.59e-05	0.000418524
cvrA	1.56243	5.95039	23.5154	0.00107429	0.00284918
cyaA	1.10685	8.52689	31.8461	0.000391281	0.00126834
cyaY	-2.85709	7.03294	154.806	9.62e-07	2.36e-05
cybB	-0.87154	6.18175	17.7368	0.00258238	0.00594117
cycA	0.477061	7.65672	7.60477	0.0234176	0.0403186
cydA	0.619697	7.35262	8.77378	0.0169412	0.0304667
cydC	0.495375	5.80607	7.24844	0.0259872	0.0442351
cydD	1.15594	5.9178	48.3447	8.86e-05	0.000397294
cydX	-3.76173	6.13506	258.334	1.19e-07	9.56e-06
cyoA	-1.19126	10.6351	25.1106	0.000868158	0.00238687
cyoC	-2.07493	9.74471	55.6701	5.26e-05	0.000269277
cyoD	-2.60015	9.58815	102.046	5.09e-06	5.46e-05
cyoE	-1.649	10.2456	42.9285	0.000136592	0.000550692
cysB	0.931817	7.10742	14.9244	0.00427438	0.00923697
cysC	1.18529	7.50103	15.4126	0.00389885	0.0085398
cysD	1.87612	9.15932	47.0589	9.78e-05	0.000423261
cysE	-0.845413	7.29951	18.1013	0.00242937	0.00565615
cysG	1.01103	6.70601	37.3397	0.000224767	0.00081753
cysH	-0.943468	7.58609	16.0597	0.00346201	0.00771559
cysJ	1.01728	9.17101	33.0499	0.000344322	0.00114984
cysK	1.36903	10.988	22.2738	0.00127797	0.00328363
cysN	2.72791	9.53285	62.6802	3.36e-05	0.000194685
cysP	1.16018	8.42344	16.5589	0.00316585	0.00713122
cysQ	1.0152	6.25534	14.2496	0.00487036	0.0103597
cysU	0.723107	7.2314	7.93029	0.0213423	0.0372958
cysZ	-1.29384	5.44847	39.0539	0.000191709	0.000722303
cytR	-0.968209	6.37443	39.454	0.000184877	0.000702866
cyuA	2.1627	4.93843	113.261	3.37e-06	4.25e-05
cyuP	0.935026	3.79418	21.8227	0.00711472	0.01426
dacD	1.55057	5.34843	78.4104	1.43e-05	0.000107858
dadA	1.39968	8.66279	51.134	7.21e-05	0.000338738
dadX	1.11543	7.90919	46.3621	0.000103309	0.000441475
dam	-1.2698	7.10841	24.4279	0.000949781	0.00256429
dapB	-0.488349	7.19951	6.88478	0.0289841	0.0484915
dapD	-0.671913	9.11919	10.6822	0.0104982	0.020065
dapE	1.58892	7.50451	97.2007	6.17e-06	6.2e-05
dapF	0.762497	7.70542	14.4721	0.00466311	0.00996963
dcd	-0.817129	7.24804	20.3823	0.00168937	0.00415782
dcm	1.23362	6.62294	35.4992	0.00026849	0.000943082
dcp	0.66183	6.00582	11.6882	0.00832925	0.0163816
dcrB	-2.1054	8.46712	78.7961	1.4e-05	0.000106789
dctA	-3.14627	7.36192	204.861	3.07e-07	1.4e-05
dcuA	1.03384	7.29514	27.9558	0.000608632	0.00179052
dcuB	-1.04171	3.44748	8.92981	0.0162557	0.0294131
dcuR	-1.7811	4.97011	89.2889	8.61e-06	7.68e-05
dcyD	0.798416	6.71667	9.08514	0.0156072	0.0284451
ddpA	-1.66196	3.5014	26.7059	0.000708793	0.00203113
ddpF	1.1801	3.47117	23.8153	0.00322652	0.00725622
ddpX	-3.80704	3.86848	146.492	1.2e-06	2.58e-05
deaD	1.96467	10.868	33.1155	0.00034197	0.0011438
decR	-1.44653	4.91909	54.3599	5.74e-05	0.00028832
def	-1.54982	8.46274	36.2611	0.000249219	0.000884264
degP	1.43166	8.6963	16.8429	0.00301135	0.00682714
degQ	1.77248	6.45128	97.304	6.15e-06	6.2e-05
deoB	0.889233	7.98805	15.915	0.00355417	0.00789586
deoC	-2.21525	5.46945	60.0497	3.96e-05	0.00021781
deoD	-1.47189	7.58848	27.3551	0.000654415	0.00190481
der	1.34814	8.78887	32.4534	0.000366663	0.00120623
dfp	-1.96984	7.00043	64.8052	2.96e-05	0.000177677
dgcE	1.6271	5.19482	80.8685	1.27e-05	0.00010029
dgcI	-1.04402	5.56295	19.2475	0.00201607	0.0048287
dgcJ	2.94071	5.39234	148.918	1.12e-06	2.54e-05
dgcM	1.38863	4.59017	36.1101	0.000252897	0.000894294
dgcN	0.806155	5.35702	11.0341	0.00966732	0.0186913
dgcQ	1.55983	5.66054	81.4949	1.23e-05	9.85e-05
dgcT	2.41953	5.96219	54.6586	5.63e-05	0.000284189
dgcZ	0.949394	5.5274	12.4663	0.00702375	0.0141248
dgkA	-0.655399	5.96235	14.0585	0.00505761	0.01072
dgoR	0.613497	4.41063	8.03875	0.0232971	0.0401439
dgoT	1.3358	3.71776	33.5531	0.000326771	0.00110085
dgt	1.2747	5.73237	27.1568	0.000670462	0.00193581
dhaK	-2.21027	7.55118	148.295	1.14e-06	2.57e-05
dhaL	-2.43984	6.68378	216.563	2.45e-07	1.34e-05
dhaM	-1.51124	7.24255	68.402	2.41e-05	0.000156579
dhaR	2.76102	5.7196	64.9028	2.95e-05	0.000177392
diaA	-0.931182	6.12972	30.1277	0.000472903	0.00146509
dicA	-3.18808	6.57685	288.029	7.57e-08	8.59e-06
dicB	2.49327	2.2225	11.813	0.00810077	0.0159791
dinB	0.537198	7.37025	9.66223	0.0134632	0.025004
dinF	1.15015	6.23264	34.4145	0.00029922	0.0010253
dinG	1.26187	6.60318	18.6119	0.00223343	0.00525933
dinI	-1.62051	6.55076	61.9699	3.51e-05	0.000200215
dinJ	-3.18013	7.61273	229.043	1.95e-07	1.22e-05
djlA	-0.512039	6.6113	8.91634	0.0163135	0.0295019
djlB	1.2245	2.77707	15.7258	0.0238274	0.0409738
djlC	2.03563	4.27099	86.2374	9.86e-06	8.3e-05
dkgA	-0.919717	4.76061	30.7085	0.000443144	0.00139554
dld	1.14645	6.96259	48.9578	8.46e-05	0.000383078
dmlA	1.07648	2.98214	22.1327	0.02797	0.0471896
dmsD	-0.744501	5.08	13.6011	0.00554336	0.0116041
dnaA	1.02481	8.79503	13.6352	0.00550522	0.0115464
dnaC	-0.787109	5.66629	12.9197	0.00637957	0.0130353
dnaG	0.991705	8.76247	12.6652	0.0067316	0.0136287
dnaT	-1.99851	5.95464	79.6108	1.35e-05	0.000104709
dosC	1.91507	2.99697	28.6004	0.000563823	0.00167518
dosP	1.62451	3.01603	31.2815	0.00121488	0.00316216
dpiB	1.47913	5.12949	67.9274	2.48e-05	0.000158442
dppA	1.92717	8.10322	52.821	6.39e-05	0.000313328
dppF	-0.63988	6.25959	15.8076	0.00362458	0.00802709
dps	-1.44555	8.00476	26.2289	0.000752339	0.00212834
dsbA	-1.54642	8.16001	32.0604	0.000382366	0.00124714
dsbB	-1.26362	6.47288	37.789	0.000215462	0.000789152
dsbD	-0.706829	5.21115	17.0639	0.00289754	0.00659044
dsbG	-0.962829	5.60576	21.8135	0.00136548	0.0034515
dsdA	0.756418	4.20962	18.0741	0.00989034	0.0190768
dsrB	-3.31678	6.71042	206.781	2.96e-07	1.4e-05
dtd	-0.98795	7.04506	33.6742	0.000322714	0.00108981
dtpC	1.0441	4.12066	30.6379	0.000659586	0.00191451
dtpD	1.16263	4.62776	22.6876	0.00120516	0.00314465
dusB	1.99101	10.6066	88.2205	9.03e-06	7.85e-05
dut	-2.50548	6.90748	99.7798	5.57e-06	5.84e-05
dxs	-0.618114	7.28756	9.9807	0.0124367	0.0233139
eaeH	1.52885	2.33465	11.9945	0.0264592	0.0449125
eamA	1.49902	6.20484	40.0364	0.000175462	0.000674396
eamB	-1.68879	3.74687	47.705	9.31e-05	0.000411553
ebgA	2.15405	3.06276	77.4963	3.19e-05	0.000186965
ebgR	-1.10195	4.94127	14.4343	0.00469751	0.0100276
ecnA	-2.65773	5.04809	62.4084	3.42e-05	0.000196291
ecnB	-2.27471	5.99199	170.257	6.54e-07	1.98e-05
ecpC	1.79281	4.60704	88.5778	8.88e-06	7.79e-05
ecpD	0.748476	4.86175	18.3722	0.00232285	0.00544852
ecpR	1.88117	4.7579	61.7256	3.57e-05	0.000202146
edd	1.75846	6.27204	80.7335	1.27e-05	0.000100478
efp	-1.87762	9.44728	47.7294	9.29e-05	0.000411217
elaA	-0.468385	5.15554	9.08573	0.0219088	0.0380955
elaB	-3.06746	7.73187	187.138	4.45e-07	1.67e-05
elfC	2.95198	4.23685	144.33	1.28e-06	2.67e-05
elfG	1.29612	4.27231	35.2727	0.000274574	0.000957248
elyC	0.581774	4.84215	7.9375	0.021299	0.0372356
emrD	1.46593	6.42145	33.4441	0.000330479	0.00111156
emrE	-1.34405	5.27498	28.6991	0.00055733	0.00166407
emrK	1.54772	2.83995	42.7485	0.00415976	0.00902175
emrY	1.34512	2.81763	32.6575	0.0122208	0.0229297
emtA	1.73311	7.37224	48.396	8.83e-05	0.000396654
endA	-1.05421	4.01479	36.7425	0.00094758	0.0025604
entA	-3.75696	6.61988	144.385	1.27e-06	2.67e-05
entB	-4.47184	6.96658	205.077	3.06e-07	1.4e-05
entC	-4.65352	6.99667	291.787	7.17e-08	8.59e-06
entD	-2.58744	5.16681	124.882	2.28e-06	3.55e-05
entE	-4.06394	6.57402	202.975	3.19e-07	1.44e-05
entF	-1.77108	6.59403	67.9925	2.47e-05	0.000158376
entH	-4.34723	6.28703	166.036	7.24e-07	2.07e-05
entS	-1.89057	6.34903	53.4886	6.1e-05	0.000301152
envC	0.533557	7.44025	10.5087	0.0109403	0.020759
envZ	0.68272	6.66331	13.1525	0.00607727	0.012515
epmC	-1.66939	6.37204	51.1142	7.22e-05	0.000338845
eptA	-1.26319	4.94683	9.86774	0.0127892	0.0239215
eptB	1.04206	6.19694	14.1406	0.00497609	0.0105685
eptC	-0.942187	6.6408	31.9753	0.000385877	0.0012547
erpA	-2.63924	8.70178	95.903	6.51e-06	6.37e-05
essD	-2.3326	4.13487	109.621	3.84e-06	4.59e-05
essQ	1.31211	2.58521	10.8632	0.0279237	0.0471303
etk	2.20433	5.42707	164.353	7.55e-07	2.07e-05
ettA	1.12353	9.39813	23.5003	0.00107651	0.00285325
eutA	1.3829	2.58395	32.5921	0.0215553	0.0375587
eutG	2.02596	2.35294	37.1649	0.00457341	0.00981251
eutM	-2.72991	2.319	85.553	0.000503618	0.00153869
evgS	1.22889	6.156	16.317	0.00330527	0.00741349
exbB	-2.47969	9.30967	134.564	1.69e-06	2.95e-05
exbD	-2.53928	8.70037	165.152	7.4e-07	2.07e-05
exoX	-1.3081	4.903	31.2052	0.000419516	0.00133514
fabA	-2.23172	9.41802	66.1152	2.75e-05	0.000170997
fabD	0.868933	9.70871	12.938	0.00635507	0.0129915
fabF	1.35263	10.9771	23.845	0.00102711	0.00273787
fabH	0.724502	9.74998	8.05612	0.020602	0.0361242
fabI	-1.9119	9.35867	39.2305	0.000188655	0.000713358
fabR	0.57521	8.32689	7.39235	0.024909	0.0426242
fabZ	-1.09438	9.18292	18.451	0.00229298	0.0053905
fadA	0.707666	5.06209	12.2059	0.00743029	0.01485
fadD	1.01847	6.36421	14.9129	0.00428377	0.0092525
fadE	2.32501	5.65669	163.288	7.75e-07	2.1e-05
fadH	1.53437	3.283	48.2228	0.000555662	0.00166145
fadJ	1.8025	5.18371	121.374	2.56e-06	3.75e-05
fadR	-0.982925	7.12789	18.88	0.00213836	0.00507816
fbaA	-1.78354	10.5783	26.1736	0.000757596	0.00214176
fbp	-2.31238	7.94209	96.9101	6.24e-06	6.25e-05
fdhD	0.634138	6.74925	14.3925	0.00473598	0.0101045
fdhE	-2.69782	7.70235	115.655	3.1e-06	4.06e-05
fdhF	2.6311	6.56224	84.7762	1.05e-05	8.71e-05
fdnH	1.28773	3.46186	11.6141	0.00846883	0.0166328
fdnI	1.1638	3.65954	11.9817	0.00780404	0.0154804
fdoH	-1.57418	8.22602	36.1716	0.000251391	0.000891217
fdoI	-2.46128	8.32133	90.021	8.34e-06	7.55e-05
fdrA	1.67553	2.17894	26.0728	0.0272804	0.0461931
fdx	-1.4907	8.336	30.6282	0.000447122	0.00140548
feaB	2.2767	5.23362	138.059	1.53e-06	2.9e-05
fecA	-2.91112	8.8523	74.9306	1.7e-05	0.000121735
fecB	-3.53243	8.03003	125.098	2.27e-06	3.54e-05
fecC	-3.89186	6.78215	138.227	1.52e-06	2.9e-05
fecD	-3.49432	6.19773	62.4455	3.41e-05	0.000196119
fecE	-3.47025	6.81594	98.7077	5.81e-06	5.93e-05
fecI	-5.02277	8.24995	452.828	1.15e-08	4.5e-06
fecR	-4.70605	7.26475	485.637	8.62e-09	4.5e-06
feoA	-5.17899	7.16728	67.8337	2.49e-05	0.000158562
feoC	-1.58557	5.60118	19.7999	0.00184812	0.00449304
fepA	-1.89875	7.56051	73.8383	1.8e-05	0.000126609
fepB	-2.44339	6.06752	107.289	4.18e-06	4.86e-05
fepC	-3.18468	5.6959	146.387	1.21e-06	2.58e-05
fepD	-2.78205	5.86086	214.796	2.53e-07	1.35e-05
fepE	-1.77242	3.4737	38.5349	0.000201042	0.000746753
fepG	-2.83326	5.24724	118.706	2.79e-06	3.85e-05
fes	-3.38265	6.2943	193.983	3.84e-07	1.57e-05
ffh	0.685027	8.45957	11.6032	0.00848948	0.0166578
fhlA	0.749563	4.35783	16.6553	0.00683115	0.0137903
fhuB	-1.01766	6.87587	8.97772	0.0160521	0.0291296
fhuC	-1.79952	6.77184	48.2179	8.95e-05	0.000399516
fhuD	-1.95386	6.82981	42.753	0.000138626	0.000556759
fhuE	-1.33841	5.0487	70.6161	2.14e-05	0.000143371
fhuF	-3.08495	9.24964	219.933	2.3e-07	1.27e-05
fimA	-1.66591	13.063	23.9728	0.00100951	0.00270469
fimD	0.861396	9.58322	11.5815	0.00853097	0.0167303
fimE	-1.33329	4.22581	51.2909	7.13e-05	0.000337185
fimF	-2.68274	8.04965	116.814	2.98e-06	3.99e-05
fimG	-2.61024	7.32167	141.954	1.36e-06	2.77e-05
fimH	-2.73783	7.5853	130.766	1.9e-06	3.16e-05
fimI	-1.61016	10.7222	29.8187	0.000489744	0.00150616
fiu	-3.20406	7.26464	74.5262	1.74e-05	0.000123208
fklB	-2.6567	8.1124	147.304	1.18e-06	2.58e-05
fkpB	-1.7065	7.46687	46.3826	0.000103142	0.000441244
fldA	-2.06608	8.14952	62.5419	3.39e-05	0.000195781
fldB	-1.17628	7.5162	45.9874	0.000106413	0.000452927
flgK	2.15979	3.19366	97.268	1.05e-05	8.67e-05
flgL	0.857407	3.97349	23.7083	0.00766428	0.0152668
flgM	-1.88259	2.89426	47.3394	0.000501228	0.00153362
flgN	-1.45917	4.06085	50.2235	7.7e-05	0.000355881
flhA	2.1549	3.45956	57.1758	4.76e-05	0.000250719
flhB	1.92021	2.05063	21.6515	0.0215199	0.037528
flhC	-1.52788	3.63035	47.619	9.37e-05	0.000413128
flhD	-1.34848	3.03396	30.9556	0.00573149	0.0119371
fliC	1.61827	6.00806	66.4784	2.69e-05	0.000168465
fliD	1.46815	2.56532	41.1047	0.0162574	0.0294131
fliR	1.33699	3.35868	31.2983	0.00160707	0.00397603
fnr	-1.11608	8.54648	11.1438	0.00942528	0.018289
focA	-3.43438	8.0197	65.7221	2.81e-05	0.000173128
focB	1.33758	4.70217	35.2759	0.000274485	0.000957248
folC	1.07354	7.5464	22.8775	0.00117346	0.00307339
folD	-3.13699	7.90612	153.239	1e-06	2.41e-05
folE	-3.38047	8.10594	350.636	3.35e-08	7.4e-06
folK	-2.05504	5.9982	38.9103	0.000194236	0.000727908
folX	-2.03822	6.84566	136.814	1.58e-06	2.93e-05
fpr	-0.673429	6.27268	12.155	0.0075132	0.0150014
frc	1.33556	2.70691	35.9736	0.0181621	0.0322753
frdA	-1.24808	7.96143	8.86428	0.0165393	0.0298589
frdB	-1.40049	6.4689	13.3703	0.00581046	0.012078
frdC	-2.06782	5.53504	39.5772	0.000182834	0.000698261
frdD	-2.45646	6.12795	50.3558	7.63e-05	0.000354123
frlC	1.12538	3.03594	21.1815	0.0190168	0.0336657
frlD	1.18098	4.01045	29.6178	0.000501092	0.00153362
frlR	-1.45762	4.71942	65.3955	2.86e-05	0.000175411
frmA	3.27032	8.65151	184.461	4.72e-07	1.7e-05
frmB	2.10491	7.19513	120.653	2.62e-06	3.76e-05
frmR	1.02068	6.45926	28.9422	0.00054172	0.00162904
fruA	3.61601	6.41778	381.192	2.37e-08	5.85e-06
fruB	5.42278	5.71258	25.4837	0.000827205	0.00229871
fruK	4.14585	5.40174	73.8929	1.79e-05	0.000126512
frvR	1.62559	3.32669	27.4117	0.000649922	0.00189474
fryA	2.44478	3.52535	118.951	2.77e-06	3.85e-05
fsaA	-0.706977	4.13138	10.5749	0.016719	0.0301187
ftnA	-1.08626	5.88577	11.9985	0.0077753	0.015444
ftp	1.01408	5.93838	21.0605	0.00152525	0.00380045
ftsA	1.47859	9.10846	67.4342	2.55e-05	0.000161224
ftsB	-1.27615	7.49512	49.6078	8.06e-05	0.000368106
ftsH	1.60595	10.5876	70.9286	2.1e-05	0.000141918
ftsI	1.74096	7.91531	91.0545	7.98e-06	7.35e-05
ftsK	2.03124	8.57631	99.3714	5.66e-06	5.85e-05
ftsN	-0.835205	7.12908	26.0773	0.000766866	0.00216215
ftsQ	0.795179	8.45107	21.3069	0.00147054	0.00369039
ftsX	1.0887	7.78293	32.9659	0.000347364	0.00115816
ftsY	1.446	8.64798	51.9522	6.8e-05	0.000326108
ftsZ	0.955271	9.87976	25.9946	0.000774942	0.00218199
fucI	1.15209	3.38081	16.9905	0.00551122	0.0115532
fucO	2.09496	4.19924	68.2517	2.43e-05	0.000157083
fumC	0.71281	6.03605	8.77734	0.0169252	0.0304509
fumD	-4.2189	5.7225	329.966	4.31e-08	7.87e-06
fumE	-0.766688	6.07966	19.6549	0.00189046	0.0045827
fur	-1.259	9.35028	37.0924	0.000230101	0.000831502
fusA	1.54345	13.6724	47.4759	9.47e-05	0.000416125
fxsA	-1.73943	4.27035	71.544	2.03e-05	0.000138359
gabD	1.20493	4.4264	14.4719	0.00466325	0.00996963
gadA	2.16721	7.66292	35.2343	0.00027562	0.000959304
gadB	1.6004	7.23324	25.598	0.000815148	0.00227085
gadC	1.26525	6.33836	27.3511	0.000654735	0.00190481
gadE	2.19178	9.25974	50.8151	7.38e-05	0.000345502
gadX	0.884937	8.43262	8.60923	0.0177038	0.0315945
galE	-1.20929	6.98126	32.5585	0.0003626	0.00119755
galR	0.592406	4.89822	7.31696	0.0254667	0.0434371
galS	-1.0843	3.90274	17.0299	0.00291472	0.00662595
galT	-0.909004	6.21322	15.0191	0.00419812	0.00910026
gapA	-1.57044	11.2261	42.4471	0.000142261	0.000568098
gapC	-0.736785	7.72208	11.0435	0.00964635	0.0186748
garD	1.91995	3.86316	44.9772	0.000115372	0.000482746
garK	1.81246	4.59971	86.389	9.8e-06	8.28e-05
garR	0.724244	3.87508	9.84458	0.0297162	0.0495584
gatC	1.67139	3.00906	15.1866	0.00406739	0.00883511
gatY	-2.42157	8.82122	93.6258	7.15e-06	6.85e-05
gatZ	-1.89164	7.25334	122.283	2.48e-06	3.71e-05
gcl	1.27597	2.95816	21.96	0.0109515	0.0207656
gcvH	-2.66343	8.87399	215.257	2.51e-07	1.35e-05
gcvP	-0.761138	8.57859	10.5036	0.0109537	0.0207656
gcvR	-2.16773	6.23438	43.5589	0.000129584	0.000526991
gdhA	1.07064	6.75331	14.387	0.00474109	0.0101103
gfcA	-1.24421	4.03359	44.5922	0.000119031	0.000494609
gfcC	1.12187	3.04275	20.5511	0.0190084	0.0336654
gfcD	1.84372	3.87737	85.3712	1.03e-05	8.57e-05
ghoS	-2.47687	3.10494	8.88569	0.016446	0.0297222
ghoT	-3.03162	3.1463	22.4912	0.00123907	0.00320525
ghrA	0.428666	5.89251	7.07641	0.0273539	0.0462801
ghrB	-0.584068	6.81389	14.4849	0.0046515	0.00995866
ghxP	0.581425	8.49108	8.68035	0.0173691	0.031067
glcA	1.39948	3.55551	32.1261	0.000379684	0.00124087
glcB	2.17259	6.69563	93.3829	7.22e-06	6.87e-05
glgB	1.74324	7.74698	117.814	2.88e-06	3.88e-05
glgP	1.4671	7.74632	55.213	5.42e-05	0.000277019
glgS	-2.51449	6.06751	94.9113	6.78e-06	6.56e-05
glgX	1.05144	6.79986	28.963	0.00054041	0.00162626
glmM	1.67125	9.12745	70.3516	2.17e-05	0.000144066
glnB	-2.35267	7.11405	154.455	9.7e-07	2.37e-05
glnD	0.627406	6.2608	10.6833	0.0104953	0.020065
glnE	2.11824	7.34719	165.501	7.34e-07	2.07e-05
glnK	-2.88771	7.33923	20.4966	0.00166023	0.00409549
glnL	-1.52326	6.99454	10.331	0.0114176	0.0215285
glnS	-0.714279	8.76351	8.98337	0.0160284	0.0291115
gloA	-3.55384	7.19043	184.159	4.75e-07	1.7e-05
gloB	-1.19379	5.08847	41.241	0.000157797	0.00061723
glpA	-2.21568	6.56856	6.93394	0.0285545	0.0480021
glpB	-2.98225	5.33484	16.4327	0.00323764	0.00727344
glpC	-2.64344	4.7938	19.656	0.00189015	0.0045827
glpE	-1.78755	7.71609	96.607	6.32e-06	6.27e-05
glpF	-2.15708	6.57834	65.3605	2.87e-05	0.000175513
glpK	-0.767442	8.17298	8.43612	0.0185528	0.0329
glpX	-1.51229	6.68654	54.7485	5.59e-05	0.000283818
glrK	1.98516	6.11975	92.5159	7.49e-06	7.04e-05
glrR	0.935641	5.58498	28.6439	0.000560948	0.00167012
glsA	2.3431	6.85054	59.9806	3.97e-05	0.000218186
gltA	-0.971324	9.5441	25.0094	0.000879688	0.00241225
gltB	2.10784	8.46633	21.4818	0.00143318	0.0036031
gltD	1.29264	8.1859	12.5478	0.00690222	0.0139181
gltI	-1.16079	6.90866	8.77851	0.0169199	0.0304509
gltJ	-1.7258	5.42884	25.2514	0.000852409	0.00235901
gltK	-1.95775	5.39079	45.3741	0.000111745	0.00047038
gltL	-1.74841	6.17384	41.7377	0.000151157	0.000597375
gltP	1.0998	7.46516	26.1281	0.000761965	0.00215248
gltS	1.65393	6.58131	28.2054	0.000590779	0.00174044
glvB	-1.75451	2.17372	46.9658	0.0220821	0.0383811
glxK	1.05549	4.19645	10.3188	0.0114513	0.0215823
glyS	1.06	9.61934	13.6024	0.00554197	0.0116041
gmhB	-0.767506	6.70778	25.7134	0.000803183	0.00224496
gmk	-1.13655	8.73692	24.7031	0.000915775	0.00248525
gmm	-1.18023	3.01406	10.5614	0.0150246	0.0275266
gnsA	-2.75925	6.8314	143.776	1.3e-06	2.67e-05
gnsB	-4.68626	8.28742	508.464	7.11e-09	4.5e-06
gntP	-1.11733	4.06445	22.9761	0.00115742	0.00303706
gntR	-1.60072	6.50442	51.3813	7.08e-05	0.000335752
gntT	1.04805	4.73183	35.1173	0.000278845	0.000966524
gntU	1.08247	4.69613	24.6269	0.000925045	0.00250555
gph	-1.09835	7.08575	32.4262	0.000367724	0.00120688
gpmA	-0.866891	10.8488	6.89232	0.0289177	0.048419
gpmM	-0.671133	8.61683	7.49377	0.0241825	0.0414656
gpsA	-1.29425	7.82236	38.3196	0.000205079	0.000759064
gpt	-2.46035	9.66653	38.4989	0.00020171	0.00074791
grcA	-4.89276	10.0552	38.6128	0.000199606	0.000742731
greB	-1.92659	5.10159	105.725	4.43e-06	5.04e-05
groS	-2.02845	8.2437	22.1264	0.00130521	0.00333731
grpE	-1.49419	8.8015	44.4701	0.000120221	0.000498566
grxA	-2.13902	4.98182	152.491	1.02e-06	2.43e-05
grxB	-3.04876	6.18525	281.447	8.33e-08	8.93e-06
grxC	-1.93168	7.50649	58.5641	4.35e-05	0.000234127
grxD	-3.15942	8.64225	132.36	1.81e-06	3.07e-05
gshA	0.997777	8.36811	25.3447	0.000842175	0.00233376
gsiA	2.31202	7.95554	60.963	3.74e-05	0.000209603
gsiC	-1.36409	5.04846	43.6652	0.000128446	0.000523884
gsiD	-2.11401	4.7889	99.3203	5.67e-06	5.85e-05
gsk	-1.08538	7.18978	12.1354	0.00754535	0.0150494
gspA	1.69933	3.5829	33.2892	0.000335834	0.00112597
gspB	-1.91333	3.45486	73.8139	1.8e-05	0.000126609
gspD	0.92207	3.96953	18.4425	0.00421317	0.00911985
gspG	-2.09905	2.17437	55.2877	0.00793771	0.0157294
gspL	1.14364	4.37174	38.5244	0.000201237	0.000746818
gss	-0.465568	7.089	6.88013	0.0290251	0.0485408
guaA	-1.93791	10.2853	11.8742	0.00799147	0.0157987
guaC	-1.68324	7.63761	15.7718	0.00364844	0.00807114
gudD	1.38394	4.01361	54.7029	5.61e-05	0.000284031
gudP	1.81577	2.45025	48.1243	0.0064067	0.0130844
gudX	1.41369	3.33547	55.2697	0.00102396	0.00273295
gyrA	1.18065	9.39753	26.5268	0.000724767	0.00206985
hcaD	1.06842	3.52179	33.0039	0.00611553	0.0125876
hcaE	0.608664	4.45395	8.36096	0.0233904	0.0402883
hchA	-0.730208	4.84663	17.9943	0.00247308	0.00573683
hcxA	1.03903	5.05765	31.2497	0.000417477	0.00133168
hcxB	0.752846	6.37987	17.7449	0.00257886	0.00593633
hdeA	-1.61395	11.0075	29.4164	0.000512798	0.00155807
hdeB	-1.85015	10.4196	41.8172	0.000150127	0.000594984
hdeD	-1.21832	8.37272	29.9446	0.000482794	0.00148805
hdhA	1.84175	6.69196	42.6954	0.000139302	0.000558403
helD	2.41405	7.26886	156.085	9.3e-07	2.34e-05
hemA	0.739318	7.81696	12.2579	0.00734679	0.0146901
hemB	-1.87592	7.89211	39.544	0.000183382	0.000699099
hemC	-1.83829	6.9494	68.8155	2.36e-05	0.000154565
hemD	-1.37113	6.36674	69.1961	2.31e-05	0.000152051
hemE	-0.689919	7.09582	11.5797	0.00853442	0.0167303
hemG	-1.00862	6.25495	43.1543	0.000134029	0.000541399
hemH	0.800953	5.96753	26.0275	0.000771715	0.00217436
hemL	0.552224	8.38679	9.61585	0.0136214	0.0252308
hflD	-3.17276	7.15335	102.026	5.1e-06	5.46e-05
hflX	1.0797	9.02746	36.3121	0.000247991	0.000882142
hfq	-0.745369	10.0536	15.6383	0.00373913	0.0082414
hha	-4.43813	8.27346	270.209	9.85e-08	9.56e-06
hicA	-2.1358	2.34919	32.2954	0.00315715	0.00711545
hicB	-0.88541	4.07426	27.7602	0.00437335	0.00943144
hipA	2.45451	4.61327	72.3291	1.95e-05	0.000133985
hisB	0.986366	5.72261	25.1595	0.000862641	0.00237325
hisD	0.673747	5.38765	9.14743	0.0153562	0.0280485
hisG	1.09022	6.09591	18.8117	0.00216212	0.00512588
hisI	0.652272	6.23854	17.2545	0.00280365	0.00641512
hisM	-0.893216	5.02416	26.725	0.000707118	0.00202771
hisS	0.643673	8.89398	9.31107	0.0147205	0.0270047
hns	-1.92812	10.5372	34.0155	0.000311611	0.00105913
hofM	0.998148	3.49783	17.7515	0.0109197	0.0207292
hofQ	1.35938	3.65057	53.1553	0.000310355	0.00105742
hokA	-2.47952	3.88115	64.9425	2.94e-05	0.000177392
hokB	-2.44193	3.73006	129.087	2e-06	3.24e-05
holC	-0.711804	5.73363	21.7792	0.00137228	0.00346244
holD	-1.99709	6.87817	53.1265	6.26e-05	0.000307406
holE	-1.59247	5.578	38.7945	0.000196304	0.000732394
hpf	-2.01317	7.62	111.353	3.6e-06	4.44e-05
hprR	1.45243	6.14085	28.3444	0.000581115	0.00171799
hprS	2.42907	6.06444	52.4724	6.55e-05	0.000318151
hpt	-2.01737	8.28918	87.3789	9.37e-06	8.05e-05
hrpA	2.21278	7.40694	105.787	4.42e-06	5.04e-05
hrpB	1.44435	6.91944	75.4453	1.66e-05	0.000119379
hscA	1.13911	9.20857	15.2465	0.00402186	0.0087634
hscC	1.53977	3.6544	63.6488	5.57e-05	0.000282715
hsdR	0.814493	6.61384	21.6473	0.00139889	0.00352323
hsdS	-0.94594	6.17884	13.526	0.00562863	0.0117641
hslJ	-1.95528	7.43587	118.498	2.81e-06	3.86e-05
hslR	-1.42585	5.88403	51.5576	6.99e-05	0.000332804
hslU	-0.787046	7.7437	10.5013	0.0109597	0.0207676
hslV	-1.88101	6.62123	75.5987	1.64e-05	0.000118857
hspQ	-1.64326	7.0748	87.4824	9.33e-06	8.04e-05
htpX	1.10868	8.20368	40.2972	0.000171438	0.000662567
htrE	2.69331	3.50071	66.016	2.76e-05	0.000171596
htrL	-1.5279	7.44559	25.6816	0.000806456	0.00224961
hupA	-2.19761	10.2653	38.6294	0.000199301	0.000742254
hupB	-2.86822	9.98279	117.974	2.86e-06	3.88e-05
hxpA	-1.36432	6.77258	45.3163	0.000112264	0.000472093
hxpB	-2.07908	5.36343	120.837	2.6e-06	3.76e-05
hyaA	1.61508	6.99616	25.9355	0.000780774	0.002194
hyaB	1.42402	6.31385	10.8844	0.0100104	0.0192818
hyaD	-1.04869	5.38002	32.5143	0.000364302	0.00120128
hyaE	-1.51679	4.88047	72.9207	1.89e-05	0.000131618
hyaF	-0.74155	5.17759	15.2931	0.00398688	0.00870977
hybC	0.823402	6.51573	19.2946	0.00200105	0.00480092
hybG	-1.88813	4.72031	104.828	4.58e-06	5.14e-05
hyfA	1.84619	2.18926	43.8536	0.0160352	0.0291115
hyfB	1.89214	2.86715	71.3572	0.000582979	0.00172108
hyfR	1.55718	3.31356	66.3846	0.000396704	0.00128196
hypA	-3.01958	2.54829	12.0164	0.00774466	0.0153977
hypB	-2.99616	4.80364	22.6554	0.00121065	0.00315504
hypC	-3.72595	3.60238	23.5576	0.0010681	0.00283813
hypT	0.685661	5.88408	13.3056	0.00588825	0.0122016
hyuA	1.32704	2.77874	32.5652	0.0150964	0.0276219
iaaA	1.90216	8.76717	22.0079	0.00132765	0.00338437
iap	1.83691	6.90921	120.283	2.65e-06	3.79e-05
ibaG	-1.92577	7.42186	87.5977	9.28e-06	8.02e-05
ibpA	-1.95553	4.59007	38.8286	0.000195692	0.00073206
ibpB	-2.41937	3.1017	47.9196	9.15e-05	0.000406983
icd	-0.659109	10.7259	7.69281	0.0228324	0.0394403
icdC	-4.05448	9.60354	206.85	2.96e-07	1.4e-05
idi	-0.827452	4.47617	21.6923	0.00192369	0.0046445
idnD	1.30521	2.81601	18.1384	0.0148709	0.0272568
idnR	0.871256	4.40841	14.4828	0.00465338	0.00995866
ihfA	-1.40369	9.43103	53.8703	5.94e-05	0.000295723
ihfB	-1.6401	9.08607	76.8812	1.54e-05	0.000113532
ileS	1.61138	9.70909	58.1435	4.47e-05	0.000239313
ilvA	1.55217	6.19048	71.2656	2.06e-05	0.000140217
ilvB	1.49625	5.49587	52.6987	6.45e-05	0.000314931
ilvC	1.5756	5.74963	32.8311	0.000352316	0.00117095
ilvD	2.34224	7.0544	118.335	2.83e-06	3.86e-05
ilvE	1.21828	6.66033	29.4025	0.000513617	0.00155904
ilvG	5.074	9.20422	207.542	2.92e-07	1.4e-05
ilvI	1.59893	5.57132	67.8768	2.49e-05	0.000158442
ilvM	2.89838	3.78156	135.024	1.67e-06	2.95e-05
ilvN	-0.768889	3.70091	11.2557	0.0294748	0.049195
ilvY	0.659991	4.83811	15.0009	0.00437312	0.00943144
infA	-4.78658	10.8743	252.715	1.3e-07	9.56e-06
infB	3.07581	11.9436	117.833	2.88e-06	3.88e-05
insA-1	4.27712	1.6505	11.1095	0.0140118	0.0258854
insA-2	-1.20363	4.77345	58.5313	4.36e-05	0.000234319
insA-3	-1.26208	4.72605	40.0897	0.00017463	0.000672429
insA-4	-1.87641	3.53338	8.33516	0.0190714	0.0337201
insA-7	-0.963134	4.9686	22.4116	0.00125314	0.00323568
insA9	3.52066	1.40335	19.1044	0.019647	0.0345777
insB-4	-1.91122	6.32984	134.829	1.68e-06	2.95e-05
insD-1	1.31356	4.88221	37.3143	0.000225308	0.000818789
insD-2	1.55804	4.96926	89.4844	8.54e-06	7.63e-05
insD-3	1.48107	4.95959	67.9217	2.48e-05	0.000158442
insD-4	1.47723	4.94279	74.7914	1.71e-05	0.000122402
insD-5	1.39039	4.91209	47.8061	9.23e-05	0.000409666
insD-6	1.40572	4.93048	47.6143	9.37e-05	0.000413128
insE-1	-1.61427	4.25778	22.3776	0.00125921	0.00324735
insE-2	-1.70102	4.25544	31.6692	0.000398833	0.00128489
insE-3	-1.81411	4.388	27.7849	0.000621245	0.00181871
insE-4	-1.59032	4.29568	18.7762	0.00217455	0.00514954
insE-5	-1.98373	4.2932	29.6812	0.000497479	0.00152548
insG	0.813993	5.21255	20.7308	0.00160245	0.00396694
insH-5	-4.3716	1.68652	68.7576	0.00136828	0.00345442
insH-6	2.10451	3.78579	65.1419	2.91e-05	0.000176734
insI-3	-4.04055	1.55559	8.10699	0.0268765	0.0455642
insJ	-1.48366	4.73599	17.8707	0.0025248	0.00583746
insN	1.89993	7.84646	124.359	2.32e-06	3.58e-05
insO	1.85993	5.20735	84.4233	1.07e-05	8.83e-05
insZ	1.15713	4.32553	43.6229	0.000128897	0.000525214
intB	2.709	7.73318	160.005	8.41e-07	2.2e-05
intD	1.09653	7.1248	30.2168	0.000468181	0.00145476
intF	1.45108	6.86377	54.5096	5.69e-05	0.000286063
intQ	2.36311	2.93437	28.924	0.000542866	0.00163131
intR	1.97768	3.64264	68.2453	2.43e-05	0.000157083
intS	1.99065	5.46066	71.6221	2.02e-05	0.000138005
iraM	-2.34302	6.68782	187.78	4.39e-07	1.66e-05
iraP	-2.03021	6.60887	26.7346	0.000706278	0.00202669
iscS	1.61168	10.5504	13.786	0.0053403	0.0112341
iscX	-2.73286	8.07852	92.1304	7.62e-06	7.11e-05
ispA	-1.98109	7.14363	99.6993	5.58e-06	5.84e-05
ispE	-0.611737	6.40583	13.0017	0.00627105	0.0128511
ispU	0.6309	9.0783	7.90697	0.0214831	0.037495
ivy	-0.937087	8.24568	15.248	0.00402069	0.0087634
katE	-1.19381	4.34866	38.1058	0.000209187	0.00077121
kbaY	1.39895	2.55611	14.0037	0.0217806	0.037904
kbp	-0.690403	6.72716	11.7214	0.00826761	0.0162757
kch	1.11205	5.43493	34.0796	0.000309578	0.00105563
kdgK	2.11687	7.06674	66.7105	2.66e-05	0.00016674
kdgR	1.21127	7.61683	37.5614	0.000220115	0.000802029
kdpC	-1.51262	4.51236	14.7292	0.00443697	0.00955392
kdpD	1.48412	5.9709	33.7785	0.000319272	0.00108147
kdpE	-1.14874	3.98328	35.8261	0.000431371	0.00136473
kdsB	-0.509373	7.57216	8.0774	0.02048	0.0359684
kdsD	0.466755	7.24556	9.36811	0.0145066	0.0266873
kduI	1.00279	3.67215	18.5828	0.00596297	0.0123219
kefB	1.61566	6.25622	65.2223	2.89e-05	0.000176162
kefC	1.92459	5.71332	128.34	2.05e-06	3.28e-05
kefF	-0.865471	4.41582	24.4054	0.00144772	0.0036375
kefG	-0.641641	5.9188	8.28994	0.0193096	0.0340552
lacZ	1.40402	6.51505	19.1275	0.00205505	0.00490804
lapB	1.59143	7.09991	99.5541	5.62e-06	5.85e-05
ldcA	0.543119	5.29419	7.18631	0.0264707	0.0449125
ldcC	1.64958	6.20213	92.8424	7.39e-06	6.98e-05
ldhA	-0.789476	5.7264	12.6821	0.00670754	0.013593
ldrA	-2.25844	3.87104	97.273	6.15e-06	6.2e-05
ldrC	-1.96335	3.79981	62.2547	3.45e-05	0.000197323
ldrD	-3.06885	3.05543	68.6269	2.38e-05	0.000155467
ldtA	0.893864	5.62903	30.712	0.000442973	0.00139554
ldtB	-1.08784	8.72779	15.5511	0.00379982	0.00835761
ldtC	-1.34547	4.74993	15.583	0.00377748	0.00831282
ldtD	1.85108	6.66479	114.999	3.17e-06	4.12e-05
ldtE	1.62237	5.37623	67.0186	2.61e-05	0.000164328
lepA	0.864426	8.72464	12.4322	0.00707539	0.0142083
leuA	3.00359	5.56878	100.162	5.48e-06	5.8e-05
leuB	2.30021	4.74761	72.399	1.94e-05	0.000133707
leuC	2.23352	4.98832	99.3356	5.66e-06	5.85e-05
leuD	0.932448	5.28369	31.0234	0.000427981	0.00135592
leuO	1.28655	3.74414	21.6762	0.00139301	0.00351052
leuS	1.49075	9.75667	40.1886	0.000173099	0.000667758
lfhA	1.90274	4.67052	68.3216	2.42e-05	0.00015692
lgoD	1.16859	2.79549	12.9316	0.0292093	0.0487712
lgt	-2.13197	6.73685	52.76	6.42e-05	0.000313942
ligA	2.76063	8.10496	118.915	2.78e-06	3.85e-05
ligB	1.59346	4.05684	67.8095	2.49e-05	0.000158562
lipA	-1.9551	8.0787	94.7286	6.83e-06	6.58e-05
lipB	-2.30121	6.48511	79.1297	1.38e-05	0.000105575
livF	1.80914	4.24776	59.5412	4.08e-05	0.000222528
livG	1.70998	3.86574	85.803	1.01e-05	8.44e-05
livH	2.11324	3.70298	85.8831	1e-05	8.42e-05
livJ	1.21382	5.58986	31.4211	0.000409731	0.00131295
livK	2.2734	4.63016	53.6715	6.02e-05	0.000298757
livM	1.976	4.11753	66.5769	2.68e-05	0.000167768
lldD	-1.82605	5.04758	50.2839	7.67e-05	0.0003556
lldP	-1.75902	5.9848	92.0788	7.63e-06	7.11e-05
lldR	-2.41123	5.26031	89.7394	8.44e-06	7.6e-05
lnt	-0.912772	6.62391	14.0817	0.00503443	0.0106816
lolA	-0.910755	7.15612	29.8597	0.00048747	0.00150136
lolB	-1.04151	6.37058	25.2181	0.000856098	0.0023661
lolD	-0.802705	6.26055	7.4908	0.0242034	0.0414846
lomR	2.0953	3.77212	57.582	4.63e-05	0.000245383
lon	1.2263	8.94179	30.2889	0.000464404	0.00144776
lpcA	-1.16136	7.61321	38.9917	0.000192798	0.000725755
lplA	-0.445312	5.31473	7.63157	0.0232375	0.0400906
lplT	1.22834	6.10736	47.4999	9.45e-05	0.00041591
lpoA	0.675162	6.68288	18.1075	0.00242686	0.00565461
lpp	-2.98434	13.1031	104.914	4.57e-06	5.14e-05
lptB	-0.474045	7.42878	6.89613	0.0288842	0.0483822
lptD	1.44057	9.16144	48.1023	9.03e-05	0.000402195
lptF	0.843647	8.11885	23.243	0.00111531	0.00294126
lptG	0.788292	7.88267	14.4518	0.00468155	0.0100037
lpxC	0.594355	10.9065	8.55516	0.0179636	0.0319768
lpxM	0.888166	6.84785	23.8936	0.00102036	0.00272681
lrhA	1.07071	7.01458	40.6716	0.000165858	0.000645756
lspA	-1.07502	7.32465	37.8305	0.000214627	0.000786779
lsrR	0.786485	3.68446	10.0043	0.028573	0.048014
ltaE	0.794665	6.31227	22.5707	0.00122519	0.00318111
luxS	-1.19683	8.17162	29.8243	0.000489435	0.00150616
lysA	1.35081	5.06826	26.3259	0.00074322	0.00210964
lysO	-2.11273	4.59108	63.1818	3.26e-05	0.000190205
lysP	-1.26158	6.3483	24.7113	0.000914786	0.00248525
lysS	-1.32137	8.90403	14.9907	0.00422084	0.00913067
lysU	-1.67428	8.56013	70.4193	2.16e-05	0.000143992
lyxK	1.23715	2.68518	10.6275	0.0290624	0.0485451
maa	-2.04091	6.65653	71.0586	2.09e-05	0.000141561
macB	1.00296	5.07794	36.5535	0.000242277	0.00086548
maeB	0.921839	7.1849	27.2758	0.000660778	0.00191451
mak	0.711112	5.92755	14.6849	0.00447493	0.00962087
malE	-2.10042	3.00937	26.5393	0.000723641	0.00206804
malI	0.981718	4.21865	26.1645	0.000869312	0.00238691
malK	-2.45684	2.96237	15.2812	0.00399573	0.00872457
malM	0.840683	4.38933	16.0611	0.0034611	0.00771559
malP	1.59809	6.17422	68.0269	2.46e-05	0.000158312
malQ	2.32688	6.49216	192.425	3.97e-07	1.59e-05
malS	1.13408	3.77865	37.0176	0.00130873	0.00334426
malX	0.847325	3.75805	15.211	0.0150471	0.0275557
malY	1.23114	4.90854	29.0753	0.0005334	0.00160798
malZ	1.10819	5.43837	47.2456	9.64e-05	0.000418791
manA	-0.503106	6.23885	7.37402	0.0250431	0.0428364
manX	-1.92632	7.64558	37.1261	0.000229365	0.000829943
manY	-1.79615	7.38193	35.2161	0.000276121	0.00096025
manZ	-2.0725	7.44381	38.8052	0.000196113	0.000732394
map	-0.95428	8.89521	24.4768	0.000943623	0.00255423
marA	0.941223	6.36663	9.21976	0.0150711	0.0275876
mazE	-1.20491	6.36933	35.4312	0.000270298	0.000948641
mazG	0.829833	7.09452	21.2996	0.00147213	0.00369218
mcbA	-2.85908	3.44362	130.2	1.93e-06	3.18e-05
mcbR	2.26208	4.93136	78.1908	1.44e-05	0.000108669
mdaB	-1.82809	5.95746	54.6844	5.62e-05	0.000284031
mdfA	1.14939	6.32166	28.6547	0.00056024	0.0016692
mdh	1.08147	10.5209	17.1041	0.00287743	0.00655892
mdlA	1.22036	5.78584	28.6254	0.000562168	0.00167257
mdlB	1.24536	5.65456	26.2764	0.000747859	0.00211851
mdtB	0.826978	4.32311	11.0337	0.00966822	0.0186913
mdtF	1.06367	7.27913	22.7787	0.00118983	0.00311044
mdtI	-2.18985	4.50629	61.2335	3.68e-05	0.000206965
mdtJ	-2.52936	4.7199	75.9706	1.61e-05	0.000117231
mdtK	1.27801	6.45584	31.8242	0.000392205	0.00127036
mdtO	1.52742	2.94034	37.9164	0.00300286	0.00681157
melA	1.31419	3.87511	56.305	0.000133509	0.00053982
melR	-1.17519	4.19538	25.9154	0.000782764	0.00219705
menB	-0.992635	6.87491	23.0986	0.00113786	0.0029876
menD	-1.05329	6.28164	18.3088	0.00234727	0.00549352
menH	-2.20655	5.23515	70.3828	2.16e-05	0.00014405
menI	-1.05092	6.26201	34.8587	0.000286137	0.000986914
mepA	-0.648603	6.36117	8.36219	0.0189308	0.0335562
mepH	-1.40213	5.14464	50.8729	7.35e-05	0.000344437
mepM	2.33197	7.32447	107.613	4.13e-06	4.82e-05
mepS	-0.868935	8.76007	19.5881	0.00191038	0.00462032
metA	1.69542	3.42041	59.9482	6.81e-05	0.000326108
metB	0.880174	5.95696	25.0208	0.000878376	0.00241023
metC	0.773931	5.14227	19.4777	0.00194387	0.00468246
metE	1.88892	4.76536	77.582	1.49e-05	0.000110983
metH	2.1478	6.84329	106.876	4.24e-06	4.9e-05
metK	-1.13825	7.41433	35.1642	0.000277547	0.000963614
metL	1.67514	7.1996	86.4495	9.77e-06	8.27e-05
metN	1.34164	5.62602	22.3579	0.00126274	0.00325445
metQ	-0.650536	7.00173	9.79356	0.0130275	0.0242915
metR	-1.35951	4.76083	57.4732	4.66e-05	0.000246818
mfd	0.995169	6.55269	37.0482	0.00023107	0.000833242
mglB	-1.66146	5.94604	21.9478	0.0013392	0.00340144
mglC	-1.15394	4.7465	11.3443	0.00900179	0.0175727
mgrB	-0.878051	6.6779	25.9455	0.000779785	0.00219269
mgsA	-1.78258	7.23143	86.7205	9.65e-06	8.22e-05
mgtA	7.63741	13.4316	754.294	1.36e-09	4.5e-06
mgtS	6.48307	5.05364	121.281	2.57e-06	3.75e-05
mhpA	2.21811	4.72078	104.877	4.57e-06	5.14e-05
mhpB	1.17858	3.85245	33.3674	0.000590089	0.00173963
mhpR	0.858716	7.45799	27.5433	0.000639631	0.00186733
miaA	0.985859	9.39731	28.4947	0.000570884	0.00169079
miaB	1.01973	8.25188	20.3325	0.00170228	0.00417958
minE	-1.64048	7.09093	96.7054	6.3e-06	6.27e-05
mioC	-0.998161	8.04347	10.7737	0.0102738	0.0197259
mlaA	1.0587	7.83956	15.8108	0.00362246	0.00802709
mlaB	-0.930822	7.93925	27.0451	0.000679714	0.00195849
mlaD	0.522698	7.54525	9.04925	0.0157541	0.0286631
mlaE	0.975817	8.05726	28.5652	0.000566163	0.0016797
mlaF	0.883792	8.62757	23.1145	0.00113535	0.00298285
mlc	0.723933	5.53312	17.6649	0.00261393	0.00600719
mliC	-2.18216	4.79404	139.497	1.46e-06	2.83e-05
mltA	1.09449	7.6631	36.5972	0.00024126	0.000862875
mltC	-0.830979	5.77652	20.2361	0.00172759	0.004222
mltF	2.16085	5.98692	102.873	4.93e-06	5.37e-05
mltG	0.521383	6.18336	6.94305	0.0284758	0.0478891
mmuM	1.24269	5.5678	50.5949	7.5e-05	0.000350307
mmuP	1.85838	4.26267	106.256	4.34e-06	5e-05
mngB	2.64928	4.87788	123.183	2.41e-06	3.68e-05
mnmA	-0.98812	7.67204	9.04062	0.0157897	0.028703
mnmC	1.63034	6.17861	85.0491	1.04e-05	8.64e-05
mnmG	1.15609	8.7117	14.3131	0.00481007	0.0102522
mntH	0.973661	6.92241	15.7633	0.00365409	0.00807939
mntR	-0.728347	7.1597	12.6337	0.00677688	0.0136939
mntS	-4.85447	6.37195	172.436	6.21e-07	1.91e-05
moaD	-1.3947	5.11418	52.5226	6.53e-05	0.00031776
mocA	-1.32316	3.17038	15.3734	0.00392745	0.00858888
modA	0.863943	5.39793	27.0863	0.000676284	0.00195129
modB	0.884327	5.20131	28.6551	0.000560214	0.0016692
modC	1.5145	5.694	78.7138	1.41e-05	0.000107027
modE	-1.1573	5.5602	43.5321	0.000129872	0.000527287
modF	1.01947	5.589	24.877	0.000895063	0.00244643
mog	-0.967728	6.52842	17.3699	0.00274866	0.00629614
mokB	-3.01265	4.79936	192.055	4e-07	1.59e-05
mokC	-1.76565	3.69916	80.234	1.31e-05	0.000102308
mpl	1.01984	8.72212	27.8476	0.000616577	0.00181009
mppA	2.53611	6.76179	177.862	5.47e-07	1.8e-05
mprA	-1.56307	6.77292	74.6399	1.73e-05	0.000123152
mraY	-1.30893	6.90683	36.5314	0.000242793	0.000866587
mrcA	2.60965	7.98184	109.927	3.79e-06	4.57e-05
mrcB	1.23398	8.06722	45.3951	0.000111556	0.000470058
mrdA	1.08647	7.93644	13.9883	0.00512865	0.0108596
mreD	-1.0213	7.36706	8.30483	0.0192307	0.0339875
mrr	0.830802	6.25771	15.8095	0.0036233	0.00802709
msbA	0.840989	7.87893	9.622	0.0136003	0.0252139
mscK	2.00991	8.1593	71.0169	2.09e-05	0.000141652
mscL	-1.66205	7.03674	57.0423	4.8e-05	0.000252291
mscM	0.706503	5.79996	13.3204	0.00587031	0.0121844
mscS	1.42793	8.45296	26.4751	0.000729464	0.00208185
msrA	-0.874651	5.07503	10.256	0.0116267	0.0218932
msrB	-2.14622	7.88755	144.933	1.25e-06	2.65e-05
msrC	-0.807561	7.98791	16.972	0.00294422	0.00668576
msrP	0.68111	4.34313	10.6774	0.0136353	0.0252455
msyB	0.999513	7.0461	25.1599	0.000862597	0.00237325
mtgA	2.56367	5.25521	100.625	5.38e-06	5.71e-05
mtlA	1.72171	6.51285	63.4434	3.21e-05	0.000187771
mtn	-2.90275	8.28363	113.306	3.36e-06	4.25e-05
mtr	0.611769	5.06985	10.7372	0.0103626	0.0198691
mukB	2.18865	8.804	89.8306	8.41e-06	7.59e-05
mukF	1.69813	7.85927	102.26	5.05e-06	5.44e-05
murD	-0.811314	7.46773	17.667	0.00261302	0.00600719
murF	-0.685801	7.40805	8.01006	0.0208692	0.0365755
murI	-2.65576	6.9846	121.522	2.55e-06	3.75e-05
murQ	-0.923812	3.50464	25.2854	0.017222	0.0309054
murR	1.20129	3.81775	12.7477	0.00661487	0.0134442
mutH	0.821428	4.62914	18.0969	0.00243115	0.00565615
mutL	1.24805	7.6687	31.5636	0.000403429	0.00129572
mutS	0.977948	7.01252	19.0333	0.00208627	0.00497131
mutT	-2.33223	5.36751	64.2614	3.06e-05	0.000180876
mutY	-1.01958	6.2942	24.7057	0.000915465	0.00248525
mzrA	-1.45273	6.32858	54.033	5.87e-05	0.000293118
nac	-1.37396	5.73703	9.47754	0.014107	0.0260384
nadA	1.11437	4.09477	19.3316	0.00198934	0.00477554
nadB	1.10149	4.18885	21.9107	0.00134641	0.00341561
nadC	-2.69286	6.29748	185.806	4.58e-07	1.7e-05
nadD	-0.989512	6.56456	21.988	0.00133146	0.00338999
nadE	-0.839376	7.24659	11.854	0.00802738	0.0158547
nadK	-0.802516	5.60783	23.6561	0.00105383	0.00280375
nagA	0.735019	6.81409	13.4187	0.00575322	0.0119709
nagE	1.71536	7.35417	31.6788	0.000398416	0.00128489
nagK	-0.805706	6.6778	18.2987	0.00235119	0.00549963
nagZ	0.814808	6.84224	29.4879	0.000508601	0.00154986
nanA	-1.1654	3.52354	15.2196	0.0040422	0.00878948
nanK	1.34078	4.20093	31.1015	0.000424317	0.00134736
nanM	2.47134	5.17605	52.2486	6.66e-05	0.000321745
nanR	-0.798338	6.16069	12.8651	0.00645306	0.0131535
nanS	2.00611	3.88373	30.5698	0.000450037	0.00141195
nanT	1.38473	3.00543	31.1477	0.00520302	0.0109894
napA	0.915658	6.77193	8.23787	0.0195884	0.0344891
napB	-0.983583	4.52792	22.1512	0.00130058	0.00332951
napD	-3.16448	5.10339	41.3605	0.000156167	0.000613138
napF	-3.12264	5.72393	36.3001	0.000248279	0.00088242
narK	-3.13279	5.48524	8.08421	0.0204412	0.0359153
narP	0.863214	7.2452	21.1823	0.00149788	0.00374559
narQ	0.973719	5.41793	23.1727	0.00112622	0.00296443
narX	0.828983	5.76562	7.75182	0.0224503	0.0388761
narZ	1.84367	2.99938	66.1279	0.000358934	0.00118918
ndk	-2.8815	8.63316	93.5636	7.17e-06	6.85e-05
nei	-0.522184	5.57378	7.53768	0.0238763	0.0410258
nemA	-0.979374	5.18213	16.7318	0.00307066	0.00695034
nemR	-0.941339	3.97042	14.2114	0.00490713	0.0104273
nepI	-0.936972	5.21069	21.1475	0.00150563	0.0037605
nfeF	-1.49148	5.39311	58.2137	4.45e-05	0.000238546
nfeR	-0.666648	5.75448	9.75031	0.0131691	0.0245082
nfi	-1.35645	6.2749	27.1706	0.000669331	0.00193388
nfo	-0.715439	5.47721	9.40484	0.0143709	0.0264675
nfrA	2.21977	5.49066	78.1861	1.44e-05	0.000108669
nfrB	2.60298	5.00612	151.752	1.04e-06	2.45e-05
nfsA	0.744762	6.00256	18.9517	0.00211379	0.00502265
nfsB	-2.14496	7.70613	69.5514	2.26e-05	0.000149335
nfuA	-3.00943	8.37205	64.2826	3.06e-05	0.000180876
nhaA	0.817453	7.30259	19.433	0.00195766	0.00471296
nhaR	1.04431	6.71964	33.7723	0.000319473	0.00108147
nikA	-2.56059	4.86857	19.0069	0.00209513	0.00498674
nikB	-4.01711	4.38499	37.9722	0.000211806	0.000779156
nikC	-3.48544	3.85287	34.0365	0.000310943	0.00105771
nikD	-2.26985	3.94033	22.5426	0.00123007	0.00318983
nikE	-0.979472	3.82359	9.20115	0.0151438	0.0276967
nikR	-2.06519	4.84661	68.1933	2.44e-05	0.000157083
nirD	-2.60235	3.63055	11.6681	0.00836673	0.0164477
nlpA	1.72144	7.46413	12.4221	0.00709067	0.0142186
nlpD	1.41362	10.2052	38.9322	0.000193848	0.000727753
nlpE	0.440619	6.44134	6.92337	0.0286462	0.0480793
nmpC	-2.86351	6.86315	121.141	2.58e-06	3.76e-05
nnr	2.19196	6.83568	131.646	1.85e-06	3.13e-05
norR	2.32314	5.55081	79.0662	1.38e-05	0.000105575
norV	1.17333	3.41269	26.5117	0.00421367	0.00911985
npr	-3.82778	6.344	257.496	1.2e-07	9.56e-06
nrdA	-2.43673	8.89886	22.4023	0.0012548	0.00323796
nrdB	-1.94276	8.27261	33.6389	0.000323891	0.0010929
nrdD	-3.28495	6.94915	251.775	1.32e-07	9.56e-06
nrdE	-1.6277	4.29375	17.991	0.00247444	0.00573683
nrdF	-3.24359	3.90455	23.9582	0.0010115	0.0027083
nrdG	-3.37855	5.27691	238.804	1.64e-07	1.09e-05
nrdH	-4.71362	3.90253	70.753	2.12e-05	0.000142538
nrdI	-3.80628	3.99947	90.6458	8.12e-06	7.45e-05
nrdR	-2.28224	7.22075	142.302	1.35e-06	2.76e-05
nrfB	-2.21055	3.63827	7.77146	0.0223249	0.0387069
nrfC	-2.22626	2.74677	8.86992	0.0165147	0.0298272
nth	-2.84302	4.75813	139.618	1.46e-06	2.83e-05
nudE	-1.11071	8.09096	32.0223	0.000383931	0.00125128
nudG	-1.38819	3.93925	43.719	0.000127875	0.000523079
nudI	-1.72542	4.05077	88.4632	8.93e-06	7.81e-05
nudJ	-2.97068	5.49955	85.0911	1.04e-05	8.64e-05
nudK	-1.68549	5.64709	53.5619	6.07e-05	0.000299975
nudL	-1.51135	4.97188	76.2931	1.59e-05	0.000116134
nuoA	-2.30985	8.00681	162.64	7.87e-07	2.12e-05
nuoB	-1.10709	9.0125	37.0707	0.000230577	0.000832177
nuoC	-0.829201	8.85639	11.0722	0.00958229	0.0185765
nuoE	-2.48199	8.49842	118.358	2.83e-06	3.86e-05
nuoF	-1.74749	8.54008	64.568	3.01e-05	0.000179234
nuoG	-1.19739	8.9217	24.9314	0.000888714	0.00243066
nuoH	-2.7838	8.25072	116.511	3.01e-06	4.01e-05
nuoI	-3.97343	8.07524	183.443	4.83e-07	1.7e-05
nuoJ	-3.8232	8.27166	167.344	7.01e-07	2.05e-05
nuoK	-4.99844	7.36805	288.606	7.5e-08	8.59e-06
nuoL	-2.59483	8.38472	91.8288	7.72e-06	7.17e-05
nuoM	-3.79831	8.00247	122.292	2.48e-06	3.71e-05
nuoN	-2.62197	8.04836	52.1535	6.7e-05	0.000322812
nupC	-2.10214	6.55458	43.2317	0.000133164	0.000538941
nusA	1.88773	10.795	43.0089	0.000135673	0.000547513
nusB	-2.84635	8.5773	95.4415	6.63e-06	6.48e-05
obgE	1.69742	10.0272	31.3029	0.000415051	0.00132595
ogrK	-1.2098	4.46109	22.6507	0.00121145	0.00315517
ogt	-1.89471	4.59351	78.6729	1.41e-05	0.000107049
ompA	1.79592	13.9853	52.1794	6.69e-05	0.000322587
ompC	1.68012	14.1619	60.0685	3.95e-05	0.00021781
ompF	2.26086	10.9369	47.5629	9.41e-05	0.000414331
ompG	2.57652	2.34635	17.9277	0.0025008	0.00578517
ompN	2.0652	3.39809	77.8921	1.46e-05	0.00010987
ompT	2.03207	11.9025	49.4846	8.14e-05	0.000370686
ompW	-2.44042	6.37659	36.0357	0.000254737	0.000900041
ompX	-1.10608	12.9372	19.9875	0.00179504	0.00437158
opgB	2.21719	7.9698	108.32	4.02e-06	4.73e-05
opgD	1.50059	6.74233	79.6184	1.35e-05	0.000104709
opgE	0.873244	6.47859	9.62323	0.0135961	0.0252139
opgG	-0.872961	7.40387	19.1061	0.00206207	0.00492203
oppA	1.44533	11.0749	60.2395	3.91e-05	0.00021637
oppD	-1.00988	8.83863	20.2548	0.00172265	0.00421482
oppF	-1.26346	8.97336	42.616	0.000140239	0.000561091
orn	-0.91257	6.7937	12.9585	0.00632788	0.0129423
ortT	-1.66009	3.98574	48.6998	8.63e-05	0.000389332
osmB	-2.14157	8.17589	75.5646	1.65e-05	0.000118857
osmE	-1.60044	6.49495	79.0792	1.38e-05	0.000105575
osmY	0.784163	9.49705	13.2865	0.00591143	0.0122395
otsA	1.20893	5.83709	46.5005	0.000102192	0.000437622
otsB	0.59362	5.4664	12.4227	0.00708984	0.0142186
oxc	2.32442	3.30215	96.2797	6.41e-06	6.32e-05
oxyR	-0.453812	7.66425	8.64504	0.0175342	0.0313354
paaK	1.13581	4.40697	35.2884	0.000274147	0.000957248
paaX	0.633418	4.97289	14.2872	0.00483458	0.010294
paaY	0.598218	5.04869	9.93571	0.0125756	0.0235534
pabA	-0.777231	5.54602	8.642	0.0175486	0.0313442
pabB	0.819265	5.5211	21.83	0.00136222	0.00344801
pabC	1.07375	6.45355	31.1626	0.00042148	0.00133998
pal	-1.82586	11.1008	64.4121	3.03e-05	0.000180034
panB	-1.1334	7.99586	29.6876	0.000497113	0.00152547
panD	-4.05542	9.21819	319.493	4.93e-08	8.28e-06
panE	0.881358	6.75431	32.122	0.000379851	0.00124087
panZ	-1.3876	5.41667	57.2122	4.75e-05	0.000250435
paoC	1.29447	3.36093	33.3728	0.00218172	0.0051607
parC	1.82721	8.00403	90.452	8.19e-06	7.46e-05
parE	0.956178	7.98506	22.0399	0.00132154	0.00337291
patD	0.92103	4.15049	17.2133	0.0028236	0.00645373
pbpC	1.30084	4.78215	38.1607	0.000208121	0.000768969
pbpG	-0.737086	6.04947	18.2624	0.00236533	0.00552042
pcm	-0.890956	7.13657	26.2974	0.000745885	0.00211435
pdeA	2.85251	6.53864	224.928	2.1e-07	1.27e-05
pdeB	0.944707	5.70202	30.8585	0.000435841	0.0013777
pdeC	0.968683	4.29229	28.0031	0.000723305	0.00206804
pdeD	1.40036	3.44066	43.4693	0.000664295	0.00192166
pdeF	1.06393	3.69285	20.3372	0.0033839	0.00756157
pdeG	1.47058	3.60208	28.6001	0.000563842	0.00167518
pdeI	0.465262	6.04973	7.68161	0.0229058	0.0395346
pdeL	4.11633	9.03903	130.632	1.91e-06	3.16e-05
pdeN	1.23909	5.32991	26.258	0.00074959	0.00212199
pdeR	2.4678	5.82547	149.422	1.11e-06	2.52e-05
pdhR	-1.0753	7.39197	8.05593	0.0206031	0.0361242
pdxA	-0.91811	7.38638	20.8019	0.0015854	0.00392936
pdxH	-1.51657	6.20086	28.4446	0.000574272	0.00169896
pdxK	-1.27913	5.83043	35.577	0.00026644	0.000937449
pdxY	-1.18497	6.61828	21.9682	0.00133527	0.00339486
pepA	2.10018	8.66014	107.731	4.11e-06	4.81e-05
pepD	-0.71536	9.76708	13.5475	0.00560398	0.0117184
pepE	-1.94458	5.05258	19.5991	0.00190709	0.00461503
pepN	0.676313	8.12763	15.1766	0.00407505	0.00884718
pepT	1.1966	7.02617	11.297	0.00909947	0.017714
pfkB	-1.85465	6.23079	60.4105	3.87e-05	0.000214919
pflA	-1.66399	6.59172	76.9853	1.53e-05	0.000113532
pflB	-0.745899	9.83153	7.92198	0.0213924	0.0373522
pflC	1.31151	2.82286	29.4037	0.014202	0.0261908
pflD	1.3734	3.54884	50.3478	0.000475276	0.00146812
pgaA	3.80731	5.83385	107.96	4.08e-06	4.78e-05
pgaB	2.4161	3.36989	86.3221	9.83e-06	8.29e-05
pgaC	1.89522	3.43955	30.35	0.000461232	0.00144277
pgk	-1.66974	10.0573	31.4	0.000410672	0.00131396
pgm	0.919228	8.63872	24.0183	0.00100333	0.0026924
pgpA	-1.83335	6.96089	51.9929	6.78e-05	0.000326108
pgrR	1.25409	4.85518	24.7953	0.000904723	0.00246641
pgsA	-1.21989	6.064	48.3333	8.87e-05	0.000397294
pheA	0.856971	6.46955	22.5847	0.00122277	0.00317679
pheT	1.91984	9.46039	70.5115	2.15e-05	0.000143949
phnE	1.271	2.9065	8.83469	0.0166694	0.0300521
phoA	2.73377	6.88572	11.8899	0.00796372	0.0157586
phoB	2.56752	6.57295	7.42454	0.0246755	0.0422419
phoE	3.79922	8.19238	16.3592	0.00328038	0.00736159
phoQ	1.63546	7.44716	66.3338	2.71e-05	0.000169364
phoR	3.47474	6.67564	13.8794	0.00524123	0.0110479
pinR	1.74254	5.08535	12.8015	0.00654011	0.0133115
pitA	1.38979	9.30392	35.0865	0.000279701	0.000968692
pitB	1.22007	3.06139	37.053	0.010621	0.0202353
plaP	1.85677	8.64494	51.9624	6.79e-05	0.000326108
pliG	0.564912	4.78678	8.12871	0.0201895	0.0354879
plsX	1.13674	9.01946	14.7168	0.00444761	0.00956703
pmbA	0.61135	7.49187	15.155	0.00409161	0.00887853
pmrR	2.73939	3.01546	24.7781	0.000906778	0.00246881
pncA	-1.9408	6.02978	74.2067	1.77e-05	0.000124884
pnp	1.94634	11.196	58.1245	4.47e-05	0.000239313
pntA	2.01148	7.11105	75.9863	1.61e-05	0.000117231
pntB	0.925129	6.92211	33.9501	0.0003137	0.0010645
pnuC	0.773333	4.71558	15.8288	0.00361057	0.00801267
polA	1.45965	7.82195	58.0578	4.49e-05	0.000239432
potA	-1.68548	7.12853	33.0275	0.000345131	0.00115163
potB	-2.27652	6.52859	37.86	0.000214036	0.000785985
potC	-1.76742	6.10536	30.1051	0.000474115	0.0014656
potE	2.73793	4.70181	92.5575	7.48e-06	7.04e-05
potF	1.86492	6.35587	87.9445	9.14e-06	7.91e-05
potG	1.28787	4.88268	48.6277	8.68e-05	0.000390615
poxB	1.02865	5.79935	35.3895	0.000271416	0.000950543
ppa	-3.16958	10.964	109.12	3.91e-06	4.65e-05
ppdB	0.986533	3.36422	19.2961	0.0170331	0.0305927
pphA	0.994872	4.79236	30.2383	0.00046705	0.00145294
pphC	1.44565	2.65401	20.1679	0.0132192	0.0245834
ppiA	-3.19218	7.79939	154.789	9.62e-07	2.36e-05
ppiB	-1.49886	9.53604	30.5971	0.000448673	0.00140873
ppiC	-5.1712	8.42618	303.894	6.06e-08	8.55e-06
ppiD	1.45054	9.42389	64.5041	3.02e-05	0.000179314
ppnN	-1.40341	6.34392	54.0716	5.86e-05	0.000293036
ppnP	-3.74172	7.70906	314.273	5.27e-08	8.32e-06
pppA	-1.16627	4.59865	20.3172	0.00170627	0.00418449
ppsR	-2.16082	4.64022	71.8348	2e-05	0.000136888
pptA	-2.07393	3.03313	52.4927	6.54e-05	0.000318063
ppx	-0.772856	6.33394	14.6765	0.00448221	0.0096316
pqiA	0.865867	6.13829	15.5139	0.00382613	0.00841108
pqiB	0.809857	6.544	13.2696	0.00593199	0.01227
pqiC	-1.39192	6.11007	40.7069	0.000165343	0.000644348
prc	1.94071	9.77786	103.014	4.91e-06	5.35e-05
preA	1.60981	3.57738	55.9215	5.17e-05	0.000265444
preT	1.33103	2.85998	26.8419	0.0114072	0.0215185
prfB	-1.44057	8.70338	22.5257	0.00123301	0.00319218
prmA	-1.06341	6.78837	17.8513	0.00253306	0.00585071
proA	1.15168	8.80419	40.0604	0.000175086	0.000673566
proB	1.10376	8.89161	30.7191	0.000442623	0.00139554
proC	-0.907583	5.49253	17.0748	0.00289208	0.00658159
proP	2.21791	9.335	68.3952	2.41e-05	0.000156579
proV	1.55044	5.88907	13.4349	0.00573411	0.0119371
prpB	1.08507	3.03277	22.8184	0.0234473	0.0403531
prpE	2.71068	4.51606	120.049	2.67e-06	3.81e-05
prpR	1.33177	4.22654	56.9655	4.82e-05	0.000252935
prs	-1.89518	9.60663	41.6828	0.000151874	0.000599644
psd	-1.25524	7.02851	39.2437	0.000188429	0.000713358
psiE	-1.48107	3.74624	21.9146	0.00134565	0.00341561
pspA	0.704291	6.58062	7.69675	0.0228066	0.039412
pspE	-2.29794	6.07565	104.455	4.65e-06	5.2e-05
pspF	1.88567	4.44462	54.2571	5.79e-05	0.000290013
pspG	-1.63911	3.30747	22.5519	0.00122845	0.0031876
pstA	1.60629	6.78631	10.6986	0.0104575	0.0200055
pstB	1.47313	7.3736	10.052	0.0122205	0.0229297
pstC	2.25024	7.33749	11.0514	0.00962869	0.0186492
pstS	3.97743	9.27693	15.4034	0.00390551	0.00854979
psuK	2.21009	2.47059	36.3171	0.00126772	0.00326263
psuT	1.3239	3.49188	48.8739	0.000955699	0.00257861
ptrA	1.84907	6.7281	87.0845	9.49e-06	8.12e-05
ptrB	0.752526	4.88171	11.8478	0.0080383	0.0158688
ptsA	1.38838	2.578	22.3916	0.0214932	0.0374971
ptsG	-0.999309	8.94231	11.8966	0.00795194	0.0157427
ptsH	-2.83133	9.24844	67.4972	2.54e-05	0.000160893
ptsN	-2.37059	7.25437	139.821	1.45e-06	2.83e-05
purA	-2.10438	10.4558	99.5078	5.63e-06	5.85e-05
purB	-4.27709	8.26647	183.845	4.78e-07	1.7e-05
purC	-2.5196	9.81859	66.0033	2.77e-05	0.000171596
purD	-3.18506	9.92973	81.6454	1.22e-05	9.8e-05
purE	-3.16291	8.98692	96.5805	6.33e-06	6.27e-05
purF	-0.783175	9.18361	7.50551	0.0241002	0.0413582
purH	-3.34106	9.80249	84.3133	1.08e-05	8.84e-05
purK	-1.45266	8.92128	22.5287	0.0012325	0.00319218
purM	-1.15143	9.60311	15.4133	0.00389836	0.0085398
purN	-2.1098	8.46818	50.2131	7.71e-05	0.000355881
purT	-1.66984	8.17933	31.9634	0.000386372	0.00125534
purU	-0.606656	7.55477	10.5581	0.0108121	0.0205434
putA	1.51229	6.87094	31.3847	0.000411359	0.00131516
putP	1.01556	6.91191	38.1011	0.000209279	0.00077121
puuB	-3.0561	4.22898	127.51	2.1e-06	3.35e-05
puuC	-1.5644	4.87629	61.1608	3.69e-05	0.000207608
puuD	-1.19467	6.66544	22.4818	0.00124072	0.00320754
puuE	-2.07428	4.259	86.5496	9.73e-06	8.25e-05
puuP	-1.56101	4.05308	81.1583	1.25e-05	9.94e-05
puuR	-1.18844	6.57243	35.2948	0.000273972	0.000957248
pxpB	0.639969	7.10236	8.83343	0.016675	0.0300521
pxpC	1.05905	7.17504	30.9509	0.000431412	0.00136473
pykF	-2.18763	8.93259	25.914	0.000782905	0.00219705
pyrC	-1.64372	7.07496	63.7633	3.15e-05	0.000185254
pyrE	-1.76466	6.94803	26.9715	0.000685898	0.0019736
pyrF	1.52559	7.48545	43.6671	0.000128426	0.000523884
pyrG	1.08924	9.73493	21.0189	0.00153473	0.0038173
qmcA	1.12264	5.77563	37.2857	0.00022592	0.000819897
qseB	0.653567	4.79132	6.9718	0.0282292	0.0475504
qseC	1.59104	5.24163	71.7494	2.01e-05	0.000137291
queD	-3.63878	6.00242	139.745	1.45e-06	2.83e-05
queF	-0.730744	6.51159	17.9525	0.00249043	0.0057707
racR	-2.44692	6.9305	125.883	2.21e-06	3.48e-05
radA	0.677489	7.17112	15.2506	0.00401878	0.0087634
radD	-0.717877	4.38505	13.5477	0.0092159	0.0179241
raiA	-4.4163	9.34439	136.384	1.6e-06	2.93e-05
rapZ	-1.94416	7.14792	91.4826	7.83e-06	7.25e-05
ratA	-1.87254	7.12255	104.031	4.72e-06	5.23e-05
ravA	-1.67419	5.32311	12.8776	0.00643619	0.0131255
rayT	-1.26673	4.78561	30.2345	0.000467252	0.00145294
rbbA	3.0045	6.67661	235.002	1.75e-07	1.12e-05
rbn	-0.746797	4.94163	17.0826	0.00288816	0.00657624
rbsA	-2.89515	6.95183	39.8124	0.000179011	0.00068553
rbsB	-1.64795	7.1256	20.3376	0.00170094	0.00417875
rbsC	-3.44537	6.66731	55.0544	5.48e-05	0.000279329
rbsD	-4.58694	8.41573	119.933	2.68e-06	3.81e-05
rbsK	-0.860457	6.81363	12.6957	0.00668823	0.0135604
rbsR	-0.905262	5.27223	23.3411	0.00110032	0.00290537
rcdA	-0.780269	3.84938	17.492	0.0205448	0.0360672
rclA	1.16053	4.77195	21.1017	0.00151591	0.00378167
rclB	-1.80028	3.37558	80.8298	3.85e-05	0.000214478
rclC	-0.867408	4.5461	13.4587	0.00570636	0.011896
rclR	0.659411	4.32469	9.80564	0.0175362	0.0313354
rcnA	4.0455	6.05534	267.806	1.02e-07	9.56e-06
rcnB	-0.901424	6.6416	32.0078	0.000384532	0.00125226
rcnR	1.71783	4.99647	59.3452	4.14e-05	0.000224554
rcsA	-0.649195	5.13691	12.4383	0.00706609	0.0142032
rcsC	2.49554	7.3873	121.034	2.59e-06	3.76e-05
rcsD	1.6781	7.7811	81.1214	1.25e-05	9.94e-05
rcsF	-4.35572	6.98588	518.73	6.54e-09	4.5e-06
rdgB	-1.8828	6.04275	75.8537	1.62e-05	0.000117726
recA	1.84539	11.2236	93.4193	7.21e-06	6.87e-05
recC	2.40196	6.89826	206.032	3e-07	1.4e-05
recE	2.49153	3.17909	121.707	2.53e-06	3.75e-05
recG	-0.865796	6.23823	16.0554	0.0034647	0.0077175
recJ	0.758507	7.62832	18.697	0.00220269	0.00519985
recN	2.13589	8.24215	89.631	8.48e-06	7.6e-05
recO	-0.964597	6.53383	8.57463	0.0178695	0.0318498
recR	-1.87422	8.26758	56.5962	4.94e-05	0.000257055
recX	1.02324	5.70445	9.54934	0.0138523	0.025602
relA	1.80499	8.53915	49.1862	8.32e-05	0.000377455
rep	1.14343	7.07822	21.9914	0.00133081	0.00338999
rfaD	-1.24991	8.06196	30.3048	0.000463578	0.00144687
rfaE	0.858239	8.00069	12.7365	0.0066306	0.0134696
rfaH	-1.54632	6.17992	67.038	2.61e-05	0.000164328
rfbB	1.02235	8.97716	16.8926	0.00298531	0.0067754
rfbC	-0.747593	7.42142	9.40929	0.0143546	0.026449
rffC	-1.70872	6.24264	61.0651	3.71e-05	0.00020856
rffG	-1.07533	7.01723	22.9621	0.00115968	0.00304108
rffH	-1.39321	6.75951	36.7522	0.000237698	0.000854939
rffM	-1.45258	5.98914	46.1584	0.000104983	0.000447295
rffT	-1.16772	6.24179	33.3309	0.000334381	0.00112199
rhlB	-1.21416	8.48962	25.4639	0.000829321	0.0023027
rho	-1.68547	9.6444	28.7798	0.000552083	0.00165546
rhsA	2.44931	4.60707	148.059	1.15e-06	2.57e-05
rhsB	2.95025	5.19262	222.221	2.2e-07	1.27e-05
rhsC	3.06981	5.61946	109.143	3.9e-06	4.65e-05
rhsD	3.09298	5.7835	185.236	4.64e-07	1.7e-05
rhsE	2.15344	3.40139	61.377	3.64e-05	0.00020624
rhtC	-1.8051	6.55194	51.2703	7.14e-05	0.000337307
ribA	-2.20484	6.72873	133.293	1.76e-06	3.03e-05
ribD	-0.662393	7.24812	13.3646	0.00581727	0.0120862
ribE	-2.28643	7.67563	70.8782	2.11e-05	0.000141918
ridA	-1.44502	8.98646	31.6698	0.000398807	0.00128489
rihA	-2.29696	4.82775	60.4932	3.85e-05	0.00021438
rihC	-1.14957	4.69819	19.2217	0.00202438	0.00484583
rimI	-1.42348	6.67917	25.0017	0.000880579	0.00241312
rimK	0.602452	6.32613	11.1693	0.0093701	0.0181957
rimL	-0.726992	4.86177	21.03	0.00153218	0.0038132
rimM	1.58857	12.7216	45.622	0.000109551	0.000463001
rimO	-2.26825	6.54633	75.5924	1.64e-05	0.000118857
rlhA	1.25134	6.74755	18.6702	0.00221233	0.00521256
rlmA	-0.850314	5.87723	11.8065	0.00811241	0.0159926
rlmB	-0.740289	6.64764	15.5901	0.00377251	0.00830624
rlmC	0.744269	6.02288	9.04714	0.0157628	0.0286665
rlmF	0.859744	6.23486	18.3248	0.00234109	0.00548519
rlmH	-1.34527	7.36647	25.175	0.000860906	0.00237314
rlmJ	-1.54999	5.87441	33.6956	0.000322004	0.00108828
rlmL	1.66304	7.93185	35.832	0.000259854	0.00091581
rluA	-1.83604	6.53484	63.9833	3.11e-05	0.000183105
rluC	0.946358	8.10115	14.2937	0.00482843	0.0102861
rluE	-2.43469	5.22782	60.3524	3.88e-05	0.000215415
rluF	-0.543264	6.14708	8.06091	0.0205745	0.0361041
rmf	-2.48002	7.69797	118.993	2.77e-06	3.85e-05
rmuC	1.55847	6.15952	47.2223	9.66e-05	0.000418791
rna	-1.56984	6.31577	103.141	4.88e-06	5.35e-05
rne	1.31864	8.93249	45.2165	0.000113168	0.000475173
rng	0.561792	7.43399	8.59067	0.0177925	0.0317259
rnhA	-1.22147	6.29295	35.7453	0.000262069	0.000922843
rnhB	-1.96915	6.84668	31.6943	0.00039775	0.00128436
rnk	-2.56847	6.3762	179.822	5.24e-07	1.77e-05
rnlA	0.446	8.01183	7.17228	0.0265814	0.0450822
rnlB	-1.36552	6.85589	76.6289	1.56e-05	0.000114581
rnpA	-3.60562	8.96326	95.3584	6.65e-06	6.49e-05
rnr	2.61932	9.05529	59.1142	4.2e-05	0.000227203
rnt	-2.24568	4.93371	66.3402	2.71e-05	0.000169364
rob	-0.833409	8.11539	19.345	0.00198512	0.00476814
rof	-1.297	6.47996	30.5146	0.000452815	0.00141961
rpe	-1.16152	7.11938	35.2375	0.000275535	0.000959304
rpiA	-1.63492	8.5063	42.1779	0.000145559	0.000580163
rplA	1.31242	13.0203	26.7593	0.000704118	0.00202326
rplB	0.8021	12.9474	12.9813	0.00629781	0.0128996
rplE	1.02892	13.0274	19.5025	0.00193631	0.00466691
rplF	1.00947	13.158	18.8121	0.00216197	0.00512588
rplL	-1.00326	12.9976	17.9432	0.00249432	0.00577336
rplM	-0.723085	11.5598	8.52401	0.0181155	0.0322063
rplO	0.753017	12.8061	12.0386	0.00770705	0.0153302
rplU	-0.983958	11.3163	12.6785	0.00671263	0.0135968
rplW	-0.605255	12.0236	7.23214	0.026113	0.0444312
rplY	-3.38496	10.894	111.11	3.64e-06	4.46e-05
rpmA	-1.35885	11.4626	22.674	0.00120746	0.0031487
rpmB	-2.34181	11.183	57.9176	4.53e-05	0.000241309
rpmC	-0.815231	11.2042	15.2315	0.00403318	0.00877442
rpmE	-3.70459	10.4562	157.787	8.9e-07	2.27e-05
rpmF	-2.57034	11.5814	113.361	3.36e-06	4.25e-05
rpmG	-3.14089	11.0264	101.407	5.22e-06	5.58e-05
rpmH	-5.29954	9.58795	188.623	4.31e-07	1.66e-05
rpmI	-0.602449	11.6747	8.28144	0.0193547	0.0341205
rpnA	0.620156	4.25792	15.7407	0.0298562	0.0497463
rpnB	1.59768	4.57124	44.042	0.000124511	0.000512908
rpnC	0.993722	5.15214	33.3591	0.000333404	0.00111961
rpoA	1.5481	13.6873	54.5447	5.67e-05	0.00028572
rpoB	2.54035	11.8729	60.7304	3.79e-05	0.000212082
rpoC	2.90491	12.3601	98.6559	5.82e-06	5.93e-05
rpoE	0.509964	8.47241	6.93017	0.0285871	0.0480186
rpoH	1.22605	9.73423	36.8818	0.000234769	0.000845127
rpoN	0.628525	8.35174	8.55736	0.017953	0.0319768
rpoS	2.05878	10.468	49.5315	8.11e-05	0.000369795
rpoZ	-2.19165	8.33	76.3988	1.58e-05	0.000115717
rppH	-1.02439	7.88208	32.6741	0.000358193	0.00118766
rpsA	1.32155	13.0144	38.9776	0.000193047	0.000726044
rpsB	1.79978	12.7978	45.9669	0.000106586	0.000453206
rpsC	0.753171	12.8153	13.0079	0.00626288	0.0128457
rpsD	1.08076	12.9992	27.2794	0.000660489	0.00191451
rpsE	0.762915	12.6864	12.6143	0.00680486	0.0137439
rpsF	-0.818929	11.7532	7.73472	0.0225602	0.0390182
rpsG	-0.712594	11.7076	10.6412	0.0106005	0.0202054
rpsI	-1.56878	12.056	39.2349	0.00018858	0.000713358
rpsJ	-0.817887	12.2173	10.3494	0.0113669	0.0214522
rpsL	-1.82567	12.2155	62.479	3.41e-05	0.00019599
rpsN	0.902412	12.6196	14.7593	0.0044114	0.00950445
rpsO	-2.28962	11.926	63.1544	3.27e-05	0.000190254
rpsQ	-0.78691	12.5569	14.5508	0.00459243	0.00984828
rpsR	-1.66515	11.0352	30.7468	0.000441268	0.00139276
rpsT	-3.54106	12.2855	108.34	4.02e-06	4.73e-05
rpsU	-3.80964	11.1658	103.97	4.73e-06	5.23e-05
rraA	-1.17535	8.64549	29.1923	0.00052622	0.00159498
rraB	-3.07555	9.47529	166.216	7.21e-07	2.07e-05
rrrD	0.621516	4.53835	14.6433	0.0153784	0.0280767
rrrQ	1.4315	2.65683	8.7013	0.017272	0.0309423
rsd	-0.796353	6.87024	11.9211	0.00790898	0.0156799
rseA	1.06719	9.1318	24.7864	0.000905788	0.00246772
rseB	0.98438	8.24301	29.4142	0.000512929	0.00155807
rseD	-0.628747	5.38655	10.9215	0.00992394	0.0191329
rseP	1.27322	9.50038	41.4293	0.000155238	0.000611095
rsfS	-1.50915	7.46456	27.0088	0.00068275	0.00196589
rsmA	-1.91002	8.03853	47.7389	9.28e-05	0.000411217
rsmC	-1.14247	6.92864	17.4508	0.00271086	0.00621634
rsmD	-0.554571	6.05183	11.2264	0.00924798	0.0179781
rsmF	-1.07538	4.66322	10.7177	0.0104105	0.0199336
rsmH	1.62485	8.41784	74.5001	1.74e-05	0.000123208
rsmJ	-0.789358	5.92464	26.3887	0.000737394	0.0020997
rssA	0.956744	6.34818	34.3169	0.000302195	0.00103297
rsuA	-0.814576	7.11283	10.4053	0.0112149	0.0212223
rsxA	-1.34944	5.10211	43.4474	0.00013079	0.000529844
rsxC	1.37194	6.54913	14.0408	0.00507544	0.0107524
rsxE	-2.02291	4.60312	49.8687	7.91e-05	0.000361848
rsxG	-1.90341	4.63653	51.216	7.17e-05	0.00033825
rtcA	1.20899	5.12959	47.4484	9.49e-05	0.000416258
rtcB	2.1545	4.68578	130.46	1.92e-06	3.17e-05
rtcR	1.40498	5.54896	38.9154	0.000194146	0.000727908
rutG	1.02632	3.54609	23.4143	0.00768471	0.0153002
ruvB	1.2342	6.70372	64.3832	3.04e-05	0.000180087
ruvC	-2.27871	7.67882	72.5719	1.92e-05	0.000133196
rzpD	0.650829	5.90677	9.35311	0.0145624	0.0267615
sanA	-0.80127	4.58989	14.9007	0.00429374	0.00926928
sapB	-1.33154	4.46338	28.8663	0.000546533	0.00163999
sapC	-1.78995	4.28545	56.808	4.87e-05	0.000254415
sapD	-1.70741	5.18492	49.9299	7.87e-05	0.000361001
sapF	-2.16752	4.61279	76.0837	1.6e-05	0.000117168
sbcB	2.10627	6.99851	63.5621	3.19e-05	0.000186965
sbcC	0.820208	6.07212	13.4818	0.0056795	0.0118469
sbcD	-0.889608	5.35131	17.48	0.00269738	0.0061888
sbmA	1.20621	5.82392	54.6345	5.64e-05	0.000284315
sbp	2.80509	8.35546	19.3539	0.00198232	0.00476496
scpA	1.61582	3.69248	65.9467	2.77e-05	0.000171903
scpC	1.53866	3.79527	44.3174	0.00012173	0.000503592
sdaB	-1.87812	7.0671	23.444	0.00108486	0.0028723
sdaC	-2.81096	7.80616	50.6363	7.47e-05	0.00034964
sdhA	-1.73809	9.98682	39.5366	0.000183504	0.000699099
sdhB	-2.80975	9.62207	110.209	3.76e-06	4.53e-05
sdhC	-4.91455	9.39428	168.618	6.8e-07	2.01e-05
sdhD	-4.09863	8.91605	135.836	1.63e-06	2.94e-05
sdhE	-2.39166	7.82082	137.526	1.55e-06	2.92e-05
sdiA	0.866727	5.9434	7.6287	0.0232567	0.0401073
secA	1.05121	9.07864	13.1613	0.00606621	0.0124984
secB	-1.21463	8.63783	25.103	0.00086901	0.00238691
secD	1.5251	9.64722	55.9206	5.17e-05	0.000265444
secE	-0.657573	9.55004	8.26765	0.0194283	0.0342263
secF	0.693299	8.83513	11.7132	0.00828285	0.016298
secM	-1.43534	8.00418	44.7121	0.000117876	0.000490782
secY	1.67595	13.6412	60.2463	3.91e-05	0.00021637
selB	0.738563	7.04343	21.9654	0.0013358	0.00339486
selD	1.01968	8.08711	39.7919	0.00017934	0.000686165
selU	0.563406	5.44697	8.29991	0.0192567	0.0339994
seqA	-0.810479	7.77596	22.7444	0.00119556	0.00312349
serA	1.33167	9.32053	13.893	0.00522701	0.011029
serC	0.560098	8.85519	8.55635	0.0179579	0.0319768
serS	-1.13977	8.8857	24.016	0.00100364	0.0026924
setC	1.71122	2.94136	54.8517	0.00107055	0.00284117
sfmC	1.00621	3.47124	7.48882	0.0242174	0.0414915
sfmD	2.79926	4.22799	61.3162	3.66e-05	0.000206672
sfmH	1.53923	2.49077	11.8858	0.0157227	0.0286184
sfsA	0.759303	7.53838	12.3965	0.00712987	0.0142835
sfsB	-1.51423	5.72102	53.7156	6.01e-05	0.000298199
sgcA	-1.7029	3.33927	59.303	0.000107448	0.000455709
sgcQ	0.732843	5.5973	9.28804	0.0148079	0.0271533
sgrR	0.713397	4.16427	18.78	0.0162137	0.0293721
sgrT	-5.9026	3.19727	96.7238	6.29e-06	6.27e-05
sieB	1.6008	3.29214	34.0681	0.000320794	0.00108507
skp	-1.50265	9.59583	36.5937	0.000241342	0.000862875
slmA	-2.07526	7.09671	83.3629	1.13e-05	9.16e-05
slt	1.63482	6.58236	72.6614	1.91e-05	0.000133171
slyA	0.58783	6.99733	13.8737	0.0052473	0.0110551
slyD	-1.85553	10.2914	47.819	9.23e-05	0.000409666
slyX	-2.06919	6.16771	88.9061	8.76e-06	7.72e-05
smf	1.20677	5.86417	41.5326	0.000153856	0.00060633
smg	-0.950787	7.8139	19.3528	0.00198266	0.00476496
smpB	-3.09955	7.18723	182.154	4.97e-07	1.74e-05
smrA	0.839362	5.38994	12.4786	0.00700521	0.0140943
smrB	-0.788212	6.03345	25.5355	0.000821713	0.00228622
sodA	-3.38791	10.4362	120.623	2.62e-06	3.76e-05
sodC	-0.895633	4.39503	27.0762	0.00108839	0.00287931
sohB	1.03774	7.91106	31.9467	0.000387062	0.00125661
soxR	-1.1963	4.24313	31.1584	0.000421674	0.00133998
soxS	-2.87749	5.13093	191.447	4.06e-07	1.59e-05
speA	2.27889	9.7786	119.545	2.72e-06	3.83e-05
speB	-10.7361	6.75161	304.86	1.07e-06	2.47e-05
speC	2.82549	7.62115	221.169	2.25e-07	1.27e-05
speD	-0.855178	7.44349	14.0759	0.00504023	0.0106885
speF	2.42888	3.60717	62.8301	3.33e-05	0.000193465
spoT	0.642173	8.64572	7.20167	0.0263501	0.0447802
sppA	0.786076	6.8517	24.1999	0.000979138	0.00263339
spy	-1.07485	5.20915	32.8466	0.000351744	0.00116997
sra	-4.30386	6.20313	408.64	1.77e-08	5.14e-06
srkA	-0.920297	7.23446	18.0319	0.00245762	0.00570412
ssb	-1.67754	8.31864	64.2241	3.07e-05	0.00018102
sseA	0.516712	6.3412	6.98999	0.0280745	0.0473088
sspA	-1.406	8.89123	39.3075	0.000187343	0.000710955
sspB	-1.53064	8.24827	47.4661	9.48e-05	0.000416125
ssuB	1.03702	4.43682	27.5535	0.000638839	0.00186632
stfR	3.1556	3.7751	167.072	7.06e-07	2.05e-05
sthA	-1.44088	9.28632	18.7902	0.00216964	0.00514081
stpA	-3.94231	6.70225	134.523	1.69e-06	2.95e-05
sucA	-1.63993	9.86119	28.7448	0.00055435	0.00166025
sucB	-1.62486	9.83654	22.0195	0.00132542	0.00338075
sucC	-2.08697	9.82071	43.9912	0.000125033	0.000512952
sucD	-2.7155	10.1063	72.5799	1.92e-05	0.000133196
sufB	1.30355	5.33428	35.5023	0.000268408	0.000943082
sufE	-2.19667	3.72072	68.8825	2.35e-05	0.000154263
suhB	-1.02123	8.61737	8.6264	0.0176222	0.0314624
surA	0.599656	8.99745	11.4633	0.00876165	0.0171518
sutR	-2.30117	4.35631	80.3974	1.3e-05	0.000101926
sxy	1.12466	5.1608	21.8288	0.00136246	0.00344801
syd	-1.22323	5.89764	44.2796	0.000122107	0.000503901
symE	-1.84297	4.13155	61.8433	3.54e-05	0.000200966
tabA	-1.42326	6.11547	58.5666	4.35e-05	0.000234127
tamA	0.881242	6.25871	25.693	0.000805278	0.00224932
tamB	1.89064	7.24331	115.887	3.08e-06	4.04e-05
tatA	-2.56304	8.85374	149.839	1.1e-06	2.5e-05
tatB	-1.41905	8.25035	53.1281	6.26e-05	0.000307406
tatC	-1.3108	7.59119	41.8676	0.000149478	0.000592973
tatE	-3.22546	8.54586	173.386	6.07e-07	1.9e-05
tauA	1.5286	4.22459	24.2277	0.000975495	0.00262527
tauB	1.47165	3.57005	31.5325	0.000404793	0.00129911
tauC	1.73358	2.96415	47.7521	0.00082734	0.00229871
tcyJ	1.8411	9.4913	30.286	0.000464553	0.00144776
tcyP	1.18478	9.85556	29.5608	0.000504374	0.00153988
tdcC	0.895515	3.53787	22.0789	0.0192649	0.0339994
tdcE	1.45561	3.82015	67.9202	4.06e-05	0.000221611
tdcG	1.01864	3.52847	28.396	0.0085949	0.0168332
tehB	-1.96895	5.22388	109.686	3.83e-06	4.59e-05
tesA	-1.05345	5.63861	28.725	0.000555641	0.00166145
tesB	-0.715833	5.92887	12.3376	0.00722112	0.0144457
tfaQ	2.10015	2.89206	41.7891	0.000158934	0.000621101
tgt	0.90148	8.6509	15.458	0.00386606	0.00848554
thiB	1.0892	5.84472	15.7217	0.00368214	0.00813284
thiC	3.63984	6.92673	87.1749	9.46e-06	8.11e-05
thiD	2.91454	5.56262	97.9165	6e-06	6.1e-05
thiE	2.48801	5.5821	72.5022	1.93e-05	0.000133196
thiF	2.40606	5.541	57.6224	4.62e-05	0.000245048
thiG	1.58099	4.88622	26.338	0.000742098	0.00210788
thiH	1.78212	5.28053	39.1801	0.000189519	0.000715981
thiK	0.514884	5.8014	8.75546	0.0170241	0.0305895
thiL	-1.37968	6.62831	21.9676	0.00133538	0.00339486
thiM	3.16506	6.16359	194.334	3.81e-07	1.57e-05
thiP	1.76409	5.84851	39.9455	0.00017689	0.000679058
thiQ	1.0214	5.79435	13.9053	0.00521425	0.0110076
thpR	-1.69294	4.88175	108.681	3.97e-06	4.7e-05
thrA	3.97242	8.32936	180.13	5.2e-07	1.77e-05
thrB	1.81805	6.70682	61.2328	3.68e-05	0.000206965
thrC	1.7747	6.68826	82.7955	1.16e-05	9.37e-05
thrS	1.83909	10.4072	90.7614	8.08e-06	7.42e-05
thyA	-2.65766	7.04215	102.71	4.97e-06	5.38e-05
tig	1.92975	11.8063	51.5985	6.97e-05	0.00033243
tilS	1.32771	6.9634	65.5843	2.83e-05	0.000174005
tisB	4.49426	2.51738	96.1124	6.45e-06	6.34e-05
tktA	-0.889879	8.90536	9.69258	0.0133609	0.024836
tktB	0.827299	6.45454	19.6852	0.00188152	0.00457157
tmcA	0.722876	6.82779	7.8802	0.0216462	0.0376858
tmk	-0.709843	6.28597	9.76634	0.0131164	0.024433
tnaA	1.74974	3.15724	44.5579	0.000245602	0.000874385
tolA	1.02406	8.65915	22.2374	0.00128463	0.0032927
tolB	0.674065	9.83155	13.7146	0.00541763	0.0113854
tolQ	0.98713	8.51815	24.8407	0.000899338	0.00245651
tomB	-2.70944	7.52139	126.789	2.15e-06	3.41e-05
tonB	-2.08503	7.93281	151.515	1.05e-06	2.45e-05
topA	2.39616	8.97888	133.914	1.73e-06	2.99e-05
topAI	-1.3096	4.02414	20.9659	0.00154691	0.00384304
topB	1.36779	7.25231	27.3628	0.000653806	0.00190474
torA	2.81439	3.72762	113.675	3.32e-06	4.25e-05
torD	1.19862	4.20305	53.0292	6.59e-05	0.000319107
torI	-1.91222	2.29416	20.4182	0.00856949	0.0167913
torS	2.48112	5.14567	133.736	1.73e-06	3e-05
torY	2.62859	4.1135	88.8826	8.77e-06	7.72e-05
torZ	3.19861	4.85715	158.329	8.78e-07	2.27e-05
tpiA	-2.47364	9.56414	93.9667	7.05e-06	6.78e-05
tpx	-3.5454	10.4746	183.976	4.77e-07	1.7e-05
treB	-3.72703	5.87068	38.0904	0.000209486	0.000771297
treC	-3.84343	5.2095	45.2105	0.000113223	0.000475173
treF	1.09506	5.19179	42.622	0.000140168	0.000561091
treR	-0.741918	5.0293	10.7917	0.0102304	0.0196604
trg	2.27822	4.91679	112.039	3.52e-06	4.37e-05
trkG	1.2554	5.49241	38.3836	0.000203868	0.000755248
trmD	2.10891	12.8619	81.8512	1.21e-05	9.75e-05
trmH	-1.76525	6.42212	23.1824	0.00112471	0.00296419
trmJ	-1.03238	7.79666	19.0999	0.00206413	0.00492414
trmL	-1.77109	5.78424	61.9489	3.52e-05	0.000200215
trmO	-3.43045	5.90228	200.49	3.36e-07	1.5e-05
trpB	1.13132	5.91373	51.1438	7.2e-05	0.000338738
trpC	2.06641	6.10379	64.7642	2.97e-05	0.000177852
trpD	1.7158	4.08628	48.9407	8.47e-05	0.000383158
trpR	-0.875132	5.58075	19.6231	0.00189992	0.00460298
truA	0.474913	7.24514	7.7686	0.0223431	0.0387224
trxA	-3.38281	10.6082	196.575	3.64e-07	1.54e-05
trxB	-0.88066	8.59523	19.98	0.00179713	0.00437412
trxC	-2.60672	6.82614	123.991	2.35e-06	3.61e-05
tsaC	-0.797769	7.10574	13.0134	0.00625566	0.0128383
tsf	0.940798	11.6688	17.8173	0.00254757	0.00587718
tsgA	-0.682136	6.32618	13.1962	0.00602257	0.0124328
tsr	2.12529	4.51564	73.9887	1.79e-05	0.000126094
tsx	-0.883365	9.4065	10.2276	0.0117073	0.0220253
ttcA	1.48773	7.30412	39.1418	0.00019018	0.000717832
ttdT	2.35062	4.42919	104.299	4.67e-06	5.22e-05
tufB	1.9193	13.6541	32.1435	0.000378979	0.00123995
tusB	-3.58148	5.84946	194.876	3.77e-07	1.57e-05
tusC	-2.73825	5.90878	130.914	1.89e-06	3.16e-05
tusD	-2.16057	6.66629	105.474	4.47e-06	5.07e-05
tusE	-2.79587	6.09223	102.798	4.95e-06	5.37e-05
tynA	2.06433	3.27651	91.3895	1.04e-05	8.64e-05
tyrA	2.28419	7.14559	158.26	8.79e-07	2.27e-05
tyrP	1.74625	6.38922	99.921	5.54e-06	5.83e-05
tyrR	2.35852	7.68146	146.744	1.19e-06	2.58e-05
tyrS	0.75569	8.70972	13.3753	0.0058045	0.0120716
ubiC	-1.68673	6.74791	102.485	5.01e-06	5.41e-05
ubiD	0.676295	8.92117	9.58723	0.0137201	0.0253861
ubiE	-1.03372	7.8523	24.7707	0.000907653	0.00246959
ubiF	0.857473	6.89326	32.4534	0.000366665	0.00120623
ubiG	-2.14667	6.03761	154.909	9.59e-07	2.36e-05
ubiI	-1.27641	6.04419	35.199	0.00027659	0.000961086
ubiJ	-0.837767	7.31279	12.9591	0.00632714	0.0129423
ubiK	-3.9077	7.50797	291.5	7.2e-08	8.59e-06
ubiX	-2.36768	6.2842	75.2434	1.67e-05	0.000120166
ucpA	1.13465	7.27334	46.6455	0.000101036	0.000433558
udk	-2.03066	6.29222	53.8116	5.97e-05	0.000296574
udp	-2.0851	7.253	94.8169	6.8e-06	6.57e-05
ugpB	3.50905	7.53469	13.2526	0.00595282	0.012307
ugpC	1.34042	5.72129	12.7301	0.00663963	0.0134814
ugpE	1.30118	4.03517	7.77795	0.0222836	0.0386721
uhpB	1.45885	5.54498	51.3928	7.08e-05	0.000335752
uhpT	-2.25363	4.46356	120.844	2.6e-06	3.76e-05
uidA	1.70605	2.49639	13.354	0.00802687	0.0158547
uidC	3.23251	2.95255	40.5785	0.000167224	0.000650472
uidR	-0.790466	5.76363	24.4441	0.000947731	0.0025604
ulaE	1.87449	4.3367	90.0508	8.33e-06	7.55e-05
ulaF	1.28812	4.06715	44.9064	0.000116035	0.000484072
ulaR	1.00496	4.85926	20.6395	0.00162468	0.00401487
umpG	-0.510899	7.36329	7.8934	0.0215656	0.037561
umpH	-1.05631	6.79663	36.0109	0.000255351	0.000901454
umuC	2.26475	7.66169	83.6729	1.11e-05	9.05e-05
uof	2.6009	2.50116	42.3768	0.000226004	0.000819897
upp	1.65687	8.68771	13.0752	0.00617566	0.0126927
uraA	2.17708	6.73242	171.165	6.4e-07	1.95e-05
usg	0.780213	7.43341	13.7026	0.0054308	0.0114074
ushA	2.8766	7.54854	169.121	6.72e-07	2.01e-05
uspA	-1.15562	7.28887	12.6593	0.00674012	0.0136393
uspB	-1.26155	5.56196	29.5317	0.000506053	0.00154388
uspC	-1.87502	4.94481	29.1284	0.000530125	0.0016022
uspD	-0.875671	5.92946	8.47293	0.0183681	0.0326
uspE	0.943744	7.66472	16.6225	0.00313041	0.00706655
uspG	-1.58121	6.69542	68.8788	2.35e-05	0.000154263
uup	1.79593	8.12328	44.9454	0.000115669	0.000483508
uvrA	1.93142	8.07906	80.7381	1.27e-05	0.000100478
uvrB	1.26495	7.76448	51.7952	6.87e-05	0.000328152
uvrD	1.28365	8.2159	34.041	0.000310799	0.00105771
uvrY	-0.641097	7.91547	11.9888	0.00779185	0.0154695
uxaA	2.16702	4.65429	79.7548	1.34e-05	0.000104365
uxaB	1.25524	3.1503	30.0142	0.00643488	0.0131255
uxaC	1.57887	4.24625	58.0689	4.49e-05	0.000239432
uxuA	0.911612	4.17693	16.609	0.0031379	0.00707966
uxuB	2.04208	4.81238	90.2404	8.26e-06	7.51e-05
uxuR	0.794746	6.498	24.1157	0.000990269	0.00266162
valS	1.6939	8.959	50.4889	7.55e-05	0.000352245
vsr	-0.838312	4.6204	7.50393	0.0241112	0.0413603
waaB	0.692964	6.93832	14.499	0.00463878	0.00993755
waaC	-1.66689	6.93905	31.6134	0.000401254	0.0012917
waaF	-1.04164	7.46057	20.9208	0.00155738	0.00386218
waaG	0.620701	6.98269	10.7834	0.0102503	0.0196898
waaL	-2.65205	6.98511	105.41	4.48e-06	5.07e-05
waaU	-1.36152	5.94021	36.659	0.000239831	0.000859668
waaZ	-0.487488	5.45323	7.13358	0.02689	0.0455687
wbbJ	-0.77697	7.85477	10.8792	0.0100225	0.0192964
wcaM	0.933286	3.7114	17.8621	0.00904151	0.0176421
wecC	-0.890578	7.53683	12.0471	0.00769263	0.0153087
wecE	-1.07018	6.67594	30.3258	0.000462485	0.00144506
wzxE	-0.827546	6.35222	20.3093	0.00170832	0.00418708
wzyE	-1.08076	5.24039	19.5289	0.00192825	0.00465284
wzzB	1.242	10.0121	29.1292	0.000530078	0.0016022
xanP	-2.82044	8.95086	50.451	7.58e-05	0.000352833
xanQ	1.26374	3.11897	35.9306	0.00675957	0.0136655
xapR	1.79381	5.3327	49.9528	7.86e-05	0.000360787
xdhD	2.44399	4.29601	106.991	4.22e-06	4.89e-05
xerD	0.937318	7.03394	28.6881	0.000558047	0.00166502
xisD	-2.53516	2.67785	80.9982	7.7e-05	0.000355881
xseA	1.17964	6.81566	58.8789	4.26e-05	0.000230045
xseB	-4.35523	7.56184	280.116	8.49e-08	8.93e-06
xylA	0.859253	4.65096	24.2874	0.000967734	0.00260606
xylB	1.88784	5.30354	115.966	3.07e-06	4.04e-05
xylE	1.09395	3.76173	19.4733	0.00205041	0.00489975
xylG	1.12853	3.37247	9.84644	0.0128571	0.0240163
xynR	0.86341	6.94023	15.7882	0.00363746	0.00805108
yaaA	-1.07775	5.907	27.4477	0.00064709	0.0018878
yaaX	-2.9479	5.70769	243.191	1.52e-07	1.05e-05
yaaY	-2.26868	2.50046	26.4578	0.000798481	0.00223567
yabI	0.69164	6.70602	9.48415	0.0140833	0.0260062
yabQ	-4.04664	6.97601	339.476	3.83e-08	7.61e-06
yacC	-2.87185	6.95301	245.719	1.46e-07	1.02e-05
yacG	-2.97918	6.84961	143.767	1.3e-06	2.67e-05
yacH	0.923236	4.06545	13.0958	0.00614921	0.0126446
yacL	-1.1308	7.33943	47.2914	9.61e-05	0.000418716
yadE	0.895661	5.80241	18.4053	0.00231026	0.00542807
yadG	0.744876	6.68257	20.5877	0.00163745	0.00404168
yadI	-1.60774	4.96885	48.1178	9.02e-05	0.000402145
yadK	1.46984	3.11195	13.9334	0.00518501	0.0109624
yadM	1.36038	3.30898	31.0748	0.00170591	0.00418449
yaeF	0.727775	4.69428	13.926	0.00519267	0.010973
yaeH	-0.861371	6.30819	24.9551	0.000885961	0.00242629
yaeP	-1.66473	6.77228	37.84	0.000214436	0.000786766
yaeQ	-0.982703	6.0935	30.1144	0.000473615	0.00146514
yaeR	-2.03613	5.785	131.385	1.86e-06	3.13e-05
yafC	1.28386	4.70329	41.4206	0.000155356	0.000611095
yafN	-0.951581	5.62211	29.7084	0.000495938	0.00152298
yafP	-0.792504	5.11367	15.9655	0.00352164	0.00782977
yafQ	-1.71057	6.47903	88.2977	8.99e-06	7.84e-05
yafW	0.960393	5.41639	21.1604	0.00150276	0.00375557
yafX	0.94023	6.49097	25.9893	0.00077546	0.00218199
yafY	0.840971	4.07774	15.2533	0.006433	0.0131255
yafZ	0.869191	3.91343	24.0911	0.008414	0.0165328
yagA	1.75742	2.23203	31.4354	0.0180399	0.0320854
yagB	-1.84686	4.89356	52.6191	6.48e-05	0.000316336
yagF	2.26866	4.52085	88.97	8.73e-06	7.72e-05
yagG	1.00282	3.15695	12.6632	0.026343	0.0447802
yagH	1.70891	4.51264	92.4087	7.53e-06	7.06e-05
yagJ	0.665122	5.5325	8.00106	0.0209219	0.0366374
yagL	0.849889	4.88822	13.4566	0.00570873	0.011896
yagM	0.910029	3.7555	6.97039	0.0282412	0.0475516
yagN	-2.97456	7.11727	122.351	2.48e-06	3.71e-05
yagU	-0.79333	7.85854	10.8716	0.0100404	0.0193219
yahB	1.89874	6.53797	36.6894	0.000239134	0.000857901
yahC	1.2258	3.10343	20.1579	0.00897235	0.0175234
yahD	1.56651	3.88306	68.648	2.38e-05	0.000155467
yahE	2.0509	3.15561	36.7303	0.000238197	0.000856001
yahF	2.44357	3.47436	76.8935	1.54e-05	0.000113532
yahG	2.02434	3.64323	57.7798	4.57e-05	0.000243166
yahL	1.70568	3.5828	23.8844	0.00102164	0.00272848
yahM	0.660202	5.43828	8.47301	0.0183677	0.0326
yahN	2.08035	4.5972	59.3395	4.14e-05	0.000224554
yahO	-1.54266	7.00908	68.4375	2.41e-05	0.000156579
yaiA	-1.33243	6.90715	51.8843	6.83e-05	0.000326813
yaiI	-2.04559	5.71725	72.9151	1.89e-05	0.000131618
yaiL	-0.83538	8.61417	14.6647	0.0044924	0.00964855
yaiO	1.01014	3.14839	11.3437	0.0257286	0.0438483
yaiP	0.995547	3.23999	16.22	0.0222864	0.0386721
yaiT	3.36087	6.83749	178.753	5.36e-07	1.77e-05
yaiW	0.708556	6.46272	22.5897	0.00122191	0.00317651
yaiX	2.4691	4.13292	46.8702	9.93e-05	0.000427367
yaiY	-2.46315	5.12956	178.985	5.34e-07	1.77e-05
yaiZ	-3.87301	6.3601	254.942	1.25e-07	9.56e-06
yajC	-1.50188	9.04101	56.2909	5.04e-05	0.000260245
yajD	-1.31957	6.71573	60.6064	3.82e-05	0.000213156
yajG	-2.13589	7.9813	114.784	3.2e-06	4.13e-05
yajI	-1.84693	5.14096	126.999	2.13e-06	3.4e-05
ybaB	-2.77576	8.98843	99.6847	5.59e-06	5.84e-05
ybaE	0.786874	4.05743	14.3317	0.0115102	0.0216836
ybaK	-1.20946	5.96449	33.8971	0.000315408	0.00106943
ybaL	1.32841	6.96052	49.1839	8.32e-05	0.000377455
ybaM	-1.80079	4.74936	64.8928	2.95e-05	0.000177392
ybaN	-2.96715	6.52818	251.737	1.32e-07	9.56e-06
ybaP	-1.35362	5.90281	53.9666	5.9e-05	0.000294114
ybaQ	-2.17541	6.49034	86.9493	9.55e-06	8.16e-05
ybaT	2.2509	6.2005	97.75	6.04e-06	6.12e-05
ybaV	-0.976704	4.60912	29.7589	0.000493092	0.00151535
ybaY	-2.29567	7.3049	146.916	1.19e-06	2.58e-05
ybbD	0.76757	3.96588	7.34534	0.0252549	0.0431634
ybbO	-1.22174	5.55477	52.5387	6.52e-05	0.00031776
ybbP	1.34382	4.82275	56.3399	5.03e-05	0.000260039
ybcJ	-4.45048	6.09831	255.881	1.23e-07	9.56e-06
ybcK	1.35165	3.79147	25.3173	0.000845167	0.00234051
ybcW	-2.07187	3.26634	49.3502	8.22e-05	0.000373603
ybcY	1.62869	3.63674	15.7124	0.00368842	0.00813817
ybdF	-2.58045	4.60868	141.407	1.39e-06	2.78e-05
ybdJ	-4.70313	5.62486	298.597	6.52e-08	8.59e-06
ybdK	-0.830932	3.94006	12.2111	0.00976005	0.0188515
ybdL	0.928227	3.52302	17.1469	0.0161616	0.0292903
ybdR	1.32911	4.18374	50.0505	7.8e-05	0.000358601
ybdZ	-6.09122	4.97064	474.581	9.49e-09	4.5e-06
ybeD	-4.68863	7.52297	412.003	1.71e-08	5.14e-06
ybeM	1.68156	5.34069	59.5234	4.09e-05	0.000222528
ybeQ	1.5389	4.29051	52.3386	6.61e-05	0.000320067
ybeU	1.15832	3.01354	11.2674	0.016909	0.0304478
ybeX	-0.64262	7.77198	12.9607	0.00632495	0.0129423
ybeY	-1.95974	6.60303	152.107	1.03e-06	2.44e-05
ybeZ	-0.54154	7.18202	9.6172	0.0136167	0.0252308
ybfA	-2.23703	5.83581	59.6841	4.05e-05	0.000221141
ybfE	-2.04538	5.83656	65.8571	2.79e-05	0.00017254
ybfF	-1.13929	5.1726	44.2918	0.000121985	0.000503895
ybfG	1.22954	2.72192	19.9637	0.0272433	0.0461488
ybfL	2.08973	2.758	42.4143	0.000394488	0.00127677
ybfO	2.1942	3.90632	75.3407	1.67e-05	0.000119813
ybfP	-0.717805	4.64473	15.5521	0.00393603	0.00860315
ybgA	-3.32225	4.56383	279.979	8.51e-08	8.93e-06
ybgE	-2.66896	5.99861	134.968	1.67e-06	2.95e-05
ybgI	0.852205	7.44413	12.1153	0.00757855	0.0151032
ybgQ	1.61642	2.98533	42.8265	0.00147697	0.0036999
ybgU	-2.29932	4.03018	48.0459	9.07e-05	0.000403502
ybhA	-1.15264	6.17018	21.6181	0.00140487	0.00353616
ybhB	-2.48235	7.07942	78.5212	1.42e-05	0.000107473
ybhC	1.26167	4.72275	51.1401	7.21e-05	0.000338738
ybhF	0.557535	5.0732	9.57067	0.0137777	0.0254754
ybhH	1.82696	2.41512	18.2698	0.00708344	0.0142176
ybhI	1.52734	2.64516	26.9928	0.00965707	0.0186869
ybhJ	2.05771	4.13088	58.0615	4.49e-05	0.000239432
ybhL	-1.14268	6.53047	47.2294	9.65e-05	0.000418791
ybhQ	-1.66173	5.50729	101.075	5.29e-06	5.63e-05
ybhR	1.25112	4.34095	25.4169	0.000834356	0.00231362
ybhS	-1.19169	3.78231	34.2221	0.000784338	0.0021996
ybiA	-0.942489	3.9835	26.6879	0.00349865	0.00778486
ybiB	-0.528252	6.10306	10.5505	0.0108317	0.0205713
ybiI	-3.85939	4.68052	234.667	1.76e-07	1.12e-05
ybiJ	-3.35289	5.3114	310.628	5.54e-08	8.32e-06
ybiO	1.3468	4.32048	46.5345	0.000101919	0.000436901
ybiR	0.612703	6.21435	10.6634	0.0105449	0.0201451
ybiU	0.710764	5.51621	15.4663	0.00386005	0.00847679
ybiV	-1.65963	6.07653	91.2521	7.91e-06	7.3e-05
ybiW	1.23589	3.37419	41.2466	0.00314033	0.00708133
ybiX	-3.20302	5.43814	160.976	8.21e-07	2.17e-05
ybjC	-1.16844	4.571	43.834	0.000126665	0.00051914
ybjD	1.33426	6.18738	56.1586	5.09e-05	0.000262224
ybjH	-0.569231	5.21379	9.36131	0.0145319	0.0267171
ybjL	0.946252	6.79513	22.7245	0.00119892	0.0031303
ybjN	-1.86288	6.89455	123.623	2.38e-06	3.64e-05
ybjQ	-0.835536	5.74769	22.4215	0.00125137	0.00323308
ybjS	-0.816206	6.08313	20.9361	0.00155382	0.00385564
ybjT	0.814239	5.88714	28.743	0.00055447	0.00166025
ybjX	-0.736342	7.97903	16.1649	0.0033968	0.00758636
ycaC	-0.989574	5.04045	20.0815	0.00176916	0.00431356
ycaD	1.32718	8.09909	31.2384	0.00041799	0.0013323
ycaI	2.17561	4.93839	135.693	1.64e-06	2.94e-05
ycaK	1.46073	4.29674	14.7589	0.00441173	0.00950445
ycaM	1.66584	4.22038	55.0945	5.46e-05	0.00027891
ycaN	1.19092	3.55973	16.0618	0.00346064	0.00771559
ycaO	-1.17361	6.53578	16.7164	0.00307901	0.00696548
ycaP	1.39239	4.88746	66.9125	2.62e-05	0.000165076
ycaR	-3.129	7.00602	310.444	5.55e-08	8.32e-06
ycbK	-0.509578	7.8639	9.0359	0.0158092	0.028726
ycbX	0.802172	6.24418	22.138	0.00130305	0.00333381
yccA	-2.69606	7.69113	119.572	2.71e-06	3.83e-05
yccE	1.27101	2.92951	41.1443	0.012329	0.0231224
yccF	-1.4973	5.03142	28.5796	0.000565201	0.00167803
yccJ	-1.60833	7.66395	44.5508	0.000119432	0.000495785
yccM	2.33622	4.44289	54.6859	5.62e-05	0.000284031
yccS	1.51618	6.40432	67.1754	2.59e-05	0.00016336
yccU	-3.53859	6.99547	188.302	4.34e-07	1.66e-05
yccX	-1.47219	4.75625	72.9866	1.88e-05	0.000131559
ycdU	2.27887	3.07956	35.4108	0.000270844	0.000949764
ycdX	-0.523124	7.05461	10.1698	0.0118732	0.0223074
ycdY	-0.86514	7.18523	23.993	0.00100676	0.00269903
ycdZ	-1.00256	6.35489	32.7081	0.000356912	0.00118435
yceB	-2.56317	6.49885	145.453	1.24e-06	2.64e-05
yceD	0.634746	11.2393	6.9086	0.0287749	0.0482761
yceH	1.29484	6.3545	18.4014	0.00231175	0.00542854
yceK	-0.937503	6.55209	23.7453	0.00104111	0.00277167
yceM	1.60769	6.12878	40.3959	0.000169943	0.000657397
yceQ	-0.847382	6.37537	28.2633	0.00058673	0.00173094
ycfH	-1.70416	6.57113	50.3741	7.62e-05	0.000354038
ycfJ	-1.24974	6.67828	32.7459	0.000355491	0.00118057
ycfP	-1.76342	7.6552	36.6409	0.000240249	0.000860433
ycgB	1.40684	5.21276	32.515	0.000364275	0.00120128
ycgH	4.61758	7.33106	210.597	2.75e-07	1.39e-05
ycgJ	-0.80134	5.49442	17.8048	0.00255295	0.00588637
ycgM	1.10713	6.30228	13.8883	0.00523193	0.0110338
ycgN	-0.803397	5.57501	9.07189	0.0156613	0.0285229
ycgR	1.61198	4.7234	100.124	5.49e-06	5.8e-05
ycgV	2.707	5.04813	134.651	1.69e-06	2.95e-05
ycgX	-0.75369	4.39359	9.11316	0.0154937	0.0282504
ycgZ	0.652867	6.50989	6.87768	0.0290467	0.0485451
ychH	-4.64105	6.89131	405.245	1.83e-08	5.14e-06
ychJ	-1.89153	6.12065	132.539	1.8e-06	3.07e-05
ychN	-2.48898	7.10117	146.882	1.19e-06	2.58e-05
ychO	1.31017	5.52529	31.9255	0.000387946	0.0012585
ychQ	-1.14267	5.90258	12.5711	0.00686796	0.013858
ychS	-1.462	3.64153	31.0498	0.000426738	0.001353
yciA	-2.23831	6.47862	111.081	3.64e-06	4.46e-05
yciB	-1.1128	6.17402	32.3176	0.000371997	0.00121805
yciC	-0.646159	6.23931	11.902	0.00794244	0.0157314
yciE	-1.96303	3.99306	23.4426	0.00108506	0.0028723
yciF	-1.57599	2.94624	7.04407	0.0276208	0.0466566
yciG	-2.54091	3.01495	16.6846	0.00309628	0.0070008
yciH	0.781108	6.60179	10.6494	0.0105798	0.0201843
yciI	-3.03499	6.30157	76.8448	1.54e-05	0.00011354
yciN	-4.19171	8.22354	383.844	2.3e-08	5.85e-06
yciO	0.536517	6.16856	7.27762	0.0257639	0.0438905
yciQ	1.96777	5.35711	113.915	3.29e-06	4.23e-05
yciT	-1.07801	5.62239	26.7475	0.000705148	0.00202483
yciU	-0.691388	7.10207	13.2779	0.00592191	0.0122551
yciW	-0.657625	5.39158	17.6132	0.00263697	0.00605681
yciX	-2.05485	4.25894	60.1599	3.93e-05	0.000217164
yciY	-2.20968	6.96478	80.3509	1.3e-05	0.000101964
yciZ	-2.74749	4.10451	111.952	3.53e-06	4.37e-05
ycjD	-2.35988	2.96873	47.6414	9.35e-05	0.000413128
ycjF	1.11222	4.72648	10.6102	0.0106789	0.0203273
ycjG	1.55849	5.85861	63.1096	3.28e-05	0.000190503
ycjM	2.59316	2.88365	50.4228	7.59e-05	0.000353168
ycjT	2.10733	3.10766	89.7287	3.02e-05	0.000179314
ycjV	2.17952	1.87582	19.6532	0.0224452	0.0388761
ycjX	1.62617	4.73414	21.0402	0.00152986	0.00380967
ydaS	-1.35049	2.53768	15.5158	0.0273813	0.0463045
ydbA	6.10469	9.4604	325.316	4.57e-08	8e-06
ydbD	3.7488	4.39532	88.438	8.94e-06	7.81e-05
ydbH	2.24723	5.72706	164.406	7.54e-07	2.07e-05
ydbJ	-1.8589	6.51729	110.79	3.68e-06	4.49e-05
ydbL	-0.628009	4.68342	9.34143	0.0146062	0.0268301
ydcA	-1.90068	3.9443	79.0976	1.38e-05	0.000105575
ydcC	1.88081	2.76591	18.8697	0.00214193	0.00508375
ydcD	-0.84098	3.79967	22.0923	0.0141273	0.0260644
ydcF	-0.538121	5.35396	10.891	0.00999492	0.0192609
ydcH	-1.8402	5.20305	78.5194	1.42e-05	0.000107473
ydcI	-1.29154	6.89696	28.7042	0.000556993	0.00166407
ydcJ	1.39769	4.35199	62.7358	3.35e-05	0.0001943
ydcK	1.01896	3.90737	22.9044	0.00225583	0.00530612
ydcR	1.73093	5.57359	79.5259	1.35e-05	0.000104948
ydcS	1.45491	3.91665	48.4892	8.77e-05	0.000394305
ydcY	-2.53267	7.25962	175.285	5.81e-07	1.85e-05
yddA	-1.70974	3.44496	81.6892	5e-05	0.00025882
yddG	-1.79507	3.29664	44.0069	0.000124872	0.000512908
yddM	-1.78749	5.6321	43.5288	0.000129908	0.000527287
yddW	1.12337	4.6238	44.3111	0.000121792	0.000503592
ydeA	1.69858	5.76565	72.5088	1.93e-05	0.000133196
ydeE	1.00399	4.41048	10.2206	0.0117271	0.0220526
ydeI	-1.39271	3.34007	39.5529	0.00116397	0.00305044
ydeN	2.56416	2.96426	18.0805	0.00243778	0.00566433
ydeP	2.73969	3.46925	41.3368	0.000156488	0.000613825
ydeR	1.6039	2.29893	9.26825	0.0232827	0.0401356
ydeT	3.26474	3.75789	13.845	0.0052775	0.0111076
ydfD	2.47858	2.32185	13.7148	0.00541737	0.0113854
ydfE	4.4201	3.95096	51.3938	7.07e-05	0.000335752
ydfG	-0.552143	7.28659	7.96752	0.0211199	0.0369532
ydfI	1.87802	3.2926	29.1543	0.00052854	0.00160086
ydfJ	2.20066	2.90956	10.7203	0.010404	0.0199304
ydfK	-1.48094	5.17283	35.1544	0.000277817	0.000963756
ydfO	-1.71494	2.33036	26.5553	0.0145093	0.0266873
ydfU	2.55803	2.75277	104.565	3.99e-05	0.000218413
ydfZ	-3.27762	4.94511	24.8331	0.000900237	0.00245737
ydgA	2.13356	8.7662	128.586	2.03e-06	3.27e-05
ydgC	-2.2578	5.06997	161.382	8.13e-07	2.17e-05
ydgD	0.710353	5.63027	9.96764	0.0124768	0.0233787
ydgI	1.33256	5.77381	21.8059	0.00136699	0.00345324
ydgK	-0.801101	6.33203	16.2033	0.00337339	0.0075421
ydhB	1.26647	5.25065	51.5512	7e-05	0.000332804
ydhJ	0.959154	4.55295	14.5179	0.00462178	0.00990618
ydhK	1.35076	4.55239	23.276	0.00111025	0.00292974
ydhL	-2.04809	3.2672	53.5904	6.06e-05	0.000299734
ydhP	1.76107	5.73998	92.8369	7.39e-06	6.98e-05
ydhQ	1.02857	6.97237	30.2088	0.000468606	0.001455
ydhR	-1.60716	6.95687	55.0236	5.49e-05	0.000279574
ydhS	1.42289	4.21036	44.7703	0.000117321	0.000488953
ydhT	1.10039	3.04066	18.109	0.0211727	0.0370302
ydhV	2.0117	2.56442	27.4858	0.0016912	0.00415782
ydiE	-3.54715	5.05984	238.918	1.64e-07	1.09e-05
ydiH	-4.88725	6.98319	515.009	6.74e-09	4.5e-06
ydiJ	1.45976	7.15208	64.9499	2.94e-05	0.000177392
ydiK	0.482778	5.92874	7.68932	0.0228552	0.0394635
ydiM	2.04521	2.11438	16.0443	0.0120391	0.0226089
ydiP	1.46416	3.1227	15.4344	0.00388305	0.00851839
ydiS	1.71115	2.42329	32.3676	0.0105941	0.0202024
ydjA	-0.602296	7.17059	14.1181	0.0049983	0.0106103
ydjE	1.59699	3.72285	27.9861	0.000606426	0.00178528
ydjF	1.97467	5.39093	22.5244	0.00123325	0.00319218
ydjG	1.70392	3.80841	29.0726	0.000533569	0.00160798
ydjH	1.31088	2.85594	24.2694	0.012748	0.0238549
ydjM	-1.23764	3.34141	16.8561	0.00335381	0.00751433
ydjY	-2.49875	3.57423	17.8507	0.00253331	0.00585071
ydjZ	-1.92387	3.34932	23.9248	0.00101608	0.00271881
[truncated: 525 more rows]

## Sheet: W3110_0_vs_J15_1_putrescine
genes	logFC	logCPM	F	PValue	FDR
speB	-10.7013	6.82475	473.588	3.06646e-08	0.000129435
yedE	-3.81923	5.58066	385.487	6.73211e-08	0.000142081
fliC	-7.76532	4.15318	289.99	1.9877e-07	0.00027967
aspA	-2.15542	8.21524	110.636	7.25291e-06	0.00730766
yedF	-2.96424	5.91861	105.4	8.65632e-06	0.00730766
dctA	-2.26218	7.56863	91.0724	1.47042e-05	0.0103444
cusC	3.26716	3.72589	85.715	1.82916e-05	0.0110298
yrhA	-1.80301	4.40253	77.4474	2.62968e-05	0.0126697
fecA	-2.50552	8.9928	76.8646	2.70142e-05	0.0126697
ddpX	-2.05317	4.11407	72.5982	3.30927e-05	0.0139684
pdhR	-1.48075	7.36531	70.3187	3.70499e-05	0.0142171
aldA	-1.21142	6.60372	60.6151	6.24068e-05	0.0219516
dhaK	-1.10606	7.90895	57.6831	7.4149e-05	0.0237128
nac	-1.75512	5.72635	53.937	9.35157e-05	0.0237128
thiB	2.4078	6.93434	53.2543	9.77052e-05	0.0237128
amtB	-1.92575	6.58462	53.1864	9.8135e-05	0.0237128
malT	-1.35691	7.05107	52.1181	0.000105216	0.0237128
ynjE	-3.05796	5.01906	51.3201	0.000110928	0.0237128
cusB	2.43061	3.69037	51.1656	0.000112079	0.0237128
cusF	3.00022	4.27146	50.8894	0.000114174	0.0237128
dacC	-1.74477	4.18299	50.3853	0.000118127	0.0237128
yqaE	1.85354	5.92964	48.7264	0.000132409	0.0237128
dsrB	1.14208	8.33351	48.4557	0.000134942	0.0237128
azuC	4.57778	2.69598	47.7616	0.00014172	0.0237128
dhaM	-1.17921	7.42207	47.4374	0.000145033	0.0237128
glpF	-1.29329	6.86157	46.4187	0.000156097	0.0237128
gatZ	-1.70864	7.38198	46.3314	0.000157095	0.0237128
ptsG	-1.43001	8.90124	45.6174	0.000165555	0.0237128
fhuF	-1.55626	9.60047	45.4278	0.000167898	0.0237128
thiQ	1.46439	6.19807	45.3768	0.000168535	0.0237128
fecC	-1.94162	7.09935	44.5313	0.000179556	0.0244486
glnK	-2.06439	7.55638	42.0551	0.0002175	0.0286897
ybaN	-1.38961	6.90319	40.4322	0.000247944	0.0304324
bhsA	1.85032	7.82393	39.9199	0.000258655	0.0304324
napD	-3.16226	5.17799	39.5029	0.000267805	0.0304324
thiM	3.06798	6.1858	39.33	0.000271717	0.0304324
grxA	1.03971	6.34864	38.9817	0.000279823	0.0304324
dhaL	-0.883544	7.14911	38.9538	0.000280485	0.0304324
msyB	0.959546	7.11765	38.9246	0.00028118	0.0304324
sstT	-1.27123	6.56198	38.0415	0.000303271	0.0320026
fecB	-1.92194	8.33185	37.7554	0.000310893	0.0320068
ompW	-3.01719	6.39186	37.0302	0.000331322	0.0332978
glnA	-1.33449	10.4957	36.321	0.00035296	0.0345131
manX	-1.55398	7.81247	36.1092	0.000359767	0.0345131
ydfA	2.19598	3.03762	34.6892	0.000409928	0.0363468
ibpB	5.02655	7.69238	34.3413	0.000423538	0.0363468
fecE	-1.69682	7.15731	34.0914	0.000433666	0.0363468
frdA	-2.97114	7.73906	34.0913	0.000433671	0.0363468
ddpA	-1.50832	3.59144	34.0376	0.000435886	0.0363468
dinD	1.16778	6.00063	33.8975	0.000441733	0.0363468
yqeF	-1.17046	6.09436	33.6111	0.000454002	0.0363468
thiD	2.85476	5.62062	33.607	0.000454181	0.0363468
yqgC	-1.08122	7.62467	33.4469	0.000461231	0.0363468
metK	-0.87957	7.59084	33.3627	0.000464991	0.0363468
ldrC	1.1728	5.15555	32.9284	0.000485021	0.0372232
dinB	0.868376	7.67116	32.3071	0.000515606	0.0388638
recA	1.24078	10.8689	31.4004	0.000564726	0.041147
ruvA	1.01306	7.30301	31.3888	0.000565394	0.041147
lldP	-1.18511	6.21686	30.4022	0.000625828	0.0439434
gatY	-1.21224	9.18207	30.35	0.000629248	0.0439434
trpR	0.935626	6.56639	30.2622	0.000635051	0.0439434
fecD	-1.62465	6.55368	29.6711	0.000675925	0.0460174
ychH	-0.973634	7.51095	29.3156	0.000702116	0.0470417
insE-3	-2.43051	4.33823	28.7108	0.000749669	0.0489978
soxS	1.58378	6.99397	28.5488	0.00076309	0.0489978
napF	-3.11486	5.81319	28.468	0.000769899	0.0489978
recN	1.125	7.58706	28.281	0.000785946	0.0489978
focA	-2.35064	8.2551	28.1417	0.000798178	0.0489978
ampH	-0.945916	5.47825	27.9709	0.000813506	0.0489978
nikA	-3.61347	4.83414	27.9129	0.000818792	0.0489978
grxB	-1.10918	6.65059	27.8543	0.000824175	0.0489978
thiP	1.72003	5.91859	27.4921	0.000858481	0.0503284
corA	0.789323	6.88617	27.3183	0.000875579	0.0506277
glpT	-1.52715	6.26902	27.1882	0.000888663	0.0506898
lexA	1.04371	9.24553	26.8759	0.000921079	0.0518383
yebF	0.887275	8.67482	26.5179	0.000960096	0.0533232
yafN	0.874518	6.5984	26.3476	0.000979385	0.0536881
moaE	1.32618	7.75857	25.8477	0.00103891	0.0558497
moaC	1.21431	7.41335	25.7963	0.00104528	0.0558497
yebK	-0.838534	5.42261	25.6203	0.00106748	0.056323
manY	-1.30358	7.58784	25.0287	0.00114661	0.0586803
rplY	-1.8447	11.2032	24.9863	0.00115256	0.0586803
yfcD	0.750634	7.6604	24.9771	0.00115386	0.0586803
yibT	1.82892	7.07406	24.7634	0.0011845	0.0593391
maoP	1.10512	10.7214	24.6781	0.00119701	0.0593391
marA	1.30047	6.70502	24.5974	0.00120899	0.0593391
creD	1.48354	5.27405	24.3511	0.00124654	0.0599202
frdB	-2.15291	6.39946	24.3339	0.00124923	0.0599202
insB-4	-0.748531	6.74565	24.0786	0.00128982	0.0610781
nikB	-2.81647	4.54698	24.0021	0.00130231	0.0610781
dinI	1.22212	7.96638	23.883	0.00132205	0.0613226
yjcB	0.972154	7.99864	23.6851	0.0013557	0.0614371
sdhC	-1.77996	9.80049	23.6422	0.00136313	0.0614371
yedR	1.11762	5.56247	23.6132	0.00136818	0.0614371
rstA	-1.01725	7.04735	23.257	0.00143225	0.0636369
yhdW	-1.76911	4.26261	23.0946	0.00146272	0.064314
ibpA	3.02426	7.45683	22.9917	0.00148244	0.0645091
insE-5	-2.16469	4.32006	22.6671	0.00154691	0.0659114
ydjY	-3.05984	3.55759	22.6496	0.00155048	0.0659114
pepE	-2.25515	5.07543	22.5959	0.00156151	0.0659114
gdx	1.58103	7.85184	22.5063	0.00158015	0.0660376
recX	1.35895	6.02915	22.386	0.00160561	0.0664437
cbrC	0.999103	6.37369	22.2329	0.00163874	0.066807
yhbV	-3.1972	4.97965	22.1998	0.00164604	0.066807
ldrA	1.00138	5.17352	22.0291	0.00168422	0.0672643
malE	-1.75059	3.11035	22.0073	0.00168918	0.0672643
moaD	0.987015	6.28364	21.8285	0.00173057	0.0682458
yhaL	0.978519	6.01845	21.715	0.00175747	0.0682458
renD	-0.705599	7.53443	21.6806	0.00176575	0.0682458
glnL	-0.948309	7.25133	21.5812	0.00178991	0.0682458
yegX	1.92565	4.42401	21.5618	0.00179466	0.0682458
yciY	0.971617	8.33488	21.4625	0.00181928	0.0685642
phoP	-0.884266	7.28291	21.2833	0.00186484	0.0696592
yjbJ	1.14301	9.42843	21.2151	0.00188253	0.0697032
malK	-2.89676	2.94595	21.0671	0.0019217	0.0705347
yfcE	0.691222	7.50193	20.8966	0.0019681	0.071615
hokD	1.60931	6.62424	20.5818	0.00205754	0.0742296
nrdD	-2.29542	7.16466	20.4422	0.00209884	0.0750781
melR	-0.880003	4.35599	20.3416	0.00212925	0.0752624
ybfE	-0.958827	6.19741	20.3076	0.00213966	0.0752624
relE	1.03673	7.03447	20.2206	0.00216656	0.0755788
deoD	-1.09337	7.78257	20.0975	0.00220538	0.0763026
yhcC	-1.86139	3.50145	19.931	0.00225929	0.0775322
manZ	-1.28208	7.71211	19.7794	0.00230982	0.077647
frdC	-1.59009	5.72456	19.7074	0.00233431	0.077647
nuoA	-1.2286	8.34551	19.6937	0.00233903	0.077647
ruvB	0.895996	6.57692	19.6441	0.00235613	0.077647
insE-1	-2.28048	4.18731	19.6201	0.00236446	0.077647
insE-4	-2.13066	4.24508	19.5956	0.00237301	0.077647
nikC	-2.4085	4.02107	19.5301	0.00239605	0.077798
xseB	-0.713013	8.26566	19.3855	0.00244794	0.0788761
ynhF	3.30873	1.91177	60.7346	0.00248118	0.0793413
yafP	0.804779	5.98119	19.0804	0.00256214	0.079853
yjcO	-0.875276	5.64043	19.0738	0.00256468	0.079853
yjjI	-2.33724	4.96079	19.0537	0.00257244	0.079853
bglJ	-0.835528	7.42166	19.0526	0.00257285	0.079853
ycjX	1.76368	4.94226	18.7483	0.00269418	0.0813032
tpr	2.91919	3.06299	18.7147	0.00270802	0.0813032
relB	1.13195	6.30155	18.709	0.00271036	0.0813032
bdcA	1.0731	4.20233	18.6935	0.00271678	0.0813032
mqsA	1.23938	7.46968	18.6503	0.00273476	0.0813032
acpT	-0.681232	6.05251	18.624	0.00274579	0.0813032
yhbU	-3.54493	5.65817	18.6035	0.00275441	0.0813032
yibA	0.987648	4.66585	18.4665	0.00281298	0.0824554
yraQ	-0.976458	5.44899	18.3559	0.00286142	0.083297
arnF	-1.14387	4.91353	18.0673	0.00299287	0.0865267
glsA	-1.70356	4.79779	17.9272	0.00305943	0.0875148
thiH	3.48898	6.80073	17.8794	0.00308257	0.0875148
arfA	1.04819	6.6648	17.8657	0.00308924	0.0875148
dppF	-0.892525	6.25741	17.7688	0.00313696	0.0881711
glpA	-3.64629	6.51164	17.651	0.00319621	0.0881711
yafO	0.874919	6.28834	17.6048	0.00321984	0.0881711
cyoB	-1.28191	10.1934	17.5842	0.00323045	0.0881711
azoR	-0.910749	5.08477	17.5695	0.00323802	0.0881711
astC	-1.15344	6.08426	17.5599	0.00324298	0.0881711
thiF	3.76306	6.82204	17.5298	0.00325863	0.0881711
frdD	-1.45479	6.42507	17.4722	0.00328889	0.0884229
hcaR	-0.776992	4.74034	17.4036	0.00332531	0.0884871
gltA	-0.906122	9.66305	17.3889	0.0033332	0.0884871
clpB	2.33531	8.77963	17.2284	0.00342074	0.0898994
groS	1.16575	9.71936	17.2063	0.00343304	0.0898994
mscS	0.869476	8.17076	17.1451	0.00346734	0.0898994
yadI	-1.00285	5.21803	17.1375	0.00347159	0.0898994
htrL	0.972201	8.66543	17.0735	0.003508	0.0902882
asr	-2.34596	5.36874	17.0149	0.00354174	0.0906042
acrZ	1.3264	6.55217	16.8364	0.00364706	0.0923042
fxsA	1.61808	5.92791	16.8203	0.00365679	0.0923042
yeiQ	-0.856299	4.33993	16.7922	0.0036738	0.0923042
dtpD	-1.0391	3.69144	24.4096	0.00373408	0.0927183
glnB	0.684882	8.3241	16.6936	0.00373421	0.0927183
yjdJ	0.871866	4.72121	16.5706	0.00381139	0.0938995
cadA	-1.72263	4.11333	16.5458	0.00382719	0.0938995
thiE	3.78463	6.81528	16.5125	0.00384852	0.0938995
cbrB	1.11038	7.06458	16.325	0.00397158	0.0959227
ygaH	-0.73262	6.11144	16.317	0.0039769	0.0959227
thiS	3.68624	6.13718	16.0475	0.0041629	0.0990334
yedJ	0.784961	6.29983	16.0326	0.00417348	0.0990334
thiG	3.41991	6.48093	16.0288	0.00417625	0.0990334
yfdI	1.02324	4.52532	15.9842	0.00420814	0.0992322
thiC	3.77333	7.15412	15.8967	0.00427177	0.100173
yhcO	0.692047	6.00925	15.8582	0.00430015	0.100281
insE-2	-1.96902	4.2622	15.7048	0.00441554	0.101856
yjiM	-3.00004	3.92659	15.691	0.00442611	0.101856
tusB	-0.892511	6.43051	15.6191	0.00448176	0.101856
ychS	1.68091	5.2249	15.6033	0.0044941	0.101856
ydfZ	-2.36455	5.13213	15.5956	0.0045001	0.101856
fepD	-0.656025	6.45054	15.5799	0.00451246	0.101856
cusA	1.219	3.34855	21.9848	0.00463768	0.104126
yicG	0.809611	5.57859	15.3667	0.0046841	0.104472
feoA	-2.06333	7.54192	15.3443	0.00470261	0.104472
fumB	-1.56689	3.64757	15.3074	0.00473331	0.104604
nmpC	-1.26456	7.26042	15.2739	0.00476133	0.104675
cyoC	-1.05346	10.0915	15.2385	0.00479127	0.104787
cutC	0.774821	6.28783	15.2077	0.00481748	0.104817
glpC	-2.36499	4.90954	15.0989	0.00491149	0.106315
bssS	1.06398	8.5066	15.0277	0.00497437	0.106723
ubiC	-0.865483	7.07574	15.0167	0.00498412	0.106723
bssR	-2.71686	6.89298	14.9826	0.00501468	0.106723
rsxD	-1.12261	4.40581	14.9595	0.00503543	0.106723
abrB	-1.13447	5.12927	14.9359	0.00505678	0.106723
napA	-1.67947	5.75754	14.8965	0.00509275	0.106747
ygeL	3.216	1.8109	20.0282	0.00511594	0.106747
ykgM	1.33208	5.11734	14.8519	0.00513376	0.106747
ompA	-0.937988	12.5216	14.7552	0.00522427	0.10785
nrdG	-1.70727	5.60011	14.7408	0.00523791	0.10785
trmO	-0.69023	6.54602	14.5948	0.00537886	0.110214
mqsR	1.21095	7.6125	14.5646	0.00540858	0.110288
dcuA	-0.830088	6.44025	14.5187	0.00545411	0.110682
yjhV	-1.12689	5.34685	14.3732	0.00560195	0.113138
nimT	1.21049	4.10873	14.3184	0.00565893	0.113677
ycjF	1.60047	5.16391	14.2959	0.00568249	0.113677
malP	-0.943149	4.90685	14.2159	0.0057675	0.114569
tatC	-0.770674	7.85468	14.1862	0.00579942	0.114569
btsT	-1.34204	6.64475	14.1778	0.00580851	0.114569
ytjB	-0.731317	5.64712	14.1339	0.00585621	0.114972
yidB	0.584995	5.94426	14.0105	0.00599301	0.116598
yaiY	-1.22897	5.4707	13.9915	0.00601443	0.116598
yigF	1.15527	4.60475	13.9685	0.00604047	0.116598
aphA	-0.882924	4.58633	13.9416	0.00607114	0.116598
rihA	-0.822246	5.26741	13.9364	0.00607712	0.116598
thiL	-0.857645	6.8746	13.8895	0.00613106	0.116832
fecI	-0.789539	8.95314	13.8778	0.0061447	0.116832
dicB	2.61063	2.36125	13.8341	0.00619564	0.117273
cho	0.777438	5.41761	13.7397	0.00630768	0.11886
marR	1.04092	5.18597	13.6351	0.00643476	0.119287
mcbR	0.983912	4.14946	13.6259	0.00644613	0.119287
rlpA	-0.679782	7.25151	13.602	0.00647562	0.119287
hypB	-2.20841	4.98746	13.5485	0.00654245	0.119287
cadB	-2.36597	3.8208	13.5329	0.00656205	0.119287
yedX	1.56507	4.74689	13.5275	0.00656888	0.119287
btsS	-0.965447	5.10486	13.5204	0.00657788	0.119287
hybC	-1.1782	5.68836	13.4977	0.00660662	0.119287
ynfK	-2.80294	6.02842	13.4809	0.00662805	0.119287
hslV	0.873596	7.85842	13.479	0.00663055	0.119287
gltK	-0.804626	5.78629	13.4441	0.00667535	0.119287
yggL	0.903075	8.32786	13.4222	0.00670366	0.119287
xerD	-0.551939	6.34279	13.396	0.00673773	0.119287
yfcC	-1.67929	3.92642	13.3743	0.00676598	0.119287
gadC	-1.18768	5.22495	13.3654	0.00677767	0.119287
bamE	0.830736	9.28399	13.3618	0.00678248	0.119287
trkG	0.620522	5.1925	13.2693	0.00690554	0.119622
cysC	1.36845	7.73219	13.2689	0.00690601	0.119622
ycaC	1.02538	6.11208	13.2583	0.00692028	0.119622
feoB	-1.80088	6.81156	13.2474	0.00693507	0.119622
glpB	-2.70261	5.45491	13.2413	0.00694326	0.119622
zntR	0.584655	6.13698	13.2198	0.00697255	0.119639
rne	-0.594423	7.95702	13.1643	0.00704866	0.119725
npr	-0.719876	7.00801	13.139	0.00708368	0.119725
yifB	0.792654	4.48626	13.1377	0.00708547	0.119725
psd	-0.867468	7.24109	13.1337	0.00709106	0.119725
ybiJ	0.538286	6.53181	12.978	0.00731185	0.122961
yihW	0.611024	5.26896	12.9429	0.00736279	0.123188
ygcN	-1.00676	4.03983	12.9286	0.0073837	0.123188
mltB	0.630671	5.49847	12.9077	0.00741443	0.123214
nikD	-1.76293	4.09424	12.8651	0.00747743	0.123474
gadB	-1.52331	5.78045	12.8417	0.0075123	0.123474
rpsR	-1.39354	11.1922	12.838	0.00751786	0.123474
dauA	-0.802688	5.2359	12.8008	0.00757389	0.123579
mglB	-1.44273	6.07404	12.7915	0.00758786	0.123579
treC	-1.59973	5.58104	12.7704	0.00761993	0.123579
yjiL	-2.14844	3.37046	12.7564	0.00764133	0.123579
sutR	-0.813488	4.78854	12.6794	0.00776019	0.124376
bioA	1.15584	7.7891	12.6436	0.00781626	0.124376
dcuB	-1.40206	3.41473	12.6405	0.0078212	0.124376
crcB	-0.687372	6.488	12.5956	0.00789226	0.124376
yciH	0.875068	6.7536	12.5641	0.00794266	0.124376
cof	-0.857629	4.3044	12.5621	0.00794586	0.124376
bioF	0.641815	8.08471	12.557	0.00795402	0.124376
pflB	-1.13909	9.79274	12.5543	0.00795843	0.124376
ispA	-0.697818	7.59623	12.5451	0.00797324	0.124376
oppA	-0.952794	9.87347	12.5093	0.00803119	0.124376
ghxP	-0.789931	7.92056	12.4455	0.00813593	0.124376
ymgF	0.764878	5.20372	12.4283	0.00816444	0.124376
ykfI	0.670506	5.29968	12.4202	0.008178	0.124376
lpoA	-0.630368	6.12887	12.4063	0.00820119	0.124376
nhaB	-0.693994	5.91272	12.3888	0.00823044	0.124376
ldhA	1.51335	7.08408	12.3727	0.00825752	0.124376
lacZ	-0.671275	5.46972	12.3662	0.00826849	0.124376
yhcN	0.734154	8.3494	12.3584	0.00828173	0.124376
glpK	-0.840122	8.23156	12.3583	0.00828196	0.124376
ydeT	1.78446	2.84515	12.3359	0.00831987	0.124376
yhfK	-0.751613	5.54417	12.3338	0.00832349	0.124376
rem	0.934125	3.74495	14.2727	0.00834511	0.124376
yecM	0.670944	5.43192	12.3075	0.00836838	0.124376
hda	0.600601	7.44444	12.2657	0.00844044	0.125007
sdhD	-1.05877	9.48566	12.2359	0.00849241	0.125128
dppD	-1.06472	6.19325	12.227	0.0085079	0.125128
tauA	0.914903	3.94316	12.1823	0.00858671	0.125849
nupC	-1.12387	6.87527	12.1654	0.00861673	0.125852
astA	-1.15348	5.19446	12.1075	0.00872047	0.126539
trpE	1.75766	3.18095	12.1057	0.00872374	0.126539
yacC	-0.707122	7.54627	12.0582	0.0088102	0.127356
argT	-0.625787	6.68901	12.029	0.00886376	0.127584
ydfD	2.08709	2.19929	12.0222	0.00889572	0.127584
rbbA	0.824862	5.13024	12.0004	0.00891671	0.127584
yeaL	-0.684859	4.53547	11.9752	0.00896379	0.127632
rna	-0.648685	6.69406	11.9663	0.00898047	0.127632
dmsA	-2.54304	4.34999	11.9455	0.00901955	0.127757
cydB	-0.878525	6.54493	11.8498	0.00920222	0.12924
trpD	1.22703	3.87461	11.8478	0.00920603	0.12924
mdtH	-1.04505	4.15984	11.8426	0.00921612	0.12924
groL	1.10886	10.5573	11.8102	0.00927914	0.129693
emtA	0.499398	6.6392	11.783	0.00933246	0.130008
soxR	0.799877	5.20715	11.7589	0.00938004	0.130162
dppC	-1.02496	5.51513	11.7314	0.00943472	0.130162
nhaA	0.900887	7.45038	11.7308	0.00943608	0.130162
yabQ	-0.502147	7.74688	11.7059	0.00948582	0.130422
tyrS	0.647268	8.7356	11.6778	0.00954245	0.130775
nadD	-0.869297	6.69042	11.6467	0.00960569	0.130881
yebW	0.799038	4.86171	11.6436	0.00961219	0.130881
ygeN	1.39323	2.846	12.1021	0.00971894	0.131909
xseA	-0.506618	5.98659	11.5661	0.0097721	0.132019
ygeQ	1.37416	5.12461	11.5577	0.00978963	0.132019
ydjZ	-1.29133	3.53789	11.5357	0.00983574	0.132219
grpE	1.07546	10.0901	11.5202	0.00986848	0.132238
hsdR	-0.566851	6.00073	11.4533	0.010011	0.133422
sbp	1.38922	7.32987	11.4491	0.0100201	0.133422
mcrC	0.671692	5.59547	11.4114	0.0101018	0.134086
ycgL	0.56197	6.61194	11.3366	0.0102662	0.135441
ybjP	-0.701254	4.61217	11.3358	0.010268	0.135441
kilR	3.42093	2.16719	11.2848	0.0103819	0.136415
mrdB	-0.798545	6.51816	11.2739	0.0104065	0.136415
yddB	1.04242	4.82198	11.2493	0.0104623	0.136723
ybaP	-0.733372	6.19179	11.1838	0.0106126	0.138259
ogrK	1.44977	5.87199	11.1298	0.0107387	0.139471
hisQ	-0.734941	5.92113	11.0543	0.010918	0.141156
ymgL	0.99506	3.55732	11.0439	0.0109429	0.141156
slyA	0.626573	7.11568	11.0332	0.0109688	0.141156
hypC	-2.04391	3.83953	11.0081	0.0110296	0.141507
yqiJ	1.22782	3.94368	10.9835	0.0110896	0.141846
cbrA	1.01249	5.07466	10.9486	0.0111755	0.142167
galE	-0.842949	7.19063	10.9459	0.0111821	0.142167
ybjI	0.935936	5.35592	10.9158	0.0112569	0.142471
yjiC	1.52164	2.64151	13.1175	0.0112735	0.142471
bioB	0.631256	8.54372	10.8805	0.0113453	0.142596
umpH	-0.774436	6.98284	10.878	0.0113518	0.142596
ygaZ	-0.530266	7.20754	10.8649	0.0113847	0.142596
uxuR	0.803592	6.60403	10.8131	0.0115169	0.143825
ynaI	0.732449	4.9545	10.7963	0.0115601	0.143862
rbsA	-1.2237	7.36031	10.7855	0.011588	0.143862
waaS	0.703907	7.1464	10.7332	0.0117245	0.145129
luxS	0.688947	9.12319	10.6919	0.0118336	0.146037
ykfG	1.04113	4.58863	10.6793	0.011867	0.146037
rbsB	-1.15989	7.33688	10.6476	0.011952	0.146304
ackA	-0.519835	8.38816	10.6453	0.0119581	0.146304
moaB	0.878907	6.98058	10.5643	0.0121789	0.147967
yqgA	-1.25656	4.59566	10.5482	0.0122233	0.147967
fimE	0.677227	5.15416	10.5453	0.0122314	0.147967
msrP	0.675692	4.43736	10.5443	0.0122342	0.147967
ygeP	1.06523	3.56738	10.5048	0.0123444	0.148874
waaJ	0.619008	6.78217	10.471	0.0124396	0.149594
ydcD	0.906501	4.69368	10.4537	0.0124887	0.149758
hspQ	0.68075	8.13866	10.4074	0.0126212	0.150918
mtr	0.844007	5.30616	10.2775	0.013003	0.154717
ubiK	-0.584757	8.23697	10.2674	0.0130332	0.154717
zntA	0.51916	6.42989	10.2437	0.0131046	0.154717
rpmI	-0.735216	11.7147	10.2338	0.0131348	0.154717
rplI	-1.09925	11.1463	10.2279	0.0131527	0.154717
coaD	0.705305	6.69032	10.2258	0.0131588	0.154717
cysK	0.861945	10.7371	10.2036	0.0132267	0.155083
ybaM	0.610087	5.77097	10.1686	0.0133343	0.155912
yahM	1.72745	6.26363	10.1182	0.0134913	0.157017
phoQ	-0.52655	6.27996	10.1132	0.0135071	0.157017
yhiI	0.991528	6.17289	10.0996	0.0135498	0.157017
gltJ	-0.524372	5.88413	10.0908	0.0135776	0.157017
cycA	-0.522029	7.25768	10.0454	0.0137222	0.158255
ybgA	-1.02953	5.05257	10.0258	0.0137851	0.158548
waaU	0.704539	6.93514	9.98135	0.0139295	0.159155
fruA	1.49483	4.80413	9.97674	0.0139445	0.159155
oppF	-1.00589	9.14381	9.96393	0.0139865	0.159155
yjjW	-1.31925	3.96694	9.96043	0.013998	0.159155
slyB	-0.657815	10.0645	9.95178	0.0140265	0.159155
ribC	0.625682	7.66235	9.91897	0.0141352	0.159958
ykgO	1.17767	3.45833	9.89845	0.0142037	0.160304
ybjX	-0.718807	8.07505	9.87518	0.0142819	0.160757
nagE	-0.552333	6.11454	9.8593	0.0143356	0.160932
cueO	0.638585	5.92955	9.84069	0.0143988	0.161213
yhaB	1.59297	2.64046	9.82864	0.0144399	0.161246
insI-3	-4.03506	1.5607	9.79218	0.0145653	0.162216
grcA	-1.50653	10.5478	9.72378	0.0148042	0.164199
racC	1.5247	2.88165	9.71899	0.0148211	0.164199
yoeA	-0.973225	5.50003	9.70239	0.0148799	0.164419
yoaB	0.524146	7.43786	9.65862	0.0150364	0.165715
aroF	0.700589	6.25589	9.62865	0.0151448	0.166475
ybaT	-0.800136	4.50423	9.60586	0.0152279	0.166895
acnB	-0.862114	9.85953	9.5965	0.0152622	0.166895
lptD	-0.597272	8.09859	9.56266	0.0153869	0.167825
ydhR	1.03704	8.24225	9.53957	0.0154728	0.168327
yohD	-0.633288	5.17049	9.5228	0.0155356	0.168575
hns	-0.573079	11.0375	9.503	0.0156101	0.168613
pptA	0.774589	4.07146	9.49558	0.0156381	0.168613
ykgL	0.853899	5.88996	9.49008	0.0156589	0.168613
blc	1.06248	6.04353	9.45869	0.0157785	0.169196
rihC	-0.616746	4.95515	9.45483	0.0157933	0.169196
ecnB	0.58519	7.11772	9.43257	0.0158788	0.169263
ymiA	0.825084	3.8139	11.8257	0.0158797	0.169263
rlmA	0.737195	6.72997	9.35453	0.0161835	0.172066
sdaC	-1.04349	8.26246	9.30788	0.0163691	0.173603
uxuA	1.22896	4.47596	9.2703	0.0165206	0.174771
apt	-0.557054	8.14332	9.2171	0.0167382	0.176259
pheS	-0.588661	7.94085	9.21548	0.0167448	0.176259
fepG	-0.559683	5.87158	9.19489	0.0168301	0.176342
rluE	-0.930184	5.65771	9.1934	0.0168363	0.176342
ecnA	-0.812828	5.54657	9.18279	0.0168804	0.176367
yiiE	1.24798	2.89017	12.6455	0.0171072	0.178295
yncI	1.0244	4.01133	9.1182	0.0171524	0.178325
dxr	-0.628373	6.95837	9.10827	0.0171947	0.178326
hycI	0.604235	5.24396	9.07459	0.0173391	0.179031
yoaH	0.598461	7.1895	9.05365	0.0174297	0.179031
ydcY	0.498543	8.38919	9.04756	0.0174562	0.179031
narK	-3.85716	5.52556	9.04177	0.0174814	0.179031
tyrA	0.60046	6.04775	9.03888	0.017494	0.179031
zinT	1.11359	3.60349	9.02422	0.0175581	0.179031
ytiD	1.24955	6.16122	9.02388	0.0175596	0.179031
oppC	-0.94053	8.75675	9.00308	0.017651	0.17914
ortT	1.14498	5.2743	9.00178	0.0176567	0.17914
tusE	0.650124	7.33157	8.99254	0.0176976	0.17914
mcrB	0.522623	6.23289	8.98054	0.0177508	0.179249
ucpA	-0.481832	6.48272	8.94521	0.0179086	0.180411
pgpA	-0.423385	7.4949	8.91224	0.0180575	0.181288
uvrB	0.58713	7.41771	8.90692	0.0180817	0.181288
rnhB	-0.750143	7.2722	8.88708	0.0181721	0.181288
glnG	-0.638981	6.99402	8.87122	0.0182449	0.181288
prlF	0.79488	6.11579	8.85055	0.0183403	0.181288
ybfF	-0.566726	5.45485	8.84939	0.0183457	0.181288
yjaA	1.26826	4.21587	8.83199	0.0184265	0.181288
rcsF	-0.568772	7.74608	8.82579	0.0184554	0.181288
ydgU	3.59077	1.44195	32.0872	0.0185018	0.181288
yoaC	0.651437	6.36127	8.81578	0.0185022	0.181288
pgpC	-0.707078	6.27536	8.81246	0.0185178	0.181288
lpoB	-0.815423	6.03937	8.81185	0.0185206	0.181288
bsmA	-0.581752	5.37891	8.80475	0.018554	0.181288
fruK	2.27857	3.97124	8.73665	0.0188775	0.182292
fruB	2.96134	3.69622	8.73311	0.0188945	0.182292
smrA	0.613021	5.35121	8.72779	0.0189201	0.182292
osmC	0.785038	6.9337	8.71753	0.0189696	0.182292
sgrT	1.12877	4.73915	8.71583	0.0189778	0.182292
cspA	-0.771391	14.2821	8.70852	0.0190132	0.182292
yqgE	-0.498059	6.70658	8.70628	0.019024	0.182292
hdhA	0.898827	6.13051	8.7037	0.0190366	0.182292
bioC	0.621903	7.56279	8.69804	0.0190641	0.182292
narG	-3.80513	5.31296	8.693	0.0190886	0.182292
ycgM	0.47751	6.01112	8.67347	0.019184	0.182789
yobA	-0.552056	6.84423	8.60771	0.0195099	0.185476
htpG	1.22823	8.32581	8.47296	0.0201998	0.191603
fdoH	0.709907	9.29008	8.4595	0.0202704	0.191841
rpsF	-1.00567	11.7756	8.44865	0.0203275	0.19187
yihA	0.680925	8.70315	8.44168	0.0203644	0.19187
miaA	0.487666	9.18037	8.41102	0.0205273	0.192975
proP	-0.715584	7.63255	8.39489	0.0206137	0.193236
dnaK	1.11379	9.87349	8.38465	0.0206688	0.193236
rplJ	-0.86406	12.4454	8.38027	0.0206924	0.193236
yagM	1.49341	4.22147	8.33645	0.0209306	0.194634
yicC	0.570583	8.42536	8.33577	0.0209343	0.194634
clpP	0.631781	8.48553	8.24734	0.0214258	0.198399
yqjD	0.642698	8.02143	8.24602	0.0214332	0.198399
yedA	-0.736615	5.05749	8.23271	0.0215085	0.19866
ydjO	0.820597	6.28706	8.2102	0.0216366	0.199406
rseD	0.681042	6.12344	8.20163	0.0216856	0.199423
rstB	-0.575335	6.12453	8.18389	0.0217875	0.199924
ysaA	-0.794328	5.65796	8.14801	0.0219955	0.201058
dppA	-0.96513	6.55579	8.14616	0.0220063	0.201058
yjgA	0.600357	8.84235	8.09784	0.0222905	0.203215
yijO	-0.860241	4.1405	8.08633	0.022359	0.203399
rutR	0.599556	6.08004	8.07484	0.0224275	0.203584
yqjK	0.574227	7.92196	8.05848	0.0225256	0.204036
ykfH	0.84586	3.8365	7.99272	0.0229253	0.206397
yjgL	0.687352	4.11713	12.2893	0.0229385	0.206397
ydjM	0.825056	4.26586	7.98603	0.0229664	0.206397
zapB	-0.570486	10.5801	7.98353	0.0229819	0.206397
speC	0.50225	6.00259	7.93258	0.0232987	0.20857
yigG	1.41727	2.91173	7.92877	0.0233227	0.20857
potF	-0.665665	4.99019	7.90853	0.0234502	0.209267
trpB	0.572243	5.66467	7.88498	0.0235998	0.209724
galT	-0.755837	6.35438	7.88483	0.0236008	0.209724
ansP	0.826764	3.75097	7.85901	0.0237662	0.210185
yadG	-0.472742	6.14749	7.8587	0.0237682	0.210185
metI	-0.794588	5.12703	7.84526	0.0238549	0.210185
rpoH	0.629205	9.43551	7.8402	0.0238876	0.210185
ytfH	0.678406	5.06875	7.83803	0.0239017	0.210185
ybaY	-0.552925	7.87594	7.8074	0.0241013	0.211058
dnaJ	0.631147	8.11048	7.80201	0.0241366	0.211058
comR	0.631666	5.95063	7.78742	0.0242326	0.211058
yecU	2.27286	2.74648	7.78414	0.0242542	0.211058
folK	-0.545946	6.51827	7.78326	0.0242601	0.211058
yagU	-0.820672	7.9443	7.77707	0.024301	0.211058
ilvI	-0.713906	4.41027	7.76273	0.0243961	0.211426
tolC	-0.491923	8.24326	7.75106	0.0244739	0.211426
higA	0.790844	4.72393	7.74813	0.0244935	0.211426
astD	-0.619006	4.55443	7.716	0.0247095	0.212855
ygeF	1.17857	2.86392	7.84963	0.0248552	0.213356
mepM	-0.490104	5.6301	7.69253	0.0248688	0.213356
cydA	-0.749929	6.78939	7.68395	0.0249274	0.213425
rbsK	-0.758855	6.9336	7.67383	0.0249967	0.213585
yfcV	1.65919	3.08584	7.64809	0.0251741	0.214667
yhiL	1.26383	2.7227	8.70924	0.0252739	0.215083
cdsA	-0.55996	7.67733	7.59943	0.0255139	0.216688
higB	1.23674	5.08533	7.57819	0.025664	0.217526
copA_1	0.48312	6.56113	7.55319	0.0258422	0.218198
hypD	-1.15316	4.65318	7.55256	0.0258467	0.218198
sbmC	0.609916	6.25546	7.52506	0.0260445	0.218526
hchA	0.771737	5.66509	7.52448	0.0260487	0.218526
cytR	-0.413703	6.67414	7.51797	0.0260958	0.218526
nrfA	-2.26467	4.94873	7.51361	0.0261274	0.218526
ycgZ	1.05005	6.86709	7.51128	0.0261444	0.218526
yagL	1.06013	5.12262	7.46977	0.0264481	0.220173
aqpZ	-1.16616	3.90035	7.46764	0.0264638	0.220173
nagC	-0.454349	6.9923	7.46303	0.0264979	0.220173
ompC	-0.666245	12.8868	7.43748	0.0266875	0.221312
yadH	-0.629397	5.95612	7.42125	0.0268089	0.221648
puuE	-0.61775	4.72281	7.41804	0.026833	0.221648
yccE	1.12021	2.93759	14.9137	0.0269722	0.221742
sdaB	-0.875536	7.4252	7.39598	0.0269993	0.221742
yeeD	0.863373	10.0098	7.39563	0.027002	0.221742
sdhA	-0.731952	10.3753	7.36588	0.0272283	0.223166
sbmA	-0.563381	4.97357	7.34075	0.0274214	0.224313
nhaR	0.494478	6.47622	7.32235	0.0275639	0.224725
hokB	0.556254	4.78088	7.32051	0.0275782	0.224725
secD	-0.505301	8.55481	7.24393	0.0281819	0.229202
waaZ	0.675101	6.1294	7.21304	0.0284301	0.230776
yoeF	0.731919	3.94383	7.20595	0.0284875	0.230798
tdk	0.512565	6.42391	7.17707	0.0287227	0.232258
yafW	0.601795	5.29675	7.146	0.0289785	0.233878
yehC	-2.90199	2.31595	7.11294	0.029254	0.235651
dsbG	-0.41676	5.89634	7.10249	0.0293417	0.235907
murG	-0.477855	7.60689	7.08683	0.0294738	0.236519
mprA	0.482444	7.69744	7.07437	0.0295795	0.236579
cusR	0.423678	5.80228	7.06778	0.0296356	0.236579
yibG	1.15466	3.56313	7.06616	0.0296494	0.236579
mdaB	0.578231	6.9899	7.04204	0.029856	0.237777
cra	-0.683382	7.5329	7.02309	0.0300195	0.23841
mlaA	0.38503	7.51748	7.01976	0.0300484	0.23841
ydjF	0.869003	4.73436	7.01166	0.0301187	0.23852
yciN	0.570414	9.54918	7.00256	0.030198	0.2387
pdeN	-0.568362	4.46765	12.1171	0.0303963	0.239035
ydeA	0.632958	5.16132	6.97938	0.0304011	0.239035
cyoA	-0.700122	10.8905	6.97835	0.0304103	0.239035
pdeG	0.894125	3.3633	8.16488	0.0306161	0.240205
sieB	1.53204	3.34724	6.90942	0.031025	0.242962
ydaE	2.95802	1.99042	6.90249	0.0310876	0.243002
treA	-0.680496	4.01581	8.05968	0.031355	0.243734
sdhB	-0.707356	10.2054	6.86091	0.0314672	0.243734
mokC	0.676687	4.69604	6.86071	0.031469	0.243734
nlpD	-0.450084	9.22316	6.85954	0.0314798	0.243734
pspA	1.35939	7.10964	6.85558	0.0315162	0.243734
mtlR	0.422477	6.90675	6.8518	0.0315511	0.243734
hybD	-0.482989	5.79635	6.83302	0.031725	0.243734
nikE	-0.956355	3.90099	6.81842	0.0318611	0.243734
oppD	-0.811529	8.99756	6.81807	0.0318643	0.243734
ansB	-1.3777	5.29949	6.81659	0.0318782	0.243734
ygiM	-0.641971	6.59226	6.81651	0.0318789	0.243734
gnsB	0.650019	9.68502	6.80504	0.0319864	0.243734
ddpB	-1.23881	2.60894	12.5561	0.0320595	0.243734
yfjU	0.663492	4.36268	6.78994	0.0321286	0.243734
iscU	0.950561	9.36667	6.7875	0.0321516	0.243734
mraY	-0.597158	7.23494	6.7828	0.0321962	0.243734
yiaG	0.477308	8.02702	6.77774	0.0322441	0.243734
secM	-0.42936	8.44232	6.77608	0.0322598	0.243734
rutA	-1.37147	2.41837	19.0567	0.0323215	0.243734
hybO	-1.6641	6.05178	6.76564	0.0323592	0.243734
napG	-0.883648	4.67216	6.75896	0.0324229	0.243734
ybgE	-0.599773	6.59884	6.75199	0.0324895	0.243734
yihF	0.68629	3.94729	9.7066	0.0325094	0.243734
ypaA	-0.497621	4.79786	6.7387	0.0326173	0.244109
cysN	1.04271	8.32583	6.72572	0.0327425	0.244115
trxC	0.454271	7.93358	6.72414	0.0327578	0.244115
mglC	-1.17529	4.81205	6.71724	0.0328247	0.244115
yghE	-0.446221	6.13224	6.71245	0.0328712	0.244115
yqiH	1.51952	4.29438	6.70496	0.0329441	0.244115
nusB	-0.792364	9.13101	6.70282	0.032965	0.244115
fis	-1.1462	9.75069	6.67046	0.0332827	0.245724
pspB	1.28698	4.23611	6.66884	0.0332988	0.245724
yhhH	0.788875	4.26958	6.65736	0.0334125	0.245744
yegP	0.627181	4.53896	6.65682	0.0334179	0.245744
rpsA	-0.666795	12.0031	6.63849	0.0336005	0.246406
yqfB	0.525097	7.03312	6.63608	0.0336246	0.246406
hisM	-0.556094	5.2315	6.61067	0.0338801	0.247848
yehD	-2.4336	3.56156	6.5948	0.034041	0.248594
ygeI	1.35328	2.49025	10.0715	0.0341672	0.248756
yncL	2.10371	1.85382	6.58105	0.0341811	0.248756
ypeC	0.670791	7.19866	6.57273	0.0342664	0.248947
ychE	0.49349	5.87221	6.54602	0.0345416	0.250516
nirB	-2.21204	5.58408	6.53326	0.0346741	0.25079
lpxP	-0.464841	7.54331	6.53094	0.0346982	0.25079
yibV	1.44044	2.80318	6.52258	0.0347855	0.250973
lysC	-1.01778	5.39572	6.51261	0.0348899	0.250973
galS	-0.669894	4.10538	6.51128	0.0349039	0.250973
hybA	-1.41946	5.49668	6.50581	0.0349614	0.250973
opgH	-0.543403	7.61852	6.49051	0.0351228	0.251703
pheA	-0.511128	5.85636	6.47713	0.0352647	0.251803
yibL	-0.566601	7.46689	6.46299	0.0354155	0.251803
waaO	0.47926	6.77659	6.46004	0.0354471	0.251803
fldB	0.413393	8.29626	6.45787	0.0354704	0.251803
rbsC	-0.986731	7.20393	6.45768	0.0354724	0.251803
ttcA	0.472722	6.73266	6.4556	0.0354946	0.251803
menD	-0.426632	6.60197	6.4359	0.0357068	0.252883
yaaJ	-1.00464	4.61195	6.422	0.0358573	0.253331
yjaB	0.547591	4.78316	6.41433	0.0359407	0.253331
pdxY	0.613246	7.51209	6.41348	0.0359501	0.253331
yjiS	1.05919	2.93412	8.60786	0.0361927	0.254616
creB	-0.415167	5.90358	6.34524	0.0367038	0.257589
gadA	-1.26992	5.84341	6.3377	0.0367883	0.257589
ynaJ	0.465049	10.5572	6.3368	0.0367984	0.257589
priB	-0.931449	10.8105	6.3286	0.0368907	0.257753
phoB	0.750573	5.34873	6.31767	0.0370141	0.257753
gatR	0.414574	6.09125	6.3155	0.0370387	0.257753
fdoI	0.62412	9.50992	6.30983	0.0371029	0.257753
lolB	-0.603981	6.61494	6.30638	0.0371421	0.257753
sufA	1.02768	4.89615	6.30233	0.0371882	0.257753
ygeK	1.14161	2.76631	13.5912	0.0375568	0.259881
yraN	-0.394582	6.17406	6.26152	0.0376563	0.260124
rbsD	-0.914203	9.05132	6.25159	0.0377714	0.260124
secF	-0.45963	8.32817	6.24689	0.037826	0.260124
yecF	0.544118	7.53664	6.24005	0.0379057	0.260124
hybB	-1.1878	4.52973	6.2386	0.0379226	0.260124
btsR	-0.636591	5.39323	6.23525	0.0379617	0.260124
ravA	-1.15567	5.55051	6.21768	0.0381678	0.261112
ymgA	0.963435	6.45372	6.20644	0.0383003	0.2613
dgcJ	0.767314	3.93922	6.20486	0.038319	0.2613
ttdR	-1.64246	3.73767	6.19409	0.0384467	0.261747
yjfN	-0.473468	4.81833	7.61276	0.0386076	0.261918
ppnN	-0.515537	6.73496	6.17678	0.038653	0.261918
ymgC	1.09938	5.78175	6.17637	0.0386578	0.261918
yfeY	0.389489	6.26419	6.16301	0.038818	0.2623
ebgR	-0.62469	5.18911	6.15493	0.0389153	0.2623
lgt	-0.60486	7.24961	6.14362	0.0390521	0.2623
yebO	0.458211	9.71374	6.14294	0.0390602	0.2623
rhtC	-0.654637	6.98961	6.13867	0.0391121	0.2623
cdgI	-1.07737	2.82355	6.13715	0.0391305	0.2623
ydcH	0.5059	6.1868	6.13561	0.0391493	0.2623
ydeP	1.21423	2.62737	13.7034	0.0394796	0.263753
hybE	-0.504111	5.46183	6.10293	0.039549	0.263753
gstA	0.560859	5.86683	6.09981	0.0395874	0.263753
yafU	1.23225	2.68097	6.09187	0.0396855	0.263753
ynaK	0.768212	3.83748	6.08738	0.0397411	0.263753
rcnB	0.379612	7.31238	6.08246	0.0398021	0.263753
mlc	-0.551681	4.99441	6.08234	0.0398036	0.263753
ybhB	0.552494	8.22523	6.06582	0.0400094	0.264285
yfbS	-0.853942	4.86268	6.06158	0.0400624	0.264285
yjiA	-0.474532	5.75671	6.06084	0.0400717	0.264285
uspC	-0.883038	5.29503	6.02326	0.0405457	0.266533
ybfC	1.01425	3.01434	6.0186	0.040605	0.266533
dacB	-0.510934	5.68695	6.0151	0.0406497	0.266533
fecR	-0.649445	8.00753	6.00981	0.0407172	0.266533
rzoD	1.47323	3.81645	6.00426	0.0407882	0.266533
yhhI	0.964127	3.27201	6.00385	0.0407934	0.266533
rplT	-0.586412	12.2635	5.99908	0.0408546	0.266533
umuD	0.753683	6.75981	5.9835	0.0410552	0.267429
rcbA	1.2163	2.60673	12.9369	0.0411745	0.267793
rplP	-0.779055	11.8229	5.95525	0.0414221	0.268989
ynfD	-0.649962	3.98959	5.98686	0.0416789	0.270241
yfjW	0.434184	5.12153	5.91736	0.041921	0.27085
yecH	-1.29656	5.92628	5.91479	0.041955	0.27085
appA	-1.27383	6.15748	5.90958	0.0420243	0.27085
waaL	0.49725	8.12301	5.90683	0.0420609	0.27085
yajG	-0.510193	8.53983	5.90437	0.0420938	0.27085
ydjX	-0.928928	3.93465	5.87622	0.0424713	0.272265
hemG	0.342751	6.93803	5.87386	0.0425031	0.272265
cheY	0.919859	3.16393	10.7734	0.0425606	0.272265
sufB	0.899371	5.17283	5.86879	0.0425716	0.272265
dsbA	0.597261	9.14911	5.86296	0.0426506	0.272283
yhiJ	0.944947	3.10563	5.85907	0.0427034	0.272283
nohD	-1.32602	2.37015	13.2866	0.0428381	0.27273
infB	-0.553342	9.54703	5.83799	0.0429909	0.272976
rpoZ	0.526197	9.41654	5.8344	0.0430402	0.272976
sthA	-0.587618	9.6639	5.82778	0.0431311	0.272976
rsxA	0.550318	5.98806	5.8235	0.04319	0.272976
rlmE	0.39863	8.98682	5.82116	0.0432224	0.272976
yghB	-0.365275	6.24923	5.81547	0.0433009	0.272976
ydeS	1.37825	2.36149	6.09284	0.0433582	0.272976
ygeH	1.23895	2.54986	7.92609	0.0433942	0.272976
ydeR	1.43445	2.29426	8.30374	0.0435044	0.273262
rbfA	-0.500338	7.8432	5.78632	0.0437064	0.27374
elaA	0.390739	5.65619	5.78605	0.0437101	0.27374
cysH	0.883479	8.58022	5.77077	0.0439246	0.274511
ycbK	-0.430135	7.99377	5.75844	0.0440987	0.274511
yajD	0.449967	7.56064	5.7573	0.0441148	0.274511
caiA	0.584505	5.05198	5.74825	0.0442432	0.274511
lysU	-0.486326	9.0326	5.74779	0.0442498	0.274511
yhdT	-0.695093	5.75882	5.74097	0.0443469	0.274511
yjiH	-2.57434	3.91626	5.74041	0.0443549	0.274511
gor	0.516053	7.78335	5.73901	0.0443748	0.274511
hypF	-0.686378	3.7523	5.73594	0.0444186	0.274511
tesA	-0.530358	5.91541	5.72914	0.0445159	0.27471
yajC	-0.454381	9.48514	5.71977	0.0446503	0.27492
nfsA	0.366841	5.87988	5.7177	0.0446802	0.27492
sufC	0.988042	5.05712	5.71256	0.0447543	0.274975
yneE	0.461108	5.01483	5.6709	0.0453604	0.278294
pstS	0.594373	6.66704	5.65951	0.0455278	0.278703
pspG	1.04618	4.46489	5.65738	0.0455592	0.278703
yqcA	-0.40948	6.55131	5.64376	0.0457608	0.279263
fimI	-0.524582	11.1648	5.63901	0.0458313	0.279263
rapZ	-0.597346	7.63101	5.63196	0.0459363	0.279263
mglA	-1.19827	4.82051	5.63038	0.0459599	0.279263
mdtE	-1.3004	5.76365	5.62606	0.0460244	0.279263
nuoM	-0.757355	8.65618	5.62153	0.0460923	0.279263
wrbA	-0.638125	6.85375	5.62009	0.0461139	0.279263
yliI	-0.697656	3.67105	5.81253	0.0462848	0.279648
gntR	-0.357447	7.01029	5.60704	0.0463099	0.279648
ykgH	1.1383	4.18833	5.57654	0.0467724	0.281797
hokA	0.608964	4.9809	5.57478	0.0467992	0.281797
ycaO	-0.606014	6.81869	5.56837	0.0468974	0.281985
potH	-0.701484	3.66556	8.15312	0.0471181	0.28291
amyA	0.40491	5.53853	5.54626	0.0472376	0.283131
ydfO	0.87205	3.21499	7.6375	0.0473459	0.283131
cyuA	0.620126	4.01945	6.56362	0.0474018	0.283131
nupG	-0.611489	4.46666	5.53428	0.0474232	0.283131
ysgA	-0.541782	5.25468	5.52399	0.0475834	0.283686
yfdF	0.852157	3.47929	5.50589	0.0478669	0.283856
ybjG	-0.447073	7.25259	5.50262	0.0479182	0.283856
hprS	0.585134	4.86921	5.49823	0.0479874	0.283856
tatB	-0.510167	8.64801	5.49609	0.0480212	0.283856
tisB	2.43383	1.58534	13.6934	0.0480515	0.283856
minC	-0.459544	7.79605	5.49101	0.0481014	0.283856
ykfJ	1.24736	3.2702	5.4878	0.0481523	0.283856
ybjD	-0.39206	5.30993	5.48603	0.0481803	0.283856
metQ	-0.429292	7.18622	5.48371	0.0482171	0.283856
rbsR	-0.481356	5.513	5.47746	0.0483164	0.284044
yhhM	0.478317	6.17156	5.47249	0.0483956	0.284114
yjjA	0.423431	7.33244	5.44524	0.0488326	0.286281
yqhH	-0.653803	3.84376	6.18325	0.0490031	0.286378
ycfP	-0.744773	8.05966	5.43441	0.0490077	0.286378
fetA	-0.455166	5.265	5.43164	0.0490526	0.286378
mutH	0.638998	4.62126	5.41976	0.0492457	0.286846
hflD	-0.703623	7.77256	5.41734	0.0492853	0.286846
holA	-0.413342	7.29224	5.41419	0.0493367	0.286846
ycdZ	0.44379	7.09125	5.40525	0.049483	0.287081
cedA	0.420885	6.0378	5.39954	0.0495769	0.287081
yodD	0.664585	5.44554	5.39621	0.0496316	0.287081
yecJ	-0.76346	7.71803	5.39515	0.0496491	0.287081
cobC	-0.539136	5.75553	5.38755	0.0497746	0.287413
yoaA	0.421073	5.93386	5.37838	0.0499263	0.287895
ydiV	0.493904	5.40352	5.37115	0.0500466	0.288194
araC	-0.40467	6.88834	5.36436	0.0501597	0.288453
yfaE	0.773064	9.17909	5.32275	0.0508606	0.291351
rplF	-0.702653	12.347	5.32075	0.0508946	0.291351
ybhK	0.410595	5.86361	5.32068	0.0508957	0.291351
yfeK	0.474096	4.8431	5.31809	0.0509398	0.291351
ydfC	0.755432	4.14797	5.31091	0.0510622	0.291656
trmI	0.464851	7.68033	5.28456	0.0515149	0.293323
lpxD	-0.549266	9.82956	5.28446	0.0515167	0.293323
pagP	-0.866126	4.56913	5.2818	0.0515625	0.293323
plsC	-0.456979	6.33455	5.27234	0.0517265	0.293393
cobU	0.546342	5.44921	5.2721	0.0517306	0.293393
iscA	0.773731	10.1234	5.26907	0.0517834	0.293393
yodC	0.364685	5.73513	5.25698	0.0519941	0.293616
yeaQ	0.472903	9.43818	5.25582	0.0520144	0.293616
curA	0.548028	5.0918	5.25108	0.0520975	0.293616
dinF	0.539291	5.94444	5.24963	0.0521229	0.293616
yigL	0.43913	7.15703	5.24515	0.0522016	0.293616
hypE	-0.789267	4.66808	5.23882	0.0523128	0.293616
gpp	-0.451286	6.86924	5.23578	0.0523664	0.293616
hslO	0.507704	6.87244	5.23506	0.0523792	0.293616
ybgU	0.745029	5.18903	5.22967	0.0524744	0.293759
ytfI	0.988592	3.6448	5.21941	0.0526562	0.294387
yoaL	0.811519	5.01364	5.21468	0.0527404	0.294467
lptF	-0.360123	7.5623	5.20482	0.0529163	0.294772
deoC	-0.596793	5.98954	5.19663	0.053063	0.294772
ybbC	0.747733	5.31644	5.18874	0.0532048	0.294772
cvrA	-0.523778	4.87085	5.188	0.0532182	0.294772
pspC	0.86085	4.68043	5.18682	0.0532394	0.294772
yqiG	1.02291	3.45043	5.18539	0.0532651	0.294772
atl	-0.643197	5.01235	5.18436	0.0532839	0.294772
nrfB	-1.64103	3.8018	5.17134	0.0535194	0.294841
yebG	0.472501	8.88904	5.16907	0.0535606	0.294841
yeaH	-0.528496	4.36193	5.16906	0.0535607	0.294841
rnpA	-0.966916	9.52757	5.16823	0.0535758	0.294841
shiA	-0.393807	5.79321	5.15149	0.0538811	0.295501
elfA	0.958292	3.10305	5.14596	0.0539824	0.295501
pcnB	-0.487221	8.13239	5.13002	0.0542757	0.295501
xthA	0.469693	7.46827	5.12899	0.0542947	0.295501
dxs	-0.405023	7.46423	5.12526	0.0543638	0.295501
alsR	0.334506	6.0151	5.12518	0.0543653	0.295501
lpxM	0.347565	6.61944	5.12274	0.0544104	0.295501
ydbA	0.476598	4.79384	5.11751	0.0545074	0.295501
ybeD	0.703698	8.94777	5.11471	0.0545596	0.295501
pspD	0.998667	3.55493	5.11427	0.0545677	0.295501
pitA	-0.487182	8.31579	5.11333	0.0545851	0.295501
nudE	0.401612	8.84609	5.1097	0.0546527	0.295501
idnT	-0.80875	3.25695	7.68504	0.0546707	0.295501
rcnA	0.767068	3.6562	5.10775	0.0546891	0.295501
pdxH	-0.421408	6.65499	5.10471	0.0547458	0.295501
rimK	0.353653	6.2775	5.09244	0.0549756	0.296347
fur	0.436616	10.1711	5.08886	0.0550429	0.296347
hupB	-0.449888	10.6826	5.07572	0.0552907	0.297302
ydfB	1.37384	2.36547	5.06881	0.0554218	0.297628
uvrD	0.371448	7.72831	5.05806	0.0556261	0.297893
yghJ	-0.504933	5.85726	5.05607	0.0556642	0.297893
mnmC	0.361174	5.46048	5.05509	0.0556828	0.297893
pbl	1.49456	2.12963	5.50139	0.0557902	0.298089
cbtA	0.816082	3.28278	8.62532	0.0560492	0.299095
ylaC	0.350342	7.09405	5.03088	0.0561475	0.299224
yrfG	0.457035	6.90675	5.02738	0.0562152	0.299224
pncC	0.359588	6.11805	5.01578	0.0564399	0.299751
yfdH	0.445617	5.79775	5.01493	0.0564563	0.299751
dtpA	-0.431656	6.69151	5.01102	0.0565325	0.299778
pdxA	-0.483668	7.63863	5.00619	0.0566265	0.2999
ydcL	0.393299	6.18541	4.98225	0.0570961	0.3018
yfeC	-0.467381	6.55537	4.98062	0.0571282	0.3018
yeiI	0.394077	5.70863	4.96943	0.0573495	0.30259
rhlB	-0.532692	8.82252	4.95413	0.057654	0.303564
dosC	1.10339	2.64156	17.488	0.057678	0.303564
ppc	-0.70033	7.55017	4.94382	0.0578602	0.303787
sucD	-0.655792	10.6963	4.94161	0.0579045	0.303787
frmA	0.587737	6.67574	4.93513	0.0580348	0.303787
rpnB	0.621898	4.06439	4.93178	0.0581024	0.303787
kbp	0.470195	7.37484	4.93125	0.058113	0.303787
ibaG	0.386975	8.3759	4.92932	0.058152	0.303787
yhgN	0.585051	5.55406	4.92375	0.0582645	0.303998
waaB	0.432869	6.87796	4.91645	0.0584125	0.304394
pnp	-0.501079	9.77787	4.89379	0.0588748	0.305968
pheT	-0.407893	8.11107	4.89114	0.0589292	0.305968
yjgM	-0.592672	6.01303	4.891	0.058932	0.305968
uvrA	0.363353	7.11027	4.88338	0.0590888	0.306405
orn	0.404412	7.48036	4.87141	0.0593361	0.307035
hisP	0.342171	5.87222	4.87046	0.0593558	0.307035
ihfA	0.439101	10.2958	4.8554	0.0596689	0.308
ybdD	0.640359	3.7944	7.29792	0.0596882	0.308
rpsJ	-0.608359	12.3831	4.84428	0.0599017	0.308724
artQ	-0.413233	6.48254	4.83846	0.0600239	0.308835
rpsE	-0.683395	12.0433	4.83478	0.0601013	0.308835
dcuC	-1.21669	3.4891	4.83281	0.0601428	0.308835
tsaE	0.330863	6.12736	4.82736	0.0602579	0.309051
ybjJ	0.578052	4.61223	4.82223	0.0603663	0.309231
ptsN	-0.400013	7.89808	4.8151	0.0605177	0.30961
ytiA	-0.639764	3.74424	6.83882	0.0605942	0.30961
metC	-0.506926	4.59883	4.80839	0.0606604	0.30961
ygiV	-0.493724	5.38381	4.79256	0.0609989	0.310962
umuC	0.606656	6.57573	4.7831	0.0612026	0.311417
marC	0.526973	5.28299	4.7787	0.0612974	0.311417
rplW	-0.620076	12.1057	4.77815	0.0613095	0.311417
rpsB	-0.572133	11.4678	4.7742	0.0613947	0.311475
yobD	-0.800756	5.14507	4.76679	0.0615554	0.311915
eptB	-0.392784	5.51045	4.76212	0.0616571	0.312056
arnE	-0.698624	3.56516	6.07136	0.0619227	0.312082
torR	0.509925	4.73037	4.74931	0.0619366	0.312082
fusA	-0.607644	12.5222	4.74668	0.0619943	0.312082
treB	-1.11411	6.37941	4.74548	0.0620206	0.312082
ycdX	0.315692	7.54794	4.73783	0.0621886	0.312082
yniB	0.406642	6.47859	4.73473	0.0622569	0.312082
fumC	0.516665	6.01234	4.73373	0.0622789	0.312082
brnQ	-0.501592	6.92824	4.73191	0.0623192	0.312082
uxuB	0.668309	4.01269	4.73152	0.0623277	0.312082
accB	-0.548513	9.29942	4.71983	0.0625863	0.312895
bamA	-0.483505	9.15118	4.71749	0.0626383	0.312895
greB	-0.424217	5.63683	4.70113	0.0630032	0.314346
yfhL	0.868591	6.33157	4.6812	0.0634512	0.316207
yahD	0.796939	3.51861	4.66893	0.0637291	0.317218
pdeL	0.892405	6.48381	4.66315	0.0638606	0.317472
ykgV	0.507145	4.36687	6.66276	0.0639659	0.317472
nepI	0.343299	5.85906	4.65678	0.0640058	0.317472
argR	-0.3764	8.02924	4.64474	0.0642816	0.318465
puuB	-0.500268	4.87131	4.61489	0.0649718	0.321464
proY	-0.414449	6.78855	4.61201	0.0650391	0.321464
rplO	-0.660505	12.1785	4.60704	0.0651549	0.32166
viaA	-0.610667	5.6077	4.58877	0.0655837	0.321788
glcD	-1.38542	5.22794	4.58855	0.0655891	0.321788
rpoE	0.440101	8.52836	4.58635	0.0656409	0.321788
yhaC	1.27987	2.31404	12.2072	0.0657141	0.321788
nudG	0.443787	4.73192	6.42566	0.0657391	0.321788
tusC	-0.51477	6.54941	4.58102	0.0657668	0.321788
murQ	-0.655486	3.65766	10.7308	0.0658415	0.321788
cpdA	-0.358165	7.38203	4.57663	0.0658709	0.321788
hslR	0.49729	6.77232	4.57548	0.065898	0.321788
ybcF	-0.640677	3.7787	6.21215	0.0659433	0.321788
dmsC	-0.625336	4.21518	4.56999	0.0660285	0.321832
yedL	-1.04619	3.16876	4.54832	0.0665463	0.323758
ydiH	-0.97263	7.61808	4.54704	0.0665771	0.323758
rplR	-0.653752	11.9595	4.54224	0.0666924	0.323814
mobB	0.44422	5.12656	4.54018	0.066742	0.323814
yjbM	1.14675	2.49543	6.28735	0.066895	0.324184
yhiD	-1.04719	7.07856	4.52923	0.0670068	0.32433
nuoL	-0.62308	8.97036	4.52626	0.0670788	0.32433
csdE	0.319007	6.90049	4.52104	0.0672057	0.324571
feoC	-0.750147	5.9452	4.51333	0.0673936	0.325107
rpmE	-0.530297	11.1981	4.50598	0.0675733	0.325291
ybbD	0.761843	4.06006	4.50546	0.067586	0.325291
rfbD	-0.569237	8.0648	4.49993	0.0677215	0.325572
truB	-0.513749	7.87174	4.47291	0.0683897	0.328245
aroL	0.304592	6.95233	4.47117	0.068433	0.328245
fdhE	0.497744	8.84872	4.46536	0.0685779	0.328567
cyoD	-0.500986	10.2255	4.45953	0.0687236	0.328891
nlpC	0.378316	6.48079	4.44619	0.0690587	0.330121
yjbQ	-0.492868	6.90436	4.43994	0.0692163	0.3305
hcr	-1.45692	3.08177	4.42296	0.069647	0.331562
yafV	-0.505436	5.22906	4.42276	0.069652	0.331562
yecA	0.426763	7.24694	4.41925	0.0697415	0.331562
rsxE	-0.578433	5.08329	4.41365	0.0698848	0.331562
ycdU	1.11975	2.51702	4.41016	0.0699742	0.331562
yibS	0.80883	3.26463	4.40934	0.069995	0.331562
acrD	-0.525235	4.16597	6.78779	0.07002	0.331562
yhhS	-0.48932	5.78629	4.40653	0.0700672	0.331562
insA-7	0.55288	5.74063	4.39582	0.0703428	0.331706
zapC	-0.561762	6.24923	4.3942	0.0703847	0.331706
yliM	1.6187	1.94697	4.39321	0.0704102	0.331706
pqqL	0.70414	5.07244	4.38895	0.0705204	0.331706
selA	-0.361175	6.52204	4.38517	0.0706182	0.331706
narP	0.381113	7.05165	4.38476	0.070629	0.331706
pdxI	-0.637083	3.6736	5.44013	0.0706476	0.331706
ycbJ	-0.986897	5.25454	4.3721	0.0709582	0.332794
appC	-1.39366	7.11152	4.3652	0.0711386	0.33327
rlmD	-0.301073	6.71	4.35777	0.0713333	0.3336
rpsD	-0.629175	12.1697	4.35648	0.0713673	0.3336
norR	0.573292	4.45643	4.352	0.0714852	0.333782
intF	0.654207	6.438	4.34336	0.0717132	0.334477
gcvA	-0.37461	5.43085	4.32984	0.072072	0.335488
rmf	0.816985	9.02006	4.32921	0.0720889	0.335488
mug	0.4249	5.96675	4.32377	0.0722339	0.335792
ratA	0.348804	8.04444	4.31636	0.0724321	0.336343
nuoK	-0.581867	8.14379	4.31137	0.0725662	0.336595
yegJ	1.03117	2.70456	4.3075	0.0726702	0.336708
betB	0.38702	6.72461	4.30039	0.0728617	0.336982
dsdC	0.601272	3.81746	4.82418	0.0728891	0.336982
oppB	-0.614558	8.84359	4.27999	0.0734152	0.339043
mlaD	-0.364519	7.1841	4.27615	0.0735201	0.339157
lysS	-0.538338	9.26123	4.27188	0.0736369	0.339325
opgG	-0.419515	7.66928	4.26707	0.0737688	0.339486
murP	-0.652137	3.59446	7.9832	0.0738327	0.339486
ydeI	0.527403	4.13641	4.97626	0.074236	0.340969
ybjS	-0.379724	6.34031	4.24691	0.0743245	0.341004
nuoC	-0.491473	9.07604	4.23849	0.0745584	0.341645
citC	0.908312	2.89692	5.59444	0.0746261	0.341645
yeiR	0.398543	5.15518	4.23129	0.074759	0.341883
yciV	0.356857	6.11134	4.22806	0.0748491	0.341925
argD	-0.341025	5.58195	4.21608	0.075185	0.342141
yedN	1.71162	1.82616	10.6156	0.0752835	0.342141
ybcY	1.24064	3.49245	4.20956	0.0753687	0.342141
bioP	0.579691	8.10604	4.20919	0.0753793	0.342141
ypeB	-0.391922	6.11873	4.20898	0.0753852	0.342141
ybhP	-0.498571	4.29135	4.20586	0.0754733	0.342141
prs	-0.628399	10.0712	4.2047	0.0755061	0.342141
rplA	-0.612238	12.035	4.20104	0.0756097	0.342141
ycgB	-0.5039	4.27614	4.20046	0.075626	0.342141
torI	0.796393	3.16673	7.56182	0.0765802	0.345864
ndh	0.901599	7.69497	4.16592	0.0766129	0.345864
yqeI	0.630334	3.68259	5.22048	0.0771854	0.346216
dmlR	-0.560593	3.93187	6.37834	0.0772208	0.346216
rodZ	-0.387813	7.982	4.14318	0.077272	0.346216
hipB	0.756481	3.68298	4.13869	0.0774029	0.346216
adiC	-0.89118	3.94582	4.1356	0.0774933	0.346216
yhjV	-0.441134	5.68344	4.13434	0.07753	0.346216
yhhA	0.325318	5.80826	4.12718	0.0777398	0.346216
frvX	0.713848	3.39533	9.39378	0.0777482	0.346216
yeiH	-0.457109	4.52383	7.04958	0.0777493	0.346216
mazF	0.350916	6.75655	4.12679	0.0777513	0.346216
ltaE	0.345833	6.14856	4.12457	0.0778167	0.346216
fimC	-0.442595	10.1697	4.12313	0.0778589	0.346216
arcA	0.377486	5.11851	4.12248	0.077878	0.346216
yfiM	-0.434134	7.96324	4.12152	0.0779064	0.346216
ydeO	1.60415	1.89561	7.84799	0.0779213	0.346216
metA	0.882783	3.04432	4.11752	0.0780243	0.34631
clcA	-0.43748	5.35836	4.11411	0.078125	0.346392
sufD	0.847797	5.31681	4.11051	0.0782315	0.346501
ribA	0.3627	7.71974	4.10747	0.0783215	0.346536
opgD	0.331745	6.08978	4.1002	0.0785374	0.346746
yahL	1.33592	3.45192	4.09774	0.0786109	0.346746
cueR	-0.346669	6.43522	4.09378	0.078729	0.346746
yibQ	-0.37549	5.96874	4.09224	0.0787747	0.346746
fes	-0.690385	6.9417	4.09002	0.0788411	0.346746
msrQ	0.608892	3.76038	6.76887	0.0789064	0.346746
bamD	-0.329428	8.77751	4.08658	0.0789442	0.346746
ydaG	0.866604	3.25374	4.08029	0.0791329	0.347075
yobB	-0.418738	4.72572	6.38021	0.0791835	0.347075
ydhP	0.415066	4.9642	4.07263	0.0793635	0.347218
aroG	-0.470318	7.33421	4.07206	0.0793806	0.347218
rplL	-0.596009	13.2362	4.06798	0.0795039	0.347257
emrE	0.447921	6.10372	4.06632	0.079554	0.347257
glpQ	-0.635668	7.01559	4.0449	0.0802056	0.349739
yjgR	0.350236	5.20535	4.95869	0.0804452	0.349953
ydfG	0.35725	7.81707	4.03671	0.0804567	0.349953
ompF	-0.462222	9.28725	4.03519	0.0805032	0.349953
smrB	0.292733	6.61121	4.02229	0.0809012	0.351321
queD	0.442723	7.20008	4.0173	0.0810556	0.351467
bolA	0.416119	8.14082	4.01582	0.0811013	0.351467
rpmJ	-0.619233	10.3678	3.99994	0.081596	0.352954
ychO	-0.432067	4.66797	3.99641	0.0817064	0.352954
cas2	0.563007	3.96902	7.65638	0.0817712	0.352954
yeaD	-0.755269	5.97345	3.99409	0.0817791	0.352954
htpX	0.459413	7.88883	3.98758	0.0819838	0.353136
ydcC	1.10961	2.45568	8.19713	0.0819884	0.353136
yjgX	-0.308799	5.87519	3.97595	0.0823507	0.353954
yncO	0.49724	5.48833	3.97512	0.082377	0.353954
ycbX	-0.372964	5.72308	3.97289	0.0824476	0.353954
tauB	0.751474	3.2583	8.79981	0.0825161	0.353954
accC	-0.506047	9.46308	3.96816	0.0825977	0.353954
eutB	-0.345547	6.96714	3.95811	0.0829176	0.354965
ykfF	-0.326481	5.34711	3.95993	0.0831912	0.355326
ydbK	0.50173	6.22766	3.94777	0.0832486	0.355326
rph	0.635229	8.30391	3.94759	0.0832544	0.355326
yceQ	0.432347	7.05736	3.94207	0.083432	0.355724
ydaY	0.546502	3.95363	4.74434	0.0835716	0.355959
folD	-0.618669	8.55955	3.9267	0.0839286	0.356771
pqiC	0.365446	6.91665	3.92662	0.0839312	0.356771
rpsL	-0.512575	12.7123	3.92171	0.0840908	0.356839
yiaA	0.859798	3.16502	3.9206	0.0841268	0.356839
ydeM	1.68876	1.79812	11.2726	0.0842009	0.356839
gloB	0.338905	5.81133	3.91423	0.0843342	0.357046
wzyE	-0.47424	5.53996	3.89809	0.0848633	0.358743
yojI	0.363552	6.44022	3.89682	0.0849051	0.358743
xisR	1.63409	1.83594	8.21286	0.084996	0.358768
gstB	-0.464023	6.39716	3.88716	0.0852238	0.359341
yjgH	0.597384	3.79082	9.5989	0.0853019	0.359341
lamB	-0.788383	3.08499	12.577	0.0855692	0.360107
lon	0.481907	8.56311	3.8703	0.0857842	0.360499
nudI	0.38576	4.89936	4.61199	0.0858331	0.360499
folA	0.529025	8.28585	3.86421	0.0859876	0.360789
dppB	-0.665871	5.15556	3.85455	0.086312	0.361127
tolQ	-0.434094	7.83353	3.85374	0.0863392	0.361127
bcsG	-0.443334	5.90288	3.85361	0.0863435	0.361127
yhaV	0.458048	6.55369	3.84916	0.0864934	0.361127
maeA	-0.332362	7.50913	3.84909	0.0864959	0.361127
uspA	-0.670388	7.56027	3.84599	0.0866003	0.361206
yncJ	1.1047	4.89393	3.82336	0.0873695	0.363851
hicB	0.427601	4.71964	3.82226	0.0874069	0.363851
yjhU	0.322919	7.19631	3.80277	0.0880767	0.365859
ynfN	1.26666	2.85909	3.80276	0.088077	0.365859
lgoR	-0.956399	2.64517	19.8639	0.0882783	0.365859
yrdB	0.383461	8.04363	3.79468	0.0883565	0.365859
tsf	-0.660069	10.9223	3.79395	0.088382	0.365859
hmp	0.434585	5.4409	3.79316	0.0884094	0.365859
menH	-0.41307	5.82825	3.78221	0.0887905	0.366676
fdnG	-1.171	3.43685	3.77527	0.0890331	0.366676
waaY	0.437463	5.93548	3.77448	0.0890608	0.366676
artJ	-0.454955	4.39238	5.85044	0.0890757	0.366676
rfaE	0.454992	7.84341	3.77299	0.089113	0.366676
ychJ	0.270971	6.99713	3.77256	0.0891281	0.366676
appB	-1.23541	6.85546	3.76669	0.0893344	0.366894
chbB	0.402664	5.0252	3.76611	0.0893548	0.366894
pta	-0.460342	8.2948	3.75633	0.0896997	0.367302
yjhC	0.40727	5.9448	3.75494	0.089749	0.367302
ytfP	0.529358	6.32675	3.75394	0.0897845	0.367302
sspA	-0.395299	9.33386	3.75343	0.0898023	0.367302
iadA	-0.361962	6.79302	3.74279	0.0901804	0.368004
ppiA	-0.398233	8.54904	3.74217	0.0902025	0.368004
gltP	-0.306044	6.77321	3.74009	0.0902764	0.368004
yebE	0.737737	6.03557	3.73879	0.0903228	0.368004
pepN	-0.3983	7.66105	3.73635	0.0904101	0.368005
ydbL	0.384853	5.23529	3.72757	0.0907245	0.36869
rplV	-0.582727	12.1334	3.72611	0.090777	0.36869
zwf	0.361425	8.02881	3.72367	0.0908644	0.36869
degQ	0.368028	5.63023	3.72191	0.0909278	0.36869
talB	0.345036	9.53454	3.7189	0.0910363	0.368704
yijE	-0.373043	4.82176	4.03366	0.0912664	0.368704
ykfM	0.831359	2.94881	3.78407	0.0913761	0.368704
sucA	-0.57117	10.2878	3.70639	0.0914887	0.368704
tcyN	0.541107	6.24347	3.7047	0.0915503	0.368704
mdfA	-0.391585	5.56196	3.70171	0.0916587	0.368704
speD	-0.559101	7.65111	3.70075	0.0916939	0.368704
wzzB	0.411404	9.57164	3.69915	0.0917522	0.368704
syd	0.300906	6.62007	3.6987	0.0917686	0.368704
msrB	-0.301962	8.54067	3.69771	0.0918046	0.368704
glsB	0.332684	6.19718	3.69484	0.0919092	0.368773
gldA	-0.82196	4.56776	3.6899	0.0920896	0.369146
yzfA	0.412789	8.32857	3.68291	0.0923461	0.369339
secY	-0.574339	12.4039	3.6828	0.09235	0.369339
gpr	-0.440261	4.48962	6.5687	0.0924058	0.369339
entH	0.659249	7.65868	3.67905	0.0924878	0.369339
dusC	0.519533	5.31655	3.67416	0.0926682	0.369709
tsgA	0.753684	7.13439	3.67113	0.0927801	0.369806
rplD	-0.58454	12.2908	3.66865	0.0928719	0.369823
narH	-1.37861	3.84923	3.66193	0.093121	0.370466
nuoB	-0.407153	9.3648	3.65384	0.0934221	0.370644
leuE	0.419641	5.5275	3.65341	0.093438	0.370644
mscK	-0.282817	6.80035	3.65282	0.0934601	0.370644
lpxT	-0.421576	5.58758	3.65129	0.0935172	0.370644
dusA	0.417855	7.6725	3.64552	0.0937329	0.371151
paoD	0.572949	4.29485	3.64056	0.093919	0.371381
eptC	-0.516865	6.88727	3.63928	0.093967	0.371381
rseP	-0.347626	8.65841	3.63463	0.0941419	0.371724
rpsQ	-0.531746	12.7463	3.62156	0.094636	0.372567
hslU	0.618058	8.51814	3.61927	0.0947227	0.372567
casA	0.704437	3.33671	3.61833	0.0947586	0.372567
yhhN	-0.454943	5.18307	3.61696	0.0948107	0.372567
ydeJ	0.53636	4.02192	3.6156	0.0948624	0.372567
tehB	0.424383	6.18672	3.615	0.094885	0.372567
metJ	0.361716	8.02785	3.61013	0.0950706	0.372776
gspM	0.522518	4.24208	3.60897	0.095115	0.372776
sanA	-0.367849	4.8359	3.85107	0.0953447	0.37333
ybjC	0.325638	5.26618	3.82535	0.0954331	0.37333
ynjA	-0.693414	3.89766	3.59139	0.0957892	0.374376
ydgK	0.301237	6.92066	3.58526	0.0960257	0.374953
ygiZ	1.50512	2.32649	3.57474	0.0964336	0.376198
yqeJ	0.718332	3.24291	6.1345	0.0967729	0.377143
ybjQ	0.341821	6.36943	3.56394	0.0968544	0.377143
skp	-0.421776	10.0557	3.55377	0.0972531	0.378346
dmsB	-0.948859	3.36048	3.539	0.0978356	0.380262
ybjH	0.390882	5.75483	3.53367	0.0980473	0.38055
rof	0.432647	7.30858	3.53259	0.0980901	0.38055
pyrE	0.550631	7.9554	3.52927	0.098222	0.380712
ynfE	-1.00896	3.00585	3.5234	0.0984563	0.381112
epmA	-0.520528	5.75728	3.52058	0.098569	0.381112
rraB	0.408547	10.6203	3.5192	0.0986242	0.381112
mdtG	-0.564357	3.76374	7.8052	0.0986864	0.381112
yfeN	0.75491	3.10719	4.81729	0.0988544	0.381125
ypjF	0.912525	2.71596	7.59962	0.0988704	0.381125
ppiD	-0.315797	8.47052	3.50276	0.0992849	0.382374
adiA	-0.513862	4.3522	3.49288	0.0996851	0.383565
yebY	0.266964	7.05553	3.48124	0.100159	0.385037
gapA	-0.698764	11.5875	3.47882	0.100258	0.385067
dusB	-0.585002	9.12344	3.47555	0.100392	0.385133
glnS	-0.444397	8.95888	3.47394	0.100457	0.385133
thyA	-0.493685	7.68561	3.46439	0.10085	0.385913
artP	-0.448258	6.6221	3.46019	0.101024	0.385913
yqjG	0.354516	4.96268	4.545	0.101084	0.385913
gsiD	0.471215	5.79421	3.45817	0.101107	0.385913
yjaH	-0.394305	6.08027	3.45627	0.101186	0.385913
dsbB	0.302608	7.21284	3.45569	0.10121	0.385913
ygaP	0.393605	4.79429	3.45073	0.101415	0.386348
gltB	-0.962912	6.78424	3.44818	0.101521	0.386381
ygbI	0.360853	5.63341	3.44481	0.101661	0.386381
galF	0.439244	9.54585	3.44392	0.101699	0.386381
yfiP	-0.491594	5.22323	3.43167	0.102211	0.387654
yjiX	-0.468155	4.20929	3.43151	0.102217	0.387654
yeaG	-0.428257	5.9081	3.42075	0.10267	0.388099
ydhB	0.376585	4.80923	3.41738	0.102812	0.388099
phoA	-0.592631	4.85196	3.411	0.103082	0.388099
gspA	0.739476	3.12441	5.28696	0.103142	0.388099
pyrF	0.457901	6.87529	3.40759	0.103227	0.388099
fhuA	-0.297829	9.05409	3.4049	0.103341	0.388099
elaD	0.823523	2.89165	4.69219	0.103342	0.388099
ygjP	0.306674	5.31843	3.57258	0.103429	0.388099
murB	0.31932	7.82554	3.40237	0.103449	0.388099
folB	0.449727	6.72715	3.40219	0.103457	0.388099
napH	-0.649436	4.53433	3.40014	0.103544	0.388099
eno	-0.540172	11.0636	3.40014	0.103544	0.388099
tdh	0.50287	9.1995	3.39807	0.103632	0.388099
cfa	-0.370447	6.86762	3.39494	0.103766	0.388099
yrhB	-0.451835	4.25525	5.04292	0.103827	0.388099
ymdE	1.70982	1.69493	4.00313	0.103895	0.388099
fadI	-0.47935	4.15257	4.28315	0.103898	0.388099
rplQ	-0.531909	12.1451	3.38583	0.104157	0.388723
gsiC	0.417422	5.8626	3.37243	0.104735	0.389973
yeaY	0.47767	7.44343	3.37086	0.104803	0.389973
insC-1	-0.861435	3.00886	3.37051	0.104818	0.389973
serS	-0.39314	9.26008	3.36952	0.104861	0.389973
ylcJ	1.43137	1.91897	5.07326	0.104982	0.390079
gspB	-0.521972	3.89045	5.81781	0.105091	0.390127
msrC	-0.426364	8.23679	3.36012	0.10527	0.390127
flhD	-0.685964	3.26992	8.1162	0.105272	0.390127
yjjP	-0.900409	3.93126	3.35755	0.105382	0.390191
ygiL	0.621097	3.49188	4.73977	0.105599	0.390514
kdgR	0.291344	7.13887	3.35061	0.105686	0.390514
paaY	0.347124	5.00526	4.63823	0.105787	0.390514
pepT	-0.734357	6.11177	3.3471	0.105839	0.390514
ygeO	0.634634	3.45094	6.04997	0.106165	0.391375
katG	-0.665428	7.76523	3.33695	0.106286	0.391478
yobH	0.383839	6.7491	3.32072	0.107006	0.393786
fucU	0.499301	4.67921	3.31788	0.107132	0.393907
yadK	0.949232	2.91552	3.31441	0.107287	0.394134
fliR	0.805934	3.15444	3.31161	0.107413	0.394251
nirC	-1.13719	3.3969	3.30761	0.107592	0.394449
rpoA	-0.524247	12.5668	3.30624	0.107654	0.394449
lptG	-0.299168	7.3877	3.30168	0.107858	0.394451
rho	-0.552168	10.0904	3.30098	0.10789	0.394451
gltD	-0.782195	7.17746	3.29723	0.108059	0.394451
yagK	0.819471	5.91728	3.29436	0.108188	0.394451
rcnR	0.61032	4.38619	3.2927	0.108264	0.394451
fepA	-0.312947	8.15733	3.29055	0.108361	0.394451
polB	0.344874	5.66646	3.28783	0.108484	0.394451
lysP	-0.403189	6.73779	3.2873	0.108508	0.394451
ydfU	1.22003	2.14256	11.6681	0.108543	0.394451
cysI	0.651324	8.79683	3.28423	0.108648	0.394451
fnr	0.624046	9.42558	3.28111	0.108789	0.394451
yciA	0.357966	7.47026	3.27666	0.108992	0.394451
yegR	0.991169	3.26422	3.27492	0.109072	0.394451
sufS	0.732503	5.17188	3.27457	0.109088	0.394451
ytjC	-0.286135	6.51253	3.27409	0.109109	0.394451
tcyJ	0.741568	8.80944	3.27322	0.109149	0.394451
mazG	0.27569	6.86262	3.26526	0.109514	0.39543
intB	0.504118	6.21557	3.25952	0.109778	0.396045
yeeE	0.484591	8.34845	3.25412	0.110027	0.396605
yfdX	1.01013	2.45328	4.26617	0.110286	0.397144
yfdK	0.744965	3.06344	3.57339	0.110365	0.397144
yafQ	0.417437	7.40074	3.24135	0.110619	0.397396
pal	-0.408326	11.6424	3.24125	0.110623	0.397396
wzzE	-0.350619	7.7125	3.23395	0.110964	0.398281
rpsC	-0.539045	12.2355	3.22618	0.111328	0.399247
pyrH	-0.421575	8.6215	3.22365	0.111446	0.399333
damX	-0.368476	8.72634	3.21858	0.111685	0.399572
yfdY	0.433698	5.35367	3.21732	0.111744	0.399572
pphB	0.577354	3.625	4.47788	0.111797	0.399572
yeeX	0.816735	10.4523	3.21305	0.111946	0.399765
astB	-0.407396	4.48808	4.50449	0.112137	0.400111
yedD	0.371035	7.85884	3.20629	0.112266	0.400231
pncB	-0.269349	6.62704	3.19834	0.112644	0.400883
glcC	-0.393919	6.79983	3.19682	0.112716	0.400883
rpsK	-0.519826	12.0794	3.1935	0.112875	0.400883
cspH	0.895475	5.96738	3.19293	0.112902	0.400883
yadN	0.993156	2.4703	3.90333	0.112924	0.400883
fucR	0.368991	5.24278	3.18599	0.113234	0.400927
pmrD	-0.530672	5.5873	3.18344	0.113356	0.400927
nrfC	-1.17025	2.9885	3.18302	0.113377	0.400927
arpB	0.887774	2.67894	3.38213	0.113408	0.400927
ynfM	-0.697248	6.31654	3.18231	0.113411	0.400927
surA	-0.333507	8.60276	3.17747	0.113644	0.401415
birA	0.320869	7.39439	3.17384	0.113819	0.401698
rhtB	-0.412728	5.07088	3.16176	0.114404	0.403426
ytfK	0.48996	8.0925	3.15605	0.114682	0.404069
glnH	-0.457288	8.76584	3.14915	0.11502	0.404639
ypfN	-0.294104	6.27189	3.14881	0.115036	0.404639
nei	-0.324364	5.7444	3.14647	0.115151	0.404701
rcdA	0.461302	4.46776	3.14455	0.115245	0.404701
nrdE	1.00866	5.50691	3.13739	0.115597	0.405074
rpmC	-0.488098	11.4215	3.13699	0.115617	0.405074
hsdS	-0.406482	6.47143	3.13654	0.11564	0.405074
yfcA	-0.321256	6.38375	3.13077	0.115925	0.405626
insC-2	-0.743819	3.14217	3.12946	0.115989	0.405626
ydaS	0.663516	3.28493	4.37926	0.116356	0.40657
murD	-0.370832	7.73062	3.11621	0.116648	0.407254
frwD	-0.719279	3.06178	10.2543	0.117029	0.408249
aceA	0.427844	4.32329	3.6159	0.11714	0.408296
lapA	-0.260178	6.88864	3.10335	0.117291	0.408487
yeiW	0.360906	4.82194	4.96172	0.117428	0.408501
yfeS	0.352724	5.80299	3.09943	0.117489	0.408501
yodB	0.683029	3.43144	3.09274	0.117826	0.409337
tldD	0.337662	7.83429	3.08893	0.118019	0.409671
ybgD	0.751963	3.8325	3.08589	0.118173	0.409685
lrp	-0.372226	8.04684	3.08501	0.118218	0.409685
hypA	-1.23297	2.84632	3.0756	0.118697	0.40996
uspF	-0.541917	5.37582	3.07404	0.118776	0.40996
dnaX_2	-0.336393	7.52683	3.07255	0.118853	0.40996
nikR	-0.40341	5.41115	3.07025	0.11897	0.40996
asd	-0.538326	8.6741	3.06928	0.11902	0.40996
uxaA	0.547143	3.71117	5.39932	0.119063	0.40996
gsiB	0.37633	6.3648	3.06756	0.119108	0.40996
yrbL	0.703142	7.45021	3.06608	0.119184	0.40996
waaH	0.40213	4.46717	3.53796	0.119198	0.40996
ampG	-0.375489	7.19583	3.06444	0.119268	0.40996
yiaB	0.892348	2.80037	3.05773	0.119613	0.410661
nrdI	1.01762	5.4914	3.05544	0.119732	0.410661
yehF	0.739865	3.02475	11.29	0.119764	0.410661
dksA	0.399492	9.96054	3.05157	0.119932	0.410903
ycjW	0.47688	4.03629	5.53033	0.120109	0.411077
yajO	-0.293732	6.05704	3.04683	0.120177	0.411077
rplB	-0.52254	12.3421	3.03965	0.120551	0.41202
cysA	0.469813	7.85232	3.03428	0.120831	0.412644
yeeA	0.363347	4.7089	4.2347	0.121233	0.413623
ecpR	1.21275	4.40504	3.02507	0.121314	0.413623
hyaA	-1.2355	5.62038	3.02263	0.121442	0.413726
creC	-0.36789	4.67586	4.5354	0.122143	0.415778
aaeA	0.528629	4.04614	3.00732	0.122251	0.415809
yjbD	-0.368138	6.35382	3.00118	0.122577	0.416107
hemH	0.38271	5.81896	2.99863	0.122713	0.416107
ftnA	0.266744	6.54963	2.99443	0.122937	0.416107
cyaY	0.311398	8.09248	2.99441	0.122938	0.416107
yfjF	0.30171	7.99762	2.99404	0.122958	0.416107
yagP	0.697695	5.36579	2.99186	0.123075	0.416107
rpoB	-0.415541	10.0013	2.99093	0.123124	0.416107
mnmA	-0.521863	7.92813	2.98975	0.123188	0.416107
nadA	0.583425	3.88582	2.98905	0.123225	0.416107
hdeD	-0.909075	8.56988	2.98105	0.123655	0.416771
ybcK	0.605159	3.46323	2.97954	0.123737	0.416771
sucB	-0.50463	10.2869	2.97807	0.123816	0.416771
argP	-0.462503	6.36528	2.97806	0.123817	0.416771
artM	-0.363154	6.40118	2.97386	0.124043	0.417201
arnT	-0.679875	3.62203	2.96662	0.124436	0.418187
ynjB	-0.478666	3.95678	4.41164	0.12467	0.418642
araJ	-0.330314	4.9815	3.22363	0.124791	0.418716
afuB	0.635638	3.32423	8.63771	0.125105	0.419434
yidA	-0.437089	7.22506	2.94991	0.125348	0.419916
ycdY	0.290861	7.79326	2.94563	0.125583	0.420122
ycfL	-0.386871	6.00417	2.94516	0.125609	0.420122
sad	-0.640875	5.24868	2.94126	0.125824	0.42048
metE	0.664087	4.07579	2.9396	0.125915	0.42048
ybaE	-0.57286	3.52019	4.83529	0.126082	0.420627
ybdK	-0.431364	4.159	2.9513	0.126302	0.420627
trpS	0.321292	8.95295	2.9321	0.12633	0.420627
yadC	0.715866	4.14525	2.9316	0.126357	0.420627
nfo	0.302537	6.02735	2.92788	0.126564	0.420983
yqeK	1.05423	2.29114	3.29631	0.127179	0.422695
mazE	0.327473	7.10817	2.91326	0.12738	0.423028
cysJ	0.531005	8.96169	2.9083	0.127658	0.423537
potB	-0.432567	7.13556	2.90696	0.127733	0.423537
tsx	-0.550009	9.62475	2.9041	0.127895	0.423739
yidE	-0.38222	4.6808	2.89479	0.12842	0.424728
ydjE	0.660402	3.27583	2.89425	0.128451	0.424728
ahpF	0.291473	8.08422	2.89162	0.1286	0.424728
ymjE	-0.552206	3.84039	2.89102	0.128634	0.424728
ascG	-0.317268	5.20032	2.88992	0.128696	0.424728
rppH	-0.270327	8.26964	2.88685	0.128871	0.424893
mltA	0.263714	7.2495	2.8855	0.128948	0.424893
mlaE	-0.272846	7.45377	2.87496	0.12955	0.426425
rclR	0.680223	4.43314	2.87159	0.129743	0.426425
rpsS	-0.475727	11.3104	2.87077	0.12979	0.426425
infA	-0.428597	11.7118	2.87031	0.129817	0.426425
hprR	0.393753	5.57016	2.86238	0.130273	0.427593
ftsP	-0.298186	7.01225	2.85292	0.130821	0.429056
ispB	-0.299116	8.28095	2.8468	0.131177	0.42957
yjhR	0.717408	3.32325	2.84672	0.131181	0.42957
kdsA	0.41293	8.64635	2.84355	0.131366	0.429661
yebZ	-0.309341	6.2771	2.84229	0.13144	0.429661
relA	-0.256106	7.35382	2.84033	0.131554	0.429661
yggN	0.298205	7.08117	2.83495	0.13187	0.429661
cobT	0.334783	5.51984	2.83487	0.131874	0.429661
folE	-0.547701	8.81577	2.83481	0.131878	0.429661
yihO	0.818863	2.76407	2.83406	0.131921	0.429661
yadE	-0.301578	5.25898	2.83196	0.132045	0.429732
yjiG	-1.07894	3.96239	2.82919	0.132208	0.429929
ytfJ	0.34502	5.06754	2.82394	0.132518	0.430606
yqjE	0.369817	8.14587	2.81768	0.132887	0.431475
fkpB	-0.323789	8.0137	2.8133	0.133147	0.431987
fimF	-0.320008	8.77543	2.80824	0.133448	0.432631
ribB	0.868675	9.25007	2.80583	0.133592	0.432765
essQ	1.30801	2.66339	2.80353	0.13373	0.432879
fabA	0.371866	10.4262	2.80047	0.133913	0.433138
ygeG	1.327	1.90204	8.34226	0.13429	0.434025
flxA	0.69567	3.07186	6.69244	0.134743	0.434253
nemA	0.482592	5.91925	2.78475	0.134858	0.434253
rcsB	0.271375	8.759	2.78231	0.135006	0.434253
pepA	0.249631	7.49269	2.78122	0.135072	0.434253
dcp	0.266333	5.87786	2.78053	0.135113	0.434253
cas3	0.652904	3.2189	7.19692	0.135141	0.434253
ybeT	1.11945	2.15048	3.16198	0.135147	0.434253
symE	0.365682	4.99892	2.77938	0.135183	0.434253
wbbJ	-0.425079	8.08089	2.77638	0.135366	0.434508
insI-1	-0.516381	5.83995	2.77087	0.135701	0.43492
zraS	-0.490671	3.83524	3.89972	0.135961	0.43492
opgB	-0.303551	6.43607	2.76349	0.136151	0.43492
nuoJ	-0.484216	9.03553	2.76296	0.136184	0.43492
rpsM	-0.467914	12.1149	2.76181	0.136254	0.43492
qseG	-0.267175	5.51413	2.75982	0.136376	0.43492
hcxA	0.419505	4.79001	2.75824	0.136473	0.43492
arnA	-0.708882	5.22785	2.75798	0.136489	0.43492
rseC	-0.39029	6.48676	2.75683	0.13656	0.43492
ftnB	-0.360687	4.84531	2.75665	0.136571	0.43492
yqiI	0.635293	4.0121	2.75408	0.136728	0.43492
insC-4	-0.799201	3.08462	2.75405	0.13673	0.43492
yaeF	-0.433715	4.21506	5.74467	0.137446	0.436866
mntS	0.697342	7.79742	2.73845	0.137695	0.43733
pdeI	0.494666	6.16243	2.73325	0.138019	0.438029
ycgX	0.636538	5.12641	2.72612	0.138464	0.439111
nuoN	-0.454401	8.70582	2.72275	0.138675	0.439451
exuR	0.400578	7.30732	2.71391	0.139231	0.439965
ydfW	0.942322	2.42785	2.80834	0.139291	0.439965
argC	-0.541927	3.55931	5.0538	0.139317	0.439965
frsA	0.269975	7.61333	2.71105	0.139412	0.439965
yaeH	0.399533	6.97585	2.70773	0.139621	0.439965
rimP	-0.449854	9.54929	2.70663	0.139691	0.439965
yfaZ	-0.345082	5.60437	2.70649	0.1397	0.439965
csdA	0.236942	6.66555	2.70537	0.139771	0.439965
aegA	-0.943647	3.64285	2.70484	0.139805	0.439965
yeaE	-0.411177	4.31567	5.25174	0.13988	0.439965
ybcI	-0.366249	4.6611	3.22056	0.140156	0.440506
essD	-0.60563	4.64108	2.68472	0.141088	0.442655
ynbE	0.386401	4.50993	5.05558	0.141138	0.442655
casC	0.568835	3.46845	3.7833	0.141155	0.442655
yaiA	0.267649	7.65288	2.67404	0.141775	0.443479
tufA	-0.492599	13.1456	2.67235	0.141884	0.443479
dapB	-0.340515	7.35631	2.67204	0.141904	0.443479
ydbJ	-0.288243	7.11607	2.67157	0.141935	0.443479
yjbB	-0.365585	4.5228	3.83543	0.141965	0.443479
murE	-0.25815	7.87808	2.66952	0.142067	0.443479
rsxB	0.375243	6.0426	2.66668	0.142252	0.443479
ybcN	1.02293	2.26835	2.86316	0.142258	0.443479
yfjJ	0.725472	2.92351	2.86522	0.142426	0.443501
ybhL	-0.249893	6.95999	2.65839	0.142791	0.443501
nanM	0.593293	3.99817	2.65827	0.142799	0.443501
inaA	0.27027	6.52576	2.65777	0.142831	0.443501
pyrC	-0.482043	7.54531	2.65706	0.142878	0.443501
yhjE	-0.609037	3.25904	3.28662	0.142985	0.443501
yqhD	0.416013	5.41845	2.65518	0.143001	0.443501
potA	-0.420046	7.62445	2.65062	0.143299	0.443767
fepC	-0.384484	6.43806	2.64942	0.143377	0.443767
csrA	0.300291	10.9882	2.64905	0.143402	0.443767
puuP	-0.371123	4.50211	4.49253	0.143927	0.445067
ypfH	0.37429	6.3699	2.63581	0.144274	0.445812
yqhA	-0.263459	7.46751	2.63015	0.144649	0.446215
modB	-0.356632	4.65078	2.94445	0.14465	0.446215
yecT	0.637587	4.04146	2.62905	0.144721	0.446215
afuC	0.578283	3.40631	3.61052	0.144895	0.446424
pgaD	0.512897	3.68487	3.17286	0.145086	0.446686
mgsA	0.311308	8.11313	2.61703	0.145522	0.44749
plsY	-0.269864	5.41478	2.61494	0.145662	0.44749
alx	-0.35461	4.68952	4.19251	0.145665	0.44749
murF	-0.297799	7.65782	2.60969	0.146014	0.448237
ybiB	0.40535	6.64598	2.60789	0.146135	0.448281
sseB	0.485014	7.72425	2.60607	0.146257	0.448332
yejM	-0.402215	6.93918	2.60431	0.146376	0.44837
yhhY	-0.707798	5.22794	2.59479	0.14702	0.450015
insB-3	-0.311779	4.92655	2.66184	0.147132	0.450032
ydfJ	0.967225	2.34529	6.28566	0.147384	0.450477
btuE	0.366957	6.47098	2.58354	0.147785	0.451136
tdcC	-0.703252	2.93891	12.7068	0.147835	0.451136
ybcQ	0.937992	2.3988	7.40811	0.147921	0.451136
pabA	0.355221	6.1453	2.57862	0.148121	0.451422
basS	-0.521213	6.02158	2.56676	0.148936	0.453411
bglG	0.781079	2.74061	3.35857	0.148989	0.453411
yqhC	0.441489	4.07396	5.01344	0.149182	0.453672
cmoA	-0.40086	6.46436	2.55704	0.149609	0.454643
yjbI	0.71919	2.90617	2.80512	0.150115	0.455233
kdsC	0.251896	7.6648	2.54973	0.150117	0.455233
ycgH	0.550384	4.19863	2.54959	0.150127	0.455233
intR	0.693241	2.98754	7.5159	0.150663	0.456531
wcaE	0.878069	3.3711	2.53527	0.15113	0.457299
nadK	-0.332531	5.88241	2.53523	0.151133	0.457299
mobA	-0.354583	5.04088	2.52939	0.151544	0.457769
rplE	-0.489655	12.2878	2.52899	0.151572	0.457769
rnr	0.29609	7.4784	2.52841	0.151614	0.457769
yfgD	0.352311	8.75935	2.52325	0.151978	0.458541
evgS	-0.287311	5.39726	2.51665	0.152447	0.45934
mdtF	-0.728151	6.43779	2.51647	0.15246	0.45934
ydeQ	1.24254	1.92079	4.93757	0.152661	0.459615
cysZ	0.36814	6.22128	2.51138	0.152823	0.459775
macB	0.372238	4.80815	2.50795	0.153068	0.460184
php	0.649793	3.10575	4.03641	0.153194	0.460235
ythA	0.751394	2.8062	3.52431	0.153522	0.460892
cadC	0.520779	3.60176	3.49542	0.153692	0.460892
rplK	-0.457626	11.5377	2.49809	0.153776	0.460892
asnA	-0.890847	8.23444	2.49707	0.153849	0.460892
insC-3	-0.775179	3.13627	2.49351	0.154106	0.461334
yihL	-0.37741	4.4927	3.33482	0.154674	0.462708
yigI	0.24694	7.88903	2.47633	0.155353	0.463796
ebgC	1.10073	2.09283	7.24391	0.155371	0.463796
dbpA	0.41259	5.37669	2.47462	0.155478	0.463796
envR	0.721272	2.86729	3.00356	0.155478	0.463796
queC	0.308887	6.98028	2.47093	0.155748	0.464274
hofC	0.432116	4.06189	3.39101	0.155892	0.464375
tktA	-0.503372	9.14005	2.46712	0.156027	0.464449
galM	-0.274153	7.81722	2.46265	0.156356	0.464788
asnB	-0.538888	6.64374	2.46258	0.156361	0.464788
yjbL	1.25839	1.88686	3.69946	0.15682	0.465382
proS	-0.333896	9.23173	2.45609	0.156839	0.465382
lysA	-0.455775	4.18663	2.4549	0.156928	0.465382
nrfD	-0.71616	3.0013	2.4539	0.157002	0.465382
ybeX	-0.311036	8.00144	2.4483	0.157417	0.466285
nuoF	-0.391233	9.06823	2.44477	0.157679	0.466735
ptsH	-0.495333	9.91545	2.4397	0.158057	0.467525
yfbK	0.68077	2.98479	3.52029	0.158448	0.468179
yfjD	0.229131	6.43048	2.43363	0.158512	0.468179
mlaC	-0.362586	8.23073	2.43106	0.158704	0.468179
yafT	0.687518	4.80072	2.42913	0.158849	0.468179
yqiA	-0.287674	7.02546	2.42714	0.158999	0.468179
alpA	0.843846	2.54125	3.53562	0.159089	0.468179
fumA	-0.362832	7.34573	2.42579	0.159101	0.468179
nsrR	0.475634	8.1594	2.42458	0.159192	0.468179
sixA	0.422615	7.87246	2.42225	0.159368	0.468179
metF	0.500811	4.2466	2.41884	0.159626	0.468179
ygaQ	0.941447	2.33758	5.98682	0.159656	0.468179
yhbT	-0.50441	7.5718	2.4129	0.160076	0.468179
vsr	0.331785	5.21741	2.41287	0.160079	0.468179
ygiQ	-0.381064	6.59504	2.41215	0.160133	0.468179
yjcE	-0.383727	5.7967	2.40961	0.160326	0.468179
yegS	0.377852	5.80125	2.40908	0.160366	0.468179
truC	-0.410726	5.30629	2.40826	0.160429	0.468179
xapR	0.492716	4.59226	2.40784	0.160461	0.468179
rsxG	-0.356656	5.18423	2.40611	0.160593	0.468179
glf	0.340819	9.11544	2.40277	0.160849	0.468179
truD	0.260088	7.76988	2.40208	0.160901	0.468179
ydaW	0.657633	3.05011	6.16315	0.160934	0.468179
kgtP	-0.386308	9.63271	2.40161	0.160937	0.468179
rpsH	-0.45926	12.2193	2.40157	0.16094	0.468179
mokB	0.319933	5.84819	2.39638	0.161338	0.469013
rpsI	-0.413002	12.5321	2.39466	0.16147	0.469074
yadS	0.345904	5.95783	2.39089	0.161761	0.469595
pheP	-0.320166	6.44379	2.38743	0.162027	0.469727
nusA	-0.373497	9.47591	2.38724	0.162042	0.469727
slp	-0.706337	7.5642	2.3843	0.162269	0.469727
hsrA	-0.356454	4.73405	2.38408	0.162286	0.469727
parC	0.237365	7.04418	2.3831	0.162362	0.469727
caiF	0.464404	5.01101	2.38048	0.162565	0.469992
sdiA	0.379331	5.7548	2.37751	0.162796	0.470147
ldtD	-0.298105	5.44983	2.37692	0.162842	0.470147
yheS	-0.264843	6.70079	2.37352	0.163106	0.47059
uidC	1.18461	1.94913	5.7342	0.163241	0.470655
nagA	-0.231344	6.39185	2.36935	0.163431	0.470695
hflX	0.234509	8.6053	2.36876	0.163477	0.470695
kdgK	0.272223	5.91485	2.36721	0.163599	0.470724
ynfQ	0.760408	2.85893	2.35852	0.164281	0.471699
hybF	-0.4217	4.02809	3.42999	0.16429	0.471699
ldcC	-0.295008	5.14376	2.35787	0.164332	0.471699
cobS	0.313892	5.05109	2.35719	0.164385	0.471699
kbaY	0.897659	2.39894	3.80834	0.164552	0.471858
ftp	-0.270054	5.32824	2.35342	0.164682	0.471911
rpmF	-0.3713	12.2712	2.34565	0.165297	0.473351
yjjU	-0.384332	6.42256	2.3408	0.165683	0.474133
amiB	0.242969	6.73297	2.33806	0.165901	0.474437
yhcH	0.360378	4.4462	3.73625	0.166349	0.475396
mutY	-0.337362	6.64111	2.3279	0.166714	0.476115
potG	-0.40363	4.07715	2.49384	0.166867	0.47623
tfaX	1.42367	1.69002	7.4564	0.167811	0.478601
yqeH	0.70717	3.1303	2.30803	0.168318	0.479608
acrR	0.372841	6.07822	2.30714	0.168391	0.479608
cspI	0.888674	4.86885	2.30507	0.16856	0.479742
selB	-0.234343	6.61374	2.30377	0.168665	0.479742
eamB	-0.387866	4.20444	2.88012	0.168959	0.480252
livK	0.509265	3.59607	3.64736	0.169323	0.480964
ileS	-0.266603	8.65747	2.29001	0.169792	0.481678
hcaT	0.317028	5.36009	2.28988	0.169803	0.481678
aroA	0.362436	7.48619	2.28702	0.170038	0.482022
bax	0.306843	7.48039	2.27943	0.170665	0.483474
ppx	0.270537	6.89411	2.27533	0.171005	0.484113
iscS	0.557889	9.92041	2.27247	0.171243	0.48439
modF	-0.335271	4.95879	2.27118	0.171351	0.48439
trmD	-0.389462	11.3608	2.27002	0.171447	0.48439
yjfI	0.781335	2.62846	3.73668	0.171669	0.484524
yidD	-0.536945	8.96228	2.26595	0.171787	0.484524
gltL	-0.293226	6.73824	2.26239	0.172084	0.484524
ybfA	0.605997	6.96929	2.26169	0.172143	0.484524
aroB	-0.320947	8.88717	2.26033	0.172257	0.484524
yieP	-0.359235	7.35399	2.25919	0.172353	0.484524
rclB	0.608831	4.31174	2.25774	0.172475	0.484524
lplT	-0.281766	5.3535	2.25736	0.172507	0.484524
solA	-0.296458	5.72235	2.2571	0.172528	0.484524
yrdA	0.337396	7.62775	2.25559	0.172655	0.48456
ydiE	0.322938	6.16744	2.25208	0.172951	0.484804
yeeS	-0.363574	5.78468	2.25121	0.173025	0.484804
yfbN	0.739471	2.7313	2.99095	0.173087	0.484804
ydfV	0.471155	3.71478	2.46299	0.1734	0.485104
nadB	0.439103	3.90915	2.24648	0.173424	0.485104
murR	-0.618704	3.06234	3.07141	0.173605	0.485289
pxpA	-0.240857	5.99381	2.24039	0.173941	0.485646
pxpC	-0.276869	6.52701	2.24013	0.173963	0.485646
cspG	-0.768762	10.5163	2.23818	0.174129	0.485788
yddA	0.392771	4.25182	2.23358	0.17452	0.485986
amn	-0.332449	5.57536	2.23338	0.174537	0.485986
ypdB	0.275058	5.42768	2.23238	0.174623	0.485986
yeeN	0.339599	9.09433	2.23194	0.17466	0.485986
atpF	-0.448193	10.9819	2.22633	0.175141	0.487003
yqjA	0.266239	7.16511	2.21549	0.176074	0.489276
mntR	0.266623	7.70365	2.20962	0.176582	0.489604
map	-0.286933	9.24839	2.20825	0.176701	0.489604
yceA	0.45115	7.24083	2.20795	0.176727	0.489604
nrdF	0.985985	5.32778	2.20606	0.176892	0.489604
ihfB	-0.288612	9.63787	2.20604	0.176893	0.489604
hisC	-0.500528	4.82992	2.20491	0.176992	0.489604
yejG	0.293157	9.5032	2.20476	0.177004	0.489604
pyrI	0.288051	6.59455	2.20145	0.177293	0.49008
cysM	0.40044	7.76082	2.19633	0.17774	0.490994
aslB	0.659645	2.93991	3.66532	0.178278	0.49216
pinR	0.753007	4.5381	2.1783	0.179327	0.494566
tsaC	-0.303865	7.39617	2.17766	0.179384	0.494566
dinJ	0.297281	8.70602	2.17497	0.179623	0.4949
leuS	-0.326221	8.76315	2.17249	0.179843	0.495184
yaiS	0.822731	2.49124	3.60745	0.180299	0.496106
ompL	0.8707	2.38331	2.98794	0.180413	0.496106
alaE	0.414891	6.91457	2.16136	0.180837	0.496947
rayT	0.300435	5.50353	2.15986	0.180971	0.496993
sspB	-0.282092	8.77281	2.15713	0.181216	0.49719
hdeA	-0.758396	11.3686	2.15644	0.181278	0.49719
ddlA	-0.243936	8.02119	2.15038	0.181824	0.498362
ycfH	-0.316456	7.11615	2.14341	0.182454	0.499606
fldA	0.265676	9.06701	2.14274	0.182514	0.499606
talA	0.344578	6.09456	2.13874	0.182878	0.499932
trpC	0.429189	5.10423	2.13818	0.182929	0.499932
srlR	-0.39543	4.56367	2.13729	0.18301	0.499932
ilvY	0.336448	4.75544	2.13623	0.183107	0.499932
dinG	0.258438	6.08029	2.13159	0.18353	0.500762
hemF	0.256308	5.53102	2.12501	0.184133	0.502082
tusD	-0.28525	7.32451	2.12247	0.184366	0.502394
yibF	0.302928	6.26644	2.12022	0.184573	0.502634
sfmA	0.896993	2.57819	2.11567	0.184992	0.503452
yjcF	1.09703	1.98132	8.49018	0.185317	0.503988
frmR	0.333742	6.14047	2.11097	0.185428	0.503988
dgcT	0.631186	4.80732	2.10787	0.185715	0.504443
waaA	0.276238	6.74417	2.10482	0.185999	0.504889
glgB	-0.261299	6.61121	2.1018	0.18628	0.505044
adhE	-0.753028	9.24603	2.10081	0.186373	0.505044
cspC	0.419989	4.71778	2.10002	0.186447	0.505044
exoX	-0.371115	5.31161	2.09907	0.186535	0.505044
deaD	-0.375882	9.48708	2.09656	0.18677	0.505356
prkB	-0.231919	5.76674	2.09121	0.187272	0.506389
hipA	0.516763	3.45723	6.00256	0.187887	0.50754
patD	0.417823	3.96714	4.38104	0.187938	0.50754
insA-4	-0.5635	3.9535	2.08223	0.188118	0.507696
chaA	-0.428845	6.13503	2.08098	0.188236	0.507696
mzrA	-0.289731	6.82438	2.07936	0.18839	0.507787
yeeR	-0.308716	6.3783	2.07365	0.188931	0.508921
intQ	0.91396	2.26066	5.39841	0.189131	0.509134
ybeU	0.669508	2.85177	2.45162	0.189345	0.50933
selD	0.254534	7.71928	2.0668	0.189584	0.50933
yieF	0.332466	6.90902	2.06588	0.189672	0.50933
qmcA	-0.282169	5.09572	2.06439	0.189814	0.50933
nrdH	0.913892	5.36367	2.06364	0.189886	0.50933
adk	-0.32607	9.3969	2.06321	0.189928	0.50933
fsr	-0.379202	4.10465	2.26439	0.190438	0.510374
rpsP	-0.357763	10.9479	2.05477	0.190739	0.510855
yihR	0.860632	2.35785	3.39298	0.190968	0.511146
emrA	0.31754	6.17669	2.05002	0.191196	0.511398
yehA	0.806333	2.51603	2.0489	0.191305	0.511398
dld	-0.251935	6.26472	2.0416	0.192012	0.512965
cysS	0.379473	8.09479	2.03834	0.19233	0.513489
mqo	-0.342535	8.1701	2.03649	0.192511	0.513646
prmB	0.292165	7.26458	2.03259	0.192892	0.514337
yneK	0.977931	2.12766	4.92684	0.193685	0.515811
accD	0.251327	9.48286	2.02446	0.193689	0.515811
arnC	-0.733646	4.75056	2.01633	0.194491	0.51762
rob	-0.261949	8.44008	2.01205	0.194915	0.518423
asnC	-0.326068	4.46008	2.55239	0.195576	0.519854
rfe	-0.235085	7.8362	1.99614	0.196503	0.521987
crr	0.36021	10.6462	1.98713	0.197409	0.524066
torY	0.62597	2.95122	2.22219	0.197705	0.524521
yqjC	0.263061	7.83588	1.97629	0.198507	0.525776
ynfC	0.351093	4.62143	1.97541	0.198597	0.525776
bfr	0.279831	8.24706	1.97386	0.198755	0.525776
glgS	0.277281	7.05997	1.97369	0.198772	0.525776
dmsD	0.233994	5.59928	1.97341	0.198801	0.525776
cysW	0.299405	7.39167	1.96776	0.199378	0.526973
panZ	-0.274357	5.89673	1.9622	0.199948	0.527722
htrE	0.788879	2.47973	2.80273	0.200014	0.527722
insB-2	-0.28217	4.91305	2.22004	0.200037	0.527722
yoaE	0.526454	5.69962	1.95917	0.20026	0.527787
yciO	0.24299	6.09781	1.95867	0.200311	0.527787
ampD	-0.314969	5.69448	1.95344	0.200851	0.528878
tsaB	0.421973	7.64001	1.95063	0.201142	0.529041
acrB	-0.230679	8.07298	1.94917	0.201293	0.529041
ydcJ	-0.490724	3.475	7.36569	0.201498	0.529041
insC-6	-0.67527	3.19669	1.94715	0.201503	0.529041
rpoD	0.283431	8.92041	1.9468	0.201539	0.529041
ydhQ	0.287077	6.62452	1.94341	0.201891	0.529635
fhuB	-0.332148	7.22247	1.93702	0.202559	0.531056
ymgM	-0.250031	5.23613	1.93326	0.202953	0.531759
fadM	0.38235	4.52909	1.92933	0.203365	0.532508
yhdU	0.59237	3.93919	1.92363	0.203966	0.533752
aceB	0.376842	4.15319	2.19338	0.20447	0.534552
yehK	1.36399	1.62759	2.95555	0.204525	0.534552
yfjH	0.397185	4.52295	1.91694	0.204674	0.534609
ynfH	0.431713	3.79919	6.42441	0.204843	0.53472
mmuP	0.478645	3.52288	3.44281	0.205551	0.536074
truA	-0.258358	6.96043	1.90809	0.205616	0.536074
pgaB	0.761516	2.52321	4.58083	0.205869	0.536126
rpsN	-0.400447	12.0012	1.90553	0.20589	0.536126
yfjI	0.637134	2.88684	6.03358	0.20633	0.536811
trxB	0.277213	9.20313	1.9007	0.206407	0.536811
kefF	-0.307398	4.70598	1.89826	0.20667	0.53697
nuoG	-0.378079	9.30836	1.89777	0.206723	0.53697
hdeB	-0.685451	10.8623	1.89366	0.207165	0.537675
nemR	0.320156	4.57135	3.29003	0.207313	0.537675
ghoT	-0.702784	3.64439	1.8917	0.207376	0.537675
ubiB	0.270156	7.17137	1.88682	0.207905	0.538189
ygiA	-0.225373	5.58662	1.88649	0.20794	0.538189
yehW	-0.251441	5.34765	1.94789	0.208049	0.538189
yigE	0.336257	4.31223	1.98507	0.208201	0.538189
ybjL	-0.229585	6.23789	1.88399	0.208212	0.538189
cnoX	0.43162	7.74925	1.88276	0.208345	0.538204
intS	0.370499	4.50751	1.8735	0.209356	0.540337
suhB	-0.522838	8.88446	1.87285	0.209427	0.540337
rnk	-0.275737	7.10094	1.87148	0.209577	0.540395
yaeI	-0.353683	4.22216	2.87756	0.20981	0.540664
lysO	-0.276509	5.21107	1.86206	0.210613	0.542213
rsmJ	0.250294	6.47898	1.86156	0.210668	0.542213
rspB	0.666028	2.76364	2.93453	0.21093	0.542556
waaF	-0.245563	7.85928	1.8569	0.211183	0.542877
yjjB	-0.734866	2.53026	4.37433	0.211407	0.543121
dcm	0.292978	6.13496	1.84359	0.212666	0.545997
bioD	0.421064	7.85083	1.84252	0.212785	0.545997
fbaB	0.219815	6.11089	1.83761	0.213335	0.547076
rplC	-0.387221	12.7742	1.83393	0.21375	0.54762
fklB	-0.267207	8.85855	1.83259	0.213901	0.54762
pck	-0.352453	8.37203	1.83227	0.213936	0.54762
yegD	0.332721	4.97619	1.82807	0.214411	0.548502
ybhM	0.463166	3.55387	2.61035	0.214828	0.549237
kdsB	-0.291034	7.75535	1.82298	0.214988	0.549313
ypjB	0.823377	2.37616	1.82054	0.215265	0.549689
ybaA	0.528861	4.56963	1.81724	0.215642	0.550082
yahE	0.738877	2.53462	2.27204	0.215781	0.550082
focB	0.349649	4.21472	2.35142	0.21581	0.550082
chbC	0.61005	2.92843	6.7796	0.216031	0.550311
torS	-0.466028	3.48466	3.16708	0.216358	0.550812
ygfF	-0.441989	5.934	1.80902	0.216582	0.551049
yejO	0.345894	4.26874	3.20325	0.216834	0.55136
hlyE	0.64563	2.7958	2.28902	0.217027	0.551518
pntA	0.349913	6.08633	1.80384	0.217177	0.551568
speG	-0.268305	5.4722	1.80189	0.217401	0.551805
nirD	-0.937828	4.03802	1.79946	0.217683	0.552187
malZ	-0.28099	4.77601	2.93187	0.218466	0.553842
hcp	-0.841749	2.24213	4.069	0.218699	0.554098
cydX	0.190405	7.20849	1.78523	0.219335	0.554579
atpB	-0.367018	10.2919	1.78303	0.219592	0.554579
envC	-0.19356	7.15149	1.78292	0.219605	0.554579
rep	0.283904	6.64236	1.78189	0.219725	0.554579
ydfR	0.629235	2.83493	1.79402	0.21979	0.554579
yiiF	0.43691	3.65062	1.84461	0.219842	0.554579
ilvL	-1.30334	3.50366	1.77933	0.220025	0.554579
mltF	0.337976	4.86166	1.77905	0.220058	0.554579
fdnI	0.500039	3.39329	2.46416	0.220071	0.554579
yidF	-0.457038	5.17686	1.77735	0.220257	0.554717
nimR	0.335306	4.32352	1.81305	0.220694	0.555486
agp	-0.308186	4.63461	3.04346	0.220924	0.555734
galP	-0.510887	5.8586	1.76833	0.22132	0.556397
gpsA	-0.345046	8.25356	1.76469	0.221751	0.5569
thrS	0.228263	9.42685	1.76442	0.221784	0.5569
gcvH	0.447711	9.99493	1.76236	0.222028	0.557181
pyrL	0.512762	3.29102	3.70095	0.222381	0.557737
ydhF	0.295282	5.64377	1.75825	0.222516	0.557744
fdhF	-0.385316	4.7099	1.74895	0.223628	0.559862
ydcS	-0.570084	3.01944	5.18738	0.22375	0.559862
tig	-0.258212	10.5097	1.74664	0.223905	0.559862
yfiF	0.266461	8.36885	1.74559	0.224032	0.559862
kup	-0.215246	5.98178	1.74506	0.224095	0.559862
yejF	0.261739	6.00862	1.74389	0.224236	0.559862
clpX	0.243863	9.08226	1.74344	0.22429	0.559862
gspC	0.536297	3.20618	1.73477	0.225338	0.561957
elaB	-0.297139	8.51414	1.7343	0.225395	0.561957
nuoH	-0.358809	8.97107	1.73175	0.225705	0.5622
yahN	0.478448	3.68256	1.7313	0.225759	0.5622
yadV	0.736811	2.49305	1.89319	0.22647	0.563637
rhsB	0.445233	3.5773	3.57196	0.227282	0.56521
yfgH	0.503188	3.90079	1.7181	0.227371	0.56521
fdhD	0.241972	6.62339	1.71702	0.227503	0.56521
bcr	-0.241333	6.73923	1.71355	0.22793	0.565937
gcvR	-0.432289	6.83476	1.71214	0.228105	0.566038
lipA	-0.259582	8.71202	1.70932	0.228453	0.566298
sufE	0.573202	4.74268	1.70829	0.22858	0.566298
gyrB	0.311658	8.83798	1.70803	0.228612	0.566298
atpD	-0.405591	10.8725	1.70514	0.228969	0.566567
ydeE	-0.481767	3.77108	1.70433	0.22907	0.566567
fau	-0.235598	6.49703	1.7039	0.229123	0.566567
yifK	-0.266189	7.2069	1.70154	0.229417	0.566601
yccA	-0.345134	8.40659	1.70018	0.229585	0.566601
tauC	0.719031	2.53238	4.14178	0.229607	0.566601
dapD	-0.278587	9.37689	1.69947	0.229674	0.566601
bamC	0.210262	8.867	1.69718	0.229959	0.566973
yciU	0.196296	7.59607	1.69587	0.230123	0.567046
speA	-0.240494	8.21477	1.69054	0.230789	0.567862
hyaB	-0.878936	5.1958	1.69016	0.230837	0.567862
yeeL	0.81112	2.29864	2.78882	0.230858	0.567862
sfsB	0.238277	6.48561	1.6846	0.231536	0.569198
yfeO	-0.282437	4.67241	2.26825	0.231822	0.569521
insA-2	-0.327156	5.16667	1.68141	0.231937	0.569521
mgrB	-0.321177	6.98928	1.67904	0.232237	0.569728
ycbZ	-0.272077	7.1371	1.67861	0.232291	0.569728
yfaY	-0.287749	5.65172	1.67484	0.232768	0.570566
mrcB	-0.217671	7.31463	1.6733	0.232964	0.570668
hisJ	-0.261023	7.42636	1.67239	0.23308	0.570668
malF	-0.619339	2.78898	10.1528	0.233217	0.570673
ycbF	-0.354439	4.40441	1.66708	0.233756	0.571659
elfD	0.768607	2.38703	7.38409	0.234201	0.572416
ygaM	0.2181	7.59317	1.65971	0.234698	0.5733
murI	0.261923	7.99035	1.65852	0.234851	0.573341
lldD	0.308172	5.9114	1.65679	0.235074	0.573553
casB	0.505469	3.23047	2.74221	0.235891	0.575213
lolD	0.247247	6.81861	1.64804	0.236203	0.575643
rpsG	-0.346042	11.9472	1.64191	0.236999	0.577249
pgk	-0.535128	10.504	1.63811	0.237494	0.57772
dnaE	-0.262196	7.79583	1.6378	0.237534	0.57772
ykgA	-0.358892	5.27695	1.63727	0.237603	0.57772
mtlA	-0.211506	5.43411	1.86149	0.237848	0.577983
menF	-0.217472	6.35903	1.63071	0.238462	0.579066
fimG	-0.226963	8.07772	1.6299	0.238568	0.579066
rmuC	0.218742	5.41664	1.79413	0.23925	0.5801
elbB	0.458539	3.46566	6.18263	0.239269	0.5801
mltC	-0.292744	6.07707	1.61746	0.24021	0.582047
msbA	-0.341852	7.32583	1.61274	0.240837	0.582462
yhfZ	-0.310449	4.59597	1.65464	0.240839	0.582462
yagG	0.55332	3.01715	4.05525	0.24086	0.582462
bcsA	0.383527	3.85564	3.78111	0.241493	0.582462
ybiT	-0.205567	7.20151	1.60775	0.241501	0.582462
adeP	-0.337859	9.16139	1.60758	0.241525	0.582462
kbl	0.322381	8.87962	1.60666	0.241647	0.582462
ralR	1.14072	1.73766	4.31925	0.24182	0.582462
ybeM	-0.321601	4.28414	1.94078	0.241974	0.582462
gntK	0.41042	3.67064	2.96491	0.242004	0.582462
pinQ	0.481303	4.15756	1.60394	0.242011	0.582462
yjiT	-0.32512	5.45914	1.60288	0.242153	0.582462
dicC	1.22316	1.64889	4.76354	0.242175	0.582462
purF	0.347859	9.7917	1.59912	0.242658	0.583292
dicA	0.230467	7.62862	1.59697	0.242947	0.583449
deoB	-0.219498	7.46343	1.59658	0.243	0.583449
waaQ	0.199627	7.08738	1.59522	0.243183	0.583557
ydfT	0.421595	3.62592	4.366	0.243393	0.583729
atpH	-0.372084	10.7797	1.59259	0.243538	0.583744
yhgH	-0.211023	5.77657	1.59063	0.243803	0.584048
insC-5	-0.689876	3.07193	1.58854	0.244087	0.584396
pstC	0.235269	6.05939	1.58148	0.245046	0.586053
rnt	-0.361597	5.54764	1.58118	0.245087	0.586053
bdcR	0.348736	5.04949	1.58039	0.245195	0.586053
ybfB	0.705054	2.50164	2.99819	0.245336	0.586058
pyrG	-0.28188	9.0509	1.57751	0.245588	0.586328
rsmE	-0.235972	6.02857	1.57315	0.246186	0.587422
yajR	-0.33465	6.37697	1.57174	0.24638	0.587553
smpB	-0.236511	8.00025	1.56988	0.246635	0.587794
dctR	-0.60516	6.30878	1.5689	0.24677	0.587794
dgkA	0.178007	6.42845	1.56796	0.246899	0.587794
yaiZ	-0.272559	7.21299	1.56696	0.247038	0.587794
betI	0.317711	7.55196	1.56181	0.247748	0.588873
rhsE	0.650249	2.65062	5.53032	0.24777	0.588873
ybbO	-0.207173	6.01936	1.55829	0.248238	0.58956
yneJ	0.37881	3.93077	2.42929	0.248339	0.58956
ompX	-0.280422	13.3432	1.5531	0.248959	0.5907
ybfL	0.818377	2.21173	1.71015	0.249223	0.590724
ispF	0.237682	7.46332	1.54889	0.249547	0.590724
fimB	-0.486701	6.39841	1.54884	0.249555	0.590724
macA	0.255756	4.9148	1.56271	0.249621	0.590724
rplS	-0.304024	12.148	1.54768	0.249716	0.590724
ybcO	1.21518	1.63565	3.31108	0.249809	0.590724
ptsP	-0.196454	7.31436	1.54306	0.250364	0.591707
glnP	-0.316807	7.58754	1.53907	0.250926	0.592702
lpxH	-0.187391	6.52398	1.53435	0.251593	0.593944
yhcE	0.333803	4.18997	2.47797	0.251768	0.594026
yfbV	0.20386	6.2526	1.53123	0.252034	0.594078
ydhL	0.349018	4.09885	1.99741	0.252071	0.594078
efeO	0.216669	8.12907	1.51897	0.253783	0.597778
yceH	0.265794	5.82282	1.51361	0.254553	0.599256
yafX	-0.194342	5.95673	1.51057	0.25499	0.599952
yiiD	0.191497	6.91837	1.50607	0.255641	0.601002
livF	0.433617	3.5201	6.07297	0.255721	0.601002
yafK	0.258844	9.44411	1.50109	0.256362	0.602039
yhgF	-0.294757	7.09699	1.50051	0.256448	0.602039
fkpA	0.209726	9.46622	1.49753	0.256881	0.60253
yhfA	0.229744	7.45077	1.49707	0.256948	0.60253
moeA	-0.224487	6.42443	1.49381	0.257425	0.60253
malX	-0.485412	3.23709	4.33199	0.257448	0.60253
pykA	-0.221641	6.81717	1.49334	0.257493	0.60253
cspF	0.405572	6.10773	1.4932	0.257513	0.60253
sohB	0.252981	7.53116	1.49119	0.257808	0.602857
folX	0.196423	7.71881	1.48869	0.258174	0.602857
sfmH	0.794083	2.2276	1.49028	0.258295	0.602857
alaC	-0.331236	6.02326	1.48751	0.258347	0.602857
yafC	0.322226	4.23674	1.48738	0.258367	0.602857
yadM	0.543241	2.96524	2.10822	0.258975	0.603942
recJ	-0.197994	7.199	1.48216	0.259135	0.603981
ftsW	-0.218345	7.48203	1.47802	0.259747	0.605072
narX	-0.378514	5.23743	1.46953	0.261008	0.607676
cyoE	-0.280472	10.7997	1.46789	0.261253	0.60791
paaJ	-0.335779	4.19056	2.37398	0.261517	0.608189
ybhF	0.245256	4.99816	2.15439	0.261751	0.608399
ydcZ	0.318928	5.49914	1.4581	0.262721	0.610005
yoaG	0.705244	2.42641	2.11697	0.262731	0.610005
rpmD	-0.371581	10.8139	1.45446	0.26327	0.610523
zapD	-0.236955	7.51731	1.45422	0.263306	0.610523
ygfS	0.508215	3.09763	3.19218	0.263388	0.610523
thpR	-0.220624	5.4498	1.44664	0.264455	0.612531
yfcS	1.03129	1.80395	6.78731	0.264545	0.612531
yrbG	0.189828	6.38689	1.44367	0.264906	0.613032
bcsF	-0.244164	4.86444	1.44241	0.265098	0.613121
dut	-0.2919	7.61592	1.44119	0.265283	0.613121
rluA	0.242337	7.38639	1.44005	0.265458	0.613121
iscR	0.490803	9.11229	1.4396	0.265526	0.613121
uspG	0.261294	7.50354	1.43863	0.265674	0.613128
yjjQ	0.669385	2.66929	1.43738	0.265867	0.613237
yeeO	-0.425387	3.45026	2.35918	0.266534	0.614439
ybaB	-0.302639	9.73576	1.43205	0.266683	0.614449
ybeL	0.223555	6.83555	1.42824	0.26727	0.615465
glrK	0.234158	5.07381	1.6476	0.267653	0.61601
feaB	0.334752	4.06088	2.60602	0.267981	0.616428
yddL	1.27963	1.53115	5.89999	0.268126	0.616428
metG	-0.24176	8.00178	1.41871	0.268747	0.617158
ydcI	-0.196944	7.39247	1.41767	0.268909	0.617158
yhcA	0.626548	2.62673	1.58819	0.269058	0.617158
def	0.252127	9.25586	1.4166	0.269075	0.617158
srlD	0.493059	3.13232	2.38578	0.269273	0.617158
yghA	0.295182	4.43826	1.85273	0.269321	0.617158
sfmC	0.704593	3.39503	1.41119	0.26992	0.61816
panE	-0.178132	6.26538	1.41035	0.270051	0.61816
perR	0.230094	5.0448	1.70709	0.270469	0.618522
hsdM	-0.250257	7.02156	1.40702	0.270573	0.618522
yjhZ	0.523399	3.23289	1.40539	0.270829	0.618522
purN	0.402464	9.46553	1.40404	0.271042	0.618522
cdh	0.213718	5.60127	1.40334	0.271151	0.618522
gapC	0.225499	8.25463	1.40306	0.271196	0.618522
ariR	0.319154	6.36929	1.40167	0.271415	0.618522
recG	-0.26216	6.56454	1.40096	0.271526	0.618522
malI	0.34279	3.95932	2.10504	0.271673	0.618522
recF	-0.295286	6.94793	1.39923	0.271799	0.618522
yeiB	-0.265239	6.37596	1.39909	0.271821	0.618522
yhdY	-0.822057	2.08414	5.25093	0.272068	0.618659
wcaD	0.578059	2.8356	1.39686	0.272175	0.618659
rplN	-0.313724	12.8204	1.39502	0.272465	0.618986
yhdX	-0.523332	2.95611	2.93561	0.272708	0.619203
dgcE	-0.309676	4.18754	2.83725	0.272959	0.619441
mepH	-0.219525	5.64838	1.38666	0.273796	0.620734
nudC	0.193112	6.50156	1.38563	0.27396	0.620734
yneO	0.422959	3.47833	4.18721	0.27397	0.620734
yncD	0.289756	5.12184	1.38294	0.274391	0.621355
insA-3	-0.231443	5.17802	1.37826	0.275142	0.622554
rclC	-0.40324	4.79856	1.37735	0.275289	0.622554
yehE	0.285834	4.41788	1.8656	0.275363	0.622554
metR	0.293351	5.4978	1.36872	0.276683	0.625202
rtcB	0.390513	3.66982	3.74434	0.27715	0.625892
ygeR	-0.180347	6.60384	1.36501	0.277284	0.625892
grxD	0.209564	9.68682	1.3594	0.278199	0.627547
rsd	0.356144	7.49911	1.35869	0.278315	0.627547
yphH	0.336397	4.00084	1.98236	0.278545	0.627584
ybgI	-0.296439	6.92484	1.35501	0.278918	0.627584
marB	0.240544	5.62473	1.35501	0.278918	0.627584
frmB	0.245138	6.03326	1.35486	0.278943	0.627584
yahH	0.496127	3.0728	3.32354	0.279075	0.627584
ydaU	0.620717	2.60818	5.4008	0.27963	0.628497
cbpM	-0.296112	6.16304	1.34532	0.280514	0.630119
dgcN	-0.251677	4.8932	1.96007	0.28065	0.630119
yehS	0.249303	7.48428	1.34244	0.280991	0.63034
zitB	-0.285178	4.31477	1.39492	0.281047	0.63034
rpsU	-0.364188	11.9786	1.34099	0.281231	0.630416
yfiE	-0.336451	3.92651	2.2294	0.281412	0.630489
yafJ	-0.175958	8.03033	1.33818	0.281698	0.630677
tamA	-0.211051	5.76072	1.3376	0.281795	0.630677
cas1	0.353622	3.84624	2.36074	0.282023	0.630853
ves	0.436913	3.37897	4.02304	0.282876	0.632231
arnD	-0.489589	4.69186	1.3307	0.282948	0.632231
ccmB	-0.33894	3.88645	2.05156	0.283142	0.632231
cbpA	-0.279174	5.91524	1.32896	0.283238	0.632231
yqgF	-0.171911	6.38212	1.32744	0.283494	0.632278
ydgA	-0.203434	7.34276	1.32705	0.283559	0.632278
ldrD	-0.382098	3.66712	2.83608	0.283744	0.632356
btuF	-0.27624	6.13666	1.32268	0.284294	0.633247
zupT	-0.264167	6.31933	1.32104	0.28457	0.633392
flhC	-0.333265	4.06796	2.66503	0.284659	0.633392
rhtA	-0.300752	4.2603	1.72094	0.285234	0.634337
ybbA	-0.232191	4.93282	1.36412	0.285402	0.634376
yneG	0.199314	5.99019	1.31459	0.285663	0.634383
kdpA	-0.657561	4.73132	1.31363	0.285827	0.634383
hrpA	0.216587	6.13868	1.31346	0.285856	0.634383
torD	-0.410004	3.48485	4.14323	0.286044	0.634468
argO	0.228432	5.0707	1.63589	0.286211	0.634505
hicA	0.480629	3.11164	2.78727	0.286849	0.635392
ycjD	0.350576	3.81513	2.09875	0.287002	0.635392
kefG	-0.25268	6.17499	1.30637	0.287064	0.635392
kch	-0.232762	4.79405	1.30549	0.287213	0.635392
yieE	-0.284298	4.7756	1.30321	0.287605	0.635689
cpsB	0.671499	3.28218	1.30216	0.287785	0.635689
yfcQ	0.694754	2.35329	2.47567	0.28791	0.635689
ygiN	0.193698	8.83043	1.3012	0.28795	0.635689
flk	0.238675	5.98235	1.29877	0.288367	0.635739
ykgJ	0.358307	4.91297	1.29843	0.288426	0.635739
yiaW	0.804048	2.09761	2.44271	0.288459	0.635739
galK	-0.229834	6.63056	1.29682	0.288704	0.635739
atpA	-0.356907	11.25	1.29669	0.288726	0.635739
erpA	0.252022	9.7037	1.29195	0.289545	0.636876
yfbU	0.274269	7.32647	1.29129	0.289659	0.636876
yfbO	0.481717	3.19716	1.29108	0.289695	0.636876
gyrA	0.230288	8.89918	1.28915	0.290031	0.637282
racR	0.254562	7.90868	1.28794	0.29024	0.637411
hyaF	-0.640309	5.30278	1.28644	0.290501	0.637652
ydbD	0.650678	2.46794	4.85229	0.290734	0.637831
yaeP	0.276982	7.61367	1.28226	0.291229	0.638587
cpsG	0.620844	3.2464	1.27999	0.291627	0.639127
malQ	-0.224335	4.94543	1.42657	0.291899	0.639318
secG	-0.262456	10.7177	1.27689	0.292169	0.639318
yhbS	-0.352438	7.56763	1.27649	0.292239	0.639318
sucC	-0.340612	10.4406	1.27525	0.292458	0.639318
lspA	-0.199606	7.75626	1.27517	0.292472	0.639318
rraA	0.225836	9.3312	1.27429	0.292626	0.639325
qorA	0.231552	5.43157	1.27062	0.293273	0.640338
ybcH	0.316566	4.0345	1.55295	0.293393	0.640338
holE	0.20164	6.34289	1.26665	0.293974	0.641273
ribE	-0.256108	8.36727	1.2642	0.294409	0.641724
emrK	0.641037	2.48081	3.95792	0.294656	0.641724
agaR	0.258578	6.75646	1.26186	0.294824	0.641724
yecE	-0.221438	4.87152	1.31472	0.294924	0.641724
allE	0.327297	4.62064	1.2612	0.294941	0.641724
yhcF	0.280216	4.64648	1.26029	0.295103	0.641746
dnaX_1	-1.13131	2.87189	1.25927	0.295284	0.64181
yjhE	0.491461	3.09433	1.25742	0.295614	0.642197
alaS	-0.192072	9.00474	1.25654	0.295773	0.64221
gatB	0.979329	1.77525	1.69365	0.296241	0.642897
yjfL	0.578377	2.66762	1.65353	0.296768	0.64371
tesB	-0.220016	6.22427	1.24556	0.297743	0.644966
tilS	-0.169386	6.17662	1.24533	0.297785	0.644966
yhiM	-0.434615	4.30319	1.24521	0.297806	0.644966
bdm	-0.391321	4.34213	1.24072	0.298617	0.646377
yebB	0.450565	3.1918	2.04497	0.298764	0.646377
yafD	-0.274607	7.0033	1.23756	0.29919	0.646842
ydaV	0.722496	2.24248	5.87364	0.299381	0.646842
pth	0.262769	6.62169	1.23592	0.299489	0.646842
yajQ	0.254505	9.95294	1.23488	0.299678	0.646842
ygcO	-0.665512	2.35455	4.57659	0.299783	0.646842
bcsB	0.328835	3.97282	1.33054	0.299898	0.646842
ppnP	-0.218851	8.59193	1.22467	0.301545	0.650034
glgP	-0.248147	6.81454	1.22391	0.301686	0.650034
clcB	-0.371145	3.59528	3.05909	0.301888	0.650137
mpl	0.211479	8.32655	1.22032	0.302347	0.65061
aspC	-0.267729	8.6854	1.21965	0.30247	0.65061
yfjT	-0.403057	3.40098	2.67798	0.302574	0.65061
yahJ	0.20061	5.37062	1.35772	0.302945	0.65061
clsB	-0.35981	3.67771	3.46897	0.303071	0.65061
lpxL	-0.288157	4.97149	1.21541	0.303253	0.65061
clsA	-0.223515	5.69263	1.21537	0.303262	0.65061
tolA	-0.193928	8.0583	1.21486	0.303355	0.65061
ispG	-0.19645	8.05921	1.21389	0.303537	0.65061
yfiR	-0.209991	6.33369	1.21328	0.303649	0.65061
dedD	0.199657	7.53512	1.21214	0.303862	0.650736
yhhL	-0.179407	5.63607	1.29435	0.304161	0.651046
mraZ	-0.228045	8.39526	1.20693	0.304831	0.651836
csgD	-0.469795	4.46704	1.20606	0.304994	0.651836
ycaN	0.438257	3.24913	1.50818	0.305117	0.651836
cynR	0.229323	4.88877	1.8937	0.305413	0.651836
yheV	0.343062	6.2704	1.20372	0.305431	0.651836
clsC	-0.270643	4.36641	2.23218	0.305456	0.651836
sseA	-0.260696	6.03645	1.19586	0.306908	0.654603
wbbH	0.259055	8.14753	1.19258	0.307528	0.655595
uidR	0.200331	6.29006	1.19018	0.307983	0.655846
matP	0.241421	5.30867	1.1887	0.308262	0.655846
mtgA	-0.372397	3.55681	1.82158	0.308418	0.655846
yhaH	-0.213135	7.01356	1.18766	0.30846	0.655846
bfd	0.277871	8.32637	1.18746	0.308498	0.655846
artI	-0.19352	6.99503	1.18704	0.308579	0.655846
xynR	0.22053	6.66274	1.18249	0.309445	0.657357
fucO	-0.496603	2.90996	4.65101	0.31005	0.658311
prfC	-0.298873	8.5145	1.17819	0.310267	0.65844
gmhB	0.158158	7.21118	1.17418	0.311037	0.659113
gmm	0.636958	3.784	1.1737	0.311129	0.659113
accA	-0.234713	9.28799	1.17367	0.311136	0.659113
ydfE	0.873466	1.89275	5.24438	0.311224	0.659113
rssB	-0.256871	6.02184	1.17248	0.311365	0.659113
pldB	0.154779	7.0227	1.17077	0.311694	0.65948
abpA	-0.258402	5.05327	1.1678	0.312269	0.660365
pdxJ	0.195381	6.93581	1.16626	0.312566	0.660661
uxaB	0.510693	2.85767	3.04541	0.312806	0.660726
ydiY	-0.486057	8.40769	1.16259	0.313279	0.660726
[truncated: 2,222 more rows]

## Sheet: W3110_0_vs_W3110_1_putrescine
genes	logFC	logCPM	F	PValue	FDR
yhiD	-2.41082	6.66242	234.189	2.13122e-06	0.00891704
mdtF	-2.00826	5.98592	169.403	6.01438e-06	0.0125821
dctR	-2.50319	5.731	147.74	9.29386e-06	0.0129618
mdtE	-2.31373	5.45478	126.737	1.50954e-05	0.0145045
appA	-1.92872	5.90377	121.295	1.73333e-05	0.0145045
appB	-2.1793	6.53686	102.378	2.94901e-05	0.0178485
hdeB	-2.02609	10.3749	97.6264	3.41984e-05	0.0178485
ycaD	-0.982415	6.8779	95.5024	3.66206e-05	0.0178485
appC	-2.30693	6.81452	92.0323	4.10812e-05	0.0178485
ompF	1.00921	9.98183	88.582	4.62453e-05	0.0178485
gadC	-2.21622	4.91179	87.1023	4.87191e-05	0.0178485
ytjA	-1.20156	7.8495	85.6212	5.13709e-05	0.0178485
hdeD	-2.09413	8.15467	83.5241	5.54566e-05	0.0178485
hdeA	-2.03949	10.9059	77.3628	7.01978e-05	0.0209791
creD	1.13431	4.91961	62.4627	0.000134632	0.0375534
yjbJ	-1.12943	8.18629	56.7066	0.000180037	0.0470796
osmY	-1.05744	8.60794	53.0355	0.000219832	0.0541045
adiC	-1.76646	3.65534	46.7118	0.000319928	0.0702679
poxB	-0.832058	4.87308	46.6711	0.000320748	0.0702679
otsB	-1.02581	4.74814	45.3766	0.000348312	0.0702679
cbrB	0.613286	6.63762	44.7305	0.000363231	0.0702679
yhdV	-1.05988	5.57699	43.7146	0.000388416	0.0702679
efeO	-0.722796	7.59539	43.5305	0.00039322	0.0702679
hyaE	-1.77056	4.81794	42.5965	0.000418832	0.0702679
ydiY	-0.925248	8.13452	41.9375	0.000438222	0.0702679
ymdF	-0.949308	4.89345	41.4971	0.00045184	0.0702679
ecnB	-0.843972	6.3382	41.4461	0.00045345	0.0702679
ahr	-0.811187	5.20708	40.4962	0.000484899	0.0709301
gadB	-2.13499	5.5659	40.3033	0.000491628	0.0709301
ytfK	-0.61416	7.44901	38.797	0.000548621	0.0743534
ybjG	-0.806723	7.00777	38.7411	0.000550898	0.0743534
lldP	-0.892556	6.21432	36.6607	0.000645165	0.0843554
iap	-0.694368	5.43881	34.8631	0.000744258	0.0943628
slp	-2.15552	7.07076	33.4459	0.000836795	0.101273
appY	-1.28471	6.63296	32.894	0.000876876	0.101273
hyaF	-1.75332	4.8884	32.8575	0.000879614	0.101273
yegS	-0.868746	5.14831	32.3818	0.000916347	0.101273
yjjV	-0.715415	5.85998	32.3385	0.000919788	0.101273
ygiV	-0.656709	5.22507	38.1491	0.00097958	0.103723
hyaD	-1.53139	5.24102	31.3536	0.00100285	0.103723
yobH	-0.59192	6.18052	31.1348	0.00102262	0.103723
arnC	-2.23804	4.28532	30.8499	0.00104913	0.103723
tcyJ	0.64075	8.63876	30.6735	0.00106599	0.103723
gadE	-2.27571	7.07449	29.9921	0.00113456	0.105763
msyB	-0.572796	6.20729	29.964	0.00113751	0.105763
lldR	-1.31947	5.4716	29.4879	0.00118903	0.10815
efeB	-0.629854	7.16692	28.3677	0.00132286	0.117038
cbrC	0.54507	5.98286	28.2142	0.0013427	0.117038
asr	-2.65235	5.2505	27.7788	0.00140114	0.11964
arnB	-1.91368	4.60221	27.2847	0.00147153	0.121953
basR	-0.924044	6.01301	27.0428	0.00150768	0.121953
efeU	-0.823077	7.26333	26.9904	0.00151567	0.121953
ais	-2.22639	4.77399	25.7655	0.00171908	0.132345
cbrA	0.73138	4.79189	25.6803	0.00177046	0.132345
basS	-0.978881	5.75285	25.4811	0.00177135	0.132345
yeaQ	-0.572916	8.81752	25.4811	0.00177135	0.132345
gadA	-2.3007	5.53296	25.2953	0.00180661	0.132611
yqjC	-0.467478	7.37945	24.7012	0.00192569	0.138915
talA	-0.607833	5.54912	24.3626	0.00199817	0.141701
yiaG	-0.711079	7.35435	24.0988	0.00205711	0.141858
ybaT	-1.32329	4.2699	23.8927	0.00210476	0.141858
ybaY	-0.75051	7.69444	23.753	0.00213786	0.141858
glsA	-1.86974	4.69086	23.5783	0.00218025	0.141858
yhcO	-0.780751	5.20656	23.5112	0.00219681	0.141858
hslJ	-0.585667	7.82424	23.2762	0.00225614	0.141858
arnA	-1.59964	4.86585	23.214	0.00227221	0.141858
otsA	-0.701225	4.83907	30.4441	0.00232741	0.141858
yagU	-1.25469	7.69895	23.0036	0.00232764	0.141858
yceK	-0.554938	6.67756	22.9596	0.00233943	0.141858
eptA	-2.36828	4.6926	22.3671	0.00250639	0.147943
yjjU	-0.883065	6.13185	22.2446	0.00254286	0.147943
lldD	-1.20222	5.18529	22.2346	0.00254587	0.147943
hyaC	-1.86686	4.60059	22.0165	0.00261257	0.149626
yahK	-0.682693	6.11014	21.8289	0.00267181	0.149626
rzoD	1.55909	3.74874	21.7968	0.00268211	0.149626
aidB	-1.05877	4.55927	21.6787	0.00272048	0.149769
yodD	-0.866968	4.64332	21.1976	0.00288445	0.156734
yciW	0.643843	6.00739	20.7936	0.00303223	0.162652
ybaL	0.498595	6.41261	20.2421	0.00325034	0.171778
rstB	-0.597268	6.01697	20.0752	0.00332039	0.171778
arnD	-1.56285	4.26761	20.0631	0.00332553	0.171778
yhbO	-0.957009	4.48614	19.8683	0.00340993	0.172919
ybgA	-0.716216	5.06836	19.8223	0.00343027	0.172919
yhiM	-1.23803	3.96443	19.5193	0.0035683	0.177735
sbp	1.45091	7.26587	19.2765	0.00368416	0.18091
ygaC	-0.81357	5.95224	19.1706	0.00373625	0.18091
rzpD	0.537563	5.82413	19.1195	0.00376175	0.18091
ygaM	-0.619397	7.10135	18.876	0.0038863	0.184776
pgpC	-0.626246	6.2067	18.6511	0.00400618	0.188335
bdm	-1.14378	4.00321	18.5255	0.00407522	0.189452
cadA	-2.09971	3.96911	18.4122	0.00413882	0.190295
borD	0.694739	8.84378	17.6923	0.00457501	0.208063
arnE	-1.18702	3.3485	34.3821	0.00495869	0.223088
hdhA	-0.596009	5.26428	16.8173	0.0051897	0.229444
ybhP	-0.961143	4.05092	16.7912	0.00520965	0.229444
ybjX	-0.463648	8.07005	16.5963	0.00536181	0.233685
ybgS	-0.805166	4.82435	16.4016	0.00551965	0.238085
amyA	-0.605489	4.96945	36.9527	0.00562759	0.238674
tktB	-0.665923	5.69254	16.2493	0.00564741	0.238674
yoeB	0.455417	7.15281	15.7091	0.00613291	0.254488
ackA	0.442406	8.75386	15.6982	0.00614325	0.254488
ygiM	-0.405135	6.58463	15.4849	0.00635046	0.260493
cadB	-3.20121	3.66557	15.3913	0.00644418	0.261771
ygdI	-1.05719	6.23981	15.0526	0.00679916	0.269968
hyaB	-1.81987	4.85805	15.039	0.0068139	0.269968
yebE	0.578144	5.82787	15.0036	0.00685262	0.269968
raiA	0.949303	10.8178	14.9294	0.00693454	0.269968
arnT	-1.29336	3.36836	14.8989	0.00696859	0.269968
pspA	0.693336	6.55496	14.8022	0.00707814	0.271697
yccJ	-0.659785	7.95176	14.642	0.00726442	0.276312
gltS	0.437455	5.77458	15.125	0.00738983	0.276535
hisJ	0.442803	7.68011	14.4917	0.00744511	0.276535
cysB	0.867944	7.06097	14.4726	0.00746857	0.276535
galP	-0.772324	5.65959	14.1049	0.00793804	0.290417
yggE	-0.562159	7.56074	14.0717	0.0079823	0.290417
spy	-0.615899	5.35197	13.7776	0.00838902	0.302583
gadW	-0.762697	6.96019	13.7093	0.00848732	0.303512
htpX	0.408174	7.75038	13.4841	0.00882225	0.312816
betT	0.580538	6.25771	13.4249	0.00891314	0.313261
fadB	0.745956	4.77076	13.379	0.00898454	0.313261
ygiW	-0.712525	7.73032	13.0507	0.00951716	0.329089
gmd	-1.09244	3.65503	12.6813	0.010167	0.343253
mgrB	-0.381208	6.85926	12.6674	0.0101927	0.343253
yjdP	-0.862932	5.49932	12.6459	0.0102324	0.343253
iraM	-0.387223	7.22826	12.6337	0.0102549	0.343253
rstA	-0.612179	7.09156	12.558	0.0103969	0.345244
copA_1	-0.583986	5.9418	12.1677	0.0111706	0.365757
yahO	-0.686939	7.2676	12.1586	0.0111895	0.365757
yhjX	-3.11336	5.56195	11.7235	0.0121457	0.393935
fbaB	-0.541291	5.65804	11.6255	0.0123758	0.39831
betB	0.395861	6.62228	11.3768	0.0129855	0.412209
cfa	-0.551888	6.68964	11.3692	0.0130047	0.412209
tadA	-0.36965	6.19759	11.2197	0.0133912	0.419794
yrbL	0.882085	7.45556	11.1962	0.0134533	0.419794
yjdI	-0.801488	4.48357	11.1617	0.013545	0.419794
yeaC	0.337526	9.00703	11.0968	0.01372	0.420207
osmF	-0.679036	4.34421	21.6456	0.0137592	0.420207
katE	-0.633082	4.52036	15.0525	0.0139612	0.420421
blc	-0.50653	5.10921	14.0524	0.0139671	0.420421
cysP	0.804834	8.18465	10.9292	0.014186	0.423959
sra	-0.446728	6.9035	10.8894	0.0142997	0.424131
nmpC	0.549623	7.94911	10.8392	0.0144448	0.424131
yfeK	-0.716572	4.21202	11.3217	0.0145543	0.424131
fcl	-0.969225	3.4606	10.845	0.0145972	0.424131
ftnA	0.448583	6.54302	10.4899	0.0155095	0.44753
cpxR	0.292498	7.98036	10.4434	0.0156591	0.44875
loiP	-0.368285	7.10539	10.172	0.0165698	0.471621
yefM	0.317995	7.18346	10.0982	0.0168295	0.474395
maeA	-0.289646	7.42237	10.0266	0.0170865	0.474395
fumD	0.338711	6.78677	10.0238	0.0170967	0.474395
yajI	-0.709848	5.44954	10.0172	0.0171209	0.474395
fadI	0.602293	4.56705	10.4218	0.0173044	0.47551
pagP	-0.865795	4.48765	9.94433	0.0173884	0.47551
aldA	0.520374	7.25848	9.8938	0.0175772	0.477551
ycaC	-0.79627	5.09195	9.71028	0.0182859	0.490535
gcd	-0.520905	7.74024	9.70937	0.0182895	0.490535
sstT	0.434784	7.18499	9.59098	0.0187669	0.500132
yddB	0.624028	4.46179	12.0201	0.0190023	0.503201
osmB	-0.884343	8.49316	9.46349	0.0192994	0.507852
yaeR	-0.357289	6.2791	9.41552	0.0195048	0.510052
yghA	-0.766758	3.90354	21.9248	0.0197725	0.5125
ugd	-0.477342	5.17672	14.721	0.0198434	0.5125
yaiY	-0.667207	5.56256	9.22277	0.0203601	0.522617
ygiB	0.341188	7.95419	9.11126	0.0208775	0.53263
rseB	-0.280493	7.52686	8.98101	0.0215038	0.545284
ydiZ	-0.538225	4.7681	16.9566	0.0217899	0.54921
ycaO	0.453835	7.22241	8.89008	0.0219558	0.550079
ompC	-0.334965	12.9157	8.76567	0.0225946	0.55711
yciY	-0.400846	7.48013	8.76303	0.0226085	0.55711
dps	-0.581197	8.28111	8.75779	0.0226359	0.55711
glnK	-0.898952	7.76457	8.66566	0.023126	0.565843
cbpM	-0.745838	5.88499	8.62446	0.0233497	0.566385
wza	-1.20464	2.87705	8.61181	0.0234189	0.566385
yeaH	-0.70352	4.21539	8.58094	0.023589	0.567222
skp	-0.309409	9.99689	8.37979	0.0247383	0.591457
fic	-0.470418	5.32308	8.3287	0.0250418	0.595313
eptC	-0.302716	6.87305	8.27863	0.0253441	0.599094
ribC	0.257818	7.34351	8.21429	0.0257396	0.605026
glpF	0.505302	7.53145	8.15821	0.026091	0.606688
puuC	0.57155	5.71707	8.15674	0.0261003	0.606688
adiA	-0.639159	4.21954	30.579	0.0270046	0.623294
clsB	-0.888237	3.42119	27.5641	0.0271127	0.623294
puuR	0.613705	7.36535	7.97791	0.0272643	0.623355
pqqL	0.703987	4.95909	7.84651	0.0281636	0.640415
kch	-0.545867	4.57659	8.67614	0.0284952	0.641181
yiaD	-0.443456	7.33445	7.79823	0.0285038	0.641181
avtA	0.279572	7.87454	7.76171	0.0287647	0.64359
ybfA	0.360923	6.72054	7.65074	0.0295771	0.658248
yqjE	-0.397001	7.65865	7.57395	0.030157	0.667325
adiY	-1.18199	2.76071	29.2005	0.030304	0.667325
ybgC	-0.392986	7.80555	7.50647	0.0306791	0.672048
yoaB	0.242565	7.17151	7.42571	0.0313196	0.678502
dtpB	-0.429945	5.16181	7.98037	0.0314064	0.678502
betA	0.336373	5.89523	9.75986	0.0314602	0.678502
yjjZ	0.55601	7.79481	7.37143	0.03176	0.680993
yoaE	0.710558	5.69429	7.35425	0.0319012	0.680993
btuB	0.254791	7.41642	7.33101	0.0320934	0.681618
ogrK	0.647908	5.23524	7.30362	0.0323218	0.683003
astD	-0.553218	4.49149	9.51343	0.0325711	0.684811
yqjK	-0.456027	7.29212	7.16614	0.0335016	0.700853
ftp	-0.43338	5.15995	8.58454	0.0337266	0.702051
yniD	-1.60332	2.17678	17.769	0.0342889	0.708528
cbpA	-0.747239	5.63119	7.06825	0.0343765	0.708528
gabT	-0.73504	3.7525	32.4217	0.0353895	0.723757
yfcE	-0.272705	6.88252	6.95132	0.0354613	0.723757
ygiC	0.366947	7.48607	6.88571	0.03609	0.731709
copA_2	-1.51519	4.03178	6.84019	0.0365347	0.731709
cdgI	0.933253	3.54407	6.82972	0.036638	0.731709
pspC	0.562413	4.39982	14.7633	0.0367078	0.731709
yebV	-0.488382	6.6388	6.81519	0.0367821	0.731709
puuD	0.756494	7.55115	6.80333	0.0369002	0.731709
wcaI	-1.07785	2.8501	12.3904	0.0381936	0.751061
yccA	0.462916	8.70878	6.67268	0.0382352	0.751061
dnaX_1	-5.84699	2.46558	8.2111	0.0388066	0.753577
ymjE	0.924203	4.45693	6.61095	0.0388881	0.753577
msrB	0.265411	8.71417	6.6095	0.0389036	0.753577
puuB	0.500769	5.24654	6.54221	0.0396326	0.764161
hyaA	-1.60446	5.43671	6.51992	0.0398781	0.764919
kbp	-0.33225	6.8623	6.48946	0.0402167	0.764919
gdx	-0.265829	6.6305	6.48913	0.0402204	0.764919
asnA	1.74219	9.62279	6.4512	0.0406476	0.767719
ldtC	0.845408	5.68757	6.4239	0.0409587	0.767719
betI	0.447167	7.51793	6.41252	0.0410894	0.767719
pepA	0.303641	7.4146	6.41146	0.0411016	0.767719
mscK	-0.240546	6.71425	6.44014	0.041474	0.771233
emrD	-0.380527	5.35713	12.253	0.0420999	0.776517
yfcD	-0.227142	7.02472	6.31331	0.0422519	0.776517
potD	0.377695	8.33057	6.30803	0.042315	0.776517
topA	0.2731	7.46763	6.2447	0.0430813	0.787127
ybdK	-0.689828	3.98188	6.19575	0.0436863	0.792708
rcnB	-0.312013	6.85988	6.1894	0.0437657	0.792708
yddA	0.586402	4.25276	6.16244	0.0441044	0.792873
yehY	-0.725238	3.67217	32.0446	0.0442782	0.792873
yodC	-0.392346	5.26718	10.0474	0.0443433	0.792873
mlc	0.42711	5.3552	6.11667	0.0446876	0.79443
elaB	-0.589876	8.28312	6.10716	0.0448101	0.79443
ydeI	-0.77679	3.49707	19.4499	0.0451034	0.796255
pdhR	0.333215	7.99113	6.04523	0.0456185	0.801966
puuA	0.80848	6.96769	6.02764	0.0458516	0.80269
lysP	-0.525355	6.58143	6.01321	0.046044	0.802701
yjbE	-0.846482	5.08319	5.97898	0.0465047	0.805816
ydjA	0.328754	7.59981	5.97138	0.0466079	0.805816
puuP	0.457075	4.79692	7.44494	0.0468096	0.805972
cysJ	0.416337	8.78749	5.94099	0.0470234	0.806335
dnaJ	0.350321	7.83923	5.91883	0.0473293	0.808269
ivy	-0.822924	8.28049	5.84696	0.0483401	0.821949
yoaL	0.782697	4.88017	5.83415	0.0485233	0.821949
yphA	-0.571582	4.19912	10.5292	0.0495335	0.825893
lysU	-0.39292	8.9644	5.75447	0.0496833	0.825893
ugpB	-0.458105	4.7714	5.76094	0.0497475	0.825893
slyB	-0.2946	10.109	5.74014	0.0498959	0.825893
corA	0.257397	6.46815	5.73883	0.0499154	0.825893
kefF	-0.50149	4.53376	12.6666	0.0510251	0.825893
rcsA	-0.532341	5.17397	5.66399	0.0510457	0.825893
ydcH	0.512392	6.08136	5.64711	0.0513054	0.825893
ysaB	-0.722433	4.47299	5.63804	0.0514456	0.825893
yieF	-0.254903	6.50837	5.63364	0.0515139	0.825893
astB	-0.537372	4.3462	24.3136	0.0516324	0.825893
epd	0.215886	7.88976	5.612	0.051851	0.825893
gltP	0.41424	7.03055	5.60233	0.0520026	0.825893
ycfJ	-0.553483	6.90771	5.59738	0.0520805	0.825893
yfeO	-0.503972	4.49068	19.6155	0.0523889	0.825893
ycgX	-0.576512	4.4483	5.5754	0.0524281	0.825893
sgrT	-0.678013	3.75061	5.81223	0.0524391	0.825893
bioF	0.235977	7.74408	5.55909	0.0526879	0.825893
yqjD	-0.395004	7.37582	5.54543	0.052907	0.825893
ybiJ	-0.288181	6.00327	8.19269	0.0530385	0.825893
rlmD	-0.230235	6.63763	5.96317	0.0530414	0.825893
bioB	0.334508	8.26379	5.53352	0.0530988	0.825893
yncJ	0.713708	4.53768	5.48741	0.0538505	0.834484
glgA	-0.348546	6.45487	5.44325	0.0545838	0.842726
gss	-0.214365	7.18577	5.42999	0.0548066	0.843054
rpoE	-0.271112	8.05683	5.37927	0.0556698	0.853196
rssB	-0.333132	5.88733	5.35678	0.0560583	0.854093
ygaZ	0.326327	7.5123	5.35228	0.0561366	0.854093
yeaG	-0.605825	5.74083	5.28649	0.0572962	0.863569
cysU	0.553481	7.12539	5.28526	0.0573182	0.863569
yafQ	0.309943	7.2322	5.28188	0.0573786	0.863569
fdhD	-0.252962	6.27568	5.8868	0.05815	0.865703
cecR	0.758556	5.01639	5.23615	0.0582052	0.865703
artQ	-0.325654	6.41639	5.232	0.058281	0.865703
ftnB	0.412968	5.11821	5.22833	0.0583481	0.865703
deoR	-0.238706	6.4754	6.85788	0.0589242	0.869816
cybB	0.285348	6.68243	5.19077	0.059041	0.869816
yfgD	-0.242286	8.34938	5.12707	0.0602415	0.881778
aroC	0.199434	7.23924	5.11599	0.0604536	0.881778
astE	-0.606352	3.93597	33.676	0.0604853	0.881778
ygdR	-0.581192	8.56569	5.06392	0.0614638	0.890779
phoP	-0.266259	7.42546	5.06063	0.0615285	0.890779
grxD	0.239141	9.59428	5.02335	0.0622665	0.898355
malP	-0.413337	5.00903	4.97787	0.063183	0.908252
yebY	0.222755	6.92466	4.96788	0.0633866	0.908252
lexA	0.21179	8.63411	4.91067	0.0645704	0.921037
mlrA	-0.475903	4.50041	10.173	0.0649452	0.921037
pspB	0.641123	3.74971	15.793	0.0650361	0.921037
malQ	-0.435554	4.75999	16.3689	0.0651594	0.921037
dgkA	0.239632	6.35371	7.04876	0.0659401	0.928933
crcB	-0.21934	6.58045	4.95128	0.0662297	0.929883
gatZ	-0.256212	7.76799	4.82023	0.0665023	0.930588
ydgK	-0.358293	6.49277	4.80324	0.0668737	0.932666
ugpQ	-0.320638	5.56475	6.90104	0.0675412	0.936239
yhhA	-0.343158	5.3823	5.59031	0.0676907	0.936239
smrB	0.228016	6.46904	6.02491	0.0679505	0.936239
yfbU	0.218331	7.18799	4.75138	0.068025	0.936239
adhP	-0.46062	4.94984	4.73257	0.0684492	0.938146
ypfG	-0.561788	5.26139	4.71554	0.0688362	0.938146
yciG	-1.16567	3.245	4.71553	0.0688363	0.938146
artM	-0.302215	6.32406	4.67653	0.0697335	0.944811
lpxP	0.305823	7.80859	4.67466	0.0697769	0.944811
yidA	0.194593	7.41896	4.65953	0.0701296	0.946353
aroM	-0.385475	5.85549	4.6464	0.0704374	0.946353
bcsQ	-0.335846	5.33787	6.30969	0.0707617	0.946353
yraQ	-0.324254	5.59772	4.95227	0.0707955	0.946353
cysW	0.466634	7.37821	4.6045	0.0714321	0.951822
bfr	-0.340064	7.83622	4.51147	0.073709	0.979042
miaA	0.25228	8.93949	4.502	0.0739459	0.979081
livJ	0.485292	5.13731	4.47956	0.0745119	0.983464
mgtA	-0.362106	6.63465	4.46673	0.0748382	0.984663
astC	-0.784642	6.11258	4.43893	0.0755516	0.987992
mtgA	0.580146	3.89938	5.27165	0.0756527	0.987992
phoQ	-0.233382	6.30312	5.45621	0.0757996	0.987992
ansP	0.664725	3.56149	26.7396	0.0765189	0.99056
mliC	-0.564937	5.2176	4.3981	0.076616	0.99056
lpxD	-0.24654	9.85202	4.37716	0.0771699	0.99056
queE	-0.324765	7.83405	4.37692	0.0771761	0.99056
tomB	0.208997	8.40597	4.37561	0.0772111	0.99056
fabA	0.266352	10.2589	4.36422	0.0775146	0.99056
thrS	0.201106	9.30416	4.35164	0.0778518	0.99056
pepQ	0.204425	8.37636	4.34364	0.0780673	0.99056
ahpF	-0.207272	7.72543	4.34142	0.0781274	0.99056
potF	-0.371351	5.01322	4.45076	0.0785539	0.99125
ldcC	-0.378245	5.01047	11.4968	0.0787607	0.99125
acrR	0.299758	5.93269	4.31327	0.0788925	0.99125
chaB	-0.664149	3.53768	5.29853	0.0794519	0.99529
mtfA	0.386343	4.91246	4.9101	0.0806905	0.999943
alx	0.384929	4.94166	6.61165	0.081481	0.999943
gmm	-0.794348	3.10858	8.96911	0.0817912	0.999943
mglC	-0.692936	4.8782	4.20523	0.0819249	0.999943
gcvH	0.219055	9.75938	4.19622	0.0821846	0.999943
yjdC	-0.201352	6.79154	4.19484	0.0822246	0.999943
cysA	0.473137	7.74662	4.19412	0.0822455	0.999943
glgB	-0.209935	6.53071	4.7168	0.0823853	0.999943
yfcG	-0.675686	3.4716	16.4631	0.0829437	0.999943
pfkB	-0.247682	6.7339	4.16852	0.0829907	0.999943
yfiF	0.265283	8.2594	4.16734	0.0830252	0.999943
radA	0.260149	6.91533	4.15563	0.0833693	0.999943
mglA	-0.757348	4.87037	4.14286	0.0837466	0.999943
osmE	-0.456686	6.85747	4.1275	0.0842035	0.999943
zntA	-0.297888	5.91002	4.07778	0.0857058	0.999943
gapC	-0.220424	7.92598	4.06503	0.0860971	0.999943
yjbF	-1.01947	2.55891	7.03493	0.086377	0.999943
puuE	0.350065	5.06095	4.65611	0.0865179	0.999943
dinJ	0.221091	8.55635	4.03936	0.0868915	0.999943
glnB	-0.190844	7.74374	4.02685	0.0872824	0.999943
bhsA	0.433182	6.75633	4.00221	0.0880592	0.999943
ycgB	-0.54549	4.17667	3.95298	0.0896388	0.999943
ybaK	-0.263563	6.30025	3.93888	0.0900981	0.999943
mcbR	-0.716543	3.28412	23.0213	0.0901307	0.999943
yfhL	-0.297607	5.60217	3.93716	0.0901546	0.999943
setA	-0.319068	5.77477	3.92674	0.0904962	0.999943
prpR	-0.727119	3.24617	22.3289	0.0906643	0.999943
rluF	0.217494	6.48814	3.90025	0.0916573	0.999943
hslO	0.255121	6.62219	3.853	0.0929659	0.999943
ydgA	-0.184536	7.24576	3.85006	0.0930665	0.999943
phr	-0.402649	4.7048	13.9291	0.0935909	0.999943
gabD	-0.638287	3.52798	25.8928	0.0936588	0.999943
uxuR	0.278108	6.19083	3.82924	0.0937812	0.999943
holC	0.23924	6.14525	4.47706	0.0945905	0.999943
yrhA	-0.398202	4.74499	11.2261	0.0947089	0.999943
yhdW	-0.818298	4.44606	3.78629	0.0952792	0.999943
dcyD	0.213826	6.36521	4.21046	0.0955807	0.999943
yeeZ	0.273651	7.4115	3.74939	0.0965919	0.999943
pspD	0.696884	3.29477	10.7421	0.0966273	0.999943
tsx	0.209095	9.87369	3.74384	0.0967915	0.999943
ghrA	0.271053	5.7983	4.15445	0.0973776	0.999943
trmO	-0.261144	6.62033	3.67306	0.0993856	0.999943
ndh	0.744117	7.48124	3.66725	0.0996029	0.999943
hemD	0.203434	6.97893	3.64581	0.10041	0.999943
pgl	-0.203299	6.7	3.64503	0.100439	0.999943
argF	0.312579	5.34389	7.7759	0.100505	0.999943
cpxA	0.18878	7.11694	3.63703	0.100743	0.999943
yegP	-0.532755	3.90864	10.5469	0.10097	0.999943
ggt	-0.422363	4.50655	11.0812	0.102161	0.999943
curA	-0.41965	4.52378	13.4012	0.102621	0.999943
fbp	-0.272028	8.53335	3.57029	0.103322	0.999943
ugpC	-0.383967	4.75762	12.5066	0.104326	0.999943
nac	-0.650923	5.96486	3.51773	0.105417	0.999943
glgC	-0.285676	6.49792	3.50165	0.106069	0.999943
yqaA	-0.206999	6.48161	4.95761	0.106596	0.999943
ygfI	-0.597966	3.59001	21.5648	0.106657	0.999943
ynfM	1.0696	7.14066	3.47771	0.107051	0.999943
phnP	-0.473723	4.17089	18.1905	0.107557	0.999943
dkgA	-0.349875	4.9596	11.5342	0.107678	0.999943
nadR	0.214951	6.53806	3.45377	0.108044	0.999943
wcaF	-1.07192	2.33682	11.8548	0.108438	0.999943
yjbT	-0.779176	2.96288	9.6398	0.109228	0.999943
ycaM	-0.752685	3.03956	17.5329	0.109556	0.999943
yjaB	0.396952	4.59451	12.453	0.111099	0.999943
grxA	-0.305119	5.50508	3.37882	0.111237	0.999943
ybjD	-0.312641	5.24541	9.78713	0.111799	0.999943
murE	-0.194939	7.79998	3.35771	0.112159	0.999943
yhjR	-0.35158	6.47696	3.35633	0.11222	0.999943
grpE	0.217976	9.45994	3.35627	0.112222	0.999943
yhcN	-0.462947	7.62134	3.35035	0.112483	0.999943
ddpX	-0.615439	4.42239	3.35032	0.112484	0.999943
cueO	-0.306932	5.33986	4.83435	0.112664	0.999943
hicA	-0.945575	2.54819	9.35679	0.112804	0.999943
ymcE	-0.560281	3.70439	7.69187	0.113255	0.999943
treF	-0.419112	4.39886	8.62903	0.116011	0.999943
tolQ	-0.300295	7.78449	3.2693	0.116136	0.999943
polA	0.185128	7.00775	3.26758	0.116215	0.999943
znuA	0.283807	5.50522	3.24789	0.117127	0.999943
dsbA	0.430901	8.94155	3.23768	0.117605	0.999943
glpQ	-0.324769	7.03874	3.21826	0.118519	0.999943
artI	-0.193327	6.88954	3.216	0.118626	0.999943
mglB	-0.682498	6.21722	3.20685	0.119061	0.999943
oxyR	0.167403	7.94484	3.20648	0.119079	0.999943
groS	0.347	9.09939	3.19198	0.119772	0.999943
hha	0.18327	9.28657	3.18629	0.120046	0.999943
malE	-0.64268	3.32579	4.20884	0.121287	0.999943
cysD	0.56123	8.24496	3.15234	0.121697	0.999943
yjdM	0.467245	8.03134	3.15109	0.121758	0.999943
yedP	-0.536268	3.74943	17.2948	0.121938	0.999943
nanA	0.498589	4.15373	3.14313	0.12215	0.999943
wcaE	-0.892813	2.60318	7.63268	0.122389	0.999943
yaiA	-0.175469	7.32289	3.13657	0.122474	0.999943
tesA	0.341814	6.22779	3.13494	0.122555	0.999943
gmhB	0.159609	7.10501	3.12937	0.122831	0.999943
asnB	0.854896	7.26747	3.12303	0.123147	0.999943
tyrS	0.201508	8.37236	3.10899	0.12385	0.999943
manY	-0.440151	7.7868	3.10892	0.123853	0.999943
slt	0.26329	5.69635	5.12977	0.123949	0.999943
pdxK	-0.216125	6.2047	4.37549	0.123971	0.999943
rcsF	-0.174264	7.81119	3.07181	0.125738	0.999943
osmC	-0.350781	6.22609	3.0223	0.128313	0.999943
lrhA	0.287713	6.53302	2.98027	0.130556	0.999943
melR	0.535395	4.88387	2.9779	0.130684	0.999943
cysK	0.256422	10.269	2.96967	0.131131	0.999943
yehX	-0.513933	3.79809	10.733	0.131367	0.999943
treA	-0.475267	4.00281	4.88193	0.131439	0.999943
cnu	-0.75937	3.80757	2.96368	0.131457	0.999943
chaA	0.469253	6.47223	2.93823	0.132854	0.999943
yjdJ	-0.475377	3.96542	4.68832	0.133552	0.999943
rhlB	0.157241	9.03693	2.9204	0.133845	0.999943
yjdN	-0.675619	3.12477	8.83017	0.133994	0.999943
ybjI	0.338384	4.90256	5.87719	0.134033	0.999943
aroP	0.221849	6.04487	4.10293	0.13416	0.999943
potH	-0.539958	3.64269	7.80185	0.135305	0.999943
groL	0.395301	10.0034	2.87668	0.136319	0.999943
yejG	0.177241	9.33239	2.87492	0.136419	0.999943
galU	-0.17666	8.43122	2.86797	0.136819	0.999943
cnoX	0.153663	7.48932	2.8647	0.137007	0.999943
yrhB	-0.434129	4.17443	13.6064	0.137158	0.999943
dinG	0.223864	5.95463	4.94826	0.137385	0.999943
serB	0.24802	6.87404	2.85643	0.137486	0.999943
mepH	-0.254745	5.53409	2.85565	0.13753	0.999943
aroA	0.15778	7.26827	2.85225	0.137728	0.999943
yfdY	0.362787	5.21061	2.84187	0.138333	0.999943
thrL	2.06983	1.36131	8.61124	0.138812	0.999943
dapB	-0.191729	7.31814	2.83315	0.138844	0.999943
galT	-0.191229	6.48409	3.45547	0.139302	0.999943
rclA	-0.477086	3.93134	18.1094	0.139348	0.999943
galE	-0.196971	7.34932	2.81955	0.139646	0.999943
yehW	-0.297309	5.22671	4.54443	0.140893	0.999943
malT	0.203808	7.57226	2.79535	0.141089	0.999943
hemN	0.178017	7.29105	2.7796	0.142039	0.999943
acpP	-0.204911	12.9108	2.76804	0.142742	0.999943
cspB	0.333233	9.42679	2.75866	0.143316	0.999943
aspA	0.357297	9.00545	2.74464	0.144179	0.999943
glgX	-0.240132	6.06363	2.73628	0.144698	0.999943
rlmE	0.194564	8.76657	2.73547	0.144748	0.999943
alaE	-0.522911	6.36018	2.72276	0.145542	0.999943
ymgE	-0.582365	3.39194	2.79476	0.146165	0.999943
ruvA	0.167279	6.69198	3.3719	0.147193	0.999943
mtlD	-0.269884	6.59104	2.68794	0.147746	0.999943
thiE	0.456809	4.19271	2.68722	0.147793	0.999943
rluA	0.216582	7.26407	2.68429	0.14798	0.999943
ampH	-0.239121	5.65645	5.00854	0.148186	0.999943
ugpE	-0.653864	3.11922	12.9832	0.148275	0.999943
ypeC	-0.485475	6.50469	2.67327	0.148689	0.999943
mltD	0.596825	8.31235	2.66768	0.14905	0.999943
rsgA	0.165447	7.77802	2.64441	0.150567	0.999943
tusB	-0.210744	6.6007	2.63679	0.151068	0.999943
yecN	-0.166438	6.73329	2.99288	0.151857	0.999943
nudI	-0.380797	4.43928	8.12577	0.152376	0.999943
yobA	0.322096	7.15597	2.61624	0.152432	0.999943
yebO	-0.208251	9.25831	2.61495	0.152519	0.999943
emrE	-0.283555	5.62977	2.61023	0.152835	0.999943
mqo	-0.17725	8.13767	2.60165	0.153411	0.999943
yhjJ	-0.176205	6.51118	3.25119	0.153484	0.999943
yhfA	0.161759	7.3078	2.59197	0.154065	0.999943
mntS	0.568291	7.61366	2.59025	0.154182	0.999943
malK	-0.816297	3.27189	2.57975	0.154896	0.999943
dmsD	0.258644	5.50684	4.92973	0.155828	0.999943
galK	-0.175304	6.55091	3.36481	0.157678	0.999943
secG	-0.279617	10.6017	2.5381	0.157776	0.999943
fdoG	0.350143	9.62706	2.52818	0.158473	0.999943
fadH	0.721423	2.84149	9.47163	0.158809	0.999943
mrp	0.166777	7.86699	2.5122	0.159604	0.999943
ybfP	-0.327315	4.78409	10.493	0.160076	0.999943
galR	0.359874	4.7669	2.49794	0.160623	0.999943
grxC	0.153611	8.2287	2.4961	0.160756	0.999943
wzb	-1.07215	2.09039	6.42173	0.161155	0.999943
maeB	0.178749	6.73972	2.48823	0.161323	0.999943
ycbX	0.220389	5.90301	2.50592	0.16173	0.999943
yfiL	-0.493199	3.70102	6.5003	0.161951	0.999943
mqsA	0.266566	6.75932	2.46806	0.162789	0.999943
yqjG	-0.356816	4.52787	9.20406	0.163328	0.999943
fadL	0.384254	7.34442	2.45726	0.163581	0.999943
dhaK	0.250504	8.38107	2.45323	0.163878	0.999943
ybfF	0.233701	5.72112	2.59884	0.163961	0.999943
pta	0.371363	8.59409	2.44561	0.164442	0.999943
yjbH	-0.683664	2.9293	33.9161	0.164889	0.999943
rnr	0.154799	7.29503	2.43467	0.165255	0.999943
fadE	0.380177	4.34579	7.90411	0.16546	0.999943
hemC	0.229079	7.69539	2.42941	0.165649	0.999943
yeiQ	0.326099	4.75144	2.69787	0.166879	0.999943
patA	-0.40692	4.14115	7.56888	0.167464	0.999943
ydgC	0.21971	5.86624	2.81156	0.168061	0.999943
ttcA	0.284467	6.51751	2.39594	0.168183	0.999943
cpsG	-0.778066	2.63979	8.50993	0.168297	0.999943
cysI	0.290173	8.47981	2.3832	0.169161	0.999943
yhcB	0.279816	9.49902	2.38082	0.169345	0.999943
manZ	-0.479442	7.88791	2.3713	0.170083	0.999943
thiQ	0.258029	5.33652	2.36784	0.170351	0.999943
glpT	-0.371562	6.55962	2.36559	0.170527	0.999943
pncB	0.167778	6.73372	2.36056	0.17092	0.999943
pspG	0.427588	4.00103	5.00911	0.171085	0.999943
yqcA	0.159891	6.71534	2.75162	0.171125	0.999943
yjgR	-0.318269	4.78413	9.701	0.171161	0.999943
ycdX	0.157194	7.35474	2.35488	0.171365	0.999943
tolA	-0.168491	7.96271	2.35068	0.171695	0.999943
prmB	0.190554	7.1015	2.34262	0.172331	0.999943
mscS	-0.220832	7.4626	2.34037	0.17251	0.999943
tcyP	0.261105	9.26229	2.33915	0.172606	0.999943
gadX	-0.596786	7.66543	2.33352	0.173053	0.999943
yjhU	0.185715	7.01565	2.32593	0.173659	0.999943
macA	0.311043	4.84154	3.86194	0.173747	0.999943
rob	0.144458	8.53119	2.32224	0.173954	0.999943
rseC	-0.193445	6.46952	2.32105	0.17405	0.999943
mzrA	0.21521	6.9641	2.28181	0.177239	0.999943
eutB	0.212833	7.13232	2.28115	0.177293	0.999943
yheV	-0.210873	5.88688	2.81225	0.177971	0.999943
aceE	0.355891	11.3028	2.24664	0.180166	0.999943
yaaX	-0.380062	6.32779	2.23652	0.18102	0.999943
pntA	0.213648	5.90785	2.65107	0.181033	0.999943
thiM	0.389719	4.16307	2.26265	0.181668	0.999943
pdxH	-0.186212	6.65386	2.21519	0.182841	0.999943
ugpA	-0.671797	2.87014	29.6373	0.18387	0.999943
srkA	0.241558	7.72544	2.20104	0.184063	0.999943
valS	0.216396	7.97535	2.19264	0.184793	0.999943
kefC	-0.363412	4.35303	7.61149	0.185702	0.999943
wrbA	-0.518918	6.80108	2.18213	0.185713	0.999943
tolR	-0.22206	7.47664	2.18162	0.185758	0.999943
yieP	0.388269	7.62217	2.18006	0.185895	0.999943
yhjG	-0.425498	3.92657	7.79249	0.185955	0.999943
opgD	0.202949	5.91295	2.46226	0.185975	0.999943
yebZ	0.281536	6.46309	2.16139	0.187547	0.999943
yhfG	-0.330842	4.57301	3.33715	0.188956	0.999943
fdoI	0.426988	9.28396	2.14184	0.1893	0.999943
lacZ	-0.23459	5.54978	4.80118	0.189757	0.999943
glnG	-0.199331	7.07512	2.13562	0.189862	0.999943
yecA	0.21642	7.0248	2.13321	0.190081	0.999943
hxpA	0.179111	7.36673	2.13029	0.190345	0.999943
ybfE	-0.2804	6.35883	2.12091	0.191201	0.999943
btuE	-0.206603	6.0743	2.11703	0.191557	0.999943
sbcB	0.220692	5.72687	2.70096	0.192005	0.999943
yfeC	0.240404	6.7869	2.10809	0.192379	0.999943
rseA	-0.186758	8.40437	2.10784	0.192402	0.999943
astA	-0.523352	5.32399	2.09474	0.193617	0.999943
menI	0.147966	6.74753	2.26958	0.193671	0.999943
flu	0.209626	9.39642	2.0852	0.194508	0.999943
ygiN	-0.211172	8.5224	2.085	0.194527	0.999943
yqjA	0.198455	7.02046	2.08481	0.194545	0.999943
gloA	0.273501	8.18793	2.08393	0.194627	0.999943
ybhB	-0.322244	7.66374	2.08288	0.194725	0.999943
yagN	0.326907	8.10364	2.08273	0.194739	0.999943
ypeB	-0.191479	6.10336	2.3005	0.194897	0.999943
ybjL	-0.185563	6.1539	3.2583	0.195799	0.999943
yiaF	-0.145673	8.59422	2.07132	0.195815	0.999943
dkgB	-0.293605	5.10728	2.06978	0.195961	0.999943
yfjW	-0.312697	4.65987	9.58982	0.196141	0.999943
fdoH	0.4318	9.01418	2.04777	0.198061	0.999943
argC	0.420854	3.88576	3.6735	0.198897	0.999943
bglJ	-0.31781	7.52248	2.03416	0.199375	0.999943
yddM	0.383923	6.44245	2.02777	0.199996	0.999943
mdtJ	-0.357217	5.2772	2.02388	0.200377	0.999943
potG	-0.400608	3.99138	4.31236	0.200892	0.999943
yhaJ	0.245179	6.53416	2.01309	0.201435	0.999943
opgE	-0.258857	5.84882	2.01136	0.201606	0.999943
ybjO	-0.301981	4.72036	5.22885	0.202489	0.999943
cpsB	-0.708548	2.66633	8.3336	0.202559	0.999943
lhgO	-0.676637	2.76249	28.464	0.202602	0.999943
yidQ	-0.189937	7.44887	1.99866	0.202863	0.999943
ftsI	-0.146528	6.72705	2.22085	0.203084	0.999943
sodB	0.440403	8.4865	1.98957	0.203769	0.999943
xynR	0.195378	6.54376	1.98591	0.204136	0.999943
hisP	0.210561	5.69577	3.42185	0.204487	0.999943
ymcF	0.163923	8.57144	1.97283	0.205455	0.999943
tsgA	0.224705	6.71969	1.96776	0.205968	0.999943
parC	0.172866	6.90153	1.96573	0.206175	0.999943
gcvT	0.275636	9.34879	1.96253	0.206501	0.999943
ybhG	0.293053	4.98785	1.96151	0.206605	0.999943
wzc	-0.742513	2.54891	4.11708	0.207418	0.999943
nfsA	0.21075	5.68988	4.39685	0.207482	0.999943
treR	-0.249493	5.21321	2.87137	0.207621	0.999943
yjcB	-0.198825	7.23483	1.94763	0.208029	0.999943
ivbL	1.22537	1.72458	3.01168	0.208811	0.999943
trpC	0.384487	4.97886	1.93528	0.209307	0.999943
pfkA	0.214306	8.94987	1.9316	0.209689	0.999943
sppA	0.160981	6.48297	3.08229	0.210305	0.999943
ygjR	0.198693	5.8413	2.44764	0.21039	0.999943
ldtA	-0.266649	5.00659	6.05473	0.210494	0.999943
sdaA	0.234796	7.934	1.92363	0.210523	0.999943
mdtH	-0.423296	4.29409	1.91695	0.211224	0.999943
hslU	0.196609	8.17132	1.91249	0.211694	0.999943
cysS	0.372795	7.98059	1.90623	0.212357	0.999943
ilvB	0.354646	4.78452	1.90304	0.212695	0.999943
cysZ	-0.264443	5.79933	1.90105	0.212908	0.999943
yeeE	0.197244	8.08103	1.89975	0.213045	0.999943
deoB	-0.235317	7.34895	1.89734	0.213303	0.999943
yaiW	-0.213622	5.96456	1.89631	0.213413	0.999943
yniA	-0.25323	5.44646	1.89587	0.213459	0.999943
ompW	0.436298	7.34809	1.89401	0.213659	0.999943
ybbA	0.263516	5.07147	3.55814	0.213679	0.999943
hrpA	0.217727	6.03055	1.8926	0.21381	0.999943
mlaC	-0.129663	8.22973	1.88454	0.214676	0.999943
yciF	-0.796901	3.12236	1.88435	0.214697	0.999943
sbmA	-0.261425	5.00371	2.50925	0.215636	0.999943
suhB	-0.464938	8.79969	1.87206	0.216027	0.999943
yagP	0.330257	5.05352	1.87161	0.216075	0.999943
ftsK	0.118087	7.28567	1.89026	0.216333	0.999943
yqgE	0.169905	6.91315	1.86735	0.21654	0.999943
ydhI	-0.378773	4.04969	6.65689	0.217141	0.999943
mipA	0.147613	8.47408	1.85744	0.217624	0.999943
leuE	-0.255171	5.09014	5.34426	0.217678	0.999943
yhbW	-0.238133	5.30069	4.05155	0.218004	0.999943
yaaA	0.16014	6.4029	2.66318	0.218408	0.999943
lolD	0.20939	6.68957	1.85002	0.218442	0.999943
ydfK	0.269395	5.83794	1.84589	0.218899	0.999943
ybjP	-0.296846	4.67832	4.05507	0.219457	0.999943
mqsR	0.242135	6.90823	1.8361	0.219986	0.999943
acpT	-0.173841	6.16312	1.95438	0.220116	0.999943
yigI	-0.186596	7.56393	1.83411	0.220208	0.999943
ldrD	-0.459014	3.55487	5.62883	0.220242	0.999943
yafE	-0.285917	5.56482	1.83246	0.220392	0.999943
relE	0.200832	6.42578	1.83074	0.220585	0.999943
ddpA	-0.472109	3.82664	1.82679	0.221028	0.999943
ccmA	0.291754	5.53135	1.82569	0.221152	0.999943
selD	0.120418	7.54066	1.81907	0.221898	0.999943
mokB	-0.220925	5.47585	2.51207	0.224199	0.999943
yghE	-0.19519	6.13798	1.79692	0.22442	0.999943
mdtI	-0.350369	5.00601	1.7929	0.224881	0.999943
yeiG	0.216667	6.89439	1.79248	0.22493	0.999943
rraB	0.24025	10.4179	1.78491	0.225804	0.999943
deoA	-0.2738	5.86435	1.78471	0.225827	0.999943
ompT	0.161254	10.625	1.78302	0.226023	0.999943
rarD	-0.272645	6.55221	1.78035	0.226333	0.999943
ppiB	0.151212	10.1589	1.77804	0.226602	0.999943
yghJ	0.227823	6.09441	1.77803	0.226603	0.999943
yggL	0.205925	7.80576	1.77309	0.227179	0.999943
pstC	-0.309376	5.69595	1.76933	0.227618	0.999943
hemX	0.130479	7.19844	1.76791	0.227785	0.999943
cca	-0.139337	6.65798	2.30338	0.228414	0.999943
cspE	-0.154874	14.8429	1.7584	0.228904	0.999943
psiF	-0.25132	4.99704	2.32744	0.228973	0.999943
glgP	-0.235405	6.71415	1.75487	0.229322	0.999943
ykgS	-0.462238	3.66535	1.74687	0.230271	0.999943
yhjY	-0.46457	4.53902	1.74638	0.230329	0.999943
argO	-0.281342	4.73221	4.55706	0.231437	0.999943
bcsF	-0.274999	4.75705	4.51042	0.23165	0.999943
mcbA	-0.374819	3.98644	7.00697	0.231664	0.999943
xseA	-0.170761	6.03061	2.29861	0.231762	0.999943
nhaA	0.294416	6.97888	1.7266	0.232703	0.999943
csrA	-0.134301	10.6567	1.72155	0.233315	0.999943
ydhR	0.121665	7.58906	1.72078	0.233408	0.999943
ybeM	-0.344942	4.18679	1.74168	0.233442	0.999943
arcB	0.211288	6.58449	1.71757	0.233799	0.999943
nagA	-0.155396	6.32342	2.29247	0.233857	0.999943
yibL	0.131771	7.68175	1.71638	0.233944	0.999943
cycA	0.120608	7.44866	1.71609	0.233979	0.999943
yncG	-0.663614	2.65671	15.1165	0.234042	0.999943
cmoM	0.123418	6.99375	1.87979	0.234168	0.999943
yrdA	0.309097	7.50661	1.70948	0.234786	0.999943
trxA	0.127185	11.5251	1.70818	0.234946	0.999943
yobD	-0.545297	5.14208	1.70316	0.235561	0.999943
ileS	0.128295	8.74187	1.70195	0.23571	0.999943
clcA	-0.268311	5.33509	1.70044	0.235897	0.999943
pmrR	-1.28083	1.5888	2.69113	0.23802	0.999943
gntP	-0.329073	4.3205	2.80564	0.238676	0.999943
degS	-0.16151	6.37274	1.676	0.238938	0.999943
mgsA	0.139587	7.91261	1.67289	0.239328	0.999943
ynaL	-0.836797	2.19869	2.87173	0.239784	0.999943
mtlA	-0.225326	5.32814	2.92006	0.240075	0.999943
ygfX	0.137854	6.90918	1.66378	0.240479	0.999943
lplA	0.205335	5.60467	2.36396	0.240932	0.999943
tolB	-0.142254	9.37156	1.65356	0.24178	0.999943
sufE	-0.339935	4.20045	1.67582	0.242278	0.999943
cspF	-0.198446	5.69578	2.44387	0.242404	0.999943
dsbG	-0.182	5.89795	2.40081	0.24264	0.999943
ldhA	0.166064	6.12683	2.29752	0.242731	0.999943
csrD	-0.206099	5.48001	2.45466	0.242998	0.999943
ynaM	0.282301	5.08512	1.64345	0.243076	0.999943
ybjJ	0.31917	4.37153	4.82304	0.243511	0.999943
ycaP	-0.372361	3.94028	5.2882	0.243769	0.999943
yeiE	0.244807	5.36335	1.62663	0.245256	0.999943
ykgO	0.543212	3.02943	3.58775	0.245698	0.999943
zur	0.141004	6.79253	1.6229	0.245742	0.999943
dgcP	0.1649	6.50747	1.62138	0.245942	0.999943
mmuM	0.251825	4.97025	1.81007	0.246162	0.999943
rraA	0.225419	9.22391	1.61863	0.246302	0.999943
ygdQ	-0.273356	6.491	1.61781	0.246409	0.999943
sdhE	0.139011	8.61887	1.61495	0.246785	0.999943
nfeR	0.166389	6.11149	1.7376	0.24693	0.999943
cydC	0.199534	5.63412	4.10176	0.247048	0.999943
yciO	0.180485	5.95688	1.61233	0.24713	0.999943
tfaX	1.2496	1.59094	3.7392	0.247326	0.999943
cobU	0.233448	5.17353	1.97705	0.247876	0.999943
oppA	0.123879	10.2277	1.60548	0.248035	0.999943
yciN	0.125372	9.19215	1.60532	0.248058	0.999943
ybhN	-0.498616	3.21256	7.32464	0.248064	0.999943
narJ	-0.752842	3.04692	1.60452	0.248164	0.999943
ribB	0.555988	8.94575	1.59487	0.249448	0.999943
ychJ	0.138136	6.81928	1.59391	0.249577	0.999943
zraS	0.343425	4.11079	1.71778	0.250753	0.999943
gpmM	0.307041	9.05238	1.57144	0.252609	0.999943
yhdN	-0.270677	6.04463	1.56973	0.252841	0.999943
yfhR	-0.535158	3.02987	18.76	0.253119	0.999943
ydcF	-0.206154	5.48226	2.54258	0.253401	0.999943
agp	-0.292183	4.54639	4.2821	0.253896	0.999943
yicN	0.175797	5.88382	2.06658	0.254149	0.999943
vsr	0.233185	5.05768	2.55695	0.254213	0.999943
yciK	0.241454	5.0129	2.82117	0.254417	0.999943
ydcY	0.14212	8.08475	1.55531	0.254817	0.999943
glcB	0.419523	5.48652	1.55474	0.254896	0.999943
ygfF	-0.201303	5.93503	1.55426	0.254962	0.999943
asnC	0.280693	4.64576	2.40635	0.255074	0.999943
yfbP	-0.270162	4.77932	1.70832	0.255235	0.999943
ydhF	0.202758	5.48807	2.82997	0.256485	0.999943
ybiO	-0.448585	3.41632	8.41562	0.256904	0.999943
mraY	-0.159931	7.31748	1.53794	0.257228	0.999943
yeeX	0.388986	10.0848	1.5376	0.257276	0.999943
lysA	0.298068	4.42773	3.33976	0.257306	0.999943
yecU	0.897612	2.01195	6.29226	0.257509	0.999943
lpcA	0.112906	8.12034	1.53588	0.257516	0.999943
ldtB	-0.300852	9.00561	1.52508	0.259035	0.999943
dppA	0.39675	7.06231	1.52414	0.259168	0.999943
hcaR	0.235234	5.0824	2.519	0.259261	0.999943
ilvN	0.334607	4.14224	1.72504	0.259304	0.999943
dxr	-0.18536	7.04143	1.52236	0.259419	0.999943
ynaI	-0.309435	4.3304	8.72602	0.259852	0.999943
ynfD	0.310945	4.30791	2.52187	0.259966	0.999943
malI	0.368867	3.87329	4.04905	0.260625	0.999943
nagB	-0.180941	6.15696	1.51381	0.260633	0.999943
yeeA	-0.314461	4.29188	7.41628	0.261499	0.999943
yeaR	-0.897916	1.99862	5.83275	0.261911	0.999943
putA	0.412893	6.13526	1.50438	0.261981	0.999943
thiG	0.346459	4.13302	1.50202	0.26232	0.999943
rsmH	-0.140405	7.31804	1.50167	0.262371	0.999943
galM	-0.168631	7.76003	1.49692	0.263055	0.999943
zapE	0.246309	5.88318	1.49463	0.263386	0.999943
yhfL	-0.439121	3.43342	5.59603	0.263557	0.999943
emrB	-0.210656	5.47173	1.49147	0.263843	0.999943
dinD	0.212645	5.32202	2.19601	0.26417	0.999943
ubiG	0.138434	6.7848	1.4891	0.264187	0.999943
napG	0.444718	5.16182	1.48571	0.264682	0.999943
speD	0.170881	7.88405	1.48481	0.264812	0.999943
moeA	0.137444	6.49426	1.95496	0.265163	0.999943
ykgM	0.302194	4.393	5.65497	0.26562	0.999943
yciH	0.22217	6.26092	1.47708	0.265944	0.999943
ykgJ	-0.29433	4.50737	1.47597	0.266107	0.999943
speG	-0.226825	5.39346	1.47036	0.266931	0.999943
hisG	0.381692	5.66732	1.46846	0.267212	0.999943
pliG	0.272059	4.61936	7.00207	0.26749	0.999943
yciX	0.240016	5.00106	1.58352	0.270002	0.999943
ybhQ	0.213312	6.18764	1.44751	0.270335	0.999943
hemE	0.138724	7.45033	1.44582	0.270588	0.999943
yaiZ	0.237254	7.3567	1.44511	0.270696	0.999943
yedE	-0.151677	6.30422	1.52199	0.270975	0.999943
tam	-0.360118	3.88629	11.9879	0.271115	0.999943
intB	-0.179637	5.75768	1.95079	0.271268	0.999943
yecM	0.229332	5.07978	4.78922	0.271446	0.999943
codA	0.227936	8.11817	1.43994	0.271475	0.999943
ynaJ	0.118923	10.2586	1.43217	0.272655	0.999943
gpp	0.113495	7.02663	1.51921	0.272781	0.999943
aceF	0.32835	11.1531	1.42727	0.273401	0.999943
yjfN	-0.249398	4.81707	2.05326	0.27348	0.999943
metK	-0.164687	7.77787	1.42613	0.273576	0.999943
ylaC	0.188115	6.89781	1.4259	0.273611	0.999943
gnsB	-0.14727	9.14505	1.42465	0.273802	0.999943
ftsH	0.128927	9.62342	1.42109	0.274348	0.999943
gshB	0.109494	7.07241	1.48404	0.27448	0.999943
yhhH	-0.399574	3.60871	9.04548	0.274801	0.999943
glcG	0.431691	5.39923	1.41687	0.274998	0.999943
insA-7	0.244957	5.46671	1.4162	0.275101	0.999943
csiD	-0.549116	2.86704	15.375	0.275706	0.999943
bioC	0.142777	7.18484	1.412	0.27575	0.999943
ilvY	0.268838	4.61817	2.76394	0.275849	0.999943
menF	-0.159991	6.28038	1.41083	0.275931	0.999943
zwf	0.111811	7.78629	1.40983	0.276087	0.999943
lgoR	0.49615	3.08128	1.75728	0.27666	0.999943
rsxA	-0.312035	5.44521	1.40234	0.27725	0.999943
ytfJ	0.239669	4.9059	3.249	0.277494	0.999943
sseA	0.179224	6.14501	1.40031	0.277568	0.999943
tyrP	-0.223705	5.18489	3.04247	0.279201	0.999943
ydiJ	0.224924	6.36919	1.38897	0.279348	0.999943
mntH	0.20756	6.46447	1.38791	0.279514	0.999943
uspB	-0.273489	5.91127	1.38096	0.280616	0.999943
cydX	0.132232	7.07135	1.37773	0.281129	0.999943
thiD	0.390263	3.81126	1.37743	0.281177	0.999943
abgR	0.422679	3.43516	8.45948	0.281253	0.999943
ldcA	0.249657	5.13126	1.3758	0.281438	0.999943
nemR	-0.313006	4.18179	3.77779	0.281803	0.999943
grxB	0.125315	7.05704	1.37332	0.281832	0.999943
wcaJ	-0.774414	2.17133	11.0744	0.281902	0.999943
sthA	0.122936	9.88285	1.37073	0.282247	0.999943
ydhS	-0.450647	3.27309	2.84695	0.282943	0.999943
ada	-0.29731	4.33408	6.22002	0.283175	0.999943
narL	-0.173697	5.64318	1.35486	0.284807	0.999943
yedL	-0.586435	3.24088	1.3547	0.284832	0.999943
creA	0.149543	6.23978	1.47746	0.285596	0.999943
hybG	-0.209329	5.23348	1.60492	0.28603	0.999943
plaP	-0.148523	7.36385	1.34719	0.286055	0.999943
fucR	0.229007	5.06663	1.77769	0.286117	0.999943
dppB	0.27549	5.48137	1.34393	0.286589	0.999943
idi	-0.257898	4.68058	5.54697	0.286698	0.999943
araC	0.209917	7.07801	1.34314	0.286719	0.999943
yqiA	-0.176596	6.96961	1.33637	0.287832	0.999943
yihL	0.252012	4.68334	1.85332	0.287991	0.999943
tcyL	0.177036	5.56554	1.658	0.28809	0.999943
yhjD	-0.350068	4.41176	1.33324	0.288348	0.999943
bluF	0.185751	5.66459	1.82785	0.288461	0.999943
yjbG	-0.636016	2.50601	5.28158	0.28897	0.999943
mdaB	-0.207842	6.46817	1.32931	0.288999	0.999943
trpB	0.201575	5.35658	2.2277	0.289881	0.999943
ilvD	0.187129	5.57841	1.3334	0.292468	0.999943
yeeR	0.254428	6.54526	1.30334	0.293357	0.999943
rpoN	0.116397	8.05043	1.30248	0.293502	0.999943
yhdT	-0.370943	5.78602	1.29584	0.294633	0.999943
ybdG	-0.198003	5.93782	1.29525	0.294734	0.999943
pldA	-0.181463	6.67931	1.29259	0.295189	0.999943
ddpF	-0.56451	2.71638	8.95818	0.295852	0.999943
yshB	0.376285	3.64232	4.07025	0.295934	0.999943
ilvE	0.25419	6.06882	1.28785	0.296002	0.999943
tatB	0.14454	8.84603	1.28367	0.296722	0.999943
narH	-0.953708	3.90547	1.28348	0.296754	0.999943
macB	0.257766	4.64698	3.43229	0.297313	0.999943
nsrR	0.100719	7.84614	1.27459	0.298295	0.999943
hemG	0.120533	6.71221	1.7174	0.298445	0.999943
emrA	-0.207284	5.80795	1.27342	0.298499	0.999943
nanR	0.197501	6.59131	1.27112	0.2989	0.999943
acrZ	-0.248405	5.53999	1.26943	0.299195	0.999943
sfmC	0.453344	3.18047	5.64814	0.299306	0.999943
rayT	0.228527	5.36295	1.26555	0.299874	0.999943
intF	0.203862	6.07884	1.2649	0.299988	0.999943
gluQ	-0.192787	5.44089	1.43688	0.300143	0.999943
nadD	-0.199484	6.85675	1.26143	0.300597	0.999943
yedR	-0.255938	4.71045	1.25783	0.301231	0.999943
pphA	-0.307457	4.11952	5.18793	0.301271	0.999943
yagB	0.187526	5.5925	1.25649	0.301468	0.999943
yohD	-0.200541	5.25247	2.81324	0.301854	0.999943
tqsA	0.333615	3.91204	1.31299	0.301856	0.999943
gltJ	-0.162835	5.93823	2.3175	0.302325	0.999943
yeaL	-0.254478	4.61318	6.36865	0.302339	0.999943
aspC	0.101965	8.75693	1.24984	0.302647	0.999943
ucpA	0.191303	6.69443	1.24564	0.303396	0.999943
grcA	0.389611	11.2139	1.24304	0.30386	0.999943
rfaH	-0.198163	6.6333	1.2411	0.304207	0.999943
napF	0.618683	6.88455	1.23883	0.304615	0.999943
fadR	0.169983	7.60147	1.2362	0.305088	0.999943
wcaA	-0.611857	2.51135	4.35477	0.305595	0.999943
higB	0.272769	4.40723	5.60665	0.305904	0.999943
yqjF	-0.370445	3.63309	8.91375	0.305939	0.999943
sfsA	-0.142432	7.03651	1.22645	0.30685	0.999943
cspA	0.183231	14.6025	1.22488	0.307133	0.999943
yoaG	-0.853912	1.92005	2.46802	0.308397	0.999943
hisD	0.300864	5.17759	1.21208	0.309474	0.999943
ypdB	0.200751	5.28534	2.71298	0.310648	0.999943
hisQ	0.20283	6.23823	1.20461	0.310852	0.999943
ycgL	0.141426	6.27346	1.33505	0.311098	0.999943
apt	-0.142296	8.21802	1.20261	0.311222	0.999943
clpS	0.341041	7.15772	1.2026	0.311225	0.999943
bioH	0.161745	5.81043	2.75097	0.311385	0.999943
gsiC	-0.189438	5.45084	2.87924	0.311832	0.999943
yjjY	-0.273864	7.145	1.1966	0.312341	0.999943
clpP	0.153077	8.10781	1.19363	0.312894	0.999943
yafP	-0.18698	5.34319	2.22289	0.31385	0.999943
mnmC	0.19266	5.26683	1.34924	0.31416	0.999943
ycdY	0.145452	7.6069	1.1859	0.314346	0.999943
dam	-0.18407	7.49697	1.18352	0.314792	0.999943
ykfA	-0.198081	5.25909	3.03278	0.314957	0.999943
ycgZ	0.330953	6.32602	1.17874	0.315696	0.999943
pepN	-0.105407	7.68763	1.17838	0.315765	0.999943
alpA	0.640672	2.37957	5.7361	0.315881	0.999943
yajO	-0.152427	6.01714	1.60298	0.31608	0.999943
ydcS	-0.477415	2.98113	11.0194	0.317444	0.999943
moeB	0.13259	6.3223	1.16928	0.317497	0.999943
yeeY	0.234042	4.80319	1.61409	0.3186	0.999943
yceB	-0.199649	7.15873	1.16151	0.318989	0.999943
yheU	0.205279	5.12353	2.32068	0.319975	0.999943
nfeF	0.215218	6.03259	1.14894	0.321422	0.999943
tatA	0.131026	9.67614	1.14557	0.32208	0.999943
purR	0.201157	7.83792	1.14443	0.322302	0.999943
yhhT	-0.302615	4.03849	2.80711	0.322429	0.999943
wzzB	-0.189888	9.15119	1.13868	0.32343	0.999943
argP	0.310152	6.63427	1.13633	0.323893	0.999943
ygiF	0.153985	6.1422	1.13155	0.324836	0.999943
yibH	-0.486141	2.90206	4.19971	0.325307	0.999943
yobF	-0.316719	3.91113	1.28715	0.325389	0.999943
purT	0.33937	8.9371	1.12688	0.325763	0.999943
trxC	-0.12612	7.52048	1.1262	0.325898	0.999943
ribA	0.144173	7.49281	1.1248	0.326177	0.999943
yaeH	0.180258	6.75031	1.11749	0.327638	0.999943
tyrR	0.213112	6.19497	1.11687	0.327761	0.999943
yhcF	-0.269701	4.29601	2.22339	0.32794	0.999943
brnQ	0.0968401	7.09807	1.11779	0.328305	0.999943
serC	0.181108	8.63567	1.11282	0.328576	0.999943
narX	-0.343572	5.16089	1.11234	0.328673	0.999943
yibS	0.460396	3.00164	6.8283	0.329699	0.999943
ccmH	0.219286	4.82814	2.63207	0.330335	0.999943
ydfG	0.117276	7.58054	1.10328	0.330507	0.999943
tgt	0.182116	8.20605	1.09761	0.331662	0.999943
frmR	0.150026	5.93557	1.3173	0.33277	0.999943
fur	0.134932	9.89691	1.09113	0.332991	0.999943
ydjO	0.249753	5.84533	1.08871	0.333489	0.999943
ubiC	0.109469	7.39193	1.08838	0.333556	0.999943
yebQ	-0.371929	3.47615	9.42186	0.335124	0.999943
ydhJ	-0.311297	3.90887	6.70938	0.336637	0.999943
hsdS	0.115797	6.61013	1.07325	0.336697	0.999943
hslR	0.148763	6.47219	1.07254	0.336848	0.999943
yedJ	0.156206	5.83602	1.43721	0.337251	0.999943
nei	-0.160203	5.71591	2.76888	0.337533	0.999943
yihA	0.197066	8.31605	1.06927	0.337533	0.999943
igaA	-0.131628	6.296	1.93514	0.337798	0.999943
yjbQ	-0.222851	6.91915	1.06728	0.33795	0.999943
ghrB	0.105949	7.11429	1.06668	0.338078	0.999943
yjiT	-0.173135	5.42695	2.91515	0.338574	0.999943
nlpE	-0.134008	6.134	2.07861	0.339479	0.999943
hflK	0.20237	9.03696	1.05424	0.340711	0.999943
thiC	0.336888	4.45602	1.05411	0.340738	0.999943
relB	0.172478	5.62079	1.05173	0.341246	0.999943
lolA	-0.107545	7.46921	1.05122	0.341355	0.999943
folX	0.100994	7.5618	1.04918	0.341793	0.999943
holA	-0.188524	7.28553	1.04452	0.342792	0.999943
ymjA	-0.167387	5.49311	1.90632	0.342832	0.999943
exuR	0.193602	7.08827	1.04234	0.343262	0.999943
yheO	-0.11081	7.50882	1.04153	0.343436	0.999943
wcaC	-0.656495	2.2303	9.36467	0.343486	0.999943
ldtD	-0.169985	5.40833	1.22454	0.343522	0.999943
sixA	0.116113	7.59745	1.0401	0.343745	0.999943
rne	0.0957829	8.16423	1.03988	0.343793	0.999943
yjtD	0.131778	6.16053	2.11407	0.343817	0.999943
helD	0.159977	5.71344	1.91487	0.344106	0.999943
tabA	0.107968	6.6885	1.07211	0.344243	0.999943
yedF	-0.146329	6.5697	1.03406	0.345053	0.999943
yjaZ	-0.149899	5.68442	1.35376	0.34568	0.999943
flgM	0.350229	3.55972	2.70853	0.346005	0.999943
rsuA	-0.106112	7.39386	1.0281	0.346351	0.999943
slyA	0.106357	6.71787	1.46784	0.346609	0.999943
yfdC	-0.306625	3.87567	1.13995	0.347131	0.999943
yfbV	0.138463	6.11213	1.69673	0.347133	0.999943
yfjT	-0.384014	3.33187	3.12228	0.34767	0.999943
speE	0.140071	7.64269	1.02085	0.347941	0.999943
dcuR	0.158349	5.63893	2.14505	0.348068	0.999943
ompX	-0.150804	13.2945	1.01789	0.348595	0.999943
ppnP	0.167631	8.67613	1.01772	0.348632	0.999943
tsaE	-0.14971	5.77967	1.67379	0.349044	0.999943
yqeG	0.270022	6.04147	1.01507	0.349219	0.999943
htpG	0.278196	7.62752	1.0146	0.349323	0.999943
tusD	-0.134547	7.28786	1.00876	0.35062	0.999943
uspA	0.433824	7.9834	1.00586	0.351265	0.999943
nuoK	-0.202279	8.19942	1.00329	0.351842	0.999943
thiH	0.254775	4.32384	1.00958	0.352018	0.999943
btuR	0.174871	5.33375	2.83002	0.35248	0.999943
tatE	-0.118175	9.32561	0.99931	0.352734	0.999943
sdhA	-0.184371	10.4973	0.997779	0.353079	0.999943
pgpA	0.0941173	7.63099	0.997684	0.3531	0.999943
fimI	0.125645	11.359	0.99698	0.353259	0.999943
rnc	-0.262578	8.07977	0.994468	0.353826	0.999943
alaA	0.182248	6.99876	0.993821	0.353972	0.999943
ybhC	0.272656	4.14185	6.16645	0.354684	0.999943
ycfP	0.370377	8.47501	0.989833	0.354876	0.999943
bcsG	-0.143531	5.93233	1.95259	0.354915	0.999943
iscA	0.308133	9.73793	0.987769	0.355345	0.999943
yajC	0.11745	9.64589	0.985408	0.355883	0.999943
trpA	0.188938	5.101	3.15643	0.35615	0.999943
nadE	0.0899056	7.63274	0.979277	0.357285	0.999943
dppD	0.193898	6.62012	0.971682	0.359035	0.999943
yjhV	-0.281124	5.56342	0.97057	0.359292	0.999943
yajD	0.146126	7.28792	0.967975	0.359894	0.999943
pdeL	0.138891	5.94156	1.04665	0.360392	0.999943
glf	0.200065	8.92935	0.964466	0.36071	0.999943
fumC	-0.203757	5.53427	0.96375	0.360877	0.999943
gloB	0.15576	5.60714	1.38036	0.361022	0.999943
rluB	0.330285	8.14986	0.961969	0.361292	0.999943
topB	0.111727	6.46474	1.20823	0.361323	0.999943
narG	-1.24565	5.63344	0.961039	0.361509	0.999943
narK	-1.18137	5.86574	0.96036	0.361668	0.999943
napB	0.247211	5.0223	0.956998	0.362456	0.999943
minE	0.121711	7.73489	0.952437	0.363529	0.999943
viaA	0.345132	5.95382	0.952327	0.363555	0.999943
amtB	-0.433284	6.94538	0.950248	0.364046	0.999943
ydbL	0.195593	5.03058	2.28521	0.364622	0.999943
rihA	0.179	5.59803	0.946009	0.36505	0.999943
gsiD	-0.17432	5.35979	2.15422	0.36586	0.999943
rrrD	0.249105	4.33327	3.63751	0.365899	0.999943
xisD	0.357031	3.40988	2.76566	0.366577	0.999943
hsdR	0.128307	6.21381	1.21752	0.366781	0.999943
ytfB	0.169326	7.07048	0.938608	0.366814	0.999943
hchA	-0.192187	5.04867	2.78636	0.367546	0.999943
yiiS	-0.448188	5.74062	0.935091	0.367657	0.999943
cobT	0.176579	5.33351	1.2161	0.367888	0.999943
nuoN	-0.201777	8.70915	0.933916	0.367939	0.999943
yhbT	0.376153	7.89628	0.932064	0.368385	0.999943
yieK	0.279552	4.00594	1.92079	0.368691	0.999943
scpC	-0.456793	2.839	8.28023	0.369162	0.999943
napH	0.321855	4.87147	0.925496	0.369972	0.999943
rcdA	0.252722	4.25674	6.11663	0.370365	0.999943
ytfF	-0.170856	5.29961	2.64681	0.371153	0.999943
mdtG	-0.30505	3.77647	7.66404	0.371398	0.999943
cysN	0.310076	7.77248	0.919343	0.371469	0.999943
yicH	-0.138019	6.07169	0.917459	0.37193	0.999943
phnO	-0.285368	3.93419	2.86671	0.372194	0.999943
ybdR	-0.364889	3.33199	3.76997	0.372231	0.999943
ftsL	-0.102918	7.01402	0.916048	0.372275	0.999943
lon	0.140359	8.26751	0.912338	0.373185	0.999943
yjbR	-0.2	6.30469	0.911528	0.373385	0.999943
mfd	0.131241	6.03817	1.76145	0.373968	0.999943
cpxP	0.301101	9.10805	0.908566	0.374115	0.999943
yajR	-0.297456	6.28689	0.90778	0.374309	0.999943
yedA	-0.184973	5.18588	0.907558	0.374364	0.999943
bssR	0.701602	7.97267	0.907304	0.374426	0.999943
fdhE	0.274976	8.61302	0.904015	0.375241	0.999943
opgB	-0.138004	6.40584	0.902508	0.375615	0.999943
prkB	0.144373	5.84499	1.49087	0.375763	0.999943
metB	0.16195	5.53997	1.33895	0.376171	0.999943
paoD	0.271553	4.03809	1.94707	0.376918	0.999943
pqiC	0.161864	6.69758	0.897103	0.376962	0.999943
yobB	0.194568	4.90658	3.6794	0.37729	0.999943
hflC	0.169408	9.06917	0.895655	0.377324	0.999943
gcvP	0.0988142	8.94183	0.894467	0.377621	0.999943
yqfA	0.307551	6.25187	0.894059	0.377724	0.999943
thiF	0.305397	4.13988	0.892384	0.378144	0.999943
argE	0.219591	5.3435	0.890624	0.378587	0.999943
ynfN	0.542107	2.44214	1.89431	0.378894	0.999943
mltC	0.12119	6.16889	1.26059	0.379618	0.999943
fabF	-0.135695	10.0633	0.886083	0.379732	0.999943
thiL	-0.218053	7.02797	0.885548	0.379867	0.999943
tcyN	0.130899	5.91136	1.12572	0.380615	0.999943
smrA	0.187305	5.01099	1.43822	0.381124	0.999943
fliC	0.183751	5.10864	0.939621	0.381526	0.999943
glxK	-0.332088	3.50974	9.36425	0.382202	0.999943
sspB	-0.140496	8.73019	0.875301	0.382474	0.999943
ysgA	-0.235144	5.28829	0.873886	0.382836	0.999943
potC	0.189105	6.79883	0.872658	0.383151	0.999943
queC	-0.1064	6.66065	1.00251	0.383739	0.999943
yoaA	0.161731	5.68612	0.869066	0.384074	0.999943
ilvI	0.222318	4.71882	0.868006	0.384347	0.999943
lrp	0.212106	8.22415	0.867938	0.384365	0.999943
tusA	-0.227262	7.11452	0.867335	0.384521	0.999943
yqfB	0.108949	6.69611	0.867188	0.384558	0.999943
rutR	0.143432	5.72122	2.07389	0.384627	0.999943
ykgL	-0.193737	5.22138	0.866676	0.384691	0.999943
yqgA	0.394173	5.17743	0.866433	0.384753	0.999943
ybhF	0.192281	4.86689	2.42015	0.385032	0.999943
csgF	0.369035	3.23655	1.34766	0.385147	0.999943
feaR	0.312789	3.63572	3.45461	0.385718	0.999943
yjgH	-0.363356	3.27511	7.05695	0.385869	0.999943
yadI	0.279465	5.66565	0.862032	0.385893	0.999943
ypdI	0.320803	3.56562	1.63817	0.386515	0.999943
gshA	-0.0862996	7.73105	0.85894	0.386696	0.999943
napC	0.258604	5.44806	0.857586	0.387049	0.999943
yheS	0.12461	6.7817	0.857274	0.387131	0.999943
panB	0.128082	8.49796	0.855711	0.387539	0.999943
exoX	0.212333	5.48761	0.855279	0.387652	0.999943
btuD	-0.171434	5.24033	1.77528	0.387879	0.999943
ycgM	0.146387	5.72624	1.98461	0.388885	0.999943
arnF	-0.21236	5.16784	0.84858	0.389409	0.999943
glcF	0.443182	4.69445	0.846676	0.389911	0.999943
inaA	-0.123009	6.22065	1.22414	0.390922	0.999943
livK	0.337108	3.42022	1.88335	0.391562	0.999943
yqhG	-0.416018	2.93695	9.3169	0.392033	0.999943
fes	0.156236	7.21932	0.83617	0.3927	0.999943
wbbK	0.202051	7.81902	0.834792	0.393068	0.999943
yafS	0.134349	5.91861	1.47171	0.393992	0.999943
cobC	-0.224482	5.78618	0.830227	0.394292	0.999943
smpB	0.0868542	8.04963	0.82806	0.394875	0.999943
yecT	-0.324664	3.50194	1.56185	0.395362	0.999943
glcD	0.646321	6.00075	0.825718	0.395507	0.999943
ung	0.147557	5.8572	0.821202	0.39673	0.999943
yaeF	-0.246704	4.1993	3.36569	0.397155	0.999943
frmA	0.144758	6.32039	0.819448	0.397206	0.999943
fabR	-0.138322	7.93806	0.818628	0.397429	0.999943
murF	-0.103592	7.64051	0.816629	0.397974	0.999943
ispB	0.0839104	8.35744	0.815778	0.398207	0.999943
insI-1	0.240447	6.09291	0.814214	0.398634	0.999943
yjiX	-0.241216	4.21173	1.25376	0.398776	0.999943
mdtA	-0.276536	3.88188	3.85329	0.398939	0.999943
accB	-0.189899	9.34732	0.812419	0.399126	0.999943
ftsQ	-0.0797759	7.94823	0.811678	0.399329	0.999943
ydcV	-0.556245	2.31525	4.42633	0.399744	0.999943
ymgF	-0.212111	4.59292	2.0674	0.399834	0.999943
sapD	0.156234	5.83651	0.809825	0.399838	0.999943
yhjC	0.398375	3.01371	0.809259	0.399994	0.999943
ycgJ	-0.140196	5.74834	1.67715	0.400592	0.999943
yjiN	-0.27299	3.88253	1.30406	0.400655	0.999943
ybiV	-0.101947	6.60379	0.998034	0.400679	0.999943
lipB	-0.202301	7.092	0.806273	0.400817	0.999943
yfaZ	-0.144565	5.59334	1.13748	0.401816	0.999943
higA	0.233488	4.31562	3.99105	0.401973	0.999943
ymgD	-0.241946	6.72219	0.800929	0.402297	0.999943
ymgL	-0.425098	2.84287	1.53689	0.402562	0.999943
napA	0.407385	6.4719	0.797789	0.40317	0.999943
yiaU	-0.212691	4.50259	2.82242	0.404292	0.999943
wcaD	-0.53453	2.36617	2.16692	0.40449	0.999943
ydiH	0.128623	7.98162	0.792092	0.404764	0.999943
pntB	0.103517	6.43416	1.25064	0.405783	0.999943
racR	0.113774	7.7275	0.786029	0.406471	0.999943
trmI	0.207338	7.42744	0.785745	0.406551	0.999943
wecB	-0.160051	7.69098	0.785308	0.406675	0.999943
mrcB	-0.0963949	7.26465	0.784971	0.40677	0.999943
smg	0.224796	8.32196	0.784649	0.406861	0.999943
nuoC	-0.118693	9.13442	0.783359	0.407226	0.999943
fkpA	-0.0836713	9.20877	0.783239	0.40726	0.999943
tusC	-0.13723	6.60995	0.781964	0.407622	0.999943
glnH	-0.112962	8.81394	0.78068	0.407987	0.999943
ypfH	-0.133808	6.00344	0.780642	0.407998	0.999943
agaR	0.201099	6.62151	0.778968	0.408474	0.999943
thiB	0.155296	5.28833	1.60868	0.408736	0.999943
lolE	0.146688	7.20503	0.774235	0.409826	0.999943
codB	0.113487	7.27954	0.772832	0.410228	0.999943
fdnH	0.388944	2.99227	1.45637	0.410737	0.999943
ppc	0.226168	7.86892	0.770372	0.410935	0.999943
yaiL	0.169019	9.03662	0.7693	0.411243	0.999943
afuC	0.35399	3.20812	7.29633	0.411375	0.999943
ygdB	0.322837	3.42355	6.99067	0.412074	0.999943
dnaK	0.275845	9.25073	0.766116	0.412162	0.999943
topAI	0.210646	4.58201	1.01449	0.412308	0.999943
matP	0.167323	5.1682	1.0247	0.412631	0.999943
argG	0.124559	6.0905	1.02961	0.413189	0.999943
sucA	-0.191653	10.3437	0.761817	0.413409	0.999943
kdsB	0.111754	7.84178	0.761469	0.41351	0.999943
ypfN	-0.130234	6.24394	0.761073	0.413625	0.999943
rhlE	0.19925	7.39785	0.759684	0.414029	0.999943
sdhD	-0.159211	9.7339	0.759301	0.414141	0.999943
modE	0.117025	6.05498	1.23118	0.414417	0.999943
bglX	0.130352	5.85057	0.857226	0.415117	0.999943
yjjI	0.454885	5.82477	0.75355	0.415822	0.999943
yjeM	-0.228546	4.26286	2.78039	0.416153	0.999943
damX	-0.102441	8.74054	0.751571	0.416404	0.999943
yhaH	-0.185906	6.92295	0.75155	0.41641	0.999943
rppH	0.102174	8.343	0.751424	0.416447	0.999943
yijE	-0.183707	4.80848	1.38841	0.417234	0.999943
yagJ	0.211557	5.27925	0.746555	0.417884	0.999943
gltD	-0.345613	7.25123	0.746122	0.418012	0.999943
arfB	-0.128042	5.94756	1.19892	0.418397	0.999943
napD	0.407942	6.12764	0.744179	0.418588	0.999943
lpxH	0.0952402	6.55489	0.836566	0.419869	0.999943
glpE	-0.0836311	8.29052	0.739156	0.420083	0.999943
yhhM	0.131826	5.87891	0.738449	0.420294	0.999943
arfA	-0.120479	5.89407	1.12402	0.420512	0.999943
uraA	-0.161249	5.22417	1.66641	0.420739	0.999943
fimA	0.100455	13.7015	0.734234	0.421556	0.999943
sohB	0.0798322	7.33282	0.734009	0.421624	0.999943
bcsE	-0.178609	6.73297	0.732629	0.422038	0.999943
ydeJ	-0.29853	3.55146	1.87136	0.423143	0.999943
ybaN	-0.0828697	7.28877	0.728482	0.423289	0.999943
psd	0.114832	7.56023	0.728211	0.423371	0.999943
yciI	0.296066	7.27328	0.725665	0.424142	0.999943
ymgA	0.226052	5.91546	0.724093	0.42462	0.999943
recF	-0.255644	6.85818	0.72381	0.424706	0.999943
rpsU	-0.307954	11.894	0.721179	0.425507	0.999943
wbbJ	0.183728	8.26304	0.718985	0.426177	0.999943
ybcI	-0.199681	4.63468	2.01179	0.426438	0.999943
narI	-0.372501	3.01135	1.12965	0.426896	0.999943
yibI	-0.402549	2.84105	1.25776	0.426907	0.999943
yfeX	0.198011	7.89292	0.715944	0.427109	0.999943
accC	-0.14459	9.51494	0.715552	0.427229	0.999943
pyrL	-0.403458	2.83757	3.16793	0.427542	0.999943
pdeI	-0.130796	5.7328	1.23041	0.427648	0.999943
ypeA	0.127444	5.95242	0.713444	0.427878	0.999943
iscU	0.293574	8.85897	0.712637	0.428126	0.999943
ykfM	-0.506141	2.37387	4.47457	0.428478	0.999943
ychS	-0.245365	4.01244	1.74678	0.428581	0.999943
gltA	0.13453	10.0073	0.709536	0.429084	0.999943
dtpA	0.0932601	6.82966	0.708857	0.429294	0.999943
npr	-0.138575	7.14794	0.708429	0.429426	0.999943
insC-6	-0.337005	3.23601	0.775644	0.429926	0.999943
waaJ	0.0992821	6.38569	0.743468	0.430444	0.999943
yegD	0.272888	4.8358	0.703953	0.430817	0.999943
ccmG	0.184927	4.70237	1.78342	0.431289	0.999943
dapE	-0.106344	6.45548	0.702258	0.431346	0.999943
hflX	0.108818	8.43064	0.700441	0.431913	0.999943
aroG	0.191202	7.54235	0.699687	0.432149	0.999943
yafT	-0.2383	4.22929	0.69841	0.43255	0.999943
ysaA	0.271846	6.03374	0.697928	0.432701	0.999943
yaaJ	0.356239	5.09731	0.697726	0.432764	0.999943
ahpC	-0.0938297	11.4752	0.697266	0.432909	0.999943
yedD	0.0744783	7.59248	0.696402	0.43318	0.999943
ycjF	0.259412	4.23942	0.696327	0.433203	0.999943
tonB	0.111222	8.66522	0.692919	0.434278	0.999943
dnaN	-0.164232	7.68162	0.69267	0.434356	0.999943
rna	0.0906564	6.9203	0.692148	0.434521	0.999943
cysC	0.23908	6.91692	0.691982	0.434573	0.999943
cysH	0.168096	8.05257	0.689313	0.435419	0.999943
yfbS	0.348338	5.29593	0.688717	0.435608	0.999943
proS	-0.13688	9.21365	0.68833	0.435731	0.999943
argD	0.135712	5.7029	0.788844	0.437125	0.999943
glnA	-0.101366	10.8558	0.683438	0.437289	0.999943
gldA	0.433114	5.03187	0.682794	0.437495	0.999943
xylB	-0.235942	4.05215	1.95753	0.437997	0.999943
ybgU	0.248429	4.81297	0.678584	0.438845	0.999943
bcr	-0.0937134	6.70208	0.677797	0.439098	0.999943
insE-3	-0.175609	4.89043	1.3437	0.439194	0.999943
ettA	0.15491	8.79024	0.677482	0.4392	0.999943
rpsT	-0.214608	13.0397	0.676991	0.439358	0.999943
citE	0.564192	2.12888	2.1874	0.439383	0.999943
ftsB	-0.114917	7.91935	0.674941	0.440019	0.999943
mntP	-0.212845	4.39572	0.794621	0.440105	0.999943
degP	-0.0992874	7.74952	0.674675	0.440105	0.999943
cutA	0.126451	5.83415	1.35232	0.440863	0.999943
bioP	-0.160372	7.60254	0.670609	0.441422	0.999943
yohF	-0.294554	3.48505	1.64716	0.441808	0.999943
yebF	-0.0739216	8.02143	0.666193	0.44286	0.999943
ytfL	-0.19325	5.77326	0.664478	0.443421	0.999943
lacY	-0.266935	3.71883	5.7336	0.444165	0.999943
folC	-0.202527	6.80094	0.661638	0.444352	0.999943
abrB	0.324801	5.64401	0.661058	0.444543	0.999943
yhhS	0.212629	6.01329	0.660611	0.44469	0.999943
fruB	0.530607	2.21719	7.45941	0.445032	0.999943
galF	-0.224548	9.09295	0.658137	0.445505	0.999943
yjeI	0.114361	8.06663	0.6575	0.445715	0.999943
yajQ	0.164802	9.79572	0.655837	0.446265	0.999943
yfdH	-0.141364	5.39202	0.781414	0.446299	0.999943
glmM	0.0982887	8.0997	0.65557	0.446353	0.999943
fusA	0.100145	12.7367	0.655528	0.446367	0.999943
ratA	-0.0904408	7.70827	0.65534	0.446429	0.999943
cysG	0.111496	6.17317	0.671163	0.446654	0.999943
dapA	0.0893473	9.12789	0.654249	0.446791	0.999943
ycgN	0.116513	5.95332	0.957899	0.447345	0.999943
pyrF	0.156805	6.60081	0.65245	0.447388	0.999943
rcbA	0.522549	2.23454	4.86075	0.447439	0.999943
fhuA	0.0913091	9.13386	0.652126	0.447496	0.999943
gspO	-0.178699	4.93937	0.651792	0.447607	0.999943
rsxB	-0.205136	5.64371	0.651714	0.447633	0.999943
nepI	-0.128738	5.51775	0.935701	0.447757	0.999943
rfe	-0.096635	7.79375	0.65114	0.447824	0.999943
lpd	0.174753	11.7197	0.650759	0.447951	0.999943
glcE	0.516498	4.43263	0.64945	0.448387	0.999943
rpiB	0.367047	2.939	1.82418	0.448458	0.999943
cyoC	0.154529	10.4945	0.64833	0.448761	0.999943
lafU	0.300519	3.39705	1.48622	0.448958	0.999943
yafW	-0.1776	4.79336	2.33949	0.44913	0.999943
dld	-0.101689	6.23051	1.14649	0.450054	0.999943
pdeA	-0.197721	4.48356	2.34777	0.450098	0.999943
yebC	0.160396	8.74364	0.644225	0.450137	0.999943
tolC	-0.0769373	8.32317	0.644032	0.450202	0.999943
infA	-0.170931	11.7184	0.643191	0.450484	0.999943
yihI	0.124195	7.95381	0.643037	0.450536	0.999943
yhdX	-0.365065	2.94007	1.18694	0.450664	0.999943
uspD	-0.294209	6.15722	0.642627	0.450674	0.999943
dsrB	-0.104336	7.49704	0.641937	0.450906	0.999943
cydD	0.148047	5.31569	1.78306	0.451403	0.999943
chaC	-0.164755	5.56035	0.639275	0.451805	0.999943
yeiS	0.176121	4.83624	1.73704	0.451834	0.999943
rseP	-0.0814569	8.67365	0.637469	0.452416	0.999943
mdfA	-0.159125	5.56136	0.636491	0.452748	0.999943
pdxY	-0.151482	6.99382	0.635252	0.453169	0.999943
secF	0.0906953	8.47727	0.631763	0.454358	0.999943
uspE	0.243182	7.24754	0.630733	0.454709	0.999943
yghX	-0.381543	2.82407	2.67042	0.455074	0.999943
dapF	0.153968	7.35107	0.62955	0.455114	0.999943
lspA	-0.0781599	7.70662	0.629387	0.45517	0.999943
ykgE	0.250508	3.81273	2.64443	0.455235	0.999943
bacA	0.0874795	6.77162	0.628644	0.455425	0.999943
wcaB	-0.537107	2.15232	2.86118	0.455998	0.999943
ftsW	-0.0954804	7.43248	0.626586	0.456132	0.999943
cmk	-0.119332	7.40194	0.62637	0.456206	0.999943
sbcC	0.138521	5.66904	0.626139	0.456285	0.999943
cyoD	0.154722	10.4247	0.624807	0.456744	0.999943
gpr	-0.194056	4.49793	2.91549	0.457733	0.999943
dppC	0.167999	5.91336	0.621082	0.458031	0.999943
ynaE	0.125399	6.48169	0.618283	0.459002	0.999943
atoD	-0.589439	1.98622	10.5307	0.459334	0.999943
rpmC	0.100653	11.5876	0.616151	0.459744	0.999943
hydN	-0.35103	2.98777	3.57278	0.459765	0.999943
yfiC	0.129114	5.49157	0.923263	0.459837	0.999943
mtr	-0.177858	4.66203	2.90349	0.459878	0.999943
ddpB	-0.384789	2.7797	1.11217	0.460148	0.999943
yacL	0.087691	7.8239	0.614706	0.460248	0.999943
metH	0.155007	5.51334	0.613769	0.460576	0.999943
nuoB	-0.0765421	9.40832	0.612701	0.46095	0.999943
pheA	0.149711	6.05912	0.609905	0.461931	0.999943
yqgF	0.099169	6.40865	0.826888	0.462695	0.999943
glnE	0.111286	6.00025	1.25801	0.462801	0.999943
thiS	0.270269	3.57778	0.895128	0.462936	0.999943
dhaR	0.237311	4.00732	0.606585	0.463101	0.999943
ybdJ	-0.0950367	6.4883	0.720928	0.463136	0.999943
fepA	0.166665	8.28244	0.60506	0.46364	0.999943
rpoA	0.111613	12.7535	0.604126	0.46397	0.999943
ridA	0.13961	9.58539	0.603408	0.464225	0.999943
qseG	-0.132265	5.47365	1.45361	0.464994	0.999943
yifN	0.187485	5.4575	0.600141	0.465386	0.999943
add	0.343069	5.60275	0.599744	0.465528	0.999943
hisI	-0.11508	5.81948	1.29249	0.466093	0.999943
yigF	0.229199	3.97535	3.75429	0.466243	0.999943
nuoM	-0.169539	8.79464	0.597719	0.46625	0.999943
seqA	-0.0733396	8.07253	0.596584	0.466656	0.999943
ilvH	0.200857	4.36257	0.793099	0.46719	0.999943
rpsG	0.114531	12.0595	0.594373	0.467449	0.999943
shiA	-0.115146	5.81735	0.593335	0.467822	0.999943
yegH	-0.128415	5.44475	1.35175	0.46791	0.999943
apaH	-0.182247	6.92658	0.592574	0.468096	0.999943
ebgR	0.199496	5.46166	0.590977	0.468671	0.999943
folK	0.0999165	6.7067	0.590593	0.46881	0.999943
cdd	-0.136848	5.39879	0.589591	0.469172	0.999943
evgA	0.22543	7.37449	0.588287	0.469644	0.999943
nuoL	-0.154634	9.06447	0.585863	0.470523	0.999943
manX	-0.180571	8.19446	0.58559	0.470622	0.999943
ychN	0.099078	7.89039	0.584115	0.471158	0.999943
yidR	-0.106351	5.96286	1.05326	0.472056	0.999943
umpH	0.0686281	7.24525	0.613171	0.472568	0.999943
lacA	-0.227982	3.95197	3.26172	0.472928	0.999943
ydbJ	-0.118163	7.09005	0.579181	0.472961	0.999943
pptA	0.251286	3.70309	1.45891	0.473279	0.999943
ygbI	0.132308	5.40743	1.69513	0.473671	0.999943
yggI	-0.191148	4.43856	1.67322	0.473817	0.999943
dhaM	-0.0954524	7.73986	0.576031	0.474119	0.999943
ftsN	-0.079107	7.43182	0.575203	0.474424	0.999943
iscS	0.273825	9.64807	0.575161	0.47444	0.999943
ypfJ	-0.139123	7.5667	0.573185	0.475169	0.999943
thiP	0.160068	4.83105	1.38699	0.475362	0.999943
yhdY	-0.52784	2.1061	2.66429	0.475477	0.999943
yfjF	-0.115333	7.67534	0.572194	0.475536	0.999943
pyrD	-0.10856	6.89488	0.572012	0.475603	0.999943
purA	0.0818526	11.1807	0.569709	0.476457	0.999943
insJ	-0.248932	5.13437	0.569424	0.476564	0.999943
sanA	-0.15614	4.83354	1.101	0.476806	0.999943
ybbC	0.207811	4.91488	0.567323	0.477345	0.999943
sodC	-0.173161	4.65646	2.78207	0.477586	0.999943
acs	-0.197112	4.3273	2.5363	0.477915	0.999943
menH	-0.116485	5.85639	0.615521	0.478082	0.999943
metR	-0.142176	5.17826	1.02052	0.478666	0.999943
ychH	0.225333	7.92533	0.5636	0.478737	0.999943
coaE	-0.0764671	6.91411	0.560577	0.479873	0.999943
yahB	0.199801	5.43054	0.560472	0.479912	0.999943
cirA	0.405934	8.93799	0.559577	0.480249	0.999943
cyoE	0.146621	10.8993	0.558282	0.480738	0.999943
hypA	0.486494	3.37726	0.558037	0.48083	0.999943
iaaA	0.295019	7.68749	0.557682	0.480964	0.999943
uspF	0.296627	5.66845	0.557436	0.481057	0.999943
bax	0.150031	7.28736	0.557093	0.481187	0.999943
csiR	-0.183924	4.83376	0.554065	0.482335	0.999943
chbG	0.228213	3.896	2.33739	0.482701	0.999943
yhbQ	0.158238	6.20887	0.550946	0.483523	0.999943
proY	-0.0888028	6.82996	0.549434	0.4841	0.999943
rzpR	-0.319654	3.06846	1.16639	0.484181	0.999943
yhcH	-0.213375	4.07666	2.47754	0.484619	0.999943
ybhM	-0.309764	3.13938	3.89698	0.484811	0.999943
aqpZ	-0.338855	4.10552	0.546869	0.485083	0.999943
aphA	0.191769	4.94336	0.546808	0.485107	0.999943
ycbJ	0.475497	5.80903	0.546726	0.485138	0.999943
yiiX	-0.140644	5.23345	1.61047	0.485155	0.999943
mlaF	-0.110429	8.0505	0.545517	0.485602	0.999943
gapA	0.137278	11.8564	0.544354	0.48605	0.999943
nfrB	-0.292324	3.26181	2.2809	0.486999	0.999943
yqiD	0.348047	6.1574	0.541521	0.487144	0.999943
queF	0.0925501	6.85553	0.541329	0.487218	0.999943
dgoT	0.304161	3.16631	2.86421	0.487307	0.999943
pstB	-0.252395	6.34991	0.539906	0.48777	0.999943
cytR	0.0796556	6.79915	0.734414	0.487952	0.999943
ybaQ	0.189944	7.28349	0.538564	0.488291	0.999943
udk	-0.233598	6.83346	0.538033	0.488497	0.999943
mhpE	0.198552	10.4595	0.536804	0.488975	0.999943
insC-2	-0.297247	3.2178	1.23568	0.48899	0.999943
aes	-0.23865	3.74404	3.59251	0.489191	0.999943
ydcU	-0.381416	2.66259	7.14944	0.489256	0.999943
deoC	-0.138891	6.08157	0.534659	0.489812	0.999943
ruvB	0.104638	6.0142	1.14729	0.489815	0.999943
nuoH	-0.154583	8.95527	0.531438	0.491074	0.999943
uxaC	0.262698	3.49126	1.25974	0.491147	0.999943
ybeZ	0.0908526	7.45862	0.531218	0.49116	0.999943
glpD	0.102022	11.4033	0.530458	0.491459	0.999943
pssA	-0.0828525	7.32464	0.530304	0.491519	0.999943
glpR	0.0828529	7.66075	0.52997	0.491651	0.999943
mukF	0.0736206	6.80748	0.632255	0.492107	0.999943
ybjS	-0.0967905	6.36308	0.528614	0.492185	0.999943
hicB	-0.188592	4.32111	1.98424	0.492574	0.999943
yqhC	0.22524	3.8686	1.95701	0.492907	0.999943
nfo	0.107749	5.81864	1.08649	0.493142	0.999943
pstA	-0.211567	5.69092	0.525339	0.493479	0.999943
yibT	0.177519	5.89189	0.525036	0.493599	0.999943
ybaP	-0.148269	6.33578	0.524686	0.493738	0.999943
ybbD	0.240418	3.69461	1.20523	0.493806	0.999943
ymjC	-0.417199	2.45634	2.18788	0.494501	0.999943
yfdX	0.485	2.17506	5.48755	0.494537	0.999943
yihG	-0.225077	5.79335	0.522325	0.494676	0.999943
pck	0.171586	8.51612	0.520981	0.495211	0.999943
mlaA	-0.0731731	7.17019	0.520952	0.495223	0.999943
ykfI	-0.162058	4.76318	2.17833	0.495372	0.999943
glnL	-0.0875379	7.49799	0.519952	0.495622	0.999943
yneE	-0.164922	4.6044	1.74613	0.496429	0.999943
nuoE	-0.10073	9.1902	0.517348	0.496664	0.999943
pdeB	-0.133372	5.10749	1.09882	0.496702	0.999943
acpS	-0.0911816	6.47152	0.515418	0.497439	0.999943
glmS	0.0715789	9.8594	0.514988	0.497612	0.999943
alsE	0.357496	2.753	4.63921	0.497985	0.999943
tig	0.0762348	10.5632	0.513331	0.498279	0.999943
wbbH	0.16624	7.98836	0.512924	0.498443	0.999943
yjcO	0.11453	5.96281	0.512909	0.49845	0.999943
tamA	0.115806	5.81566	0.637261	0.498535	0.999943
ybeD	-0.102471	8.39605	0.51236	0.498671	0.999943
mlaD	-0.0865254	7.20488	0.512261	0.498711	0.999943
zupT	0.178359	6.43172	0.512125	0.498766	0.999943
nohD	-0.393725	2.54634	1.77878	0.499361	0.999943
dauA	-0.125427	5.41308	1.04361	0.499392	0.999943
yabQ	-0.0698843	7.83447	0.509663	0.499763	0.999943
yoeA	0.24979	5.92619	0.509516	0.499822	0.999943
ygdT	-0.427497	2.38456	2.16284	0.499911	0.999943
ansB	0.474713	5.97354	0.509275	0.49992	0.999943
pgm	-0.0686683	8.06055	0.509228	0.499939	0.999943
aroL	0.0829385	6.72871	0.598033	0.499983	0.999943
yebG	0.0853693	8.56899	0.50904	0.500016	0.999943
rapA	0.163667	7.29098	0.508237	0.500342	0.999943
mutL	0.115073	6.96092	0.506999	0.500846	0.999943
yafN	-0.0962497	5.95272	0.703676	0.500875	0.999943
fldB	0.0851944	8.01021	0.506845	0.500908	0.999943
rlmF	0.104177	5.79179	0.866084	0.501025	0.999943
rarA	-0.140211	6.71436	0.506233	0.501158	0.999943
accA	-0.0909169	9.24758	0.506095	0.501214	0.999943
yohC	-0.343713	2.81847	1.16357	0.501527	0.999943
pbpC	-0.214123	3.95521	1.85073	0.501746	0.999943
ydiE	0.102163	5.94453	0.706622	0.501922	0.999943
lpoA	0.0929056	6.3489	0.707354	0.502319	0.999943
ybbP	0.197951	4.15365	2.72351	0.502405	0.999943
hcxA	0.168402	4.55688	2.47391	0.502621	0.999943
yejE	-0.197969	4.14804	3.33995	0.50291	0.999943
fumA	0.088749	7.45241	0.500546	0.503486	0.999943
tufA	0.0807263	13.3034	0.50036	0.503563	0.999943
slyX	-0.0968966	6.78293	0.499607	0.503873	0.999943
dgt	0.190405	5.08375	0.49787	0.504589	0.999943
artP	-0.136002	6.65523	0.49749	0.504746	0.999943
yoaH	0.117339	6.81315	0.494211	0.506105	0.999943
crp	0.131131	9.26276	0.493616	0.506352	0.999943
yfdK	0.342499	2.79533	1.61074	0.507427	0.999943
rcsD	-0.0743524	6.67645	0.594334	0.50743	0.999943
maa	0.0843984	7.36522	0.490868	0.507496	0.999943
ubiJ	0.0981326	7.69897	0.490541	0.507633	0.999943
yccX	-0.126802	5.21327	0.880363	0.507678	0.999943
kdsD	0.0717813	7.01883	0.546945	0.507717	0.999943
ecnA	-0.190264	5.69629	0.489293	0.508155	0.999943
insC-3	-0.283324	3.22526	0.918443	0.508293	0.999943
zapA	0.0693377	9.21543	0.488775	0.508372	0.999943
fepE	-0.213862	3.91598	0.62856	0.508794	0.999943
pmbA	0.0694184	7.18111	0.487667	0.508836	0.999943
rpsM	0.106311	12.2754	0.486947	0.509138	0.999943
rbsK	-0.142017	7.08582	0.486782	0.509208	0.999943
fhlA	-0.215182	3.88074	1.94189	0.509213	0.999943
yqhD	0.137151	5.1686	0.786831	0.509233	0.999943
sgcQ	0.152983	5.27148	0.486719	0.509234	0.999943
yghU	-0.116396	5.46268	1.32195	0.509258	0.999943
aroH	-0.0958118	5.90595	0.553983	0.509463	0.999943
yeeS	0.16527	5.92757	0.486022	0.509527	0.999943
ruvC	0.154165	8.46151	0.485921	0.50957	0.999943
yraP	0.0728007	6.87523	0.585511	0.509613	0.999943
yohJ	0.223778	4.24648	0.485485	0.509753	0.999943
yddW	-0.212536	3.91738	4.20362	0.509803	0.999943
kefG	0.178394	6.28224	0.484837	0.510026	0.999943
rimP	-0.148364	9.57553	0.484264	0.510268	0.999943
yjeH	0.170949	4.52479	0.719174	0.510448	0.999943
rsmA	-0.156786	8.59803	0.481982	0.511232	0.999943
ompR	0.0704293	7.10352	0.530972	0.511415	0.999943
secD	0.0948035	8.72501	0.481017	0.511641	0.999943
insH-8	-0.391142	2.50103	3.063	0.51238	0.999943
metL	0.0913926	6.18206	0.915358	0.512491	0.999943
rplW	0.122264	12.3362	0.478856	0.512558	0.999943
tsf	0.0754996	11.1447	0.478547	0.51269	0.999943
nuoF	-0.112497	9.08685	0.478342	0.512777	0.999943
yfjD	-0.0923018	6.16257	0.625198	0.513038	0.999943
ygeX	-0.318056	2.92849	3.87175	0.513472	0.999943
ascF	0.248992	3.49184	1.03144	0.513792	0.999943
ytiD	0.303972	5.47913	0.475916	0.513812	0.999943
kdpA	-0.398817	4.7324	0.475482	0.513998	0.999943
cspH	-0.118336	5.30666	0.643442	0.514615	0.999943
yciV	0.120845	5.87784	0.473726	0.51475	0.999943
mdtB	-0.220419	3.79861	2.31917	0.514829	0.999943
hokC	-1.03206	2.01354	0.473063	0.515034	0.999943
murG	-0.0769415	7.68027	0.472026	0.51548	0.999943
dcp	0.108594	5.69061	1.18142	0.515704	0.999943
fadJ	0.188188	4.18208	2.92883	0.515943	0.999943
ybhR	0.222335	3.76118	4.21714	0.516237	0.999943
aaeA	-0.236733	3.6013	0.911862	0.516281	0.999943
cueR	-0.126694	6.43248	0.469781	0.516447	0.999943
dcuA	0.126537	6.75345	0.469753	0.516459	0.999943
sdhB	-0.122923	10.3471	0.469743	0.516463	0.999943
purU	0.0880785	7.85135	0.469158	0.516716	0.999943
yaiI	-0.0849676	6.33275	0.600967	0.516982	0.999943
pepD	0.0641595	10.0986	0.467866	0.517275	0.999943
ftsA	-0.0631374	8.14545	0.467775	0.517314	0.999943
pdeR	-0.191738	4.12796	3.41478	0.517976	0.999943
ypjD	-0.132164	5.07086	1.573	0.518092	0.999943
potI	-0.225886	3.70278	1.49616	0.519069	0.999943
yehR	-0.212415	3.86524	2.06423	0.519402	0.999943
wbbL	0.143786	7.33389	0.462338	0.519679	0.999943
insH-1	-0.375376	2.54623	3.82337	0.519712	0.999943
ymgG	-0.189659	5.91373	0.461367	0.520103	0.999943
fhuE	0.137837	5.60078	0.461011	0.520259	0.999943
ppnN	0.11445	6.92112	0.460345	0.520551	0.999943
ghxP	-0.110959	8.0994	0.459754	0.52081	0.999943
ybjC	0.135822	5.06424	1.25159	0.520889	0.999943
fadA	0.147889	4.74507	0.738658	0.521988	0.999943
mepA	0.0773325	6.66732	0.45625	0.522351	0.999943
tsaD	-0.133363	7.06071	0.455119	0.522851	0.999943
recD	0.122395	5.73316	0.45503	0.52289	0.999943
yceI	0.144722	4.72609	1.00731	0.523129	0.999943
ptsP	0.0602872	7.33216	0.466406	0.523553	0.999943
ppiD	0.0612959	8.54275	0.45352	0.523558	0.999943
holE	0.0911211	6.17953	0.90664	0.523597	0.999943
yjjX	0.106949	5.81988	0.96341	0.523804	0.999943
clpB	0.200117	7.19142	0.452729	0.523909	0.999943
yebW	-0.177534	4.25843	1.23426	0.523938	0.999943
yihF	0.231516	3.61723	1.83442	0.524035	0.999943
ygdD	-0.103528	5.904	0.523039	0.52405	0.999943
waaH	-0.193053	4.08494	1.47399	0.52417	0.999943
nupG	-0.172816	4.54841	0.451797	0.524323	0.999943
ydiV	-0.134071	4.9823	0.753611	0.524491	0.999943
ygfS	0.309688	2.92372	2.11268	0.524947	0.999943
proA	0.0788862	8.14852	0.449909	0.525163	0.999943
aaaD	-0.360193	2.60233	2.71326	0.525365	0.999943
ubiB	0.113147	6.97946	0.449348	0.525413	0.999943
gor	0.135765	7.46334	0.448988	0.525574	0.999943
alsR	0.105843	5.78899	0.995492	0.525701	0.999943
ydcK	-0.263412	3.28909	0.706839	0.525717	0.999943
xthA	0.125207	7.17024	0.447731	0.526136	0.999943
phoU	-0.25047	6.48865	0.447207	0.52637	0.999943
bdcA	0.227415	3.64119	2.40758	0.526613	0.999943
mdtD	-0.279765	3.14899	3.31866	0.526741	0.999943
marC	0.137694	4.97003	1.70118	0.527006	0.999943
parE	-0.0923108	7.37061	0.444793	0.527453	0.999943
yraN	0.0862573	6.29349	0.701907	0.528098	0.999943
livH	0.338055	2.71729	3.08632	0.528278	0.999943
dgcM	-0.219646	3.72052	4.27388	0.528455	0.999943
ydcL	-0.0998383	5.82584	0.747127	0.528857	0.999943
yghQ	-0.204245	3.90014	3.2293	0.528894	0.999943
pncA	0.087046	6.70975	0.440436	0.529419	0.999943
dgcN	-0.146678	4.84044	1.36903	0.529514	0.999943
ybhK	0.111795	5.59909	1.013	0.529646	0.999943
ecpR	0.216382	3.74454	3.13708	0.530316	0.999943
rnb	0.0691938	7.90342	0.438285	0.530395	0.999943
yabI	-0.0831821	6.27413	0.692241	0.530422	0.999943
dsbB	0.075067	6.98467	0.437305	0.530841	0.999943
dnaT	-0.123869	6.54122	0.436119	0.531381	0.999943
yciT	0.131232	6.10832	0.436118	0.531382	0.999943
tauA	0.237952	3.49134	1.09745	0.532811	0.999943
ubiX	-0.17127	6.91452	0.432881	0.532862	0.999943
yhcG	-0.226644	3.60847	1.09474	0.53321	0.999943
gabP	-0.420564	2.26576	9.04653	0.533404	0.999943
ynjD	-0.21592	3.73192	2.75651	0.533544	0.999943
yfcF	-0.174895	4.22187	1.03197	0.533587	0.999943
ypjK	-0.523972	1.89163	9.51943	0.5346	0.999943
glk	-0.0842639	6.50625	0.542265	0.534938	0.999943
rlmA	0.177871	6.29975	0.42782	0.535193	0.999943
aceB	0.196289	3.96919	0.769707	0.535301	0.999943
yedS	-0.231466	3.54121	0.866782	0.535661	0.999943
aroK	-0.127101	9.60749	0.426336	0.535881	0.999943
yfdG	-0.123239	7.53755	0.425675	0.536187	0.999943
folM	0.112814	5.43349	1.06975	0.536232	0.999943
insH-3	-0.362707	2.5343	2.8422	0.536316	0.999943
actP	-0.250705	3.34923	4.06447	0.536327	0.999943
dtpC	-0.237285	3.48166	3.57682	0.536544	0.999943
yniB	0.0933416	6.206	0.424831	0.53658	0.999943
dacA	-0.123562	7.4566	0.424714	0.536634	0.999943
yaaI	-0.415522	2.27091	2.19063	0.53675	0.999943
sspA	-0.0960612	9.36236	0.423964	0.536983	0.999943
ccp	-0.277649	3.66063	0.423956	0.536987	0.999943
yacG	0.10727	7.70382	0.423676	0.537117	0.999943
cyoB	0.119886	10.6488	0.422864	0.537496	0.999943
yjiA	0.128325	5.93306	0.422637	0.537602	0.999943
cdh	0.11692	5.44805	0.916518	0.537824	0.999943
cyaA	0.108647	7.9216	0.421606	0.538084	0.999943
waaB	0.0794637	6.57957	0.421506	0.53813	0.999943
allE	0.163653	4.43676	2.02596	0.539026	0.999943
uhpC	0.172188	4.26782	2.63957	0.539177	0.999943
wzxE	-0.0891581	6.64026	0.417422	0.540047	0.999943
creB	0.0922835	6.03612	0.444474	0.540328	0.999943
ygfZ	0.0977009	7.229	0.415163	0.541113	0.999943
nrdG	0.15955	6.18435	0.415144	0.541122	0.999943
icdC	0.0969347	10.5476	0.414548	0.541404	0.999943
adeP	-0.0879636	9.16879	0.413019	0.542129	0.999943
uhpT	0.328304	5.29531	0.411574	0.542816	0.999943
hcxB	0.0923611	6.0019	0.446898	0.54283	0.999943
yafV	0.178441	5.44352	0.410942	0.543116	0.999943
lptB	0.0830147	7.66886	0.41064	0.54326	0.999943
insH-11	-0.354271	2.54416	4.6416	0.5439	0.999943
nhaR	0.0934687	6.15234	0.409149	0.543972	0.999943
ymgC	0.178928	5.13909	0.407714	0.544658	0.999943
yhcE	-0.200481	3.84876	3.25314	0.544854	0.999943
hokA	-0.163203	4.48413	0.407129	0.544939	0.999943
ytjC	0.0717748	6.5769	0.541613	0.545303	0.999943
argI	0.295736	2.915	4.25011	0.545572	0.999943
ybiT	0.0726782	7.22923	0.402983	0.546934	0.999943
yecF	-0.155232	7.0575	0.40149	0.547657	0.999943
yfgI	-0.258188	4.56308	0.400539	0.548117	0.999943
phoA	-0.23359	4.90941	0.400388	0.548191	0.999943
rutA	-0.336514	2.6234	1.22325	0.548379	0.999943
yddE	0.115791	5.33441	1.34838	0.548388	0.999943
nfi	0.091462	6.81904	0.399521	0.548612	0.999943
ynfB	-0.0998369	5.56913	0.399492	0.548626	0.999943
opgG	-0.076545	7.71826	0.399059	0.548837	0.999943
insI-2	0.515415	2.07757	0.398779	0.548973	0.999943
dmsB	0.364213	3.79215	0.398412	0.549151	0.999943
modB	0.140009	4.7794	1.28329	0.549284	0.999943
baeR	0.116465	5.32	1.22029	0.549509	0.999943
ppdB	0.279086	3.01533	2.29002	0.550532	0.999943
mhpF	0.177764	10.1272	0.395168	0.550737	0.999943
ygjQ	-0.403639	2.26045	4.23948	0.550887	0.999943
acrB	0.059186	8.10554	0.394427	0.5511	0.999943
dcm	0.124297	5.93756	0.393759	0.551428	0.999943
ybeF	-0.177455	4.10556	2.36308	0.551611	0.999943
yohK	0.220149	3.96723	0.392576	0.552009	0.999943
fdx	0.210155	8.97881	0.392149	0.552219	0.999943
mscM	0.117823	5.45985	0.39173	0.552426	0.999943
mhpD	0.185783	10.3006	0.391334	0.552621	0.999943
yahN	0.228375	3.46929	0.567794	0.552712	0.999943
yidX	-0.110403	5.27049	0.552395	0.55338	0.999943
bioD	0.0883619	7.56207	0.388905	0.553823	0.999943
paaK	-0.207391	3.70528	1.8674	0.554379	0.999943
pdeC	-0.207348	3.69988	2.07151	0.554514	0.999943
yifL	0.14465	7.83339	0.38737	0.554584	0.999943
rffM	-0.0808948	6.47224	0.456257	0.554695	0.999943
dsbC	0.0575519	7.33454	0.386552	0.554991	0.999943
dnaG	-0.187525	8.07042	0.384969	0.55578	0.999943
nuoG	-0.129869	9.31263	0.383859	0.556335	0.999943
yhbS	0.229373	7.74715	0.380665	0.557937	0.999943
yhcA	0.358609	2.44508	1.531	0.558182	0.999943
argA	0.171631	4.17994	1.4968	0.558477	0.999943
ygiD	0.149856	4.53514	0.857692	0.558947	0.999943
clpA	0.225758	8.68202	0.378236	0.559162	0.999943
wcaK	-0.327374	2.62491	2.35168	0.559198	0.999943
rpsD	0.0886487	12.3866	0.377049	0.559762	0.999943
yjeO	0.120799	5.14172	1.09252	0.559778	0.999943
trmA	0.0872038	7.55321	0.376388	0.560097	0.999943
ccmF	0.146329	4.51477	1.37111	0.560216	0.999943
ylcJ	0.59825	1.61574	6.42178	0.560443	0.999943
csiE	-0.218526	3.53384	2.78826	0.560572	0.999943
dgcQ	-0.139597	4.65609	1.7002	0.560591	0.999943
secM	-0.059995	8.50376	0.375099	0.560752	0.999943
yfjQ	-0.385188	2.29934	5.57325	0.560752	0.999943
ygiL	0.249065	3.22184	1.32992	0.560769	0.999943
cyaY	-0.0947512	7.77418	0.374427	0.561094	0.999943
yeeT	0.398474	2.23516	1.98737	0.561271	0.999943
atoA	-0.637473	1.53741	6.03902	0.561338	0.999943
ycjX	0.189231	3.88219	0.537637	0.561407	0.999943
pmrD	-0.138917	5.6585	0.373335	0.56165	0.999943
mnaT	0.220391	5.30591	0.372929	0.561857	0.999943
cbl	0.232491	5.55332	0.37287	0.561887	0.999943
frdA	0.320043	8.6285	0.372749	0.561949	0.999943
yibQ	-0.0848646	5.99668	0.599069	0.562444	0.999943
pgeF	0.0997565	6.4444	0.371552	0.562561	0.999943
trpS	0.0891262	8.72041	0.371501	0.562587	0.999943
dnaA	-0.1506	8.10043	0.37073	0.562982	0.999943
ygiS	-0.146348	4.52919	0.591274	0.563015	0.999943
mnmE	-0.128242	7.17227	0.370194	0.563257	0.999943
gmk	-0.134902	9.10717	0.367762	0.564508	0.999943
hslV	0.0664108	7.28546	0.367321	0.564735	0.999943
yeiI	0.104244	5.44908	0.629963	0.564997	0.999943
hypB	0.384443	5.7912	0.366547	0.565135	0.999943
ybfK	-0.710279	1.40766	2.19158	0.565147	0.999943
msrC	0.12765	8.39276	0.366383	0.56522	0.999943
lepB	0.122363	8.50204	0.365754	0.565545	0.999943
ispA	-0.0735193	7.75908	0.365009	0.565931	0.999943
ynjI	-0.170409	4.11533	2.39316	0.565942	0.999943
ydcZ	0.148813	5.30983	0.36469	0.566096	0.999943
lptA	0.0700005	8.13678	0.362611	0.567176	0.999943
ydiO	0.406802	2.16869	6.39394	0.567271	0.999943
nrdD	0.143909	7.86243	0.362219	0.567381	0.999943
yfaX	0.431986	2.06265	1.97336	0.567655	0.999943
msrA	0.133015	5.48923	0.361567	0.567721	0.999943
glpG	-0.0711704	7.63529	0.360522	0.568266	0.999943
narU	-0.551978	1.69046	4.51622	0.569355	0.999943
ligA	-0.10346	6.10274	0.357097	0.570062	0.999943
rimK	0.0815125	6.02631	0.454468	0.570113	0.999943
uhpB	0.132014	4.73645	1.02775	0.57113	0.999943
pncC	-0.0961607	5.77846	0.598731	0.571516	0.999943
hcaD	0.253741	3.10837	2.87059	0.571793	0.999943
secA	0.0748221	8.48166	0.353382	0.572024	0.999943
dusA	0.155365	7.41898	0.352373	0.572559	0.999943
bglF	-0.0958042	5.55147	0.883187	0.572568	0.999943
prlC	0.074981	6.79216	0.35224	0.57263	0.999943
pdxI	-0.193472	3.75607	1.4573	0.572698	0.999943
aroE	0.0764019	7.2477	0.351663	0.572937	0.999943
paaY	0.132181	4.79195	1.64515	0.57313	0.999943
dcuC	0.393253	4.02161	0.350395	0.573612	0.999943
uspC	0.220725	5.67374	0.349794	0.573933	0.999943
nagK	0.0956892	7.0496	0.349085	0.574311	0.999943
trpD	0.2369	3.24982	1.0171	0.574449	0.999943
exoD	0.393146	2.19525	4.38107	0.574652	0.999943
pspF	0.216809	3.45752	0.766752	0.574927	0.999943
yfjR	0.334412	2.49569	2.47248	0.575284	0.999943
fldA	0.0798765	8.86025	0.346909	0.575477	0.999943
nagZ	0.0744885	6.41073	0.681228	0.575953	0.999943
gspD	-0.220237	3.41651	2.27299	0.575988	0.999943
yncD	0.118155	4.92703	0.399774	0.576009	0.999943
talB	0.0626717	9.27607	0.345761	0.576094	0.999943
mobA	0.129149	5.16661	0.344422	0.576816	0.999943
rpsB	0.0671938	11.6512	0.344338	0.576861	0.999943
etk	-0.175841	3.96478	1.53045	0.576883	0.999943
fepG	-0.0828653	5.9774	0.511896	0.576964	0.999943
aldB	-0.337499	2.47015	7.53261	0.577332	0.999943
fliJ	-0.582494	1.59508	2.60598	0.577591	0.999943
yhfY	0.154101	4.3192	1.16721	0.577606	0.999943
ytjB	0.0937969	5.90633	0.34274	0.577725	0.999943
pitA	0.118002	8.48991	0.342495	0.577857	0.999943
ygiQ	0.138929	6.73325	0.342009	0.578121	0.999943
rlpA	0.0522466	7.47018	0.342	0.578125	0.999943
yraJ	-0.18332	3.83632	1.49557	0.580283	0.999943
yghO	-0.176222	3.96136	0.641865	0.58048	0.999943
insL-1	0.0804586	6.30969	0.337617	0.580512	0.999943
insH-5	0.372263	2.26514	3.45441	0.580775	0.999943
folA	-0.202455	7.79101	0.336996	0.580852	0.999943
thrA	0.164173	5.40725	0.336593	0.581073	0.999943
marB	-0.107443	5.34814	0.862031	0.581263	0.999943
yhhY	0.292818	5.5832	0.335885	0.581461	0.999943
rseD	0.0938549	5.6933	0.339872	0.581856	0.999943
lysR	0.153787	4.32538	0.895614	0.581997	0.999943
livM	0.245938	3.11841	3.4439	0.582061	0.999943
dgcJ	-0.219978	3.3802	2.42444	0.582185	0.999943
glpK	0.125105	8.54591	0.334134	0.582424	0.999943
intD	0.10226	6.52969	0.334072	0.582458	0.999943
folE	0.055688	8.98387	0.333723	0.582651	0.999943
rclB	0.172199	3.98627	2.69348	0.582956	0.999943
icd	0.0857304	11.0418	0.332965	0.583069	0.999943
tyrA	0.0974338	5.66805	0.433394	0.583535	0.999943
racC	-0.418049	2.04939	2.64955	0.583558	0.999943
selA	0.100367	6.63614	0.331971	0.583618	0.999943
paaJ	-0.164078	4.1675	0.868856	0.583666	0.999943
cstA	0.115637	6.16308	0.331857	0.583681	0.999943
insC-5	-0.241694	3.14869	0.621083	0.584369	0.999943
yhjE	0.207596	3.49788	0.375452	0.58475	0.999943
rcnA	-0.245197	3.1086	1.98522	0.584847	0.999943
cynR	0.128657	4.73544	1.18761	0.585194	0.999943
fklB	0.0974042	8.92656	0.329126	0.585197	0.999943
intG	0.345781	2.38144	3.98046	0.585216	0.999943
iraP	-0.280494	7.15521	0.328833	0.58536	0.999943
ydhK	-0.189609	3.72341	3.07689	0.58564	0.999943
nuoI	-0.12145	8.90128	0.327733	0.585973	0.999943
yiiR	0.107857	5.21645	1.18245	0.586043	0.999943
fliZ	0.25792	2.98353	0.83634	0.586046	0.999943
ybjQ	0.0903394	6.13205	0.327596	0.58605	0.999943
yigZ	0.0562948	7.19816	0.327262	0.586237	0.999943
yejA	-0.137045	4.48337	0.537303	0.586431	0.999943
insC-4	-0.234636	3.19987	0.516486	0.587443	0.999943
norR	-0.167217	4.00133	0.331614	0.587612	0.999943
yjiV	-0.151623	4.254	1.63386	0.588691	0.999943
selU	-0.112579	5.08578	0.557754	0.589	0.999943
ydbK	0.0786185	5.89348	0.355931	0.589034	0.999943
dcuS	0.100145	5.40167	0.977901	0.589564	0.999943
yddG	0.17502	3.90222	1.13461	0.589717	0.999943
hisM	0.10369	5.42665	0.452862	0.589767	0.999943
kdsA	0.116399	8.37575	0.320888	0.589821	0.999943
ynfA	-0.137258	4.49002	1.4722	0.589829	0.999943
ssuE	0.260475	2.9374	1.04784	0.590182	0.999943
ybdD	0.206261	3.48352	1.00631	0.590383	0.999943
rpoC	0.0805708	10.2981	0.319808	0.590434	0.999943
pgpB	0.0912465	5.62099	0.73837	0.590535	0.999943
tpiA	-0.116388	10.2467	0.319203	0.590777	0.999943
rng	0.0785955	7.15146	0.318388	0.591241	0.999943
proW	0.135891	4.48032	0.340412	0.591346	0.999943
ybcN	0.423675	1.98788	0.883159	0.591917	0.999943
hsdM	0.0684155	7.06731	0.316942	0.592065	0.999943
lplT	-0.0974658	5.33777	0.454549	0.592137	0.999943
yafZ	-0.212677	3.39546	1.68037	0.592318	0.999943
nudG	0.143019	4.47643	1.07476	0.592399	0.999943
fiu	-0.205783	7.98795	0.314939	0.593211	0.999943
manA	0.0639443	6.48182	0.452572	0.593488	0.999943
ydcT	-0.388362	2.12878	6.73658	0.59374	0.999943
yqgD	-0.457673	1.86218	2.07721	0.59391	0.999943
pdxA	-0.0922062	7.7067	0.31312	0.594256	0.999943
flhE	0.313207	2.5211	1.19833	0.594865	0.999943
pdxB	-0.0572574	6.90361	0.416514	0.595174	0.999943
galS	-0.157006	4.21553	0.518991	0.595498	0.999943
yheT	0.0825249	5.87451	0.310596	0.595713	0.999943
ampG	-0.119721	7.20431	0.310033	0.596039	0.999943
ykgH	0.195561	3.57481	2.1207	0.59624	0.999943
nhaB	0.0772653	6.14943	0.356127	0.596329	0.999943
wbbI	0.132549	8.5366	0.308913	0.596689	0.999943
rapZ	-0.0920427	7.74542	0.308359	0.597011	0.999943
chpB	0.110302	5.16291	0.446335	0.597383	0.999943
ppsA	-0.163212	8.21916	0.306216	0.59826	0.999943
yqiJ	0.217124	3.30514	1.49073	0.598423	0.999943
yigA	0.06591	6.71388	0.322719	0.598596	0.999943
ychE	0.0946344	5.55261	0.849722	0.599412	0.999943
nuoJ	-0.11403	9.09261	0.304148	0.599471	0.999943
ybbO	0.0807288	6.05421	0.441971	0.600211	0.999943
ycgR	-0.182568	3.71777	2.8894	0.600335	0.999943
tilS	-0.0785883	6.11456	0.608362	0.600402	0.999943
ybhS	0.145234	4.25933	0.979014	0.600734	0.999943
hupB	-0.0608277	10.7519	0.301777	0.600867	0.999943
fhuD	-0.140788	7.40376	0.301709	0.600907	0.999943
yfcZ	-0.0744171	7.712	0.301623	0.600957	0.999943
rnpA	-0.197143	9.72695	0.300639	0.601539	0.999943
yhhL	0.0879074	5.66075	0.698851	0.602437	0.999943
recJ	0.0641585	7.21867	0.298641	0.602724	0.999943
sgcE	0.220967	3.23674	3.66896	0.602904	0.999943
ybeL	-0.082075	6.5759	0.298177	0.602999	0.999943
sucB	-0.118505	10.3502	0.297511	0.603396	0.999943
erpA	0.126424	9.52758	0.297448	0.603433	0.999943
ldtE	-0.140106	4.34353	1.22007	0.603462	0.999943
yjcZ	0.257058	2.88502	2.28148	0.603971	0.999943
yadH	0.0692564	6.16276	0.457358	0.604432	0.999943
comR	0.0942608	5.55095	0.594688	0.60447	0.999943
rpsK	0.0805422	12.2482	0.295526	0.60458	0.999943
yedI	-0.0916291	5.47142	0.698929	0.604922	0.999943
treC	0.298056	6.21106	0.294541	0.605171	0.999943
selB	0.0545068	6.64616	0.298193	0.605242	0.999943
dsdA	-0.177955	3.74725	2.34232	0.605251	0.999943
ispU	-0.106255	8.65726	0.293117	0.606026	0.999943
rbsB	-0.189088	7.60263	0.292485	0.606406	0.999943
ynbE	0.145721	4.28858	1.41672	0.60699	0.999943
yigB	-0.0602826	6.72112	0.291426	0.607045	0.999943
fdnG	0.24669	3.87692	0.291105	0.607239	0.999943
ybbY	-0.331176	2.34895	4.38426	0.607257	0.999943
fhuF	-0.0759764	10.0325	0.29103	0.607284	0.999943
ybeQ	-0.206638	3.36128	1.07511	0.60781	0.999943
kptA	0.153868	4.43518	0.289906	0.607964	0.999943
leuB	0.208165	3.44953	0.288649	0.608727	0.999943
yghW	-0.305322	2.49707	3.11503	0.609021	0.999943
tamB	0.0755355	6.05485	0.621793	0.609035	0.999943
rluE	-0.157041	5.86396	0.2881	0.609061	0.999943
csdA	0.0655865	6.47021	0.526681	0.609143	0.999943
nanM	-0.191251	3.53773	1.23478	0.609583	0.999943
yejO	0.154713	4.076	1.63042	0.609898	0.999943
adeD	0.127055	4.55157	0.450572	0.609913	0.999943
yigL	-0.070389	6.78083	0.285745	0.610498	0.999943
rclC	0.111022	4.93305	1.04891	0.610761	0.999943
ilvG	0.190193	5.25979	0.28521	0.610825	0.999943
rbsC	-0.229368	7.39506	0.284998	0.610955	0.999943
tmcA	-0.114041	6.35298	0.284997	0.610956	0.999943
zinT	0.232548	3.06123	2.29634	0.611975	0.999943
yzgL	-0.0819271	8.51129	0.283234	0.612038	0.999943
bamD	0.0488674	8.84966	0.283218	0.612048	0.999943
ygiA	-0.0931599	5.54459	0.65674	0.612384	0.999943
lpxL	0.10557	5.05243	0.819104	0.612543	0.999943
ygbM	-0.290008	2.57924	3.18426	0.612784	0.999943
yeeD	-0.0869041	9.36487	0.28186	0.612885	0.999943
ydcJ	-0.191409	3.50744	2.32921	0.613814	0.999943
alkB	-0.195101	3.46131	1.64851	0.61412	0.999943
tfaR	-0.273744	2.68891	0.979019	0.614127	0.999943
yejF	-0.0837171	5.72963	0.783792	0.614524	0.999943
fau	-0.0698973	6.4686	0.339775	0.615058	0.999943
tpx	0.076148	11.3746	0.278088	0.615223	0.999943
mokC	-0.142455	4.18456	0.689473	0.615354	0.999943
insE-1	0.110385	4.84103	0.277508	0.615585	0.999943
yajG	-0.0741801	8.62754	0.277224	0.615762	0.999943
crl	0.103935	10.3361	0.276854	0.615993	0.999943
eamB	0.139726	4.34557	0.515589	0.616163	0.999943
ampD	0.116799	5.79725	0.276052	0.616494	0.999943
paaD	-0.380606	2.05282	1.08165	0.616532	0.999943
rnlB	-0.05166	7.33942	0.275922	0.616576	0.999943
glcC	-0.115821	6.81826	0.275035	0.617132	0.999943
ybcH	0.164098	3.86414	1.53722	0.617142	0.999943
potB	0.135931	7.29466	0.274907	0.617212	0.999943
tatC	-0.0811999	8.04088	0.27439	0.617536	0.999943
yeaE	0.130674	4.45914	1.07844	0.61797	0.999943
mcrB	0.0756661	5.88409	0.458562	0.617991	0.999943
yfiM	-0.107897	8.00244	0.272797	0.618539	0.999943
btsR	-0.133331	5.50344	0.27279	0.618543	0.999943
dicA	0.0492673	7.42709	0.272775	0.618553	0.999943
ibpB	0.168303	3.7901	1.49102	0.618858	0.999943
holD	-0.156287	7.45064	0.272002	0.619041	0.999943
tag	0.104056	5.2486	0.271764	0.619192	0.999943
ynfQ	0.284662	2.5761	0.911744	0.619375	0.999943
blr	-0.228311	5.04985	0.271436	0.619399	0.999943
acpH	-0.105414	4.93388	0.718021	0.619572	0.999943
mazF	-0.0627632	6.43595	0.498116	0.619972	0.999943
prmA	0.115147	7.25559	0.270264	0.620141	0.999943
ulaF	0.190943	3.46699	1.34868	0.620247	0.999943
malF	-0.250582	2.8396	2.06157	0.620769	0.999943
mltG	-0.0871773	5.84708	0.268978	0.620958	0.999943
metG	0.0891663	8.05388	0.268854	0.621037	0.999943
eutM	0.237717	2.95319	3.36725	0.62105	0.999943
mutT	-0.148724	5.99369	0.268582	0.62121	0.999943
yzfA	0.0669285	8.03507	0.268133	0.621497	0.999943
yfgG	0.115197	7.52285	0.267645	0.621808	0.999943
bluR	0.0533011	7.07369	0.325652	0.621843	0.999943
slmA	0.107892	7.81744	0.267301	0.622028	0.999943
secB	0.053501	9.12995	0.267263	0.622052	0.999943
pxpA	-0.0679478	5.97205	0.298181	0.622372	0.999943
ubiF	0.0631718	6.42947	0.392517	0.622442	0.999943
mlaB	-0.0518029	8.28769	0.266318	0.622657	0.999943
yaeI	0.136305	4.34678	0.782237	0.622769	0.999943
frvB	-0.452134	1.76143	5.46008	0.622799	0.999943
dnaC	-0.0999608	5.9313	0.265378	0.623259	0.999943
yejB	-0.163406	3.82759	1.41435	0.623328	0.999943
radD	0.116184	4.7189	0.888673	0.623835	0.999943
ulaR	0.142894	4.37947	0.264477	0.623838	0.999943
phnL	0.171978	3.6952	0.957078	0.624247	0.999943
lptD	0.0513973	8.28462	0.26361	0.624397	0.999943
ddpD	-0.275931	2.61078	1.91727	0.624562	0.999943
nikR	-0.0989726	5.44815	0.263158	0.624689	0.999943
ispD	-0.0871586	7.1041	0.262982	0.624802	0.999943
yfgM	0.0797142	8.22871	0.262258	0.62527	0.999943
ygeF	0.306311	2.39809	1.30921	0.625625	0.999943
rpmH	-0.169304	10.4435	0.261541	0.625734	0.999943
mhpR	-0.0891632	6.91501	0.260225	0.626588	0.999943
purD	0.164343	10.8377	0.259982	0.626746	0.999943
kup	-0.0711805	5.94502	0.318142	0.626771	0.999943
dksA	0.0672223	9.67258	0.259668	0.626951	0.999943
srlR	0.151555	4.71669	0.259486	0.627069	0.999943
gstA	0.0901327	5.5082	0.286832	0.627116	0.999943
yfdT	0.289659	2.49223	0.571122	0.627502	0.999943
gspI	0.308802	2.36508	3.17239	0.628385	0.999943
ylbH	0.118463	5.00956	0.257351	0.628464	0.999943
ydhP	-0.12011	4.59619	0.667203	0.628603	0.999943
yadE	-0.0893298	5.25614	0.451602	0.629042	0.999943
ubiE	0.0627516	8.28996	0.256253	0.629184	0.999943
ybcQ	0.353396	2.10979	1.6429	0.630502	0.999943
setC	-0.356393	2.09624	3.32766	0.630504	0.999943
ykfH	-0.203389	3.24603	1.25571	0.630988	0.999943
yidD	-0.201361	8.99912	0.252636	0.631569	0.999943
pyrE	0.201632	7.64792	0.251604	0.632254	0.999943
gltK	-0.0792677	5.98609	0.491136	0.63226	0.999943
purB	0.136435	9.23772	0.251551	0.632289	0.999943
dacC	-0.113116	4.6323	0.302214	0.63254	0.999943
hemY	0.0568665	7.19587	0.250661	0.632881	0.999943
insI-3	0.405311	2.07806	0.250612	0.632914	0.999943
creC	0.111389	4.79537	0.729896	0.633263	0.999943
hscA	0.177231	8.59605	0.249244	0.633827	0.999943
nimR	0.14191	4.13107	0.51517	0.633887	0.999943
yidL	-0.321458	2.25906	1.45953	0.634136	0.999943
chpS	0.105235	5.04102	0.459682	0.634175	0.999943
yqeI	-0.203741	3.21571	1.35739	0.634851	0.999943
cpoB	-0.0646099	9.61073	0.247661	0.634887	0.999943
uxaA	0.184859	3.44262	1.97085	0.634936	0.999943
qseB	0.14212	4.51937	0.247172	0.635215	0.999943
ybcM	-0.0988354	4.91765	0.302354	0.635538	0.999943
hscB	0.194941	8.24893	0.246661	0.635559	0.999943
uup	0.106088	7.00436	0.246659	0.63556	0.999943
yhiS	-0.284793	2.48115	3.1434	0.635774	0.999943
fadD	0.133052	5.82566	0.246282	0.635814	0.999943
gntR	-0.0482389	7.0471	0.2723	0.636239	0.999943
dsbD	0.0856378	5.53615	0.359311	0.636276	0.999943
gnsA	-0.115715	7.5617	0.244695	0.636885	0.999943
yjjP	0.28032	4.32983	0.244278	0.637167	0.999943
rsmI	-0.0742414	5.82071	0.477506	0.637224	0.999943
ycbF	0.123877	4.52606	0.285125	0.637521	0.999943
moaE	0.0989398	6.89702	0.243716	0.637548	0.999943
roxA	0.0688865	7.71924	0.243606	0.637622	0.999943
ycbZ	0.0867059	7.2017	0.243588	0.637635	0.999943
flgN	0.118846	4.60951	0.811693	0.637806	0.999943
fimH	-0.0941984	8.31301	0.242678	0.638253	0.999943
insH-10	-0.283083	2.47764	1.62023	0.638328	0.999943
bssS	-0.106977	7.72261	0.24245	0.638408	0.999943
bolA	-0.0942929	7.7667	0.242338	0.638484	0.999943
panD	-0.0518953	10.094	0.242035	0.63869	0.999943
modA	0.100504	4.96404	0.998519	0.638846	0.999943
yedX	-0.165752	3.67865	1.22519	0.639337	0.999943
rpsS	0.0733913	11.4572	0.239746	0.640253	0.999943
ynfK	0.37591	6.92681	0.239512	0.640414	0.999943
recN	-0.106561	6.76623	0.239373	0.640509	0.999943
srmB	0.136626	6.76012	0.238551	0.641074	0.999943
ybbJ	-0.0901825	5.21402	0.274715	0.641075	0.999943
ydeR	-0.459987	1.66379	4.41621	0.641258	0.999943
rho	-0.101411	10.1815	0.237998	0.641453	0.999943
aroD	0.101307	5.04706	0.476671	0.641812	0.999943
rlhA	0.142971	6.05331	0.237152	0.642036	0.999943
ulaB	0.309302	2.28585	2.81661	0.642124	0.999943
hycF	0.326245	2.18825	1.84504	0.642245	0.999943
ribF	0.0529073	8.21698	0.236714	0.642339	0.999943
rpsN	0.0816177	12.1202	0.236103	0.642761	0.999943
ybhI	0.334675	2.13935	1.72312	0.642803	0.999943
smf	0.0994887	5.21132	0.248468	0.642935	0.999943
yggX	0.0504778	8.12074	0.235257	0.643347	0.999943
rpsL	0.0793147	12.8774	0.23514	0.643428	0.999943
ubiI	-0.0813581	6.47766	0.234843	0.643634	0.999943
dapD	-0.0479265	9.37789	0.234554	0.643835	0.999943
ybiR	-0.0847199	5.82646	0.234522	0.643857	0.999943
cyoA	0.0926715	11.1367	0.2345	0.643872	0.999943
argR	-0.0659642	8.0644	0.234317	0.644	0.999943
csgE	0.17315	3.98891	0.233973	0.644239	0.999943
insE-5	-0.106389	4.85778	0.433732	0.644362	0.999943
yfbN	-0.308501	2.27904	1.61109	0.644768	0.999943
yhbE	-0.196609	8.19342	0.232546	0.645233	0.999943
eutT	0.450152	1.67358	5.02173	0.645513	0.999943
mprA	0.0601506	7.35978	0.231699	0.645826	0.999943
mug	0.0859286	5.68248	0.3788	0.645987	0.999943
sdhC	-0.102598	10.2725	0.231228	0.646156	0.999943
emrK	0.304477	2.28228	2.97501	0.648051	0.999943
torT	0.176687	4.04474	0.22794	0.648471	0.999943
ftsP	0.0533801	7.07243	0.227898	0.6485	0.999943
yrbG	0.063315	6.2155	0.403786	0.648851	0.999943
fepB	-0.0881877	6.75259	0.227283	0.648936	0.999943
adk	-0.0598195	9.41382	0.226272	0.649653	0.999943
sgbH	0.290918	2.35992	1.02473	0.649675	0.999943
wecE	-0.0635089	7.05899	0.225952	0.649881	0.999943
hofN	-0.339472	2.07993	3.20127	0.649913	0.999943
yphC	0.215499	2.97732	2.84229	0.65038	0.999943
rplI	0.0823665	11.5266	0.225132	0.650464	0.999943
nnr	-0.0835189	5.34993	0.566505	0.650566	0.999943
[truncated: 2,185 more rows]

## Sheet: J15_0_vs_J15_1_putrescine
genes	logFC	logCPM	F	PValue	FDR
mgtA	-7.73669	13.5655	584.157	1.21344e-09	5.11334e-06
ppiC	5.02071	8.37992	454.618	3.77655e-09	5.11334e-06
fliC	-10.7521	5.82812	433.073	4.70259e-09	5.11334e-06
bfd	5.08323	7.42351	430.321	4.83988e-09	5.11334e-06
cspE	6.36473	13.8733	379.238	8.55622e-09	6.289e-06
ybiJ	3.84322	5.70012	360.574	1.0738e-08	6.289e-06
zntA	-4.91968	10.5768	357.417	1.11711e-08	6.289e-06
ynaJ	4.90217	9.78262	352.392	1.19054e-08	6.289e-06
yhaL	4.09268	5.28252	305.87	2.24749e-08	9.53804e-06
yfcZ	3.81962	6.77101	305.582	2.25699e-08	9.53804e-06
queD	4.02755	6.36613	283.434	3.16048e-08	1.13425e-05
yihD	4.54089	7.97749	277.936	3.44964e-08	1.13425e-05
rpmH	5.13476	9.54809	277.228	3.48919e-08	1.13425e-05
ychH	3.60525	5.91898	272.48	3.76904e-08	1.13771e-05
gnsB	5.27067	8.9609	267.614	4.08477e-08	1.15082e-05
cspA	4.30699	12.8869	263.736	4.35965e-08	1.15149e-05
ydbA	-5.6952	9.60745	243.39	6.23437e-08	1.347e-05
rcsF	3.73061	6.42922	238.74	6.79289e-08	1.347e-05
yecF	4.03108	6.76428	235.485	7.22031e-08	1.347e-05
yfhM	-3.57793	8.02218	234.815	7.31239e-08	1.347e-05
yeeJ	-3.57259	6.09277	233.799	7.45465e-08	1.347e-05
yciN	4.70344	8.81893	233.315	7.52361e-08	1.347e-05
grxA	3.12469	5.76628	231.285	7.82135e-08	1.347e-05
yhcO	3.14029	5.25909	230.639	7.91914e-08	1.347e-05
nuoK	4.35879	6.79938	224.445	8.93643e-08	1.347e-05
dsrB	4.40182	7.79503	224.399	8.94459e-08	1.347e-05
fecI	4.17349	7.51929	221.74	9.43022e-08	1.347e-05
ilvG	-5.1109	9.34538	220.133	9.73927e-08	1.347e-05
ycaR	3.21217	7.1493	216.121	1.05666e-07	1.347e-05
yicN	3.09444	4.84124	215.401	1.07239e-07	1.347e-05
tusE	3.38492	6.64898	215.297	1.0747e-07	1.347e-05
cedA	3.5333	5.12302	214.949	1.08243e-07	1.347e-05
yabQ	3.48849	6.49362	214.253	1.09809e-07	1.347e-05
npr	3.04966	5.61559	213.585	1.11339e-07	1.347e-05
yehS	3.15321	6.6602	213.489	1.11559e-07	1.347e-05
yaiZ	3.54071	6.05621	211.604	1.16029e-07	1.34862e-05
infA	4.28246	10.5182	210.77	1.18076e-07	1.34862e-05
fumD	4.13295	5.57991	208.082	1.24977e-07	1.38988e-05
yfcL	3.69686	7.50807	203.156	1.38946e-07	1.43148e-05
entH	4.95639	6.90223	201.829	1.43028e-07	1.43148e-05
yfjF	3.12993	7.22177	199.988	1.4894e-07	1.43148e-05
ydiE	3.81972	5.19839	197.947	1.55842e-07	1.43148e-05
panD	3.99323	9.27713	197.544	1.57251e-07	1.43148e-05
yiaG	3.54954	7.28582	197.145	1.58661e-07	1.43148e-05
ybcJ	4.54887	6.18342	196.581	1.60682e-07	1.43148e-05
cydX	3.89325	6.26804	195.817	1.63465e-07	1.43148e-05
cutA	3.41912	4.94092	195.434	1.64884e-07	1.43148e-05
leuA	-3.26738	5.7384	195.188	1.65804e-07	1.43148e-05
yfaL	-3.26915	6.0527	194.824	1.67175e-07	1.43148e-05
dicA	3.35789	6.77676	194.25	1.69366e-07	1.43148e-05
csrA	3.29195	10.2381	193.156	1.73639e-07	1.43882e-05
ubiK	3.25911	6.97816	191.493	1.80391e-07	1.46603e-05
ybdZ	6.20663	4.7106	189.105	1.90652e-07	1.50171e-05
cyaY	3.10006	7.32431	188.828	1.91889e-07	1.50171e-05
yfaE	4.25159	8.533	186.885	2.00833e-07	1.54313e-05
ppnP	3.46863	7.53964	185.867	2.05728e-07	1.54582e-05
yccU	3.42275	6.94829	185.303	2.08499e-07	1.54582e-05
sgrT	7.88644	3.63324	184.476	2.12647e-07	1.54939e-05
thrA	-4.10875	8.46885	182.25	2.24318e-07	1.60672e-05
ypjA	-4.69832	7.23991	177.505	2.51914e-07	1.75647e-05
feoA	3.08677	5.14783	177.246	2.53537e-07	1.75647e-05
mokB	3.28514	4.89507	176.266	2.59789e-07	1.75996e-05
acrZ	4.32951	5.9736	174.543	2.71247e-07	1.75996e-05
yjbD	3.34694	5.08442	174.302	2.72898e-07	1.75996e-05
soxS	4.41711	6.52165	174.015	2.74878e-07	1.75996e-05
xseB	3.5819	6.89591	173.193	2.8065e-07	1.75996e-05
hha	4.23938	8.18257	172.33	2.86877e-07	1.75996e-05
entC	4.62099	7.0196	171.858	2.90353e-07	1.75996e-05
ybdJ	4.53747	5.39681	171.837	2.90507e-07	1.75996e-05
fdhE	3.12518	8.1795	170.807	2.98274e-07	1.75996e-05
ecnB	2.79483	6.46304	170.604	2.99835e-07	1.75996e-05
yoaF	2.86229	4.46946	170.601	2.99852e-07	1.75996e-05
yhcN	2.72471	7.81305	169.506	3.08449e-07	1.78562e-05
ybeD	5.34227	8.24394	168.151	3.19495e-07	1.8018e-05
waaL	3.07905	7.43866	167.577	3.24325e-07	1.8018e-05
rraB	3.4167	9.90724	166.692	3.31941e-07	1.8018e-05
yjjY	3.40734	6.12986	166.497	3.33644e-07	1.8018e-05
clsA	-2.72807	7.46511	165.923	3.38735e-07	1.8018e-05
ybaT	-3.12014	6.26608	165.863	3.39274e-07	1.8018e-05
ydcY	2.97199	7.72824	165.294	3.44415e-07	1.8018e-05
yjdM	3.32432	7.05996	165.192	3.45352e-07	1.8018e-05
yggX	3.31357	7.44951	163.67	3.5964e-07	1.85064e-05
pdeA	-2.89148	6.69865	163.274	3.63472e-07	1.85064e-05
murI	2.84988	7.22913	162.022	3.75926e-07	1.88107e-05
ackA	2.96247	7.20805	161.784	3.78351e-07	1.88107e-05
ymgF	4.59266	4.20041	161.305	3.83294e-07	1.88349e-05
torS	-3.02158	5.28093	160.128	3.95773e-07	1.89708e-05
fecR	4.00376	6.63945	159.956	3.97641e-07	1.89708e-05
hokB	2.97222	3.7917	159.783	3.99526e-07	1.89708e-05
gloA	3.60877	7.31406	158.823	4.10203e-07	1.92613e-05
ybiI	4.07754	4.65906	157.932	4.20413e-07	1.93614e-05
yecN	3.01883	5.78683	157.839	4.21498e-07	1.93614e-05
icdC	3.92086	9.60002	157.006	4.31354e-07	1.96011e-05
yacG	2.91933	6.85993	156.171	4.41523e-07	1.97722e-05
ldrA	3.22803	4.40112	155.933	4.44477e-07	1.97722e-05
dinJ	3.413	7.915	155.194	4.53801e-07	1.99372e-05
ushA	-2.99144	7.6878	154.557	4.62015e-07	1.99372e-05
mntS	5.51343	7.04238	154.533	4.6234e-07	1.99372e-05
sra	4.46444	6.35335	154.076	4.68348e-07	1.99923e-05
yeiS	2.53617	3.76174	153.088	4.81695e-07	2.03564e-05
yejL	3.80995	6.49268	152.286	4.92859e-07	2.0622e-05
trxA	3.36382	10.7196	151.529	5.03696e-07	2.08688e-05
yncO	3.1696	4.57153	150.36	5.20989e-07	2.09081e-05
chiA	-2.6065	5.66837	150.254	5.22599e-07	2.09081e-05
glnB	2.9732	7.73731	150.18	5.2372e-07	2.09081e-05
csrD	-2.64438	7.49552	150.133	5.24434e-07	2.09081e-05
fdoI	3.01027	8.91238	149.558	5.33288e-07	2.10624e-05
yeeS	2.73985	4.53861	148.029	5.57707e-07	2.18229e-05
yqfB	2.80685	6.35439	146.583	5.82069e-07	2.24489e-05
yeaQ	3.25749	8.75765	146.159	5.89463e-07	2.24489e-05
malQ	-2.61956	6.61254	146.114	5.9025e-07	2.24489e-05
yjeT	3.4957	4.74337	145.848	5.94954e-07	2.24489e-05
yfaS	-3.35317	4.52463	145.184	6.0688e-07	2.25754e-05
rhsD	-3.06863	5.96825	145.068	6.0899e-07	2.25754e-05
recC	-2.49384	7.04151	143.29	6.42554e-07	2.36125e-05
ribA	2.50293	7.04753	142.876	6.50701e-07	2.37057e-05
yneO	-3.99446	6.52473	142.141	6.65451e-07	2.38374e-05
nuoI	3.63628	7.85579	141.881	6.70771e-07	2.38374e-05
entA	4.01543	6.90987	141.858	6.71237e-07	2.38374e-05
yhjR	2.18097	5.91934	141.507	6.78509e-07	2.38948e-05
yaiT	-3.47697	6.99192	140.328	7.03637e-07	2.41106e-05
mepM	-2.89294	7.40068	140.203	7.06361e-07	2.41106e-05
ydgC	2.35941	5.0751	140.036	7.10028e-07	2.41106e-05
infB	-3.70504	12.024	139.844	7.14267e-07	2.41106e-05
ubiX	2.45086	6.39572	139.816	7.14889e-07	2.41106e-05
glsA	-4.1132	6.85056	139.638	7.18869e-07	2.41106e-05
mppA	-2.67439	6.90174	138.756	7.38922e-07	2.45881e-05
fdhF	-3.08193	6.67828	135.692	8.14065e-07	2.68769e-05
yoaL	5.58095	3.92291	135.036	8.31361e-07	2.72351e-05
entE	4.3079	6.85163	133.165	8.83162e-07	2.8146e-05
yoaH	3.3115	6.48798	133.161	8.83297e-07	2.8146e-05
ppa	3.04269	10.9805	133.058	8.86257e-07	2.8146e-05
pptA	2.82304	3.02786	132.544	9.01216e-07	2.8146e-05
purB	4.04094	8.14369	132.515	9.02084e-07	2.8146e-05
ychJ	2.10011	6.32695	132.414	9.05053e-07	2.8146e-05
rpsU	3.36483	10.8852	132.243	9.10139e-07	2.8146e-05
fimH	2.6161	7.57317	131.896	9.20567e-07	2.8146e-05
ygiN	2.66199	8.08361	131.753	9.249e-07	2.8146e-05
fimG	2.3137	7.15467	131.724	9.25766e-07	2.8146e-05
yqaE	3.44673	5.49581	130.604	9.60628e-07	2.89972e-05
entB	4.60278	7.15268	128.873	1.01767e-06	2.99768e-05
opgB	-2.59398	8.05689	128.843	1.01869e-06	2.99768e-05
ybgU	2.99914	4.3565	128.599	1.02708e-06	2.99768e-05
etk	-2.42747	5.57193	128.39	1.03432e-06	2.99768e-05
trxC	2.99983	7.23837	128.319	1.03679e-06	2.99768e-05
tatE	3.15022	8.58868	128.206	1.04073e-06	2.99768e-05
ymjA	3.03773	4.58313	128.149	1.04273e-06	2.99768e-05
pdeR	-2.74277	5.96604	127.94	1.05014e-06	2.99858e-05
ldrC	3.09506	4.46076	127.231	1.07564e-06	3.03622e-05
clcA	-2.51538	6.83197	127.175	1.07769e-06	3.03622e-05
erpA	2.81931	8.97476	126.796	1.09165e-06	3.05033e-05
aas	-2.24309	6.89889	126.649	1.09714e-06	3.05033e-05
yhhM	2.42518	5.47032	125.698	1.13342e-06	3.13062e-05
dinI	2.78168	7.57525	125.105	1.15682e-06	3.17449e-05
cusF	3.93527	3.62671	124.691	1.17346e-06	3.19669e-05
speC	-2.39357	7.82791	124.53	1.18004e-06	3.19669e-05
yciA	2.52626	6.77785	123.527	1.22191e-06	3.26539e-05
yhbY	2.60899	8.97948	123.306	1.23138e-06	3.26539e-05
nadC	2.45853	6.12567	123.247	1.23392e-06	3.26539e-05
leuC	-2.4973	5.14059	122.904	1.24885e-06	3.26539e-05
tpx	3.31991	10.3958	122.841	1.25161e-06	3.26539e-05
yheU	2.59289	4.22101	122.769	1.25474e-06	3.26539e-05
yehE	2.70742	3.27382	122.653	1.25987e-06	3.26539e-05
ligA	-2.75116	8.2518	122.457	1.26861e-06	3.26539e-05
tatA	2.60284	9.00576	122.216	1.27941e-06	3.26539e-05
hokA	3.05521	4.03707	122.144	1.28267e-06	3.26539e-05
mtgA	-3.00813	5.39866	121.813	1.29775e-06	3.27196e-05
bglJ	2.0926	6.151	121.748	1.30073e-06	3.27196e-05
ndk	2.64692	8.54203	120.647	1.3526e-06	3.38203e-05
yejO	-3.13615	6.60627	120.484	1.36049e-06	3.38203e-05
ubiG	2.17774	6.09043	120.226	1.37312e-06	3.39346e-05
yrdB	2.50696	7.38675	118.68	1.45173e-06	3.56687e-05
grxD	3.30078	8.88381	116.938	1.54699e-06	3.77895e-05
stpA	3.88832	6.68625	116.316	1.58284e-06	3.81808e-05
bcsF	3.27892	3.40512	116.314	1.58299e-06	3.81808e-05
rbsD	3.59034	7.56867	116.192	1.59011e-06	3.81808e-05
fklB	2.31867	7.93007	115.971	1.60316e-06	3.82767e-05
rhsB	-2.58182	5.42198	115.619	1.62426e-06	3.85624e-05
yfgD	2.86536	8.06027	115.337	1.64138e-06	3.87513e-05
helD	-2.37097	7.42648	114.883	1.66941e-06	3.91939e-05
rpmG	3.09118	11.1122	114.543	1.69076e-06	3.9476e-05
rcnA	-3.3558	6.28051	113.951	1.72875e-06	4.01413e-05
bglX	-2.33507	7.47004	113.743	1.74231e-06	4.02349e-05
ybdF	2.4668	4.33375	112.973	1.7938e-06	4.10283e-05
ybaQ	2.06086	6.44903	112.94	1.79608e-06	4.10283e-05
ylaC	2.24305	6.43577	112.668	1.81475e-06	4.11149e-05
proP	-2.99532	9.36533	112.601	1.81933e-06	4.11149e-05
yrbN	-5.14954	4.27614	111.29	1.91297e-06	4.28559e-05
acrB	-2.59516	9.74253	111.24	1.91665e-06	4.28559e-05
ilvI	-2.38021	5.60086	111.007	1.93395e-06	4.30151e-05
lldR	2.18272	5.00871	110.308	1.98696e-06	4.39627e-05
ppiA	2.72457	7.47761	110.067	2.00559e-06	4.40107e-05
ycgH	-4.14276	7.50963	110.011	2.00995e-06	4.40107e-05
yhfA	2.44557	6.71886	109.255	2.07012e-06	4.50945e-05
yggU	2.4472	5.19004	109.114	2.0816e-06	4.5112e-05
elfC	-3.08501	4.43844	108.828	2.1051e-06	4.53619e-05
stfR	-3.17835	3.98689	108.713	2.1146e-06	4.53619e-05
ibaG	2.24274	7.77559	108.495	2.13283e-06	4.55219e-05
apaG	2.69603	7.9758	108.334	2.1464e-06	4.55814e-05
ychN	2.59322	7.27024	107.574	2.21202e-06	4.65332e-05
glgS	2.73977	6.281	107.56	2.21324e-06	4.65332e-05
rpoZ	2.64824	8.82845	107.095	2.25458e-06	4.71675e-05
rhsA	-2.60405	4.78215	106.926	2.26978e-06	4.72516e-05
glnE	-2.13147	7.49302	106.446	2.31381e-06	4.79322e-05
rpsT	3.2428	12.1457	105.927	2.36257e-06	4.8007e-05
ydbH	-2.08018	5.92198	105.846	2.37032e-06	4.8007e-05
ybhB	2.96566	7.58565	105.732	2.38123e-06	4.8007e-05
ldtD	-2.2132	6.75319	105.7	2.38432e-06	4.8007e-05
yjiV	-2.55584	6.01338	105.545	2.39931e-06	4.8007e-05
elaB	2.70567	7.50335	105.434	2.41002e-06	4.8007e-05
mutT	2.30845	5.30784	105.378	2.4155e-06	4.8007e-05
potF	-2.59899	6.39959	105.364	2.41693e-06	4.8007e-05
torZ	-3.04773	5.07368	105.336	2.41966e-06	4.8007e-05
yciY	3.1204	7.83244	104.863	2.46657e-06	4.85509e-05
rhsC	-3.39151	5.78073	104.828	2.47005e-06	4.85509e-05
mngB	-2.84024	5.05404	103.7	2.58659e-06	5.05017e-05
ycgV	-2.70375	5.23984	103.638	2.5932e-06	5.05017e-05
nuoJ	3.26845	7.86014	103.321	2.6273e-06	5.0931e-05
lpp	3.03121	13.2778	102.878	2.67582e-06	5.14844e-05
yibL	2.69166	6.25771	102.798	2.6846e-06	5.14844e-05
yagN	2.80947	7.0381	102.527	2.71497e-06	5.14844e-05
rpoC	-3.17344	12.4662	102.521	2.71566e-06	5.14844e-05
nudI	2.06463	4.08077	102.421	2.72698e-06	5.14844e-05
tyrR	-2.2779	7.84139	102.404	2.72894e-06	5.14844e-05
slmA	2.03791	7.15131	101.554	2.8274e-06	5.31049e-05
pepT	-1.9838	6.9853	101.188	2.87117e-06	5.36884e-05
ilvM	-3.56482	3.95147	100.979	2.89649e-06	5.39231e-05
gnsA	2.76032	6.8917	100.643	2.93786e-06	5.44534e-05
ccmD	2.73795	2.89483	100.516	2.95368e-06	5.45077e-05
folX	2.17403	7.03012	100.214	2.99162e-06	5.49677e-05
smpB	2.79895	6.99388	99.4555	3.0898e-06	5.65259e-05
yeaO	2.40053	4.95667	97.9851	3.29144e-06	5.99552e-05
tamB	-2.04061	7.36084	97.7885	3.31959e-06	6.02085e-05
dppA	-2.95328	8.09119	97.5864	3.34885e-06	6.02276e-05
speA	-2.5872	9.86856	97.5125	3.35962e-06	6.02276e-05
pspE	2.29449	6.09813	97.4866	3.3634e-06	6.02276e-05
mdaB	2.34009	6.40552	97.2415	3.39949e-06	6.02971e-05
araE	-2.55336	5.711	97.2101	3.40416e-06	6.02971e-05
rcsC	-2.47475	7.5403	97.1702	3.41008e-06	6.02971e-05
yjbJ	2.81893	9.03447	96.3795	3.53022e-06	6.1977e-05
yicG	2.39652	4.95758	96.3	3.54258e-06	6.1977e-05
ymiA	2.67105	2.75409	96.2583	3.54909e-06	6.1977e-05
exbD	2.28952	8.60489	95.9019	3.60529e-06	6.19833e-05
yraQ	-2.25423	6.39171	95.8689	3.61054e-06	6.19833e-05
zipA	-2.67612	9.68674	95.8143	3.61927e-06	6.19833e-05
mgtS	-5.85786	5.28507	95.8047	3.6208e-06	6.19833e-05
nfuA	2.90373	8.38827	95.7923	3.62278e-06	6.19833e-05
mtn	2.78958	8.29308	95.6406	3.64718e-06	6.21492e-05
yfgG	2.94884	6.43777	95.2632	3.70874e-06	6.26092e-05
exbB	2.33218	9.3073	95.227	3.71471e-06	6.26092e-05
kefC	-2.14222	5.84094	95.2033	3.71862e-06	6.26092e-05
nfrB	-2.58118	5.20106	95.0252	3.74821e-06	6.27281e-05
yeaC	2.33227	8.30765	94.9823	3.75537e-06	6.27281e-05
yzfA	2.93373	7.63434	94.8644	3.77517e-06	6.28105e-05
entD	2.33645	4.86856	94.1923	3.89043e-06	6.42543e-05
yacC	2.10113	6.35771	94.1813	3.89235e-06	6.42543e-05
ygdR	2.95203	7.99995	93.2809	4.05364e-06	6.63101e-05
ycjD	2.73508	2.54095	93.1906	4.07028e-06	6.63101e-05
fimF	2.29189	7.82106	93.1465	4.07843e-06	6.63101e-05
ratA	2.15619	7.43842	92.981	4.10918e-06	6.63101e-05
yecH	2.23275	4.16325	92.9748	4.11034e-06	6.63101e-05
yaeR	2.03017	5.78835	92.7842	4.14611e-06	6.63101e-05
ilvD	-2.46117	7.19152	92.7558	4.15148e-06	6.63101e-05
yebV	2.34352	6.27215	92.7496	4.15265e-06	6.63101e-05
aer	-2.63	6.24446	92.7208	4.15811e-06	6.63101e-05
yfcU	-3.43801	5.45967	92.5385	4.1928e-06	6.66119e-05
acrF	-2.33887	4.70631	92.4545	4.20891e-06	6.66175e-05
ydgA	-2.40214	8.86137	92.0513	4.2873e-06	6.76049e-05
ldcC	-2.01424	6.28408	91.3713	4.42354e-06	6.94939e-05
nudJ	2.74157	5.2448	91.2909	4.43999e-06	6.94941e-05
puuB	2.53134	3.42846	90.7256	4.55782e-06	7.10751e-05
yhdV	4.03456	4.90429	90.5211	4.60139e-06	7.13049e-05
topA	-2.31862	9.13103	90.4982	4.6063e-06	7.13049e-05
leuB	-2.33286	4.93324	90.2575	4.65829e-06	7.17752e-05
racR	2.63807	7.16636	90.1473	4.68232e-06	7.17752e-05
rnk	2.22502	6.12533	90.1231	4.68763e-06	7.17752e-05
yfbV	1.96797	5.53739	90.0292	4.70827e-06	7.18309e-05
rpmE	3.10107	10.0317	89.817	4.7553e-06	7.22874e-05
yeeN	2.28347	8.47516	89.4224	4.84429e-06	7.33763e-05
caiF	2.05822	4.24712	89.2858	4.87557e-06	7.35863e-05
tehB	2.33624	5.48243	89.1301	4.91153e-06	7.36117e-05
holD	1.95223	6.92014	89.1277	4.91209e-06	7.36117e-05
alaE	2.0235	6.32067	88.4338	5.07634e-06	7.55074e-05
bioC	2.55552	6.98677	88.2785	5.114e-06	7.55074e-05
mrcA	-2.96243	8.08491	88.2577	5.11907e-06	7.55074e-05
bisC	-1.88751	6.76232	88.2565	5.11937e-06	7.55074e-05
yiiS	2.22072	4.97388	88.2214	5.12793e-06	7.55074e-05
yebW	2.31026	4.14164	88.0537	5.16914e-06	7.585e-05
ompA	-2.80371	13.9474	87.5598	5.29281e-06	7.73959e-05
ybiX	3.38394	5.53838	87.4266	5.32679e-06	7.76205e-05
yceB	2.49814	6.49004	87.356	5.3449e-06	7.76205e-05
dgcE	-2.0051	5.28823	87.2612	5.36935e-06	7.77084e-05
yfgJ	1.97783	6.36443	86.4608	5.58124e-06	8.04994e-05
lldD	2.07424	5.18838	85.8509	5.74955e-06	8.26449e-05
slyX	2.12743	6.25274	85.6643	5.80227e-06	8.29686e-05
phoQ	-2.23054	7.47429	85.6261	5.81315e-06	8.29686e-05
ansB	-1.87577	5.67709	85.5636	5.83097e-06	8.29686e-05
malP	-2.61149	6.16149	85.4122	5.87444e-06	8.33067e-05
nnr	-2.13038	6.99949	85.2927	5.90905e-06	8.35172e-05
alaS	-2.13871	10.3133	85.1644	5.94647e-06	8.36537e-05
yraJ	-2.0199	5.13909	85.0993	5.96556e-06	8.36537e-05
rbsC	2.37841	5.7544	85.0567	5.97809e-06	8.36537e-05
hrpA	-2.06585	7.58023	84.5176	6.13955e-06	8.51046e-05
yheV	3.06014	5.41594	84.482	6.1504e-06	8.51046e-05
trg	-2.37684	5.08699	84.331	6.19667e-06	8.51046e-05
fdoH	2.20853	8.84045	84.2212	6.23058e-06	8.51046e-05
yciZ	2.70099	3.74771	84.2123	6.23334e-06	8.51046e-05
yidE	-2.05625	5.80107	84.1985	6.2376e-06	8.51046e-05
glgB	-2.06836	7.82445	84.1871	6.24115e-06	8.51046e-05
mokC	2.40016	3.87639	84.1155	6.26343e-06	8.51046e-05
prc	-2.17569	9.86952	84.0872	6.27226e-06	8.51046e-05
prpE	-2.56891	4.72895	84.0524	6.28316e-06	8.51046e-05
pgaA	-3.56149	6.03936	83.8942	6.33291e-06	8.55043e-05
fepD	2.06741	5.24236	83.7676	6.37308e-06	8.57727e-05
yicI	-2.10884	4.39733	83.5119	6.45517e-06	8.5902e-05
pnp	-2.52083	11.2308	83.4908	6.46201e-06	8.5902e-05
zur	1.72266	5.96142	83.4882	6.46283e-06	8.5902e-05
ybaM	2.36064	5.1007	83.4233	6.48391e-06	8.5902e-05
xseA	-1.753	6.81558	83.422	6.48432e-06	8.5902e-05
hpf	1.97992	7.69246	82.9543	6.63867e-06	8.7672e-05
ruvC	2.2379	7.74519	82.7591	6.70443e-06	8.82646e-05
ygaC	2.53779	5.62543	82.3829	6.83336e-06	8.96826e-05
sbmA	-1.83803	5.82794	82.0899	6.9359e-06	9.07465e-05
yciQ	-1.93722	5.52803	81.8081	7.03626e-06	9.09157e-05
yaaX	2.77858	5.52485	81.8034	7.03794e-06	9.09157e-05
hspQ	2.26084	7.6555	81.7847	7.04468e-06	9.09157e-05
ttdT	-2.3243	4.62062	81.7637	7.05224e-06	9.09157e-05
bamA	-2.55836	10.6445	81.7162	7.06937e-06	9.09157e-05
trmD	-2.57383	12.9194	81.6926	7.07791e-06	9.09157e-05
gpt	2.51326	9.83728	81.582	7.11808e-06	9.09926e-05
yqgB	2.49805	5.0404	81.5576	7.12696e-06	9.09926e-05
moaD	2.32483	5.81434	81.3402	7.20684e-06	9.17005e-05
yifL	2.11918	7.11776	81.2891	7.22581e-06	9.17005e-05
ykfC	-1.83625	6.57178	81.1148	7.29083e-06	9.22487e-05
ompC	-2.41882	14.1518	80.8215	7.4019e-06	9.33744e-05
fimE	1.95789	4.5321	80.6781	7.45695e-06	9.37889e-05
mscK	-2.36249	8.24051	80.5379	7.51128e-06	9.40637e-05
ybeY	2.00898	6.70597	80.4903	7.52983e-06	9.40637e-05
rdgB	1.86823	6.06811	80.45	7.54557e-06	9.40637e-05
mukB	-2.28452	8.92759	80.2006	7.64392e-06	9.50094e-05
dnaT	1.87704	5.88513	80.1175	7.67701e-06	9.51409e-05
tpr	4.56435	1.84892	79.983	7.73098e-06	9.55296e-05
mukF	-1.77638	7.98312	79.7909	7.80888e-06	9.61771e-05
ybjN	1.74527	6.88228	79.7419	7.8289e-06	9.61771e-05
xylB	-1.80215	5.4847	79.5557	7.90554e-06	9.68182e-05
yhjG	-2.10776	5.62353	79.5042	7.9269e-06	9.68182e-05
yidD	3.19877	7.7596	79.2643	8.02731e-06	9.7762e-05
creC	-1.98354	5.74503	79.1566	8.07294e-06	9.80352e-05
ydhL	2.36159	3.01085	79.0674	8.1109e-06	9.82139e-05
yjbB	-1.93588	5.5536	78.5476	8.33675e-06	0.00010066
argH	-1.79617	6.23037	78.4188	8.39386e-06	0.000100931
ecnA	1.7871	4.22827	78.3894	8.40696e-06	0.000100931
ykgF	-2.25606	5.8009	78.1682	8.50639e-06	0.000101836
yebZ	-1.87726	7.31039	78.0801	8.5464e-06	0.000102026
trmO	2.67864	5.1898	77.9381	8.61136e-06	0.000102512
cvpA	2.03516	9.98973	77.7289	8.70814e-06	0.000103045
yejF	-2.51425	7.83464	77.6995	8.72184e-06	0.000103045
nuoH	2.35372	7.98891	77.6835	8.72932e-06	0.000103045
ecpC	-2.12969	4.72359	77.5917	8.77232e-06	0.000103264
dacD	-1.85954	5.44449	77.5065	8.81247e-06	0.000103449
sfsB	1.68424	5.87334	77.1608	8.97774e-06	0.00010502
torA	-2.84967	3.92258	77.1229	8.99607e-06	0.00010502
iscX	2.69566	8.15145	76.6865	9.21061e-06	0.000107229
yhcB	2.0226	8.63273	76.5751	9.26639e-06	0.000107582
frmA	-2.74962	8.85017	76.4394	9.33486e-06	0.000108034
yqiD	3.77677	5.49012	76.3947	9.35757e-06	0.000108034
insN	-1.88036	7.99336	76.3235	9.39382e-06	0.000108034
thrC	-1.99841	6.79545	76.2967	9.40756e-06	0.000108034
rpmF	2.12758	11.3428	76.1308	9.4929e-06	0.000108672
rbbA	-2.24755	6.93409	76.0889	9.51461e-06	0.000108672
rlmL	-1.88494	8.02439	75.8206	9.65509e-06	0.00010998
ydcH	2.28293	5.52475	75.7179	9.70947e-06	0.000110302
bioD	3.3138	7.10754	75.6544	9.74332e-06	0.000110389
amiC	-2.07236	7.95042	75.5595	9.7942e-06	0.000110392
gsiD	2.5395	5.02839	75.5566	9.79577e-06	0.000110392
mltF	-1.89536	6.19336	75.4137	9.87292e-06	0.000110965
sodA	3.24725	10.4364	75.3155	9.92639e-06	0.00011127
secD	-2.10051	9.65732	75.2256	9.97565e-06	0.000111527
yafN	1.76475	6.23363	74.9814	1.0111e-05	0.000112742
raiA	4.13496	9.19314	74.8361	1.01926e-05	0.000112994
ygjK	-2.4892	3.70726	74.8188	1.02023e-05	0.000112994
ptsN	1.90336	6.95823	74.7984	1.02139e-05	0.000112994
nuoE	2.2186	8.39088	74.6689	1.02874e-05	0.000113229
pheT	-2.39702	9.51201	74.6667	1.02887e-05	0.000113229
potE	-2.63888	4.90919	74.3445	1.04746e-05	0.000114788
mprA	1.98286	7.17644	74.3271	1.04847e-05	0.000114788
mliC	2.33581	4.80014	74.063	1.06403e-05	0.000116192
ybjD	-1.795	6.22915	73.9733	1.06938e-05	0.000116444
feaB	-2.01223	5.44929	73.932	1.07186e-05	0.000116444
sdhE	2.22431	7.78288	73.6468	1.08913e-05	0.000117595
nrdR	2.01038	7.08352	73.6394	1.08958e-05	0.000117595
argD	-2.40535	7.02063	73.6195	1.0908e-05	0.000117595
yedD	2.17903	7.25612	73.2198	1.11563e-05	0.000119588
yiiQ	2.12517	4.88396	73.2087	1.11633e-05	0.000119588
xdhD	-2.38497	4.49302	73.1858	1.11778e-05	0.000119588
treB	2.54348	4.74102	73.0721	1.12498e-05	0.000120055
purD	3.24149	10.1072	72.9358	1.1337e-05	0.00012068
pyrE	2.24276	7.41464	72.7021	1.14882e-05	0.000121983
thrB	-1.92301	6.83682	72.5616	1.15804e-05	0.000122359
pncA	2.04164	6.14521	72.56	1.15815e-05	0.000122359
ygaH	2.4032	4.73637	72.3367	1.17298e-05	0.000123341
rpoB	-3.02794	11.9466	72.3322	1.17328e-05	0.000123341
ymjE	2.851	2.05018	72.286	1.17638e-05	0.00012336
argR	1.6895	7.15655	72.2196	1.18085e-05	0.000123522
yajD	1.70705	7.08298	72.0499	1.19237e-05	0.000124202
clpA	-2.5137	10.4855	72.0373	1.19323e-05	0.000124202
hslV	2.6975	7.36985	71.9887	1.19656e-05	0.000124243
fadJ	-1.88424	5.33284	71.9004	1.20264e-05	0.000124567
napA	-2.65765	6.54764	71.8162	1.20846e-05	0.000124771
bcp	2.40525	8.71315	71.7868	1.21051e-05	0.000124771
trpR	1.74514	6.22756	71.5267	1.22877e-05	0.000126345
yciI	2.79461	6.09991	71.4512	1.23413e-05	0.000126588
dhaL	1.49364	5.99045	71.0571	1.26258e-05	0.000128668
yjiR	-2.16914	6.71718	71.055	1.26274e-05	0.000128668
ybeM	-2.07274	5.4335	71.0184	1.26542e-05	0.000128668
fucO	-2.67971	4.31544	70.9862	1.26779e-05	0.000128668
cobT	-1.83588	6.82139	70.9612	1.26963e-05	0.000128668
ycaI	-2.00709	5.1408	70.8406	1.27856e-05	0.000128821
dut	2.14462	6.67592	70.8283	1.27947e-05	0.000128821
ymgL	3.42298	2.29266	70.8175	1.28028e-05	0.000128821
udk	1.84709	6.19466	70.4544	1.30767e-05	0.000131264
hxpB	2.10963	5.3533	70.387	1.31283e-05	0.00013147
ftsK	-2.09555	8.70439	70.112	1.33415e-05	0.000133289
msrB	1.77996	7.69997	70.0474	1.33922e-05	0.00013348
cyoD	2.02405	9.23254	69.9379	1.34788e-05	0.000134027
bcsC	-1.74711	5.8407	69.6807	1.36846e-05	0.000135754
rne	-1.98218	8.91184	69.5928	1.37558e-05	0.000136119
yjhV	2.53827	3.55999	69.5415	1.37976e-05	0.000136119
oppA	-2.47078	10.9989	69.5164	1.3818e-05	0.000136119
nth	2.61902	4.39965	69.4082	1.39068e-05	0.000136446
nusA	-2.33894	10.8462	69.3972	1.39159e-05	0.000136446
mgsA	2.03061	7.51932	69.2236	1.40599e-05	0.000137539
ydcJ	-1.96525	4.40062	69.042	1.42125e-05	0.000138711
mtlA	-2.00097	6.61031	68.9483	1.4292e-05	0.000139166
fryA	-2.49964	3.69337	68.8918	1.43402e-05	0.000139314
ygaM	2.33222	6.87743	68.849	1.43768e-05	0.00013935
yidI	2.25696	4.22852	68.8056	1.44141e-05	0.000139391
allC	-2.15539	4.14419	68.7379	1.44724e-05	0.000139636
yihG	1.83855	5.34695	68.5098	1.46713e-05	0.000141036
dapE	-1.69173	7.62305	68.495	1.46843e-05	0.000141036
yjgR	-1.70521	6.40786	68.3095	1.48488e-05	0.000142292
tpiA	2.27323	9.52035	68.1686	1.4975e-05	0.000142858
ynfA	2.02975	3.53746	68.1305	1.50094e-05	0.000142858
yjeO	1.96751	4.47316	68.0949	1.50416e-05	0.000142858
ppsR	1.96575	4.33796	68.0934	1.5043e-05	0.000142858
kefB	-1.82943	6.36375	68.0039	1.51244e-05	0.000143309
gfcD	-2.08311	4.00522	67.8931	1.52259e-05	0.000143948
purE	3.06317	9.01543	67.8332	1.52811e-05	0.000144147
tilS	-1.56558	7.04495	67.7658	1.53435e-05	0.000144414
ribE	1.95806	7.50788	67.7269	1.53797e-05	0.000144432
rsxA	1.83507	5.43727	67.6775	1.54257e-05	0.000144468
mcbA	2.6039	2.62674	67.6496	1.54519e-05	0.000144468
tonB	1.97408	7.94898	67.5001	1.55926e-05	0.000145462
yjbE	4.036	4.65885	67.3808	1.5706e-05	0.000146198
fabA	2.53775	9.79866	67.2464	1.58351e-05	0.000146868
rtcB	-1.83749	4.9132	67.2334	1.58476e-05	0.000146868
nfrA	-2.35031	5.64725	66.863	1.62102e-05	0.000149764
yjgA	2.03193	8.38241	66.8035	1.62694e-05	0.000149764
fepC	2.73848	5.25802	66.7853	1.62875e-05	0.000149764
frmB	-1.93155	7.37548	66.7711	1.63018e-05	0.000149764
dcuA	-1.9283	7.21051	66.6911	1.63819e-05	0.000149988
gcvR	1.68455	5.88859	66.676	1.63971e-05	0.000149988
arnF	-1.96971	5.52024	66.6159	1.64577e-05	0.000150217
gcvH	3.0546	9.33621	66.5578	1.65166e-05	0.00015043
hicA	2.67155	1.72192	66.3985	1.66794e-05	0.000151499
pqiC	1.68921	6.3825	66.3728	1.67058e-05	0.000151499
aegA	-2.51673	4.77353	66.3007	1.67802e-05	0.000151635
aidB	-2.39459	6.43224	66.2888	1.67925e-05	0.000151635
blr	2.1869	4.44681	66.1322	1.69558e-05	0.000152757
pepA	-1.91637	8.83537	66.1006	1.6989e-05	0.000152757
ucpA	-1.67973	7.27061	66.0549	1.70371e-05	0.000152864
gadB	-3.18366	7.13959	65.945	1.71535e-05	0.000153582
ydcA	2.02559	3.76742	65.7651	1.73461e-05	0.000154978
yhdT	2.99936	4.23989	65.6594	1.74605e-05	0.000155671
glrK	-1.81699	6.30908	65.5984	1.75269e-05	0.000155934
gadA	-3.49676	7.65486	65.5056	1.76285e-05	0.000156509
ynbE	1.67186	3.75979	65.2769	1.78822e-05	0.000158428
feoB	-2.14748	7.08135	65.2348	1.79293e-05	0.000158482
yccS	-1.69408	6.51153	65.2046	1.79632e-05	0.000158482
fxsA	3.32065	5.45716	65.0191	1.81734e-05	0.000160002
hupB	2.35053	9.66275	64.932	1.8273e-05	0.000160544
rmf	3.23973	8.46659	64.8244	1.83971e-05	0.000161299
yeeX	3.77725	9.87922	64.6976	1.85447e-05	0.000162256
ygiF	-1.55482	7.18431	64.4056	1.889e-05	0.000164937
rcsD	-1.85321	7.88503	64.1704	1.91738e-05	0.000167069
fldA	2.26092	8.4206	64.0272	1.93491e-05	0.000167975
lipB	2.16084	6.4222	64.0206	1.93573e-05	0.000167975
minE	1.69136	7.21815	63.9008	1.95056e-05	0.000168915
ydiH	3.86848	6.01265	63.8421	1.95787e-05	0.000169201
yeeO	-2.37729	4.73513	63.7686	1.96707e-05	0.000169395
ppiD	-1.832	9.4686	63.7602	1.96813e-05	0.000169395
insO	-2.03175	5.34451	63.6941	1.97647e-05	0.000169748
ydbD	-3.19101	4.64827	63.6641	1.98026e-05	0.000169748
yhfG	1.92283	3.96389	63.378	2.01691e-05	0.000172539
yjcB	1.94861	7.6802	63.3277	2.02343e-05	0.000172748
pitA	-1.95211	9.3078	63.2013	2.03995e-05	0.000173807
parC	-1.65972	8.18241	63.1545	2.04611e-05	0.000173827
yhiI	-2.90346	8.61304	63.137	2.04841e-05	0.000173827
edd	-1.90343	6.39752	63.0991	2.05342e-05	0.000173903
nrdH	5.76216	4.40888	63.0101	2.06524e-05	0.000174554
yhbQ	1.73593	5.40864	62.9684	2.07081e-05	0.000174675
folE	2.77311	7.65811	62.8652	2.08467e-05	0.0001753
yobD	2.38919	3.59106	62.8516	2.08651e-05	0.0001753
mdfA	-1.61044	6.3456	62.7873	2.09521e-05	0.000175405
zntB	-1.72396	6.19326	62.7709	2.09743e-05	0.000175405
tyrA	-1.74812	7.39552	62.7504	2.10021e-05	0.000175405
rsmH	-1.80781	8.51511	62.7169	2.10479e-05	0.00017544
ibpB	7.46654	7.58449	62.5594	2.12641e-05	0.000176894
xanP	2.5396	8.82596	62.4458	2.14216e-05	0.000177854
bdm	4.05382	2.50537	62.3668	2.15321e-05	0.000178421
tusB	2.62346	4.93259	62.1927	2.17779e-05	0.000179862
lptD	-2.10629	9.14997	62.1835	2.17911e-05	0.000179862
cueO	-2.24654	7.68672	62.139	2.18544e-05	0.000180033
ydbJ	1.5102	6.31458	62.1072	2.19e-05	0.000180057
cdaR	-2.03997	5.31201	61.7773	2.23785e-05	0.00018343
symE	2.15936	4.1606	61.7564	2.24092e-05	0.00018343
waaU	1.99363	6.46559	61.7352	2.24405e-05	0.00018343
ygiW	1.86145	7.46954	61.6673	2.2541e-05	0.000183896
yjiH	-3.75471	4.96417	61.5593	2.27017e-05	0.000184851
qseC	-1.52568	5.41194	61.4091	2.29277e-05	0.000186332
yigI	1.85256	7.29475	61.2809	2.31228e-05	0.000187557
ptrA	-1.81535	6.88384	61.1971	2.32515e-05	0.000188026
yfaA	-2.27959	4.16042	61.1666	2.32985e-05	0.000188026
metL	-1.69886	7.33939	61.1331	2.33503e-05	0.000188026
dgcQ	-1.54288	5.81677	61.1277	2.33587e-05	0.000188026
yafQ	2.06078	6.8181	60.7027	2.40282e-05	0.00019283
cpdB	-1.94629	5.87128	60.6912	2.40467e-05	0.00019283
yegI	-1.83905	4.22486	60.539	2.42924e-05	0.000193533
sdhD	2.9651	7.98038	60.5273	2.43114e-05	0.000193533
yifN	1.69684	4.88845	60.5169	2.43283e-05	0.000193533
nuoM	2.97038	7.33699	60.5042	2.43491e-05	0.000193533
hflD	2.40006	6.5443	60.4903	2.43716e-05	0.000193533
ulaE	-1.82027	4.51197	60.4673	2.44092e-05	0.000193533
acpP	2.45092	12.0939	60.3007	2.46832e-05	0.00019534
yaeP	1.88765	7.02105	60.2688	2.47361e-05	0.000195392
tsr	-2.27168	4.67576	60.1742	2.48938e-05	0.000196271
yqeB	-2.05788	4.29273	60.1385	2.49537e-05	0.000196376
yidH	1.80222	3.58794	60.0942	2.50282e-05	0.000196539
iraM	2.22979	6.65489	60.0489	2.51046e-05	0.000196539
yccX	1.47867	4.68887	60.0435	2.51138e-05	0.000196539
yeiW	1.67023	4.10793	59.9568	2.52609e-05	0.000197324
dhaR	-2.56504	5.92018	59.9252	2.53148e-05	0.00019738
grxB	1.88681	5.19924	59.7563	2.56053e-05	0.000199278
uup	-1.96663	8.22925	59.7167	2.5674e-05	0.000199328
htrL	2.42757	8.26439	59.6773	2.57426e-05	0.000199328
glcB	-2.16103	6.85346	59.6468	2.57957e-05	0.000199328
corA	-2.13579	8.61929	59.6323	2.58212e-05	0.000199328
ykgO	2.94922	2.33104	59.6172	2.58476e-05	0.000199328
yccA	2.28668	7.43722	59.5016	2.60511e-05	0.000200532
modC	-1.6144	5.82383	59.4541	2.61353e-05	0.000200814
hpt	1.95205	8.3499	59.3793	2.62685e-05	0.000201321
sdaC	1.68689	6.97624	59.3433	2.63329e-05	0.000201321
secY	-2.32662	13.6447	59.337	2.63442e-05	0.000201321
nrdI	4.84958	4.64125	59.2752	2.64552e-05	0.000201718
gadC	-2.5196	6.24776	59.2551	2.64915e-05	0.000201718
ycgB	-1.97617	5.25819	59.1999	2.65914e-05	0.000202114
sapF	1.96787	4.30794	59.1194	2.67378e-05	0.000202862
yjiX	3.56653	2.37615	59.0242	2.69123e-05	0.000203662
ileS	-1.94585	9.77085	59.0094	2.69397e-05	0.000203662
ygdQ	1.41535	6.21798	58.9681	2.70158e-05	0.000203873
xerD	-1.55778	6.99764	58.9055	2.71318e-05	0.000204153
chbC	-2.04732	4.30362	58.8959	2.71496e-05	0.000204153
eutM	2.88687	1.32114	58.7831	2.73604e-05	0.000205114
cspD	2.01282	6.60193	58.7756	2.73745e-05	0.000205114
yjiS	3.19649	1.53779	58.6858	2.75439e-05	0.000206019
yfeO	-1.83541	5.66914	58.5417	2.78182e-05	0.000207671
degQ	-1.46902	6.67038	58.5183	2.78632e-05	0.000207671
tig	-2.25757	11.8787	58.3206	2.82459e-05	0.000210153
narG	-3.56292	5.15281	58.2851	2.83152e-05	0.000210296
dusB	-2.65223	10.6323	58.2599	2.83646e-05	0.000210296
pflA	1.61768	6.62703	58.1358	2.86094e-05	0.000211739
obgE	-1.89122	10.1201	58.0142	2.88515e-05	0.000213158
mhpA	-2.03044	4.92732	57.9694	2.89415e-05	0.00021343
alpA	4.03132	0.807565	57.9457	2.89893e-05	0.00021343
lapB	-1.51115	7.2627	57.9126	2.90559e-05	0.000213548
nlpD	-1.92766	10.218	57.8494	2.9184e-05	0.000214118
sdhC	3.05946	7.75796	57.7565	2.93734e-05	0.000214694
ybeQ	-1.95198	4.37493	57.7508	2.9385e-05	0.000214694
bamE	2.05245	8.91415	57.7362	2.94151e-05	0.000214694
slt	-1.64385	6.72856	57.5972	2.97017e-05	0.000216413
ogt	1.81956	4.40941	57.5461	2.98079e-05	0.000216789
leuS	-1.88783	9.79962	57.5231	2.9856e-05	0.000216789
yhgE	-1.53766	5.15716	57.4466	3.00161e-05	0.000217578
fiu	2.8974	7.06168	57.2984	3.03296e-05	0.000219135
ygeF	3.21556	1.47819	57.296	3.03346e-05	0.000219135
yhdP	-1.59669	6.64191	57.1736	3.05967e-05	0.000220522
asnB	-1.53396	7.28791	57.1577	3.06309e-05	0.000220522
sbcB	-2.21364	7.13083	57.096	3.07642e-05	0.000221105
relA	-2.12654	8.61551	57.0626	3.08365e-05	0.000221248
hrpB	-1.43412	7.0642	56.9135	3.11625e-05	0.000223039
ynjH	1.97791	2.76055	56.8977	3.11972e-05	0.000223039
adiA	-2.14219	5.45839	56.8763	3.12444e-05	0.000223039
dgcJ	-2.24828	5.66048	56.808	3.13956e-05	0.00022374
ybaB	2.40486	8.78849	56.7324	3.15639e-05	0.000224561
fldB	1.52251	7.86998	56.613	3.18321e-05	0.000226088
rpsA	-2.06211	12.9728	56.437	3.22324e-05	0.000228502
purN	2.4438	8.86117	56.383	3.23566e-05	0.000228502
yagF	-2.10718	4.72425	56.3737	3.23781e-05	0.000228502
yojI	-1.50001	7.51069	56.3626	3.24036e-05	0.000228502
copA_1	-2.81994	8.75038	56.3378	3.24609e-05	0.000228502
thyA	2.09575	6.6425	56.3107	3.25235e-05	0.000228502
yodD	1.9545	4.85762	56.2991	3.25505e-05	0.000228502
yneG	1.78479	5.29888	56.1619	3.28705e-05	0.000229999
asmA	-1.50647	7.03729	56.1611	3.28726e-05	0.000229999
rpoA	-2.14845	13.6906	56.113	3.29857e-05	0.000230409
fusA	-2.22492	13.661	56.0084	3.32333e-05	0.000231756
rpsB	-2.44623	12.8107	55.9449	3.33849e-05	0.000232429
bioP	2.88619	7.48653	55.8803	3.35399e-05	0.000232765
rpmB	2.09322	11.1095	55.8788	3.35433e-05	0.000232765
yhaH	1.47065	6.2633	55.7482	3.38595e-05	0.000234574
malZ	-1.45579	5.49194	55.6862	3.40107e-05	0.000235236
ligB	-1.80766	4.16949	55.6539	3.409e-05	0.00023535
ygjP	1.97667	4.55429	55.6341	3.41385e-05	0.00023535
ybbP	-1.66548	4.90399	55.4601	3.45694e-05	0.000237735
yfbR	2.15129	4.36373	55.4491	3.4597e-05	0.000237735
yjjA	1.84559	6.80334	55.1899	3.52521e-05	0.000241054
yjjJ	-2.10141	6.70992	55.1871	3.52592e-05	0.000241054
ftsI	-1.6642	8.0738	55.1722	3.52973e-05	0.000241054
cobS	-1.70481	6.23459	55.168	3.53081e-05	0.000241054
yfbS	-1.60208	5.36863	55.1368	3.53882e-05	0.000241211
yahO	1.63801	7.16805	55.0351	3.56505e-05	0.000242607
ydcR	-1.63825	5.74979	54.9996	3.57426e-05	0.000242843
lplT	-1.57456	6.16661	54.8596	3.61089e-05	0.000244937
yegV	-1.62892	4.33893	54.6531	3.66574e-05	0.00024826
ykgM	2.43327	4.59702	54.5613	3.69044e-05	0.000249533
rimI	1.49616	6.81335	54.3329	3.75282e-05	0.000253345
yehB	-3.95043	4.45964	54.251	3.77548e-05	0.000254468
ycjG	-1.62219	5.99653	54.1667	3.79899e-05	0.000255646
eamA	-1.43877	6.36776	54.0964	3.81873e-05	0.000256565
gsiA	-2.19822	8.11872	54.0373	3.83544e-05	0.000256968
yeiG	2.29751	6.22136	54.0175	3.84106e-05	0.000256968
yfdY	2.02735	4.63655	54.0108	3.84296e-05	0.000256968
dacC	-1.98707	4.39819	53.9658	3.85576e-05	0.000257059
intB	-2.27623	7.94329	53.9632	3.8565e-05	0.000257059
hslR	1.86186	6.25139	53.9381	3.86366e-05	0.000257131
osmE	1.74599	6.67332	53.8956	3.87583e-05	0.000257536
ihfA	1.77703	9.83711	53.8466	3.88991e-05	0.000258065
gloB	1.47294	5.26586	53.7503	3.91779e-05	0.000259507
rluA	2.01014	6.73854	53.6883	3.93585e-05	0.000260296
tyrP	-1.77673	6.53418	53.5596	3.9737e-05	0.000262388
ydeI	1.88573	3.29971	53.5105	3.98826e-05	0.000262939
purC	2.45469	9.88938	53.4196	4.01539e-05	0.000264315
sdhB	2.02675	9.08618	53.3757	4.02856e-05	0.00026477
garK	-1.66602	4.78868	53.0284	4.13465e-05	0.00027132
nagE	-2.33744	7.38336	52.9102	4.17156e-05	0.000273109
yedX	2.84891	4.13853	52.8997	4.17483e-05	0.000273109
fepB	2.15162	5.84544	52.833	4.19586e-05	0.000273913
flgK	-2.21828	3.31708	52.8196	4.20009e-05	0.000273913
ompF	-2.78715	10.9938	52.6434	4.25628e-05	0.00027715
rpsO	2.05684	11.8677	52.606	4.26835e-05	0.000277508
dsbA	2.07467	8.68487	52.5616	4.2827e-05	0.000278014
yagH	-1.71314	4.67101	52.5171	4.29716e-05	0.000278104
ytjA	1.60848	7.69449	52.5167	4.29726e-05	0.000278104
greB	1.44614	4.6879	52.4471	4.31998e-05	0.000279147
syd	1.46274	6.11186	52.4258	4.32698e-05	0.000279173
ilvA	-1.54552	6.34184	52.3773	4.34293e-05	0.00027938
yddA	2.06911	3.31697	52.3758	4.34341e-05	0.00027938
cdsA	-1.6294	8.378	52.2968	4.36953e-05	0.000280554
dcuR	1.60804	4.7785	52.2728	4.37753e-05	0.000280554
hemG	1.28711	6.51513	52.2606	4.38158e-05	0.000280554
rfaH	1.65252	6.31246	52.1661	4.41319e-05	0.00028215
tynA	-2.01931	3.41239	52.1426	4.4211e-05	0.000282164
pheA	-1.43021	6.44114	52.1258	4.42676e-05	0.000282164
rlmA	1.52035	6.39203	52.1036	4.43427e-05	0.000282217
yhfL	3.09538	2.28845	52.0164	4.46387e-05	0.000283674
malT	-1.62499	7.23547	51.9612	4.48272e-05	0.000284444
nfsB	2.15523	7.8168	51.8941	4.50577e-05	0.000285478
yjjZ	3.92719	6.97192	51.8404	4.52434e-05	0.000286225
glgP	-1.78268	7.81262	51.7673	4.54973e-05	0.00028729
ymgM	2.03252	4.14673	51.7529	4.55476e-05	0.00028729
yfaQ	-2.20581	3.75261	51.7229	4.56525e-05	0.000287522
ycjT	-2.23091	3.21647	51.63	4.5979e-05	0.000288584
norR	-1.81499	5.8052	51.6271	4.59895e-05	0.000288584
torD	-1.68529	4.23701	51.596	4.60996e-05	0.000288584
tomB	2.4796	7.41238	51.5784	4.61618e-05	0.000288584
bepA	-1.3397	6.76812	51.5782	4.61625e-05	0.000288584
folD	2.45266	7.40204	51.4105	4.67624e-05	0.000291902
hybC	-2.06751	6.34875	51.3082	4.71334e-05	0.000293581
rseP	-1.69196	9.52664	51.2981	4.71702e-05	0.000293581
ydiJ	-1.71957	7.23521	51.2475	4.73549e-05	0.000294297
yhhQ	-2.14473	5.18358	51.1804	4.76012e-05	0.000295393
kch	-1.40968	5.50056	51.0297	4.81607e-05	0.000298027
garD	-2.51314	3.95842	51.0281	4.81666e-05	0.000298027
yccM	-2.37497	4.62829	50.9984	4.82778e-05	0.000298278
acrD	-1.88055	5.05606	50.9196	4.85741e-05	0.00029967
yeeY	-1.6378	5.92769	50.8307	4.89114e-05	0.000300954
iap	-1.83975	7.0574	50.8273	4.89246e-05	0.000300954
def	1.72912	8.71654	50.7618	4.91746e-05	0.000302052
ychO	-1.809	5.56815	50.7094	4.93761e-05	0.000302849
ytfH	1.5057	4.58284	50.6719	4.95209e-05	0.000303194
ychS	3.11623	4.69365	50.6577	4.95757e-05	0.000303194
ibpA	4.95527	7.25306	50.6195	4.97239e-05	0.000303661
argA	-2.589	5.87239	50.582	4.987e-05	0.000304114
thrS	-1.6761	10.5797	50.5581	4.99631e-05	0.000304242
gltB	-3.11825	8.4711	50.5099	5.01519e-05	0.000304662
treC	2.21041	3.55067	50.5037	5.01763e-05	0.000304662
sapD	1.61316	5.08385	50.485	5.02499e-05	0.000304671
yhbE	-1.50322	9.46807	50.4533	5.03751e-05	0.000304993
ybaY	1.67377	6.8961	50.3885	5.06315e-05	0.000306107
abpA	-1.40979	5.74997	50.2501	5.1185e-05	0.000308704
glpE	1.68152	7.73838	50.2446	5.12072e-05	0.000308704
dtpD	-2.27609	4.57536	50.1358	5.16475e-05	0.000310484
yjcE	-1.5413	6.53044	50.1354	5.16493e-05	0.000310484
ortT	2.76643	4.6456	50.0774	5.1886e-05	0.000311451
ybdR	-1.64204	4.25967	50.0599	5.19576e-05	0.000311451
rffC	1.47095	6.11948	49.9116	5.257e-05	0.000314675
glmM	-1.7632	9.24369	49.7671	5.3175e-05	0.000317847
yrhB	2.59195	2.69971	49.733	5.33188e-05	0.000317887
mrcB	-1.52115	8.12716	49.7169	5.33872e-05	0.000317887
dadA	-1.57403	8.75504	49.7121	5.34075e-05	0.000317887
deaD	-2.41952	10.9225	49.6865	5.35161e-05	0.000318086
yfiE	-1.59446	4.68486	49.5882	5.39357e-05	0.00032013
fadE	-2.16135	5.85152	49.5108	5.42691e-05	0.000321403
tusC	2.15755	5.41051	49.4991	5.43199e-05	0.000321403
insD-3	-1.43704	5.11844	49.4856	5.43784e-05	0.000321403
nudG	1.78835	4.0066	49.3561	5.49429e-05	0.000324286
lfhA	-1.96333	4.8308	49.3003	5.51883e-05	0.00032528
fes	2.65034	5.6344	49.2579	5.53759e-05	0.000325931
bcsA	-2.03512	5.26649	49.0927	5.61138e-05	0.000329815
purH	3.05614	9.66995	49.016	5.64605e-05	0.000331392
trmL	1.63957	5.70453	48.8684	5.71347e-05	0.000334884
tusD	1.81007	6.44971	48.7119	5.78604e-05	0.000338667
intS	-1.68641	5.68159	48.6606	5.8101e-05	0.000339605
uspG	1.78637	6.92692	48.6274	5.82571e-05	0.000339716
ptsH	2.26554	8.88593	48.6155	5.83134e-05	0.000339716
efp	1.81661	9.52485	48.6054	5.83611e-05	0.000339716
ydcS	-2.1116	3.95178	48.5411	5.86654e-05	0.000341018
yhhL	1.52566	4.79966	48.3192	5.97318e-05	0.00034674
rimO	1.9098	6.31287	48.2951	5.98491e-05	0.000346944
mmuM	-1.3386	5.68695	48.2116	6.02574e-05	0.000348482
cysZ	1.60157	5.68105	48.2071	6.02794e-05	0.000348482
ssb	1.51455	8.31167	48.1079	6.07692e-05	0.000350834
yehI	-2.12901	3.82856	48.0304	6.11549e-05	0.00035258
ykgS	2.21326	2.38791	47.8759	6.19335e-05	0.000356581
btsT	2.36025	4.88792	47.8285	6.21748e-05	0.000357147
agp	-1.44426	5.32392	47.8234	6.22007e-05	0.000357147
yfeW	-1.62608	4.17427	47.7691	6.24788e-05	0.000358257
soxR	1.9496	4.64661	47.739	6.26334e-05	0.000358301
fur	1.6261	9.74449	47.7346	6.2656e-05	0.000358301
yaiA	1.53461	7.14137	47.6441	6.31239e-05	0.000360422
potG	-1.7592	4.93563	47.63	6.31975e-05	0.000360422
cirA	2.73437	8.4626	47.4918	6.39215e-05	0.000364059
nrdF	4.24191	4.47075	47.4444	6.41721e-05	0.000364995
thpR	1.41265	4.61245	47.2573	6.51735e-05	0.000370193
insZ	-1.56915	4.36763	47.1938	6.55178e-05	0.00037124
nudL	1.3636	4.82282	47.1909	6.55336e-05	0.00037124
betT	-2.24243	7.73014	47.1526	6.57424e-05	0.000371924
yeaE	-1.54642	5.01903	47.0398	6.63615e-05	0.000374562
insD-4	-1.50418	5.08726	47.0354	6.6386e-05	0.000374562
yidB	1.55291	5.48853	46.7298	6.81006e-05	0.000383724
ygaV	1.77565	3.39682	46.6944	6.8303e-05	0.000384165
ykgV	2.28421	3.43087	46.6843	6.83607e-05	0.000384165
ygiB	1.71166	7.13061	46.6666	6.84625e-05	0.000384226
polA	-1.61907	7.92293	46.6224	6.8716e-05	0.000385138
pdeN	-1.87717	5.34252	46.5604	6.9075e-05	0.000386637
fepG	2.2093	4.63041	46.5211	6.93031e-05	0.000387401
speF	-2.46656	3.77792	46.4932	6.94656e-05	0.000387796
ybiV	1.55087	6.03822	46.3314	7.04183e-05	0.000392093
hsdR	-1.44557	6.56554	46.331	7.04208e-05	0.000392093
elfG	-1.73881	4.32588	46.2952	7.06334e-05	0.000392759
yaiI	1.95663	5.65215	46.2642	7.08184e-05	0.00039327
rimM	-1.85113	12.7945	46.1617	7.14345e-05	0.000396171
rnt	1.83146	4.5017	46.1153	7.17157e-05	0.000397209
recE	-2.13482	3.35718	46.0603	7.20504e-05	0.000398541
kdpD	-1.70459	6.07008	45.7811	7.37791e-05	0.000406483
dcrB	2.12488	8.59793	45.7786	7.37952e-05	0.000406483
yejG	1.77928	8.97456	45.7755	7.38146e-05	0.000406483
entS	1.76612	6.30759	45.7665	7.3871e-05	0.000406483
hslJ	2.12494	7.66814	45.6732	7.44612e-05	0.000409198
yccF	1.66599	5.11203	45.6494	7.46129e-05	0.000409499
ybiO	-1.66346	4.39965	45.5334	7.53562e-05	0.000413042
ybjC	1.43536	4.67946	45.4513	7.58874e-05	0.000415415
rof	1.67549	6.82876	45.4131	7.61363e-05	0.000416091
mnmC	-1.33413	6.39758	45.4022	7.62079e-05	0.000416091
atpE	2.1378	11.197	45.3532	7.65285e-05	0.000417302
livH	-1.77736	3.9071	45.3176	7.6763e-05	0.000418042
tdcE	-1.66539	3.91115	45.2522	7.71957e-05	0.000419411
aceB	-2.38435	5.86197	45.2496	7.7213e-05	0.000419411
ycaP	-1.49647	5.01332	45.1285	7.8022e-05	0.000423262
yedS	-1.86992	5.00177	45.1067	7.81695e-05	0.000423518
frlR	1.33124	4.55861	45.0397	7.86227e-05	0.000425428
grpE	2.5124	9.73565	44.9961	7.89194e-05	0.000426487
valS	-1.84488	9.06341	44.9625	7.91486e-05	0.00042718
insD-6	-1.5345	5.05052	44.8974	7.95959e-05	0.00042821
cbpA	-1.44516	6.63526	44.8907	7.96417e-05	0.00042821
aaeB	-1.83895	4.85265	44.8824	7.96991e-05	0.00042821
yibF	1.97213	5.59508	44.8758	7.97447e-05	0.00042821
ytiA	1.84219	2.24954	44.8383	8.00046e-05	0.000428816
yphH	-1.78504	5.20863	44.8302	8.00605e-05	0.000428816
dld	-1.46293	7.01687	44.7341	8.07306e-05	0.000431858
yajG	1.55787	7.63592	44.6889	8.10489e-05	0.00043264
trpC	-1.7023	6.33245	44.6842	8.10815e-05	0.00043264
hipA	-2.01121	4.85998	44.6674	8.12004e-05	0.000432728
bssS	1.92114	8.23217	44.5417	8.20935e-05	0.000436936
pxpC	-1.39692	7.21711	44.5097	8.23234e-05	0.00043724
rtcR	-1.66611	5.64162	44.5049	8.23576e-05	0.00043724
yefM	1.78403	6.24257	44.3751	8.32965e-05	0.00044167
ydhR	2.58414	7.83539	44.3478	8.34956e-05	0.000442171
lipA	1.62843	7.93518	44.3257	8.3657e-05	0.000442471
clpS	1.57887	6.59327	44.2836	8.39662e-05	0.000443551
ftsH	-1.54422	10.738	44.1969	8.46072e-05	0.000446379
yoeA	-1.36559	5.76017	44.1749	8.47701e-05	0.000446682
yrdA	1.38735	7.19208	44.068	8.55701e-05	0.000450335
kdgK	-1.90979	7.25467	44.0479	8.57218e-05	0.000450572
hybG	1.59694	4.3971	43.879	8.70076e-05	0.000456396
yhhA	1.24691	5.33417	43.8654	8.71123e-05	0.000456396
arcB	-1.63241	7.43631	43.86	8.71536e-05	0.000456396
uraA	-2.54298	6.83463	43.8223	8.74446e-05	0.000457352
ynaL	2.25326	1.26369	43.7954	8.76526e-05	0.000457874
grxC	1.94955	7.61898	43.6796	8.85555e-05	0.000462019
emrE	1.73116	5.54956	43.5164	8.98478e-05	0.000468183
lpoA	-1.37227	6.60186	43.4914	9.00472e-05	0.000468645
xisD	2.53995	1.7788	43.4081	9.07178e-05	0.000471554
luxS	1.82072	8.74896	43.3822	9.0927e-05	0.000472061
pdeL	-3.29426	9.23769	43.3177	9.14518e-05	0.000473986
rpoS	-2.07246	10.6005	43.3091	9.15222e-05	0.000473986
ebgA	-2.19364	3.17005	43.2928	9.16553e-05	0.000474095
ftsA	-1.40018	9.26549	43.2414	9.20775e-05	0.000475696
ybgE	2.00612	5.4485	43.2227	9.22314e-05	0.00047591
yhfY	2.30515	2.94663	43.1675	9.26878e-05	0.000477681
livG	-1.57473	4.03063	43.0118	9.39902e-05	0.000483803
barA	-1.38573	4.93607	42.9794	9.42643e-05	0.000484624
insD-5	-1.50085	5.03469	42.9454	9.4553e-05	0.000485517
sufE	2.75482	3.80511	42.89	9.50249e-05	0.000487348
argS	-1.45941	8.85372	42.7858	9.59211e-05	0.000491349
ycdZ	1.38219	6.69116	42.7156	9.65311e-05	0.000493875
ompT	-2.05648	12.0318	42.3747	9.95583e-05	0.000508747
nusB	1.9844	7.96327	42.3247	0.000100012	0.000509403
yedI	-1.29911	6.45436	42.3221	0.000100036	0.000509403
ccmG	1.34343	3.92803	42.3208	0.000100048	0.000509403
ybfO	-2.18086	4.0797	42.2262	0.000100913	0.000513189
ydgI	-1.38477	5.90476	42.144	0.000101673	0.000516432
yeaG	-2.2449	7.17117	42.1246	0.000101854	0.000516729
yphG	-2.25687	3.36714	42.1045	0.000102041	0.000517057
insD-2	-1.50946	5.13308	42.0779	0.00010229	0.000517672
argG	-3.29106	8.33575	42.0653	0.000102407	0.000517672
slyD	1.9034	10.458	42.0216	0.000102818	0.000519119
yodC	1.27867	5.2614	41.994	0.000103078	0.000519119
dgt	-1.46778	5.83037	41.9852	0.000103162	0.000519119
yahB	-2.08167	6.65707	41.9713	0.000103293	0.000519119
dsbB	1.50276	6.71766	41.9697	0.000103308	0.000519119
insH-6	-2.0689	3.95801	41.9276	0.000103707	0.000520506
yhaB	3.02435	1.32954	41.8387	0.000104558	0.000524152
ftsY	-1.38927	8.80011	41.8121	0.000104813	0.000524809
ydcD	1.69066	4.1722	41.7775	0.000105148	0.000525862
mscL	1.6382	7.10579	41.6306	0.00010658	0.000532394
ydfE	-3.66666	4.21172	41.6164	0.00010672	0.000532467
uvrA	-1.63337	8.2857	41.5875	0.000107005	0.00053326
ydhP	-1.41119	5.97063	41.5437	0.000107439	0.000534791
rnr	-2.38786	9.22921	41.3065	0.000109826	0.000546027
yncE	1.77997	9.24889	41.2145	0.00011077	0.000549755
otsA	-1.28637	5.95807	41.2081	0.000110836	0.000549755
yafP	1.53703	5.61675	41.1946	0.000110975	0.00054976
zapB	1.73043	9.61617	41.1828	0.000111097	0.00054976
opgD	-1.23588	6.95423	41.1649	0.000111282	0.000550035
gudX	-1.71919	3.38013	41.138	0.000111561	0.000550581
alsR	1.21972	5.56776	41.1291	0.000111654	0.000550581
yedJ	-1.44402	7.49188	41.0078	0.000112925	0.000556167
yadG	-1.28434	6.64889	40.9929	0.000113083	0.000556167
rayT	1.51227	4.90004	40.9835	0.000113181	0.000556167
flhA	-2.12545	3.61314	40.9367	0.000113679	0.000557962
sad	-1.33096	5.68464	40.8962	0.00011411	0.000559429
fhuD	1.80641	6.79043	40.8066	0.000115073	0.000563496
ycaC	1.95869	5.72636	40.7804	0.000115356	0.000563607
yghJ	-1.46218	6.46812	40.7798	0.000115362	0.000563607
ydhS	-1.49228	4.33775	40.758	0.000115599	0.00056387
fhuC	1.6873	6.76284	40.7503	0.000115683	0.00056387
ydeE	-1.55513	4.41781	40.7348	0.00011585	0.000564037
yciB	1.20313	6.30207	40.4021	0.000119543	0.000581345
djlC	-1.88046	4.46485	40.3763	0.000119834	0.000582091
cvrA	-2.1513	5.99489	40.3422	0.000120222	0.000583088
nrdB	2.11999	8.52961	40.334	0.000120315	0.000583088
dpiB	-1.47748	5.28016	40.2763	0.000120975	0.000584701
yoeB	2.00167	6.38094	40.2716	0.000121029	0.000584701
yigL	1.416	6.74626	40.2687	0.000121063	0.000584701
gsiC	1.72707	5.27918	40.1659	0.000122251	0.000589763
ilvC	-1.74913	5.87163	40.1235	0.000122744	0.000591469
decR	1.50264	4.9134	40.0839	0.000123208	0.000592434
yniB	1.24282	6.07835	40.0824	0.000123225	0.000592434
mlaE	-1.31798	8.08961	40.0548	0.000123551	0.000592914
nuoL	1.90068	7.92142	40.0386	0.000123741	0.000592914
fepA	1.51825	7.36965	40.0382	0.000123746	0.000592914
rnlB	1.42233	6.98326	39.9801	0.000124433	0.00059553
rplA	-2.0023	12.9881	39.9293	0.000125039	0.000597753
creB	-1.18774	6.36621	39.801	0.000126583	0.00060445
glpX	1.37942	6.66922	39.7758	0.000126888	0.000605226
ycgR	-1.54556	4.8912	39.7131	0.000127654	0.000608193
crfC	-2.21014	4.84365	39.7012	0.0001278	0.0006082
ybgA	2.26992	3.35766	39.689	0.000127949	0.000608227
sucD	1.97992	9.61898	39.6456	0.000128484	0.000610085
ygfT	-2.21478	3.61292	39.6073	0.000128958	0.000611648
ybhQ	1.57793	5.44567	39.5395	0.000129802	0.000614961
udp	2.32872	7.54482	39.5118	0.000130149	0.000615912
cyuA	-1.60937	5.205	39.4504	0.000130922	0.000618876
hemC	1.57898	6.83218	39.4367	0.000131095	0.000619004
ygeV	-1.76071	3.70927	39.4205	0.000131301	0.000619283
bioA	2.32661	7.45272	39.3873	0.000131722	0.000620578
ypeC	1.61234	6.82028	39.3354	0.000132385	0.000622646
rnpA	2.56312	8.14302	39.3299	0.000132456	0.000622646
aaeX	1.7128	3.14047	39.2785	0.000133116	0.000625056
qmcA	-1.4688	5.8283	39.1461	0.000134836	0.000632429
uxaC	-1.76307	4.36551	39.1226	0.000135144	0.00063317
zapA	1.43279	8.7888	39.039	0.000136248	0.000637635
fepE	1.97806	3.24441	38.9677	0.000137198	0.000641369
yidA	1.69813	6.29389	38.9385	0.000137589	0.000642486
modF	-1.4177	5.62346	38.8592	0.000138658	0.000646765
lptF	-1.27409	8.11776	38.6788	0.000141128	0.000657252
ybiW	-1.64687	3.38444	38.6724	0.000141217	0.000657252
rcnB	1.21558	6.93961	38.5704	0.00014264	0.000663142
gltP	-1.46886	7.49952	38.4388	0.0001445	0.000671052
groS	3.14208	9.30871	38.4144	0.000144848	0.00067193
serA	-1.81468	9.33711	38.3949	0.000145127	0.000672487
livM	-1.75607	4.31603	38.3215	0.000146182	0.000676634
hyfB	-1.96707	2.92097	38.2501	0.000147219	0.000680688
tolQ	-1.4938	8.50638	38.1558	0.000148601	0.000686325
melA	-1.46149	3.96557	38.0235	0.000150567	0.000694647
tisB	-2.21505	2.71929	37.9738	0.000151313	0.000697327
ygfK	-1.82943	3.44139	37.9242	0.000152064	0.000699811
pfkB	1.75604	6.20212	37.9163	0.000152183	0.000699811
ansA	1.48128	5.78699	37.8911	0.000152566	0.000700088
ytfK	2.04706	7.56453	37.8905	0.000152575	0.000700088
yedE	-2.46965	4.50288	37.8527	0.000153152	0.000701512
ybdD	1.54815	3.06435	37.8485	0.000153217	0.000701512
livJ	-1.3389	5.70049	37.8176	0.00015369	0.000702917
ykgL	1.88006	5.4378	37.7278	0.000155077	0.000707747
ybcW	2.30092	2.9216	37.7275	0.000155081	0.000707747
nudE	1.44224	8.44091	37.6941	0.000155602	0.000709356
fhuF	1.46131	8.02915	37.648	0.000156322	0.00071187
rclB	2.37825	3.38326	37.5858	0.000157302	0.000715561
yebT	-1.34068	6.07151	37.5369	0.000158077	0.000718313
rsmA	1.66504	7.95792	37.4842	0.000158916	0.000721354
yagB	1.76985	4.74843	37.4521	0.000159432	0.000722917
yhcD	-1.72077	5.12538	37.4178	0.000159983	0.000724641
yaiX	-2.65074	4.3037	37.2985	0.000161921	0.000732631
amyA	-1.25702	6.44116	37.1886	0.000163732	0.000739202
yddM	1.74919	5.60536	37.1831	0.000163823	0.000739202
ghxP	-1.44541	8.34401	37.1786	0.000163898	0.000739202
aslB	-1.90718	4.22222	37.1208	0.000164862	0.00074232
yfdG	1.54615	7.22241	37.11	0.000165042	0.00074232
smf	-1.13019	6.02709	37.1005	0.000165202	0.00074232
metR	1.59793	4.86654	37.0951	0.000165292	0.00074232
insA-7	1.45712	5.28587	37.0576	0.000165924	0.000744366
pflD	-1.57287	3.61715	37.0213	0.000166536	0.000745831
ftsB	1.1619	7.52064	37.0174	0.000166603	0.000745831
ycfH	1.31764	6.358	36.9652	0.00016749	0.000747819
narZ	-1.95422	3.06648	36.963	0.000167528	0.000747819
yghB	1.16235	5.48135	36.9519	0.000167717	0.000747819
narH	-1.84476	4.19427	36.945	0.000167836	0.000747819
hscC	-1.71288	3.7496	36.9393	0.000167932	0.000747819
ynfS	-4.66906	1.738	36.8405	0.000169633	0.000753776
metC	-1.35052	5.11251	36.8402	0.000169638	0.000753776
scpA	-1.60544	3.82281	36.8306	0.000169805	0.000753776
yidX	1.39935	4.8494	36.7643	0.000170959	0.000758105
yicH	-1.40107	7.01323	36.7488	0.000171231	0.000758512
yeeE	-2.58646	10.3474	36.711	0.000171894	0.000760656
ytiD	2.78428	5.67356	36.6751	0.000172528	0.000760743
ampH	-1.18	5.62282	36.6743	0.000172542	0.000760743
uhpT	2.47129	4.46475	36.6619	0.000172762	0.000760743
yncJ	3.19866	4.10303	36.6608	0.00017278	0.000760743
guaA	1.67385	10.2095	36.6589	0.000172814	0.000760743
nudK	1.87001	5.80209	36.6487	0.000172996	0.000760752
ybhJ	-2.05069	4.30169	36.6004	0.000173854	0.000763729
uxaA	-1.69157	4.90476	36.5822	0.00017418	0.000764367
allB	-2.25592	3.46193	36.4856	0.000175919	0.000771198
chaB	1.4658	3.24332	36.4611	0.000176364	0.000772012
lacZ	-2.1463	6.5106	36.4552	0.00017647	0.000772012
insD-1	-1.41562	5.00089	36.3391	0.000178596	0.000780504
sapC	1.51176	3.91709	36.3065	0.000179199	0.000781784
appX	-7.59878	2.36291	49.4933	0.000179259	0.000781784
cydD	-1.21525	6.04254	36.2791	0.000179707	0.000782931
frdA	-1.77156	6.74549	36.2443	0.000180354	0.000784939
ybaN	1.51649	5.37024	36.2221	0.000180769	0.000785935
yigZ	1.36826	6.67037	36.1121	0.000182843	0.000794136
puuC	1.46726	4.74563	36.0693	0.000183657	0.000796522
ydjM	2.02731	3.52937	36.0554	0.000183922	0.000796522
yceM	-1.55768	6.29023	36.0535	0.000183958	0.000796522
insB-4	1.0964	5.79065	35.9985	0.000185013	0.000800271
rpsD	-1.7856	12.9424	35.9304	0.000186331	0.000805148
yebO	1.44271	9.33984	35.8795	0.000187322	0.000808604
pspF	-1.79641	4.6257	35.8308	0.000188278	0.000811901
mmuP	-1.45403	4.49376	35.7579	0.000189718	0.000817278
scpC	-1.74268	3.89506	35.5953	0.000192979	0.00083048
ybaE	-1.43391	4.00511	35.5202	0.000194508	0.000836208
sfmD	-2.46839	4.4589	35.4986	0.000194951	0.000837258
yhdU	3.7868	2.55942	35.4119	0.000196741	0.000844087
uhpB	-1.69136	5.64759	35.3833	0.000197335	0.000845778
mlc	-1.33854	5.48639	35.3181	0.000198698	0.000850759
cyaA	-1.31022	8.603	35.2801	0.000199499	0.000852796
tdcC	-1.68087	3.45643	35.2763	0.000199578	0.000852796
livK	-1.83392	4.87487	35.2575	0.000199975	0.000853188
tamA	-1.15744	6.30939	35.2469	0.000200201	0.000853188
pdxY	1.73263	7.09975	35.2395	0.000200356	0.000853188
lomR	-1.94746	3.95268	35.2338	0.000200477	0.000853188
ycbX	-1.23735	6.24597	35.1952	0.000201299	0.000855824
dmsA	-1.80513	3.83492	35.1602	0.000202048	0.000858146
panE	-1.12496	6.813	35.1006	0.000203331	0.000862729
fnr	1.66723	9.06603	35.0698	0.000203998	0.000864689
ilvE	-1.40603	6.75342	35.0556	0.000204306	0.000865128
yfcJ	-1.24038	5.15357	35.0404	0.000204636	0.000865656
malS	-1.45589	3.81621	34.9865	0.000205814	0.000869768
dfp	1.692	6.86721	34.9055	0.000207599	0.000876437
treF	-1.12783	5.31871	34.8657	0.000208482	0.000879285
yciX	1.89348	3.91095	34.7593	0.000210869	0.000888234
gmk	1.22033	8.91745	34.7524	0.000211024	0.000888234
yafX	-1.20113	6.54791	34.7284	0.000211567	0.000889389
fbp	2.19	7.94511	34.7217	0.000211719	0.000889389
holE	1.7356	5.69087	34.5498	0.000215662	0.000903798
der	-1.45246	8.89757	34.5464	0.000215741	0.000903798
yfdI	1.3267	4.15778	34.5443	0.000215791	0.000903798
torY	-2.08916	4.3667	34.5219	0.000216313	0.000905088
ybjQ	1.11946	5.98206	34.458	0.000217806	0.000910434
ldtE	-1.60407	5.5361	34.369	0.000219909	0.00091773
hemD	1.19039	6.30809	34.3606	0.000220109	0.00091773
mazE	1.4694	6.62861	34.3566	0.000220203	0.00091773
znuA	-1.32304	6.46919	34.2794	0.00022205	0.000924517
gspG	2.14596	1.19909	34.1943	0.000224109	0.000930973
moaE	1.65308	7.61727	34.1911	0.000224187	0.000930973
menH	1.72862	4.80666	34.1831	0.000224381	0.000930973
yfjV	-1.39037	5.14361	34.1789	0.000224482	0.000930973
ghoT	2.29225	1.9104	34.144	0.000225335	0.000933595
pbpC	-1.40075	4.89961	34.0627	0.000227337	0.000940964
rplF	-1.7875	13.0773	34.0341	0.000228047	0.00094298
ybfA	2.78168	6.32056	33.8583	0.000232463	0.000960303
ypeB	1.5723	5.18269	33.8264	0.000233277	0.000962724
maa	1.7761	6.51403	33.8017	0.000233907	0.000964382
yddB	1.69704	4.37158	33.7907	0.000234191	0.000964613
yahF	-2.04425	3.67959	33.7623	0.00023492	0.000966673
bioF	1.90291	7.65605	33.7311	0.000235724	0.000969039
ogrK	2.62041	5.4553	33.6944	0.000236676	0.000972006
cysG	-1.09958	6.81536	33.6041	0.000239038	0.000979943
guaC	1.61027	7.68308	33.5963	0.000239244	0.000979943
acs	-1.29676	5.12797	33.594	0.000239305	0.000979943
cusS	-1.26744	5.2615	33.5603	0.000240193	0.000982627
yjjG	1.29842	6.70775	33.5355	0.00024085	0.000984229
entF	2.04859	6.88353	33.528	0.00024105	0.000984229
yjaG	1.22356	7.23171	33.4758	0.000242441	0.000988955
yojO	3.8454	0.243645	33.3721	0.000245236	0.000998614
yphE	-2.39338	3.86396	33.3704	0.000245282	0.000998614
paaK	-1.2481	4.5048	33.3346	0.000246256	0.00100155
yggF	-2.20508	3.45795	33.3252	0.000246513	0.00100155
ycaM	-1.60129	4.38441	33.3179	0.000246713	0.00100155
ydfO	2.64042	2.01192	33.2875	0.000247547	0.00100348
rmuC	-1.40522	6.34368	33.2775	0.000247821	0.00100348
ygfI	-1.3666	4.409	33.2746	0.000247901	0.00100348
pspG	2.62408	3.66712	33.2619	0.000248248	0.00100392
ybhC	-1.26854	4.85824	33.1999	0.000249964	0.00100989
ycbJ	-1.30681	5.46174	33.0897	0.000253048	0.00102091
lysA	-1.87936	5.10958	33.0784	0.000253367	0.00102091
ftp	-1.35376	5.98458	33.0767	0.000253415	0.00102091
yebG	1.4772	8.50991	33.0488	0.000254206	0.00102312
ilvB	-1.73382	5.60054	32.9009	0.000258441	0.00103917
cusB	1.57691	3.39415	32.7312	0.000263408	0.00105814
ybhS	1.25409	3.61032	32.7035	0.000264227	0.00106042
mutL	-1.32019	7.78626	32.6903	0.000264622	0.001061
ynfC	-1.38938	5.57408	32.6716	0.000265179	0.00106222
yfcC	-1.7051	3.96522	32.456	0.000271712	0.00108736
yiiM	1.04154	6.17799	32.4421	0.000272138	0.00108804
prpR	-1.43266	4.33826	32.3732	0.000274271	0.00109553
pdeB	-1.11124	5.78706	32.3212	0.000275896	0.00110098
rffT	1.09708	6.26266	32.2048	0.00027957	0.00111459
cydA	-1.43067	7.23124	32.1401	0.000281641	0.00112178
rtcA	-1.13509	5.28677	32.0763	0.000283697	0.00112891
iaaA	-2.10415	8.86625	32.049	0.000284585	0.00113138
hyfR	-1.47794	3.41839	32.0043	0.000286042	0.0011361
nikR	1.61341	4.39742	31.9537	0.000287704	0.00114163
yggT	1.05538	6.43413	31.9408	0.00028813	0.00114225
yshB	1.69431	2.69691	31.865	0.000290647	0.0011508
torI	2.71067	1.89297	31.8595	0.000290833	0.0011508
modB	-1.30598	5.21702	31.8161	0.000292287	0.00115548
hofQ	-1.35507	3.75964	31.7814	0.000293455	0.00115901
cas3	-2.18933	4.77836	31.7453	0.000294676	0.00116244
argO	-1.04664	5.74001	31.7395	0.000294873	0.00116244
bioB	1.82583	8.13684	31.6957	0.000296368	0.001167
yniA	-1.17896	6.23092	31.6894	0.000296582	0.001167
lrhA	-1.16846	7.12257	31.6331	0.000298515	0.00117351
ygiS	-2.28278	5.90323	31.6121	0.00029924	0.00117473
rsmC	1.25914	7.1034	31.6081	0.00029938	0.00117473
hyfA	-2.34679	2.02094	31.5227	0.000302353	0.00118435
gntT	-1.19208	4.8207	31.5215	0.000302394	0.00118435
glgX	-1.28489	6.8698	31.4874	0.00030359	0.00118794
puuR	1.30635	6.73225	31.4362	0.0003054	0.00119391
rraA	1.3418	8.88344	31.2976	0.000310361	0.00121101
pntA	-1.72177	7.31731	31.2947	0.000310466	0.00121101
amiB	-1.11107	7.47423	31.2901	0.000310633	0.00121101
yjeM	-1.86211	5.30258	31.2518	0.000312026	0.00121532
yhhS	-1.23521	6.24271	31.1727	0.000314919	0.00122546
psiE	1.62345	3.58661	31.1412	0.000316082	0.00122885
casA	-2.32214	5.03029	31.0979	0.000317689	0.00123396
aslA	-1.65956	3.71753	31.0436	0.000319713	0.00124069
tufB	-1.90428	13.791	31.0342	0.000320066	0.00124092
pabC	-1.10321	6.58199	31.0071	0.000321088	0.00124374
dadX	-1.15732	8.03275	30.9913	0.000321682	0.0012449
yihA	1.48673	8.40442	30.9535	0.000323114	0.0012493
ihfB	1.2861	8.94964	30.8331	0.000327726	0.00126597
yahG	-1.7381	3.83055	30.7788	0.000329833	0.00127294
gutM	1.69827	2.10961	30.7514	0.0003309	0.0012759
rffM	1.28682	5.91961	30.7114	0.00033247	0.00128078
acpT	1.18687	5.07422	30.6626	0.000334396	0.00128703
glrR	-1.05834	5.67968	30.645	0.000335095	0.00128855
fruA	-2.18081	6.74478	30.6142	0.000336321	0.00129208
umuC	-1.72598	7.91051	30.6024	0.000336788	0.0012927
smrB	1.01751	6.24837	30.5866	0.000337421	0.00129383
yzgL	1.52584	7.86109	30.5798	0.000337694	0.00129383
nuoN	2.09464	7.7122	30.5459	0.000339056	0.00129787
yfiR	1.27221	5.61428	30.4738	0.000341974	0.00130786
rssA	-1.11772	6.43543	30.4334	0.000343625	0.00131246
ygbN	-1.42028	4.07838	30.4291	0.000343799	0.00131246
ompN	-1.74843	3.57667	30.4193	0.000344201	0.00131277
yddW	-1.20675	4.73244	30.4033	0.000344856	0.00131277
cho	1.32608	5.07086	30.3828	0.000345704	0.00131277
glcA	-1.73698	3.60749	30.38	0.000345817	0.00131277
aroF	-1.33877	7.33915	30.3785	0.000345878	0.00131277
livF	-1.44302	4.46787	30.3751	0.000346022	0.00131277
ybaV	1.07789	4.62247	30.3743	0.000346054	0.00131277
rsfS	1.52697	7.58098	30.3272	0.000348004	0.00131898
yhdJ	-1.45296	3.92679	30.308	0.000348802	0.00132082
metH	-1.82282	7.05774	30.2855	0.000349745	0.00132229
hicB	1.25798	4.18206	30.2838	0.000349816	0.00132229
malX	-1.40851	3.71095	30.2494	0.000351256	0.00132655
ybjL	-1.24528	6.84101	30.2348	0.000351872	0.00132769
proA	-1.22087	8.91883	30.2161	0.000352659	0.00132947
yaeF	-1.2313	4.67019	30.1747	0.000354416	0.0013349
guaB	1.56609	10.5285	30.0714	0.000358838	0.00135013
ahpC	1.58705	10.9692	30.0654	0.000359098	0.00135013
cyoE	1.29342	10.1139	30.0236	0.000360911	0.00135574
yjeJ	-1.4405	5.86559	29.9908	0.000362335	0.00135988
ygfB	1.29244	7.53618	29.8605	0.000368082	0.00137958
dnaG	-1.27967	8.80923	29.857	0.000368236	0.00137958
xanQ	-1.54008	3.12219	29.8205	0.000369867	0.00138446
yraH	1.88326	3.11233	29.7917	0.000371159	0.00138807
yegU	-1.48232	3.83358	29.7642	0.000372401	0.00139148
hisG	-1.14188	6.2218	29.7548	0.000372824	0.00139183
yacL	1.21211	7.49826	29.73	0.000373947	0.00139479
yceQ	1.21459	6.69759	29.6339	0.000378339	0.00140993
yfaV	-2.10625	2.68835	29.6171	0.000379111	0.00141156
recR	1.59119	8.16394	29.602	0.00037981	0.00141292
yeiB	1.55402	5.53926	29.5803	0.000380816	0.00141542
pgsA	1.11789	6.0531	29.5296	0.000383176	0.00142294
nrfA	-1.63952	4.50607	29.4871	0.000385172	0.00142909
uspD	1.12181	6.15002	29.4361	0.000387576	0.00143675
hprS	-1.91043	6.31117	29.3861	0.000389959	0.00144432
yadE	-1.26377	5.83164	29.309	0.000393662	0.00145675
yhfU	2.05137	1.64461	29.3018	0.000394009	0.00145676
chbF	-1.59936	3.75091	29.1979	0.00039907	0.00147419
modE	1.04923	5.51914	29.1709	0.000400399	0.0014778
mepH	1.12429	4.93778	29.144	0.000401731	0.00148143
malY	-1.44845	5.00107	29.123	0.000402772	0.00148229
epmC	1.46673	6.28245	29.1216	0.000402842	0.00148229
putA	-2.01407	6.90887	29.1181	0.000403016	0.00148229
ynaA	-2.29121	4.17926	29.0624	0.000405794	0.0014912
ycdY	1.08935	7.43598	29.049	0.000406467	0.00149238
flgM	1.71284	2.20965	29.0382	0.000407009	0.00149307
yobH	1.2918	6.33215	29.0311	0.000407367	0.00149309
pgaB	-1.74359	3.6018	29.0181	0.000408024	0.0014942
yecR	2.00035	1.72503	29.0063	0.000408619	0.00149509
panZ	1.05585	5.20121	28.98	0.000409952	0.00149866
flgN	1.31897	3.79345	28.9436	0.000411805	0.00150414
murR	-1.90031	3.82299	28.9151	0.000413262	0.00150816
nrdE	2.59876	4.9099	28.8946	0.000414315	0.00151069
mdtO	-1.77764	2.95588	28.8185	0.000418249	0.00152372
gdhA	-1.28035	6.83211	28.7122	0.000423824	0.00154271
ccp	-1.52453	4.59298	28.6957	0.000424694	0.00154454
msbA	-1.25635	7.88268	28.6322	0.000428078	0.00155551
moaC	1.44276	7.28663	28.617	0.00042889	0.00155712
renD	-1.26993	7.88565	28.6051	0.00042953	0.00155811
ythA	2.25747	1.56832	28.5957	0.000430033	0.00155858
gdx	2.03687	7.68369	28.5889	0.000430399	0.00155858
ybgI	-1.20423	7.46801	28.5778	0.000431002	0.00155943
ppiB	1.56358	9.71075	28.4905	0.000435743	0.00157523
yibT	2.09247	6.93613	28.4707	0.000436825	0.0015778
yfhH	-1.25163	4.765	28.3849	0.000441562	0.00159355
phoP	-1.16762	7.45137	28.3283	0.000444721	0.00160358
ubiI	1.13653	6.00491	28.3205	0.000445157	0.00160378
gltD	-2.12631	8.13639	28.3015	0.000446223	0.00160625
pykF	2.52841	9.33913	28.2938	0.00044666	0.00160645
insJ	1.69893	4.81996	28.2793	0.000447475	0.00160802
nepI	1.21779	5.40688	28.2442	0.000449463	0.00161379
clsB	-1.30768	4.1944	28.2297	0.000450287	0.00161537
proB	-1.22423	8.99007	28.223	0.00045067	0.00161538
deoB	-1.18024	8.03052	28.2148	0.000451137	0.00161568
uof	-2.89304	2.52339	28.1033	0.000457549	0.00163726
yicL	-1.62045	6.48033	28.0815	0.000458816	0.0016404
aroB	-1.34458	9.51371	28.0641	0.000459834	0.00164187
sucC	1.66547	9.6167	28.0612	0.000460002	0.00164187
chaC	-1.11275	6.16875	28.038	0.00046136	0.00164394
puuE	1.40382	3.57049	28.038	0.000461361	0.00164394
pal	1.34775	10.8737	27.9778	0.000464902	0.00165516
eptB	-1.50566	6.21337	27.9334	0.000467541	0.00166316
tolA	-1.29004	8.71393	27.8477	0.00047268	0.00168002
menI	1.16506	6.41007	27.7724	0.000477254	0.00169485
selB	-1.03904	7.07599	27.7446	0.000478952	0.00169946
gudD	-1.29034	4.1579	27.7003	0.000481684	0.00170661
potB	1.76894	6.18002	27.6988	0.000481776	0.00170661
fecC	1.88467	5.03411	27.6866	0.000482527	0.00170784
rplE	-1.59435	12.9988	27.6494	0.000484839	0.00171459
yddG	1.90985	2.91045	27.5729	0.000489631	0.00173008
idnT	-1.44486	3.59341	27.5633	0.000490238	0.00173078
nfeF	1.34024	5.28603	27.525	0.000492659	0.00173788
mlaF	-1.10771	8.68864	27.5042	0.000493982	0.00174109
ulaF	-1.27661	4.1907	27.4826	0.00049536	0.00174449
hchA	1.44081	5.29624	27.4591	0.000496865	0.00174833
dhaK	1.0398	6.77044	27.4305	0.000498708	0.00175336
appC	-3.57174	8.90278	27.4122	0.000499886	0.00175604
narQ	-1.2613	5.4757	27.348	0.000504054	0.00176907
narX	-1.27133	5.77358	27.3423	0.000504432	0.00176907
fdx	1.4764	8.44233	27.275	0.000508849	0.00178123
ahpF	-1.45731	9.1016	27.2734	0.00050896	0.00178123
fabI	1.57799	9.22652	27.2703	0.000509164	0.00178123
recJ	-1.02676	7.67112	27.2355	0.00051147	0.00178782
coaD	1.12107	6.46649	27.2225	0.000512335	0.00178835
ispA	1.21405	6.65875	27.2205	0.00051247	0.00178835
dtd	1.04826	7.1835	27.1802	0.000515161	0.00179626
acpS	1.33728	6.11975	27.1692	0.000515896	0.00179734
hisB	-1.12017	5.82031	27.1405	0.000517832	0.0018026
hxpA	1.54774	6.99058	27.1306	0.000518496	0.00180343
sstT	-1.17301	6.48171	27.1219	0.000519088	0.001804
plaP	-2.35934	8.69313	27.1046	0.00052026	0.00180413
gph	1.10058	7.1862	27.104	0.000520298	0.00180413
yfbU	1.40518	6.85486	27.1024	0.000520406	0.00180413
yliM	3.00589	0.402515	27.055	0.000523635	0.00181384
deoC	1.5568	4.93198	27.0292	0.000525405	0.00181848
acrA	-1.08523	8.94845	26.9389	0.00053165	0.00183859
puuP	1.13836	3.58999	26.9151	0.000533311	0.00184282
cdgI	-2.54533	3.78038	26.8398	0.000538609	0.00185864
yicS	1.43047	3.04176	26.8376	0.000538768	0.00185864
ldrD	2.82535	1.96787	26.8314	0.00053921	0.00185865
fkpB	1.31147	7.27617	26.8142	0.000540426	0.00186132
lysC	-1.33401	5.60232	26.749	0.000545088	0.00187585
oxc	-1.94011	3.48682	26.6884	0.00054946	0.00188935
fadH	-1.67655	3.34965	26.6441	0.000552684	0.00189785
purT	1.792	8.3875	26.6421	0.000552828	0.00189785
sxy	-1.28506	5.25679	26.6175	0.000554635	0.00190251
metN	-1.74906	5.68676	26.5873	0.000556854	0.00190857
fabF	-1.5042	11.0705	26.4853	0.000564436	0.00193299
lptG	-1.15863	7.89598	26.4371	0.000568063	0.00194383
yphB	-1.36251	3.99978	26.4239	0.000569061	0.00194567
atl	1.12197	4.00371	26.4121	0.000569953	0.00194715
yheO	1.20077	7.16551	26.3518	0.000574552	0.00196127
hypF	-1.19904	4.02445	26.336	0.000575759	0.00196381
pabA	1.06348	5.77124	26.2569	0.000581872	0.00198306
gsk	1.03448	7.25812	26.2383	0.000583324	0.0019864
parE	-1.17726	8.05125	26.1917	0.000586971	0.00199721
ynfD	1.58815	2.63966	26.1075	0.000593637	0.00201827
yccJ	1.41167	7.6234	26.0828	0.000595607	0.00202334
yggP	-2.22812	3.42743	26.013	0.000601228	0.0020408
smg	0.99504	7.95592	25.979	0.000603987	0.00204852
ydaS	2.02055	2.25407	25.9158	0.000609154	0.00206438
poxB	-1.21486	5.8859	25.903	0.000610213	0.00206631
argB	-2.09403	5.68832	25.8692	0.000613002	0.0020741
yieP	1.37129	6.55939	25.8584	0.000613896	0.00207546
ygcE	-1.65274	3.33594	25.8339	0.000615937	0.00208069
gudP	-1.98367	2.40093	25.8253	0.000616657	0.00208146
secF	-1.22213	8.79238	25.7213	0.000625415	0.00210934
rseD	1.24728	5.8151	25.6868	0.000628348	0.00211754
lgt	1.45561	6.28533	25.6683	0.000629929	0.00212118
gspB	1.35957	2.70378	25.6325	0.000633005	0.00212984
mdlA	-1.27201	5.91377	25.6245	0.000633697	0.00213047
gntU	-1.05341	4.8267	25.5867	0.000636973	0.00213978
cpxP	2.8469	8.64821	25.5464	0.000640483	0.00214987
ruvA	1.11283	7.20985	25.4753	0.000646731	0.00216817
yibH	-1.55417	3.95459	25.4727	0.000646962	0.00216817
yncD	-1.60122	6.22199	25.4631	0.000647813	0.0021693
lysO	1.79642	4.18378	25.4162	0.000651987	0.0021804
rpiA	1.65413	8.63882	25.4143	0.000652159	0.0021804
cadA	-1.23443	3.77422	25.3682	0.000656299	0.00219251
ldhA	2.2502	6.84429	25.2897	0.000663417	0.00221452
nuoF	1.28626	8.31676	25.284	0.000663937	0.00221452
rluC	-1.01977	8.21171	25.2453	0.000667478	0.00222444
tgt	-1.15507	8.70396	25.24	0.000667963	0.00222444
psuT	-1.36321	3.57406	25.1591	0.000675465	0.00224765
rseB	-1.16838	8.32018	25.1227	0.000678871	0.00225721
yqjA	1.16087	6.75642	25.0799	0.000682898	0.0022686
hyaA	-2.91617	6.93779	25.0749	0.00068337	0.0022686
pdeF	-1.38629	3.71854	25.062	0.000684592	0.00227087
mrdA	-1.32649	8.003	25.0462	0.000686099	0.00227408
ylbE	-2.04186	3.15035	25.0356	0.000687104	0.00227563
cusA	-1.30288	4.42396	24.9505	0.000695263	0.00230085
menB	1.11504	7.05143	24.9279	0.000697459	0.00230487
bcsG	1.54856	4.93106	24.9266	0.000697586	0.00230487
yghO	-1.0917	4.7423	24.9164	0.000698576	0.00230487
yqiG	-2.07922	5.06372	24.9133	0.000698872	0.00230487
ftsX	-1.00165	7.94639	24.9099	0.000699206	0.00230487
mdtK	-1.20619	6.61754	24.8993	0.000700233	0.00230646
rffH	1.22506	6.72559	24.8745	0.000702658	0.00231264
yidR	-1.06408	6.78009	24.7787	0.000712112	0.00234193
tabA	1.30373	6.08321	24.7626	0.000713714	0.00234538
rpsE	-1.52188	12.5833	24.7421	0.000715763	0.00235028
sspB	1.17741	8.11103	24.7332	0.000716654	0.00235138
yjdI	1.34647	3.95349	24.7261	0.000717373	0.00235191
rnhA	1.07692	6.26588	24.6468	0.00072538	0.00237632
ampE	-1.0838	5.71905	24.5906	0.000731129	0.0023933
rpmA	1.22602	11.5004	24.5846	0.00073175	0.00239348
rplB	-1.40037	12.8912	24.572	0.000733046	0.00239587
yegP	1.33988	4.02779	24.5495	0.000735371	0.00240159
pntB	-1.12484	6.99464	24.544	0.000735933	0.00240159
adeD	-1.17207	5.00612	24.5216	0.000738265	0.00240734
rlhA	-1.06861	6.93962	24.4445	0.000746334	0.00243164
pgpA	1.34507	6.67879	24.4394	0.000746869	0.00243164
cycA	-1.06813	7.57711	24.4316	0.000747693	0.00243245
frwB	2.56343	0.814104	24.4163	0.000749308	0.00243583
ygeR	-0.994353	7.06276	24.3281	0.000758715	0.00246451
araG	-1.2508	3.6015	24.29	0.000762829	0.00247597
mrr	-1.02087	6.33076	24.2599	0.000766088	0.00248203
rhsE	-1.58497	3.61133	24.2571	0.000766391	0.00248203
fliD	-1.73074	2.48585	24.2565	0.000766458	0.00248203
allR	1.00856	7.33487	24.2218	0.00077025	0.0024924
gshA	-1.13568	8.46011	24.205	0.000772089	0.00249644
ybgQ	-1.68901	3.03765	24.1466	0.000778534	0.00251535
aroP	-1.2694	6.84308	24.1239	0.000781061	0.00252159
dgcM	-1.30476	4.74735	24.0087	0.000794012	0.00256144
bamB	-1.12813	9.0433	23.971	0.000798312	0.00257335
betB	-1.20699	7.59634	23.9211	0.00080404	0.00258984
tdcF	1.41525	2.13766	23.8975	0.000806775	0.00259667
appA	-2.5701	7.15679	23.8692	0.000810058	0.00260525
miaB	-1.13951	8.35004	23.863	0.000810777	0.00260559
lysU	1.11808	8.27661	23.8395	0.000813522	0.00261242
maeB	-1.04731	7.27969	23.8221	0.000815557	0.00261663
crcB	1.10482	5.55816	23.8171	0.00081615	0.00261663
rapZ	1.2795	6.73811	23.8125	0.000816691	0.00261663
hemB	1.73119	7.88809	23.7653	0.00082226	0.00263248
emtA	-1.29938	7.62205	23.7377	0.000825545	0.00264099
yafZ	-1.07091	3.94999	23.7311	0.000826335	0.00264152
mdtJ	2.2916	4.37423	23.7044	0.000829522	0.0026497
yqiK	-1.27281	3.70719	23.6793	0.000832539	0.00265733
bfr	1.20984	7.84884	23.6498	0.000836103	0.00266649
dtpC	-1.1585	4.20307	23.6451	0.000836668	0.00266649
nemA	1.40628	5.47079	23.5688	0.00084597	0.0026941
rpsL	1.23744	11.9118	23.5494	0.000848355	0.00269712
yhjE	-1.37411	3.65469	23.5404	0.000849469	0.00269712
intD	-1.19929	7.23157	23.5385	0.000849693	0.00269712
ybbO	0.9536	5.40802	23.5374	0.000849829	0.00269712
fabZ	1.13606	9.33748	23.5352	0.00085011	0.00269712
yibS	1.9121	2.30742	23.5049	0.000853853	0.00270696
pyrG	-1.44303	9.76738	23.4867	0.000856114	0.0027121
lpcA	1.2614	7.79114	23.4715	0.000858013	0.00271608
nanM	-1.95053	5.42723	23.458	0.000859698	0.0027192
yiaV	-1.50744	3.86909	23.4533	0.000860286	0.0027192
atpI	1.24052	9.47568	23.4327	0.000862874	0.00272534
yajI	1.75925	5.02441	23.4195	0.000864536	0.00272764
rplO	-1.48924	12.7077	23.4161	0.000864969	0.00272764
yahN	-1.67519	4.83364	23.4116	0.000865539	0.00272764
yjiT	-1.52399	6.20779	23.4057	0.00086628	0.00272784
yjhF	-1.24647	4.29143	23.3917	0.000868047	0.00272784
waaC	1.47593	6.88247	23.3887	0.000868428	0.00272784
yrfG	0.897712	6.66885	23.3843	0.000868988	0.00272784
ybaL	-1.23009	7.12682	23.3834	0.000869098	0.00272784
evgS	-1.58221	6.21223	23.3805	0.000869475	0.00272784
dxr	-1.29092	7.3748	23.3754	0.000870123	0.00272785
hupA	2.066	10.2858	23.3602	0.000872046	0.00273185
rfaD	1.2453	8.174	23.3359	0.000875155	0.00273956
mnmG	-1.10051	8.86455	23.3034	0.000879318	0.00275056
pitB	-1.40927	3.06097	23.2792	0.000882436	0.00275827
yraN	0.92339	5.47531	23.2736	0.000883165	0.0027585
yjhU	-0.995912	7.89869	23.256	0.000885449	0.00276359
yoaB	1.24251	7.12493	23.2063	0.00089193	0.00278177
malM	-1.17144	4.4112	23.1758	0.000895932	0.00279219
clpX	-1.19492	9.89223	23.0524	0.000912346	0.00284125
yiiR	1.40609	4.33664	23.0314	0.000915178	0.00284797
yebF	1.07518	8.5721	23.0111	0.000917931	0.00285444
potC	1.52158	5.96707	22.9582	0.000925139	0.00287473
ycjM	-2.20442	3.02547	22.939	0.000927776	0.00288081
topB	-1.39802	7.38482	22.9249	0.000929707	0.00288469
rpsN	-1.37859	12.6049	22.9082	0.000932017	0.00288973
sgcA	1.46628	2.77721	22.8584	0.000938924	0.00290901
ypaA	1.59005	3.66377	22.8011	0.000946956	0.0029308
uxuB	-1.44383	5.09049	22.7983	0.000947343	0.0029308
ada	-1.22133	5.32006	22.7901	0.000948507	0.00293225
mfd	-0.997507	6.68685	22.7468	0.00095463	0.00294903
yjfJ	-1.5339	3.31474	22.7263	0.000957554	0.00295486
yfaY	-1.06145	6.09656	22.7238	0.000957918	0.00295486
yhcG	-1.56842	4.5679	22.7092	0.000960005	0.00295733
htrE	-1.99686	3.74395	22.7079	0.000960189	0.00295733
kduI	-1.31778	3.68081	22.7035	0.000960817	0.00295733
yejK	-1.28919	7.57251	22.6806	0.000964107	0.0029653
fadD	-0.978684	6.51118	22.6615	0.000966856	0.00297159
maoP	1.80188	10.5035	22.6503	0.000968477	0.00297441
argC	-3.75918	5.96354	22.5781	0.000979007	0.00300456
yehM	-1.66152	2.49612	22.5402	0.000984576	0.00301946
uspE	-0.975846	7.78927	22.534	0.000985491	0.00302008
nanT	-1.49536	3.02082	22.5282	0.000986345	0.0030205
yafO	1.04076	6.13348	22.5203	0.000987519	0.00302191
yhfS	-1.21279	3.82014	22.5089	0.000989218	0.00302408
preA	-1.34918	3.73755	22.5059	0.000989661	0.00302408
mcbR	-1.34787	5.26558	22.4477	0.000998348	0.00304842
tsf	-1.67925	11.5908	22.4292	0.00100114	0.00305181
nfi	1.38172	6.35749	22.4289	0.00100118	0.00305181
gltS	-1.56352	6.74779	22.426	0.00100162	0.00305181
gntR	1.17646	6.27188	22.4057	0.00100469	0.00305896
ftsQ	-0.975213	8.52273	22.371	0.00100996	0.00307279
rsmJ	0.97837	6.10788	22.3616	0.00101139	0.00307435
lepA	-1.15702	8.76406	22.3581	0.00101193	0.00307435
argT	-0.970062	6.88414	22.3374	0.0010151	0.00308175
bsmA	0.969728	4.50485	22.3241	0.00101713	0.00308569
yliI	-1.15516	3.90021	22.2917	0.00102213	0.00309864
intR	-1.35995	3.87956	22.2794	0.00102404	0.0031022
flgL	-1.10023	3.9996	22.2534	0.00102807	0.0031122
rpsC	-1.36835	12.7498	22.2459	0.00102924	0.00311303
yjhD	1.84786	3.69241	22.2422	0.00102982	0.00311303
ygeK	1.70678	1.85251	22.2162	0.00103388	0.00312309
ttcA	-1.08841	7.55566	22.2072	0.00103529	0.00312511
gltL	1.3885	5.95826	22.197	0.00103689	0.00312771
apt	1.40102	7.24615	22.1906	0.00103789	0.00312849
spy	1.00269	5.16994	22.1637	0.00104214	0.00313906
yphC	-1.41416	3.95098	22.1574	0.00104315	0.00313984
gspL	-1.08928	4.50827	22.1301	0.00104749	0.00315067
ettA	-1.12874	9.53163	22.1053	0.00105144	0.0031603
trmH	1.61777	6.37261	22.0786	0.00105573	0.00317093
pyrF	-1.14456	7.72934	22.0285	0.00106382	0.00319298
waaS	1.01102	6.96755	22.0216	0.00106493	0.00319404
hofN	-1.91295	2.4031	21.9884	0.00107035	0.003208
folA	1.30529	7.96776	21.9547	0.00107588	0.0032223
eamB	1.23853	3.19551	21.9241	0.00108093	0.00323514
agaR	-1.22976	7.58691	21.8809	0.00108811	0.00325304
yciG	3.47486	3.07682	21.8788	0.00108845	0.00325304
trxB	1.09065	8.85684	21.87	0.00108992	0.00325513
bglH	-2.14439	3.50274	21.8109	0.00109986	0.00328249
nrfE	-1.36386	2.84408	21.782	0.00110476	0.00329479
uspB	1.01003	5.41916	21.7185	0.00111562	0.00332484
nrdA	2.36682	8.96061	21.71	0.00111709	0.00332685
dcm	-1.00812	6.82723	21.6816	0.00112199	0.00333911
yhiM	-1.44876	4.91727	21.6345	0.00113018	0.0033594
fecE	1.70449	5.34616	21.6332	0.0011304	0.0033594
yhhX	1.10844	6.10464	21.5742	0.00114078	0.00338634
yhhY	1.17366	4.17285	21.5725	0.00114107	0.00338634
chbB	1.20507	4.53318	21.5581	0.00114363	0.00339156
yiiG	-1.45961	3.8368	21.5113	0.00115195	0.00341384
pabB	-0.945223	5.60936	21.5066	0.0011528	0.00341397
yghW	2.21606	1.19078	21.4959	0.00115472	0.00341725
pmrR	-2.79169	3.17178	21.4451	0.00116388	0.00344195
ybjT	-0.813689	6.01552	21.3831	0.00117517	0.00347266
gmhB	0.86217	6.86112	21.3791	0.0011759	0.00347266
shiA	-0.922808	6.08593	21.3737	0.00117688	0.00347312
hofM	-1.41719	3.48307	21.3601	0.00117938	0.00347807
yaeH	1.20287	6.61161	21.3486	0.00118151	0.00348193
zraR	-0.892498	6.17872	21.2726	0.00119563	0.00352107
ydfU	-1.4334	2.94469	21.2645	0.00119714	0.00352306
cnoX	1.55791	7.31785	21.2547	0.00119898	0.00352603
bdcA	1.54189	3.71811	21.2132	0.00120682	0.0035466
afuB	1.55506	2.4759	21.1896	0.00121129	0.00355726
puuD	1.37116	6.87015	21.1652	0.00121593	0.00356842
racC	2.45643	1.80547	21.1521	0.00121845	0.00357333
yqiJ	1.65357	3.40113	21.1355	0.00122164	0.00358019
ldtC	1.68071	4.91871	21.1278	0.00122311	0.00358202
rpe	1.07295	7.15822	21.0777	0.00123279	0.00360788
ymgE	1.40626	2.88341	21.07	0.00123429	0.00360977
arpB	-1.74081	3.83888	20.9964	0.0012487	0.0036494
can	1.03317	8.86956	20.9528	0.00125735	0.00367054
pcm	0.912362	7.25294	20.9456	0.00125879	0.00367054
rluE	1.44074	4.39314	20.9441	0.00125908	0.00367054
gyrA	-1.02178	9.58259	20.9424	0.00125941	0.00367054
btuD	-1.08268	5.94126	20.9374	0.00126042	0.00367056
dgcT	-1.85729	6.21962	20.9337	0.00126116	0.00367056
rclA	-1.35917	4.85817	20.8828	0.00127139	0.0036961
yiiE	1.74685	2.03467	20.88	0.00127194	0.0036961
yaeQ	0.995	6.16883	20.877	0.00127256	0.0036961
frlD	-1.22585	4.11046	20.8613	0.00127572	0.00370274
yieL	-1.25396	3.3978	20.8234	0.00128343	0.00372256
yigB	0.944386	6.37478	20.8182	0.00128448	0.00372306
mzrA	1.10132	6.1481	20.8007	0.00128807	0.00373091
add	1.35549	5.07153	20.7853	0.00129124	0.00373753
yjjU	-1.16946	6.89167	20.7152	0.00130574	0.00377692
ydfK	1.80044	5.38875	20.6974	0.00130946	0.00378507
ynfM	1.26598	5.30675	20.6783	0.00131346	0.00379404
pepN	-1.14009	8.10433	20.6738	0.00131441	0.00379418
potA	1.19108	6.86313	20.6676	0.0013157	0.00379532
paaJ	-0.93679	4.48577	20.6386	0.00132183	0.0038104
yhbX	-1.54685	4.77121	20.6184	0.0013261	0.00382009
rlmF	-1.06392	6.30379	20.5872	0.00133274	0.00383663
ydgK	1.03424	6.56333	20.5314	0.00134473	0.0038685
chpS	1.06665	4.65225	20.4851	0.00135477	0.00389474
yiiX	-1.01407	6.03673	20.4771	0.00135653	0.00389713
purM	1.38012	9.89238	20.4228	0.00136845	0.00392872
ydhK	-1.43273	4.67709	20.3903	0.00137564	0.00394669
atoS	-1.16406	3.35891	20.3466	0.00138538	0.00397028
rihA	1.41024	4.04743	20.345	0.00138574	0.00397028
ydjH	-1.69597	2.80889	20.331	0.00138888	0.00397441
nagA	-1.03154	6.84895	20.3277	0.00138964	0.00397441
ykgG	-1.2207	5.3306	20.326	0.00139001	0.00397441
yfdT	2.2583	1.11268	20.3062	0.00139448	0.00398449
rsd	1.09098	7.15742	20.2721	0.0014022	0.00400386
nmpC	1.52468	5.82794	20.2209	0.00141389	0.00403451
ycfP	0.967912	7.18785	20.2011	0.00141844	0.00404234
ddpF	-1.37705	3.50969	20.2007	0.00141855	0.00404234
dnaA	-1.25364	8.86039	20.1867	0.00142176	0.00404877
ydfI	-1.74267	3.42341	20.1752	0.00142443	0.00405362
usg	-1.03282	7.48302	20.1545	0.00142925	0.0040646
rlmH	1.09577	7.29673	20.1465	0.0014311	0.00406617
sutR	1.4316	3.5122	20.139	0.00143286	0.00406617
rbsA	1.58897	5.94136	20.1362	0.0014335	0.00406617
pdxK	1.14735	5.78394	20.1341	0.001434	0.00406617
panB	1.13618	8.11278	20.1315	0.00143461	0.00406617
mdtI	1.76454	4.01353	20.1238	0.00143641	0.00406855
ydeA	-1.12835	6.05693	20.0747	0.00144797	0.00409853
kdgR	-0.988237	7.82225	20.0657	0.00145008	0.00410176
yphF	-2.16796	2.99681	20.0491	0.00145403	0.00410859
trmJ	1.07399	7.93799	20.0474	0.00145444	0.00410859
mak	-0.92341	5.98521	20.0181	0.0014614	0.0041255
uidR	0.926874	5.9063	19.9704	0.00147286	0.00415509
cpxR	0.903589	7.51638	19.953	0.00147709	0.00416423
mntH	-1.18305	6.995	19.9457	0.00147886	0.00416546
dps	1.3288	8.03345	19.939	0.00148048	0.00416546
ridA	1.31928	9.01907	19.939	0.00148048	0.00416546
insH-5	5.88758	-0.173322	24.734	0.00148267	0.00416882
yhjJ	-0.877099	7.1177	19.9001	0.00148997	0.00418658
aphA	-0.975036	4.61867	19.8949	0.00149123	0.00418678
mlaD	-0.955286	7.52015	19.8917	0.00149202	0.00418678
lolA	0.911288	7.25923	19.8756	0.00149596	0.00419505
ydhB	-0.958572	5.47184	19.8488	0.00150257	0.0042098
rsxC	-1.63763	6.63125	19.8462	0.00150321	0.0042098
ydiS	-1.98652	2.32665	19.7791	0.00151993	0.0042538
ppx	0.978559	6.54563	19.7202	0.00153481	0.0042926
yeiP	1.14466	7.34945	19.6843	0.00154396	0.00431532
gspD	-1.18249	4.0033	19.6692	0.0015478	0.0043232
mltA	-0.900741	7.8611	19.6374	0.00155598	0.0043427
ftsZ	-0.963649	10.0112	19.6341	0.00155684	0.0043427
sgrR	-1.01716	4.16968	19.6153	0.0015617	0.0043534
ybhA	1.1266	6.2192	19.6052	0.00156434	0.00435787
yjhC	0.873287	5.65477	19.5789	0.00157117	0.00437403
ycaD	-1.51524	8.18846	19.5482	0.00157922	0.00439353
znuC	0.803182	5.09707	19.5422	0.00158079	0.00439501
appB	-2.82053	8.08897	19.5303	0.00158393	0.00440084
ydjG	-1.61249	3.95768	19.5071	0.00159008	0.00441503
sbcC	-0.959327	6.15816	19.4371	0.00160876	0.00446396
folC	-0.933719	7.72669	19.4276	0.0016113	0.00446807
xapR	-1.36698	5.57927	19.4011	0.00161845	0.00448497
ybhR	-1.27734	4.46218	19.3873	0.0016222	0.0044924
paoC	-1.29812	3.43127	19.3627	0.00162891	0.00450805
hflX	-0.913343	9.21689	19.313	0.00164254	0.00454109
rpsI	1.08001	11.8399	19.3113	0.001643	0.00454109
purK	1.59367	9.1488	19.2955	0.00164738	0.00455021
yibN	1.18942	8.55653	19.2822	0.00165105	0.00455737
surA	-1.00179	8.9861	19.2755	0.00165291	0.00455953
ykfM	1.78507	1.96741	19.2504	0.0016599	0.00457582
sapB	1.18197	4.27194	19.2062	0.00167231	0.00460704
essD	1.66279	3.37666	19.1834	0.00167875	0.00462174
rstA	-1.0836	7.07135	19.1714	0.00168215	0.00462812
ysaB	1.801	3.61245	19.1611	0.00168506	0.00463309
ygeQ	-1.73534	6.68339	19.1262	0.00169503	0.00465502
eutG	-2.01075	2.29294	19.1255	0.00169524	0.00465502
fecB	1.54415	6.43626	19.1006	0.00170239	0.00467162
hypT	-0.8328	5.95972	19.094	0.00170428	0.00467377
dgcN	-1.1268	5.38948	19.0612	0.00171379	0.00469681
fimD	-1.10172	9.63783	19.023	0.00172491	0.00472422
yceK	1.0278	6.69805	18.9992	0.0017319	0.0047398
yaaY	1.88965	1.47551	18.996	0.00173284	0.0047398
mdlB	-1.13705	5.82293	18.9914	0.00173421	0.00474047
basR	1.20512	5.64714	18.9717	0.00174002	0.00475276
ascF	-1.13949	3.8376	18.9685	0.00174095	0.00475276
kdpE	1.01227	3.74127	18.936	0.0017506	0.00477586
fhuE	1.35465	5.03317	18.9324	0.00175167	0.00477586
amiD	-0.852199	6.29128	18.9207	0.00175519	0.00478235
ypfN	0.829749	5.67368	18.8951	0.00176285	0.00479837
ygaP	1.14898	4.30034	18.8935	0.00176334	0.00479837
gspM	1.15464	3.72065	18.8476	0.0017772	0.00483063
yfeK	1.15924	4.38023	18.8467	0.00177748	0.00483063
thiS	3.03126	6.01509	18.8335	0.0017815	0.00483843
ynjF	0.915277	3.72	18.7785	0.00179831	0.00488097
mntR	0.926786	7.39025	18.7658	0.00180223	0.00488586
dcuC	-1.1346	3.38182	18.7652	0.00180243	0.00488586
yahH	1.53193	2.12121	18.7328	0.00181247	0.00490992
radA	-0.853498	7.24029	18.7244	0.00181507	0.00491382
yggR	-1.22361	3.29065	18.7162	0.00181763	0.0049176
yrbL	-1.55675	8.70642	18.6998	0.00182275	0.00492574
ybhL	0.8303	6.40903	18.6987	0.00182311	0.00492574
bssR	1.7979	4.12815	18.6954	0.00182413	0.00492574
orn	1.25311	7.11495	18.6454	0.0018399	0.00496514
pheS	-1.07717	8.22721	18.6392	0.00184186	0.00496702
yoaK	-3.35953	1.72081	18.6358	0.00184294	0.00496702
yehQ	-1.57027	3.35432	18.6299	0.00184482	0.00496889
glpT	-1.00752	5.89792	18.6211	0.00184759	0.00497321
aat	0.839494	4.67313	18.6091	0.00185141	0.00498031
cysH	1.76882	8.2838	18.589	0.00185786	0.00499447
mog	1.05008	6.66736	18.5562	0.0018684	0.00501961
nanK	-1.1446	4.37248	18.5089	0.00188374	0.00505762
hcaD	-1.05672	3.59109	18.4543	0.00190162	0.00509922
asnC	1.25168	3.5176	18.4542	0.00190165	0.00509922
ahr	-1.00898	6.22504	18.441	0.00190602	0.00510636
yqjC	-1.06645	8.55984	18.4389	0.00190673	0.00510636
dgoT	-1.24786	3.84629	18.3666	0.0019308	0.00516755
dcd	0.816855	7.35389	18.3584	0.00193358	0.00517083
ygfF	1.37208	5.03194	18.3557	0.00193447	0.00517083
sodC	0.982228	4.38023	18.33	0.00194315	0.00519073
ynbC	-1.3664	3.00165	18.3107	0.00194969	0.00520492
cusC	1.31265	3.64868	18.2975	0.0019542	0.00521367
yghG	1.60383	3.74713	18.2831	0.00195912	0.0052235
iraP	1.49374	6.25557	18.2639	0.00196567	0.00523744
phoA	-3.38793	6.97832	18.2606	0.00196683	0.00523744
ilvL	-2.13301	4.10355	18.2548	0.00196881	0.0052394
hyuA	-1.37608	2.75845	18.2466	0.00197163	0.00524363
yqaA	0.772944	6.20284	18.2162	0.00198214	0.005268
elaA	0.79826	5.37877	18.2129	0.00198329	0.005268
waaZ	1.09217	5.87125	18.1373	0.00200974	0.0053349
ybhI	-1.88361	2.58467	18.1238	0.00201451	0.00534286
ybcV	1.94475	1.16463	18.1184	0.0020164	0.00534286
ydcK	-0.988455	4.00753	18.1181	0.00201653	0.00534286
rcdA	1.19281	3.94075	18.073	0.00203256	0.00538194
xylE	-1.37585	3.79745	18.0548	0.00203907	0.00539251
ybaK	1.11498	5.95324	18.0548	0.0020391	0.00539251
ybiR	-0.771762	6.28259	18.0384	0.00204497	0.00540466
kbp	1.10047	7.08464	18.0339	0.00204661	0.0054056
yajC	0.979365	8.79859	18.0127	0.00205425	0.0054224
hycI	1.01112	4.93729	17.9959	0.00206038	0.00543518
ylbF	-1.30572	2.64364	17.982	0.00206541	0.00544505
uvrD	-0.982636	8.44463	17.9395	0.00208098	0.00548269
ybcF	-0.988802	3.92254	17.8694	0.00210698	0.00554773
rna	0.857016	5.89143	17.8383	0.00211866	0.00557501
yqjG	-0.811164	5.52484	17.8237	0.00212415	0.00558597
yciT	0.880324	5.53464	17.8137	0.0021279	0.00559236
ybiA	0.956706	3.85652	17.7677	0.00214542	0.00563154
putP	-1.40414	6.94035	17.7675	0.00214547	0.00563154
ydhJ	-1.22394	4.60707	17.701	0.00217107	0.00569518
chbG	-1.00729	4.64602	17.6787	0.00217972	0.00571433
kdpC	1.32889	4.27335	17.6711	0.00218269	0.00571858
flhC	1.15724	3.11161	17.6541	0.00218933	0.0057324
pgm	-1.04045	8.73352	17.6499	0.00219098	0.00573319
csiE	-0.951968	3.98759	17.5449	0.0022326	0.00583847
metB	-0.834218	6.10306	17.5146	0.0022448	0.00586673
yqeG	0.906396	5.50746	17.4889	0.0022552	0.00589028
frdD	0.948344	5.02419	17.4845	0.00225696	0.00589125
betA	-1.0188	6.56839	17.4758	0.00226052	0.00589689
amtB	-2.60908	7.14458	17.4701	0.00226285	0.00589932
yggS	0.948577	5.07042	17.4612	0.00226646	0.00590509
avtA	1.18199	7.23947	17.4521	0.0022702	0.0059112
astA	-2.01341	5.82992	17.4222	0.00228245	0.00593937
pgrR	-1.07325	5.03784	17.4189	0.00228383	0.00593937
csgD	-1.66708	5.22927	17.3773	0.00230106	0.00598048
yfbK	-1.45234	3.9412	17.3551	0.00231031	0.00599767
ansP	-1.66868	5.02356	17.3536	0.00231094	0.00599767
pgpC	-1.40766	6.72585	17.3512	0.00231193	0.00599767
ygaZ	0.812187	6.50937	17.3347	0.00231887	0.006012
yehY	-0.908028	4.4719	17.3153	0.00232702	0.00602942
ubiE	0.991313	7.93812	17.3004	0.00233333	0.00604207
aroD	1.05784	4.44131	17.265	0.00234837	0.00607729
kilR	2.74388	0.982161	17.2574	0.00235162	0.00608198
rsxG	1.4833	4.21484	17.2258	0.00236516	0.00611326
ydcI	1.02666	6.80737	17.1901	0.00238058	0.00614935
prmA	0.973017	6.82156	17.1736	0.00238775	0.00616411
yafC	-1.03076	4.90205	17.1233	0.00240978	0.00621718
mutS	-0.984032	7.14628	17.094	0.00242269	0.00624667
yfeY	-0.931795	6.94621	17.0798	0.00242901	0.00625913
yjiG	-1.58131	4.30095	17.0603	0.00243767	0.00627523
yqhG	-1.08285	3.4523	17.0549	0.0024401	0.00627523
cysP	-1.27469	8.52554	17.0543	0.00244037	0.00627523
ybfE	1.01897	5.1124	17.0509	0.0024419	0.00627523
fbaA	1.48105	10.4802	17.0491	0.00244268	0.00627523
mioC	1.18976	8.29005	17.0414	0.00244612	0.00628027
ygcQ	-1.24727	3.26688	16.9876	0.00247039	0.00633871
pdeD	-1.12348	3.57864	16.9414	0.0024915	0.00638899
hisD	-0.858827	5.44998	16.8773	0.00252106	0.00645777
leuD	-0.83393	5.44075	16.8766	0.00252137	0.00645777
yaiL	0.846833	8.74495	16.8584	0.00252987	0.00647561
hybE	-0.938721	5.70193	16.8516	0.00253306	0.00647985
nanS	-1.71281	4.08024	16.8379	0.00253946	0.0064923
yibG	1.50444	2.97296	16.8298	0.00254328	0.00649814
yfgO	-0.854383	5.94448	16.7931	0.00256062	0.0065361
ulaD	-0.952989	3.79506	16.7918	0.00256123	0.0065361
yaaA	1.06462	5.95171	16.7766	0.00256844	0.00655052
cof	-1.04631	4.39653	16.7703	0.00257146	0.00655428
yhhN	0.920252	4.39249	16.7527	0.00257983	0.0065685
mhpR	-1.0612	7.5263	16.7521	0.00258015	0.0065685
emrD	-1.39397	6.58717	16.7304	0.00259056	0.00659104
nemR	1.21623	3.98605	16.6859	0.00261203	0.00664166
ytfJ	1.01798	4.63263	16.6823	0.00261381	0.00664219
ycgJ	0.828861	5.55177	16.6425	0.00263321	0.00668746
pxpB	-0.867332	7.15248	16.6329	0.00263794	0.00669546
dnaX_2	-1.05896	7.94816	16.6088	0.00264981	0.00672156
yqeC	-1.77455	2.57221	16.5689	0.00266963	0.00676775
rhtC	1.09077	6.10224	16.5403	0.00268396	0.0068
spoT	-0.890682	8.6886	16.531	0.00268863	0.00680776
cobC	1.04866	4.9004	16.5138	0.0026973	0.00682561
folK	1.43964	5.55771	16.5033	0.00270262	0.00683499
argF	-2.03671	6.56606	16.4832	0.00271279	0.00685662
pppA	1.16613	4.52852	16.4789	0.00271499	0.00685806
aceA	-1.13005	5.10617	16.4681	0.00272051	0.0068679
rep	-0.934479	7.28048	16.4499	0.00272981	0.00688727
envC	-0.795741	7.473	16.4365	0.0027367	0.00690052
rplJ	-1.23401	12.6631	16.4327	0.00273863	0.00690129
yeaX	-1.18372	3.30606	16.4252	0.00274249	0.00690688
pqiA	-0.915068	6.2531	16.4136	0.00274847	0.00691784
rplU	0.953231	11.4282	16.4056	0.0027526	0.00692089
gcl	-1.50796	2.93682	16.4049	0.00275296	0.00692089
insG	-0.80309	5.33689	16.3825	0.0027646	0.00694379
gatY	1.13664	7.94866	16.3811	0.00276536	0.00694379
secB	1.14855	8.7136	16.3727	0.00276971	0.00695059
bcsQ	-0.857911	5.87614	16.3537	0.00277966	0.00697143
torT	-0.951014	4.17493	16.3417	0.00278595	0.00698306
mdtF	-1.86663	7.21614	16.3319	0.00279109	0.0069918
yieE	-1.06114	5.2064	16.3276	0.0027934	0.00699342
ygiC	1.07912	6.90765	16.3168	0.00279909	0.00700352
cysE	0.806616	7.38265	16.2629	0.00282771	0.00707095
gntP	0.939307	3.8183	16.2568	0.00283101	0.00707501
opgE	-1.17819	6.52002	16.2437	0.00283803	0.00708836
yjhG	-0.986065	4.75713	16.2229	0.00284925	0.00711218
ulaR	-0.810236	5.0404	16.2068	0.00285795	0.00712969
xdhC	1.34509	1.7518	16.174	0.00287582	0.00717005
exoX	0.882023	4.59716	16.1347	0.00289738	0.00721761
yjgH	1.41847	3.10783	16.133	0.00289832	0.00721761
ykgA	1.11945	4.45918	16.1276	0.00290125	0.00722067
cysN	-1.73413	9.84445	16.1128	0.00290949	0.00723691
otsB	-0.858764	5.49673	16.0921	0.00292098	0.00725717
yqcC	1.12383	4.34271	16.0907	0.00292175	0.00725717
pgaC	-1.56453	3.60969	16.0888	0.00292279	0.00725717
pdeC	-0.915351	4.41161	16.0837	0.00292566	0.00726003
ylcJ	3.14888	0.301912	16.0674	0.00293473	0.00727827
dgkA	0.76809	6.10219	16.0432	0.00294836	0.00730777
ygiA	0.99352	4.9214	16.0264	0.00295782	0.00732693
dnaE	-0.893398	8.14573	16.0149	0.00296431	0.00733871
rfbB	-0.912136	9.14871	16.0096	0.00296736	0.00734196
hypE	-0.940539	4.73374	15.9783	0.00298518	0.00738173
sppA	-0.852809	6.96067	15.9314	0.00301212	0.00744315
rlmB	0.859872	6.81504	15.9289	0.00301354	0.00744315
yaiW	-0.962122	6.50844	15.8822	0.00304072	0.00750589
phoE	-3.5687	8.35351	15.8738	0.00304566	0.00750973
arnC	1.74014	3.3885	15.8735	0.00304583	0.00750973
recN	-1.06983	8.64189	15.8202	0.00307724	0.00758275
gabD	-1.42728	4.51166	15.8038	0.00308702	0.00760241
artJ	-1.99019	5.41572	15.7933	0.00309324	0.00761329
ccmC	0.78108	4.61023	15.7809	0.00310064	0.00762531
ghoS	1.76892	2.06766	15.7791	0.00310173	0.00762531
ybdL	-1.12084	3.5427	15.7471	0.00312097	0.00766815
yoaA	-0.792198	6.53333	15.725	0.00313438	0.00769663
plsX	-1.04319	9.18435	15.6791	0.00316234	0.00776077
ycdX	0.773496	7.31102	15.6755	0.00316456	0.0077617
rseA	-1.07518	9.26391	15.6392	0.00318697	0.00781214
uidC	-2.15259	3.16876	15.6357	0.00318912	0.00781288
mscM	-0.897216	5.86127	15.6316	0.00319164	0.00781454
ycfJ	1.30224	6.79681	15.5264	0.00325775	0.00797019
ynbD	-1.02643	3.49081	15.5245	0.00325899	0.00797019
ccmE	0.853058	4.24617	15.5055	0.00327106	0.00799509
rplY	1.46154	9.41318	15.4783	0.0032885	0.00803307
cas1	-1.10035	4.54472	15.4542	0.00330405	0.00806638
glyS	-1.16462	9.72189	15.4459	0.00330942	0.00807483
yqhA	1.0169	6.84825	15.4415	0.00331232	0.00807725
pphB	1.27294	2.95512	15.4293	0.00332027	0.00809195
prfB	1.1657	8.63002	15.4238	0.00332383	0.00809597
ykiC	3.64407	-0.402928	15.709	0.00335038	0.00815594
secM	0.93726	7.77326	15.3665	0.00336143	0.00817814
ychQ	1.23154	6.01513	15.3582	0.00336691	0.00818389
fumE	0.742005	6.13857	15.3571	0.00336767	0.00818389
sufA	1.65297	4.47208	15.3455	0.00337533	0.00819778
sgcC	-1.34589	2.74564	15.3293	0.00338615	0.00821934
araA	-1.01591	3.38546	15.3253	0.00338881	0.00822106
cysQ	-1.01587	6.39122	15.3139	0.00339641	0.00823479
ykfI	-0.891881	6.04617	15.3104	0.00339874	0.0082357
cpdA	-0.783064	7.60761	15.3027	0.00340389	0.00824346
dosP	-1.45408	3.09693	15.2998	0.00340586	0.00824351
grcA	3.32359	8.69128	15.2355	0.00344938	0.00834407
rpnC	-0.874419	5.31476	15.1995	0.00347402	0.00839772
alaC	-0.848817	6.30337	15.1973	0.00347553	0.00839772
purF	1.05959	9.49138	15.1686	0.00349539	0.00844087
rutG	-1.04898	3.60413	15.1456	0.00351141	0.00847471
rfbD	-1.1291	8.39971	15.132	0.00352087	0.0084927
ybjH	0.900107	5.4412	15.1145	0.00353313	0.00851741
yjeI	0.871392	7.7649	15.1062	0.00353895	0.00852656
yciU	0.821363	7.28728	15.0739	0.00356177	0.00857476
sseB	1.02556	7.47341	15.0722	0.00356301	0.00857476
modA	-0.861217	5.52314	15.0566	0.0035741	0.00859654
mdtB	-1.07023	4.36063	15.0454	0.0035821	0.00861088
hprR	-1.12227	6.37105	15.0252	0.00359653	0.00863607
fdrA	-1.82459	2.01447	15.025	0.00359666	0.00863607
gcvA	-1.00735	5.78803	15.0194	0.00360069	0.00864083
yehA	-1.68663	3.56014	15.0116	0.00360636	0.00864949
gfcA	0.97313	3.71601	15.0087	0.00360839	0.00864949
cbrB	1.23059	6.94925	14.9719	0.00363506	0.00870848
fimA	1.35188	12.9641	14.9643	0.00364057	0.00871674
ytfF	0.726615	4.9689	14.9187	0.00367399	0.00879146
nanA	1.16677	3.25907	14.9161	0.00367594	0.00879146
osmC	1.36351	6.67038	14.9025	0.00368595	0.00881043
dmsD	0.915851	5.20024	14.8831	0.00370035	0.00883985
btuC	-0.914084	5.70748	14.8728	0.00370797	0.00885304
cbpM	0.848279	5.55166	14.854	0.00372202	0.00888157
pphA	-0.870373	4.94875	14.8442	0.00372936	0.00889405
holC	0.68082	5.77606	14.8108	0.00375454	0.00894907
xylA	-0.824977	4.76963	14.8028	0.00376063	0.00895851
lpoB	-1.07968	6.20147	14.7782	0.00377928	0.00899788
yehX	-0.902162	4.59752	14.7703	0.00378538	0.00900734
focB	-1.05591	4.90667	14.7669	0.00378798	0.00900844
yfiM	1.38599	7.14174	14.7138	0.0038288	0.00910039
hscA	-0.981127	9.39392	14.6838	0.00385216	0.00915078
purA	1.86839	10.3964	14.6374	0.00388855	0.00923204
ynfE	-1.29882	3.08686	14.6285	0.00389561	0.00924361
hns	1.29117	10.1869	14.6207	0.00390179	0.0092503
wzzB	-0.905174	10.2543	14.6194	0.00390281	0.0092503
ynjD	1.07132	2.96744	14.6044	0.00391473	0.00927335
dam	1.03184	7.04298	14.5985	0.00391941	0.00927923
rstB	-1.59024	6.78887	14.5901	0.00392619	0.00929007
ycaK	-1.62681	4.40519	14.5718	0.00394079	0.00931942
secA	-1.17708	9.1749	14.5626	0.00394817	0.00932926
yegT	-1.28469	2.58469	14.5736	0.00394937	0.00932926
crr	1.16937	10.32	14.5527	0.00395622	0.0093402
mdh	-1.20858	10.6158	14.5198	0.0039828	0.00939282
astC	-1.52486	6.33953	14.5196	0.00398295	0.00939282
rcnR	-1.17491	5.26942	14.4934	0.00400434	0.009438
insA-3	0.970407	4.48617	14.4602	0.00403167	0.00949712
ftnA	1.29591	6.07617	14.4279	0.0040584	0.00955476
ydhV	-1.98621	2.58447	14.421	0.00406416	0.00956299
ydeP	-1.60534	3.76322	14.4139	0.00407008	0.00957108
degP	-1.40459	8.83932	14.4114	0.00407212	0.00957108
allD	-1.49134	2.71434	14.3963	0.00408481	0.00959557
metE	-1.28806	5.04978	14.3892	0.00409078	0.00960424
ssuB	-0.848907	4.60336	14.3792	0.0040992	0.00961866
yoaG	1.57302	1.33685	14.3725	0.00410481	0.00962649
rlmJ	1.17756	5.65118	14.3556	0.00411913	0.00965472
btuF	1.12504	5.42736	14.3486	0.00412507	0.00966327
yegH	-0.869449	6.02525	14.3305	0.00414044	0.0096939
fhlA	-0.904159	4.41342	14.3276	0.00414293	0.00969436
sspA	0.940086	8.69263	14.3127	0.00415568	0.00971881
ugpB	-3.56866	7.68098	14.3041	0.00416304	0.00973065
idi	0.808972	4.41784	14.2924	0.00417313	0.00974883
lamB	-1.1715	3.1993	14.2662	0.00419572	0.00979264
yfeN	-1.34319	4.03018	14.2653	0.00419652	0.00979264
hypC	1.68222	1.48036	14.2529	0.00420727	0.00981232
diaA	0.745261	6.08556	14.2365	0.00422157	0.00983641
yfjU	1.28738	3.86224	14.2357	0.00422225	0.00983641
phoR	-3.41444	6.84242	14.2213	0.00423488	0.00986038
tnaA	-1.26247	3.3168	14.1956	0.00425748	0.00990207
casC	-1.32074	4.36675	14.1951	0.00425791	0.00990207
lspA	0.807686	7.25566	14.1929	0.00425981	0.00990207
mltG	-0.744701	6.22551	14.1536	0.00429472	0.0099732
yhhH	1.16176	3.84807	14.1531	0.00429513	0.0099732
tcyP	-1.00199	10.0482	14.1458	0.00430163	0.00998279
ppnN	0.828052	6.02661	14.1366	0.00430991	0.00999654
rpnB	-1.04519	4.84127	14.1321	0.00431391	0.0100003
dnaC	0.810865	5.73572	14.0814	0.00435966	0.0101008
yceH	-1.08869	6.55327	14.0686	0.00437128	0.0101222
cca	-0.75357	7.17899	14.0461	0.00439181	0.0101642
tauC	-1.0921	3.11932	14.0152	0.00442031	0.0102245
astB	-1.46475	5.13736	13.991	0.00444271	0.0102707
ygeL	2.26618	0.585263	13.987	0.00444645	0.0102738
katE	1.00593	4.13319	13.9656	0.00446635	0.0103141
tdcG	-0.960869	3.60061	13.9582	0.00447329	0.0103245
chiQ	0.966796	4.44502	13.9542	0.00447707	0.0103276
zinT	1.35122	3.0794	13.9162	0.00451288	0.0104045
yjiJ	-0.907583	4.8867	13.9061	0.00452245	0.0104209
mlaB	0.823473	7.98637	13.8701	0.00455684	0.0104905
yhbW	1.01674	4.89592	13.8692	0.00455764	0.0104905
ypjI	2.19501	0.541831	13.8238	0.00460142	0.0105855
ubiJ	0.890685	7.45415	13.8016	0.00462305	0.0106295
dgcI	1.22146	5.71152	13.7966	0.00462792	0.0106349
lysP	0.785253	6.11131	13.7658	0.00465813	0.0106985
mpl	-0.875527	8.90535	13.7528	0.00467093	0.0107221
wzxE	0.744375	6.38429	13.719	0.00470446	0.0107932
prpD	-1.3049	2.50062	15.0952	0.0047072	0.0107936
mcrC	1.5628	5.13677	13.7097	0.00471381	0.0108029
ydbL	0.954433	4.85663	13.7036	0.00471988	0.0108109
fadR	0.891923	7.17062	13.6979	0.00472559	0.0108145
coaE	0.883244	6.45163	13.697	0.00472653	0.0108145
yiiF	1.30677	2.91608	13.6863	0.00473724	0.0108331
argE	-0.850776	5.94932	13.6709	0.00475277	0.0108609
yebY	0.671053	6.82768	13.6691	0.00475454	0.0108609
ybjG	-0.866021	7.47943	13.6491	0.00477479	0.0109013
bolA	0.958085	7.88836	13.6376	0.00478648	0.0109221
yjhR	-1.43244	4.33276	13.6246	0.00479979	0.0109465
ygcG	-1.25882	3.00299	13.5942	0.00483089	0.0110115
idnD	-1.61239	2.76156	13.5233	0.00490458	0.0111734
setC	-1.29953	3.04982	13.5187	0.00490944	0.0111785
selD	-0.828762	8.28622	13.5152	0.00491305	0.0111807
norV	-1.04018	3.49893	13.4994	0.00492975	0.0112127
srkA	0.805504	7.26654	13.4648	0.00496637	0.0112899
glvB	1.54616	1.17522	18.7893	0.00497648	0.011301
fecD	1.79454	4.72966	13.4541	0.0049778	0.011301
yjiN	-0.859613	4.37458	13.4527	0.0049793	0.011301
yiaC	0.83084	4.57972	13.4396	0.00499338	0.0113269
atoB	-1.15065	2.90836	13.4259	0.00500804	0.0113541
truA	-0.80235	7.25174	13.3761	0.00506197	0.0114702
rnhB	1.14465	6.31543	13.3663	0.00507265	0.011483
tolB	-0.873113	9.89238	13.366	0.00507305	0.011483
csdE	0.691751	6.68422	13.3325	0.00510978	0.0115583
pyrC	1.09688	6.77323	13.3307	0.00511182	0.0115583
patZ	-0.820678	5.22183	13.3232	0.00512011	0.0115709
mhpB	-0.936887	4.00673	13.3101	0.00513458	0.0115962
yeeW	1.51231	1.22131	15.6332	0.0051368	0.0115962
yciF	1.6988	2.49667	13.2859	0.00516151	0.0116458
ygjH	1.57889	1.21394	13.2382	0.00521509	0.0117604
sbmC	0.769691	6.10574	13.2266	0.00522818	0.0117836
sbcD	0.712812	5.27557	13.1821	0.005279	0.0118918
yoaC	0.876285	6.18993	13.179	0.00528256	0.0118935
astD	-1.7869	5.33342	13.1716	0.00529105	0.0119054
hypA	1.79029	0.905737	13.1695	0.00529349	0.0119054
cysD	-1.52575	9.37773	13.1594	0.00530512	0.0119252
adiY	1.14227	2.15958	13.1076	0.00536536	0.0120542
pstS	-3.43957	9.45286	13.0902	0.00538576	0.0120936
arsC	1.19243	2.86375	13.0699	0.00540972	0.012141
dsdA	-0.846107	4.27358	13.0617	0.00541934	0.0121561
yaiS	2.59152	1.05714	13.0439	0.00544055	0.0121972
truC	-0.777173	5.48885	13.0288	0.00545851	0.012231
cbtA	1.13617	2.69819	13.0219	0.00546677	0.012243
citF	-1.63401	1.99025	17.3202	0.00548523	0.0122778
arfA	1.26201	6.50744	12.9768	0.00552115	0.0123517
yeeD	1.5164	9.77571	12.946	0.00555856	0.0124288
ydaT	1.42336	1.57562	12.9374	0.00556914	0.0124459
hcaR	-0.796325	4.71691	12.9202	0.00559027	0.0124865
gldA	-0.959499	4.62714	12.9178	0.00559326	0.0124866
yhfK	-0.886297	5.60591	12.9056	0.00560821	0.0125134
waaG	-0.77922	7.05508	12.8974	0.00561845	0.0125238
nfo	0.952586	5.66891	12.8971	0.0056188	0.0125238
rfbC	0.818794	7.57625	12.8798	0.00564026	0.012565
yfaZ	-0.92977	5.92402	12.8646	0.00565915	0.0126004
alsK	-0.950076	4.3554	12.8431	0.00568609	0.0126526
mcrB	0.776025	6.04606	12.8412	0.00568857	0.0126526
fixC	-1.41209	2.23887	13.4199	0.0056943	0.0126587
yeeR	1.4636	5.54838	12.7908	0.00575228	0.0127808
eutA	-1.31654	2.53154	12.7338	0.00582552	0.012931
yqeF	-0.696515	5.76673	12.7334	0.005826	0.012931
damX	-0.957693	9.06137	12.7042	0.00586403	0.0130086
nimT	1.14247	3.81594	12.6876	0.00588568	0.0130498
nlpA	-1.53914	7.64921	12.6504	0.00593468	0.0131515
yaiY	1.17046	4.08	12.6389	0.00595001	0.0131786
yahC	-1.27137	3.12283	12.6352	0.0059549	0.0131802
actP	-0.832707	3.58344	12.6336	0.00595699	0.0131802
nagZ	-0.747136	6.99761	12.6277	0.00596486	0.0131907
yciC	0.65699	6.3302	12.6006	0.00600118	0.0132641
pxpA	-0.642774	6.18837	12.5918	0.00601288	0.013283
tfaQ	-1.53492	3.02639	12.5769	0.00603306	0.0133207
ldtA	-0.745347	5.80305	12.5739	0.00603706	0.0133225
ynaM	1.55825	4.24372	12.5501	0.00606938	0.0133868
galR	-0.859369	4.91986	12.5466	0.00607415	0.0133904
ubiF	-0.741093	7.06583	12.5315	0.00609473	0.0134237
acpH	0.711155	4.48329	12.5309	0.00609563	0.0134237
bax	0.824889	7.21657	12.5186	0.00611242	0.0134537
fadI	-1.28132	4.61678	12.4959	0.00614366	0.0135154
ldcA	-0.719766	5.34696	12.4899	0.00615205	0.0135268
ymjC	1.30671	1.63785	12.4686	0.0061815	0.0135845
gfcE	-1.12613	3.2265	12.4554	0.00619993	0.0136179
agaS	-1.1441	2.97717	12.4198	0.00624991	0.0137206
ygjR	0.807279	5.3848	12.4033	0.00627326	0.0137647
tsgA	1.37888	6.86804	12.3793	0.00630732	0.0138322
abgR	-0.981003	3.38674	12.3742	0.00631473	0.0138413
hslU	1.34985	8.23505	12.3691	0.00632197	0.0138418
yjiM	-1.64833	2.93831	12.3685	0.00632286	0.0138418
ygdI	1.26791	6.27483	12.3671	0.00632478	0.0138418
hcxB	-0.770714	6.50258	12.3615	0.00633286	0.0138437
nrdG	1.60512	3.67128	12.3612	0.00633324	0.0138437
yacH	-1.08185	4.12489	12.3597	0.00633546	0.0138437
yeaY	0.814105	7.26078	12.3407	0.00636278	0.0138962
pphC	-1.67879	2.60811	12.3242	0.00638665	0.0139411
hyaB	-2.37359	6.28779	12.3042	0.00641565	0.0139972
glxK	-1.29987	4.24971	12.2895	0.00643705	0.0140366
nuoA	1.01677	7.13651	12.2863	0.00644174	0.0140396
[truncated: 2,287 more rows]
